# Supplementary material for: Purified fibers in chemically defined synthetic diets destabilize the gut microbiome of an omnivorous insect model
Source: Frontiers journal article supplement (doi:10.3389/frmbi.2024.1477521), 2024-12-12
Supplement: Image_1.pdf [file Image_1.pdf]

**A. Weighted Bray-Curtis NMDS**

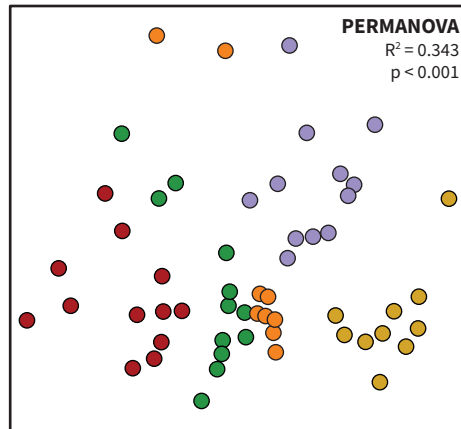

**B. Unweighted Bray-Curtis NMDS**

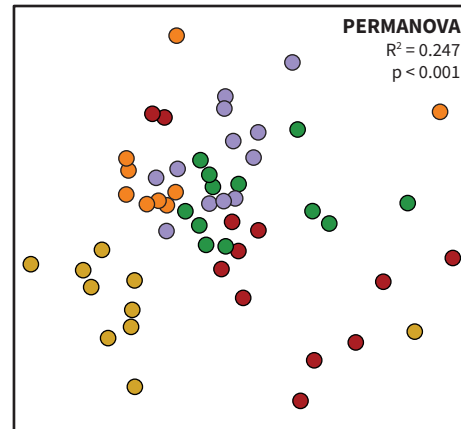

Synthetic diets

■ MCC ■ Methylcellulose ■ Starch ■ Chitin ■ Pectin

**Supplement 1: NMDS ordination analysis of synthetic diet samples excluding xylan-fed cockroaches.** As in Figure 1, samples were rarefied a constant depth of 7924 sequences for alpha and beta diversity calculations. Non-metric multidimensional scaling (NMDS) was used to plot **(A)** weighted and **(B)** unweighted Bray-Curtis dissimilarity of gut communities from synthetic diets, excluding those fed the xylan diet. Multivariate analysis was performed using PERMANOVA.
