# Supplementary material for: Purified fibers in chemically defined synthetic diets destabilize the gut microbiome of an omnivorous insect model
Source: Frontiers journal article supplement (doi:10.3389/frmbi.2024.1477521), 2024-12-12
Supplement: Image_3.pdf [file Image_3.pdf]

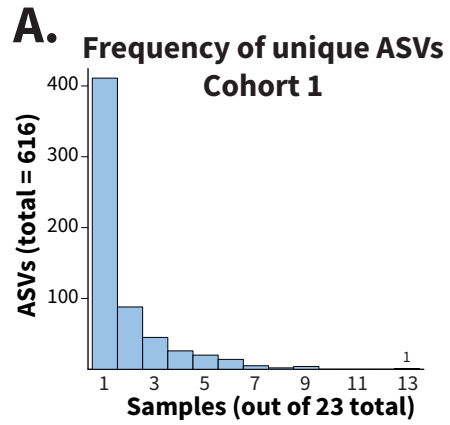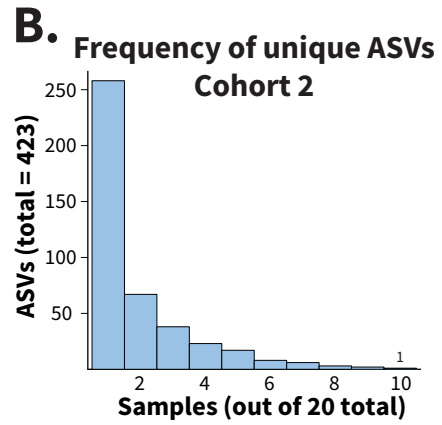

**Supplement 3 : Most unique ASVs in the Xylan/MCC replicate experiments are singletons.**

Unique ASVs from the rarefied (A) Cohort 1 and (B) Cohort 2 data were assessed for frequency of occurrence using the histogram function in R. Samples were rarefied to 9685 ASVs for comparison.
