# Supplementary material for: Purified fibers in chemically defined synthetic diets destabilize the gut microbiome of an omnivorous insect model
Source: Frontiers journal article supplement (doi:10.3389/frmbi.2024.1477521), 2024-12-12
Supplement: Image_7.pdf [file Image_7.pdf]

**A.****Weighted Bray-Curtis**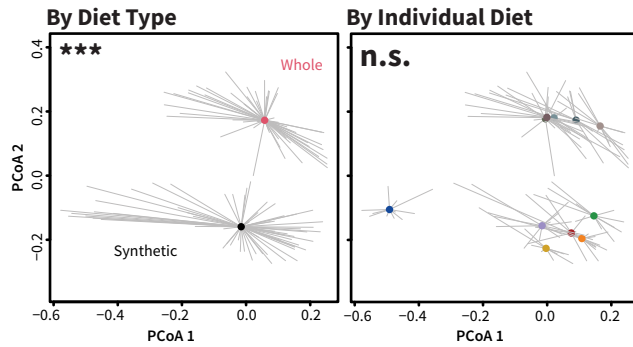**B.****Unweighted Bray-Curtis**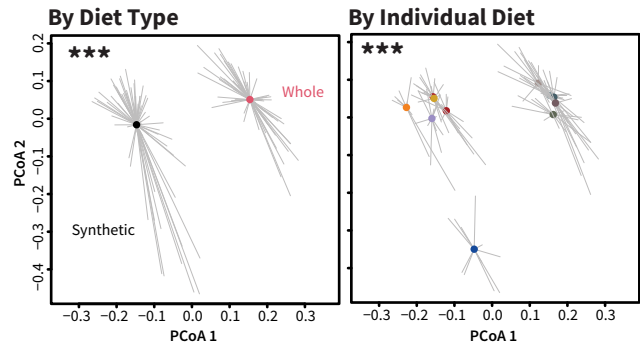**C.****Weighted Bray-Curtis (no Xylan)**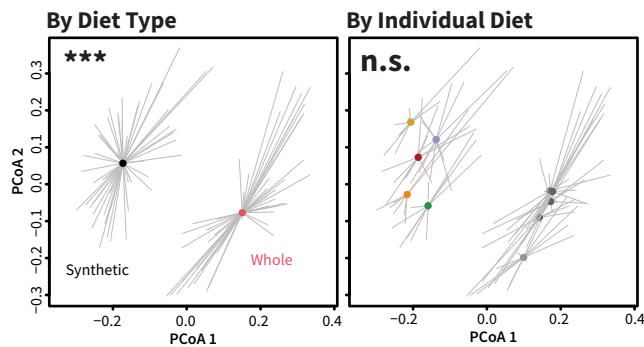**D.****Unweighted Bray-Curtis (no Xylan)**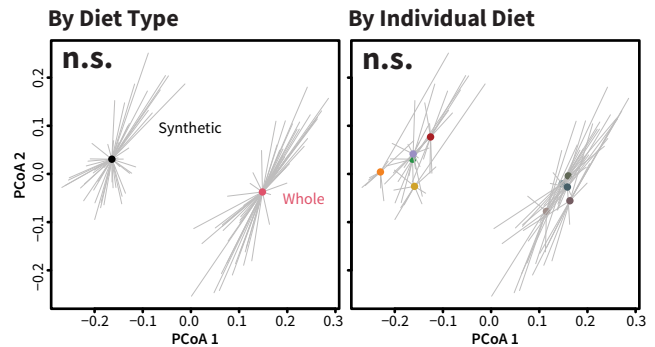

**Supplement 7: Beta dispersion analysis of whole food and synthetic diets, with and without xylan-fed samples.** The dispersion of (A,C) weighted and (B,D) unweighted Bray-Curtis dissimilarities was assessed for both diet group and individual diets, both (A,B) with and (C,D) without xylan-fed samples included in analysis. All samples were rarefied to 7924 ASVs for beta dispersion analysis, and ANOVA statistical testing was used to evaluate if dispersion differed between groups/diets. \*\*\* =  $p < 0.001$ , ns = no significance
