# Supplementary material for: Purified fibers in chemically defined synthetic diets destabilize the gut microbiome of an omnivorous insect model
Source: Frontiers journal article supplement (doi:10.3389/frmbi.2024.1477521), 2024-12-12
Supplement: Image_10.pdf [file Image_10.pdf]

| Food Category   | Intersection Size |
|-----------------|-------------------|
| WhiteFlour      | 136               |
| WheatFlour      | 24                |
| Tuna            | 18                |
| Honey           | 15                |
| Butter          | 15                |
| Chitin          | 13                |
| Methylcellulose | 11                |
| MCC             | 9                 |
| Pectin          | 9                 |
| Starch          | 5                 |
| Xylan           | 5                 |

[illegible][illegible]

**Supplement 10: Additional UpSet plots.** The rarefied samples (7924 depth) from whole food and synthetic diets were used to generate UpSet plots. **(A)** depicts sets where ASVs are found in all but one of the diets. **(B)** depicts sets found in only two diets. **(C)** contains remaining sets not yet displayed with at least 5 ASVs. Additional sets were not included.
