# Supplementary material for: Purified fibers in chemically defined synthetic diets destabilize the gut microbiome of an omnivorous insect model
Source: Frontiers journal article supplement (doi:10.3389/frmbi.2024.1477521), 2024-12-12
Supplement: Image_13.pdf [file Image_13.pdf]

## Whole Food Network

## Synthetic Diet Network

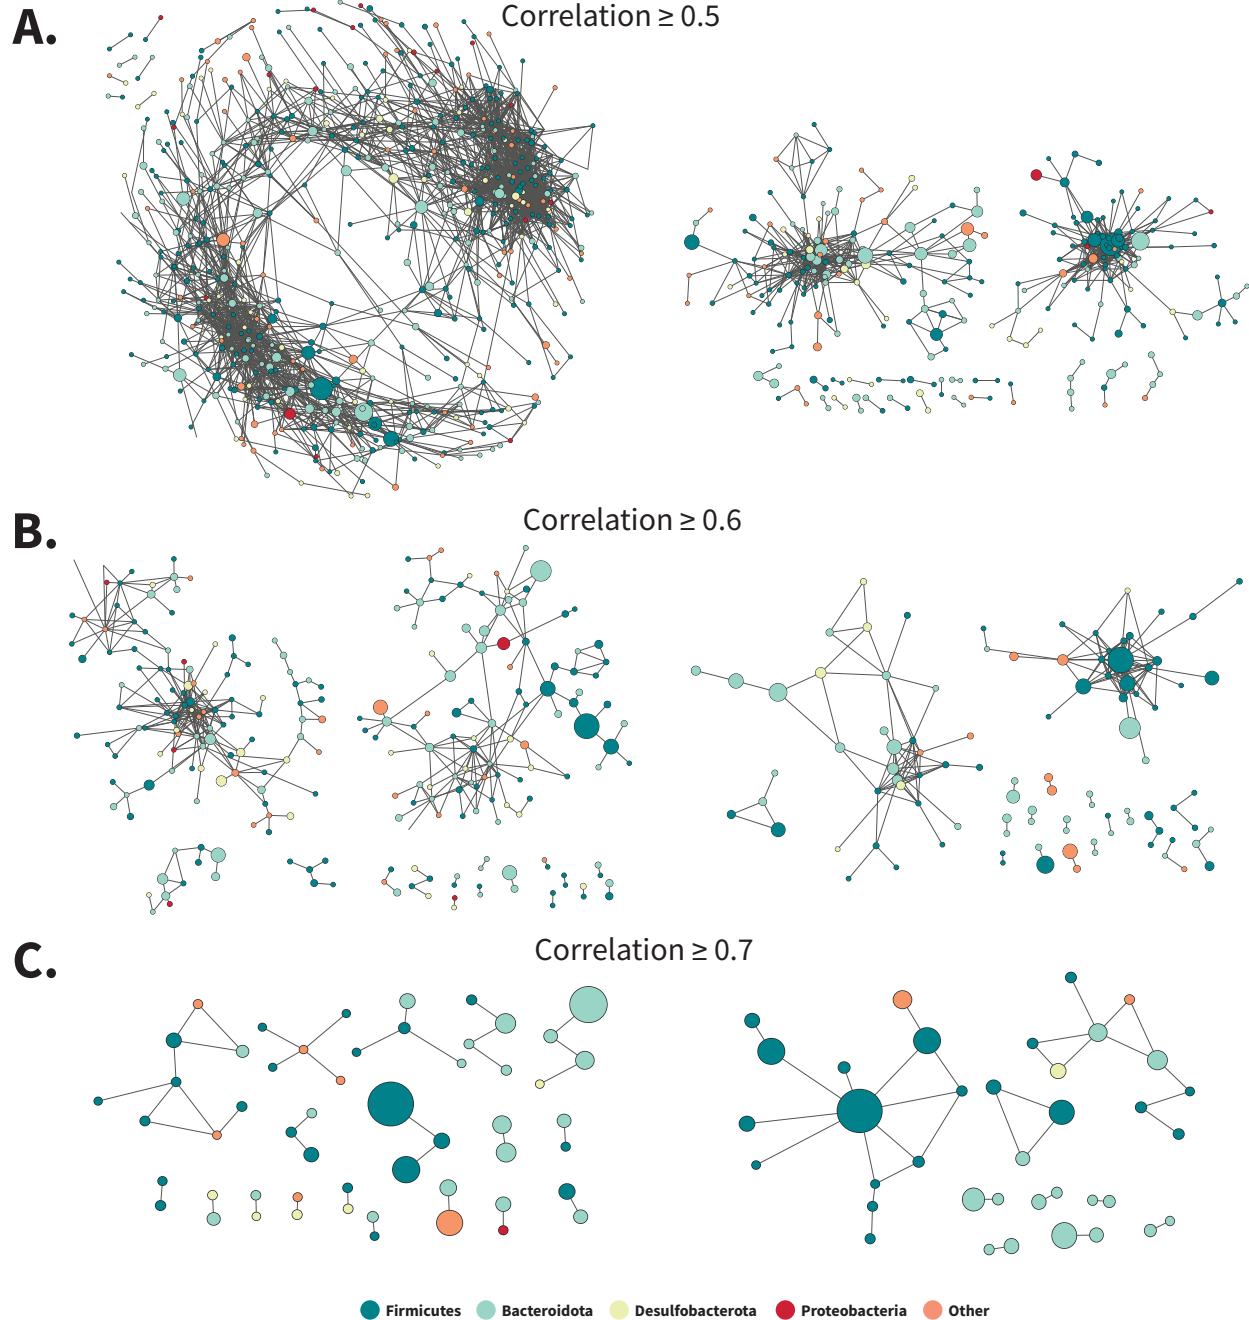

**Supplement 13: Whole food and synthetic networks at higher correlation cut-off levels.** Networks generated for Figures 6 and S11 were filtered in Cytoscape by edge weight to visualize networks at (A) 0.5, (B) 0.6, and (C) 0.7 SparCC correlation values, with isolated nodes removed if they lost all adjacent edges. Data on edges, nodes, and connected components at these cut-off levels are presented in Figure 6C-E.
