# Supplementary material for: Purified fibers in chemically defined synthetic diets destabilize the gut microbiome of an omnivorous insect model
Source: Front Microbiomes. 2024 Dec 12;3:1477521. doi: 10.3389/frmbi.2024.1477521 (PMC11925550; doi:10.3389/frmbi.2024.1477521)
Supplement: Supplementary file 1 [file DataSheet1.xlsx]

## Sheet: Page One
	This supplementary table contains the UpSet Sets and UpSet presence/absence table for the Whole Food and Synthetic diet comparisons

## Sheet: UpSet Sets
Set 1	Set 2	Set 3	Set 4	Set 5	MCC Unique	Chitin Unique	Pectin Unique	Xylan Unique	Methylcellulose Unique	Starch Unique	Tuna Unique	Butter Unique	WheatFlour Unique	WhiteFlour Unique	Honey Unique
Bacteria_Firmicutes_Clostridia_Lachnospirales_Lachnospiraceae_Lachnoclostridium_NA	Archaea_Thermoplasmatota_Thermoplasmata_Methanomassiliicoccales_Methanomethylophilaceae_CandidatusMethanogranum_NA	Bacteria_Firmicutes_Clostridia_Oscillospirales_Ruminococcaceae_Ruminococcus_NA	Bacteria_Firmicutes_Bacilli_RF39_NA_NA_NA.1	Bacteria_Firmicutes_Clostridia_Peptococcales_Peptococcaceae_NA_NA.5	Bacteria_Bacteroidota_Bacteroidia_Bacteroidales_Tannerellaceae_NA_NA.9	Bacteria_Firmicutes_Clostridia_Christensenellales_Christensenellaceae_ChristensenellaceaeR.7group_NA.151	Bacteria_Firmicutes_Clostridia_Monoglobales_Monoglobaceae_Monoglobus_NA.1	Bacteria_Firmicutes_Bacilli_RF39_NA_NA_NA.17	Bacteria_Firmicutes_Clostridia_Oscillospirales_Oscillospiraceae_NA_NA.25	Bacteria_Fusobacteriota_Fusobacteriia_Fusobacteriales_Fusobacteriaceae_Fusobacterium_varium	Bacteria_Actinobacteriota_Actinobacteria_Corynebacteriales_Nocardiaceae_Rhodococcus_NA	Bacteria_Bacteroidota_Bacteroidia_Bacteroidales_Tannerellaceae_Parabacteroides_NA.26	Bacteria_Firmicutes_Bacilli_Lactobacillales_Lactobacillaceae_Lactobacillus_NA.6	Bacteria_Firmicutes_Bacilli_Lactobacillales_Enterococcaceae_Enterococcus_NA.6	Bacteria_Firmicutes_Clostridia_Lachnospirales_Lachnospiraceae_Lachnoclostridium_NA.9
Bacteria_Bacteroidota_Bacteroidia_Bacteroidales_Bacteroidaceae_Bacteroides_NA	Bacteria_Bacteroidota_Bacteroidia_Bacteroidales_Tannerellaceae_Parabacteroides_NA.3	Bacteria_Fusobacteriota_Fusobacteriia_Fusobacteriales_Fusobacteriaceae_Fusobacterium_ulcerans	Bacteria_Firmicutes_Clostridia_Lachnospirales_Lachnospiraceae_NA_NA.10	Bacteria_Bacteroidota_Bacteroidia_Bacteroidales_Rikenellaceae_RikenellaceaeRC9gutgroup_NA.9	Bacteria_Desulfobacterota_Desulfovibrionia_Desulfovibrionales_Desulfovibrionaceae_Desulfovibrio_NA.148	Bacteria_Firmicutes_Clostridia_Lachnospirales_Lachnospiraceae_Tyzzerella_NA.40	Bacteria_Bdellovibrionota_Bdellovibrionia_Bacteriovoracales_Bacteriovoracaceae_Peredibacter_NA.2	Bacteria_Firmicutes_Clostridia_ClostridiaUCG.014_NA_NA_NA.13	Bacteria_Firmicutes_Clostridia_Oscillospirales_Ruminococcaceae_NA_NA.139	Bacteria_Firmicutes_Clostridia_Lachnospirales_Lachnospiraceae_NA_NA.3	Bacteria_Patescibacteria_Gracilibacteria_JGI0000069.P22_NA_NA_NA.9	Bacteria_Proteobacteria_Alphaproteobacteria_Rhizobiales_Beijerinckiaceae_Methylobacterium.Methylorubrum_NA.1	Bacteria_Desulfobacterota_Desulfovibrionia_Desulfovibrionales_Desulfovibrionaceae_Desulfovibrio_NA.178	Bacteria_Planctomycetota_Planctomycetes_Pirellulales_Pirellulaceae_Termiteplanctomycetecluster_NA.30	Bacteria_Desulfobacterota_Desulfovibrionia_Desulfovibrionales_Desulfovibrionaceae_Desulfovibrio_NA.158
Bacteria_Bacteroidota_Bacteroidia_Bacteroidales_vadinHA21_NA_NA	Bacteria_Bacteroidota_Bacteroidia_Bacteroidales_PeH15_NA_NA.1	Bacteria_Bacteroidota_Bacteroidia_Bacteroidales_Tannerellaceae_NA_NA.2	Bacteria_Bacteroidota_Bacteroidia_Bacteroidales_Dysgonomonadaceae_Dysgonomonas_NA.18	Bacteria_Firmicutes_Clostridia_NA_NA_NA_NA.11	Bacteria_Bacteroidota_Bacteroidia_Bacteroidales_Dysgonomonadaceae_CandidatusSymbiothrix_NA.6	Bacteria_Firmicutes_Bacilli_RF39_NA_NA_NA.71	Bacteria_Firmicutes_Clostridia_Oscillospirales_Oscillospiraceae_NA_NA.46	Bacteria_Firmicutes_Clostridia_Oscillospirales_Ruminococcaceae_NA_NA.111	Bacteria_Bacteroidota_Bacteroidia_Bacteroidales_Tannerellaceae_Parabacteroides_NA.34	Bacteria_Firmicutes_Clostridia_Lachnospirales_Lachnospiraceae_IncertaeSedis_NA.3	Bacteria_Firmicutes_Clostridia_Oscillospirales_Butyricicoccaceae_UCG.009_NA.17	Bacteria_Bacteroidota_Bacteroidia_Bacteroidales_Rikenellaceae_Alistipes_NA.60	Bacteria_Bacteroidota_Bacteroidia_Bacteroidales_Marinifilaceae_Sanguibacteroides_NA.8	Bacteria_Firmicutes_Clostridia_Oscillospirales_Ruminococcaceae_NA_NA.156	Bacteria_Bacteroidota_Bacteroidia_Bacteroidales_PeH15_NA_NA.4
Archaea_Halobacterota_Methanosarcinia_Methanosarciniales_Methanosarcinaceae_Methanimicrococcus_NA	Bacteria_Verrucomicrobiota_Kiritimatiellae_WCHB1.41_NA_NA_NA	Bacteria_Firmicutes_Bacilli_Erysipelotrichales_Erysipelatoclostridiaceae_Erysipelatoclostridium_NA.3	Bacteria_Firmicutes_Clostridia_Oscillospirales_Ruminococcaceae_NA_NA.30	Bacteria_Bacteroidota_Bacteroidia_Bacteroidales_Rikenellaceae_Alistipes_NA.38	Bacteria_Bacteroidota_Bacteroidia_Bacteroidales_Tannerellaceae_NA_NA.12	Bacteria_Firmicutes_Bacilli_RF39_NA_NA_NA.74	Bacteria_Proteobacteria_Alphaproteobacteria_Paracaedibacterales_Paracaedibacteraceae_NA_NA.1	Bacteria_Planctomycetota_vadinHA49_NA_NA_NA_NA.36	Bacteria_Firmicutes_Clostridia_Oscillospirales_Ruminococcaceae_CandidatusSoleaferrea_NA.54	Bacteria_NA_NA_NA_NA_NA_NA	Bacteria_Firmicutes_Clostridia_Christensenellales_Christensenellaceae_ChristensenellaceaeR.7group_NA.163	Bacteria_Bacteroidota_Bacteroidia_Bacteroidales_Tannerellaceae_Parabacteroides_NA.31	Bacteria_Firmicutes_Clostridia_Christensenellales_Christensenellaceae_ChristensenellaceaeR.7group_NA.205	Bacteria_Bacteroidota_Bacteroidia_Bacteroidales_Tannerellaceae_Parabacteroides_NA.37	Bacteria_Firmicutes_Clostridia_Christensenellales_Christensenellaceae_NA_NA.68
Bacteria_Bacteroidota_Bacteroidia_Bacteroidales_Marinifilaceae_Odoribacter_NA	Bacteria_Bacteroidota_Bacteroidia_Sphingobacteriales_NA_NA_NA	Bacteria_Bacteroidota_Bacteroidia_Bacteroidales_Bacteroidaceae_Bacteroides_NA.17	Bacteria_Proteobacteria_Alphaproteobacteria_Rhodospirillales_NA_NA_NA.2	Bacteria_Firmicutes_Clostridia_Christensenellales_Christensenellaceae_ChristensenellaceaeR.7group_NA.62	Bacteria_Firmicutes_Clostridia_Oscillospirales_Ruminococcaceae_NA_NA.138	Bacteria_Firmicutes_Clostridia_Oscillospirales_Oscillospiraceae_NA_NA.39	Bacteria_Bdellovibrionota_Oligoflexia_Oligoflexales_NA_NA_NA.6	Bacteria_Firmicutes_Clostridia_Christensenellales_Christensenellaceae_NA_NA.53	Bacteria_Planctomycetota_Planctomycetes_Pirellulales_Pirellulaceae_Termiteplanctomycetecluster_NA.33	Archaea_Euryarchaeota_Methanobacteria_Methanobacteriales_Methanobacteriaceae_Methanobrevibacter_NA.3	Bacteria_Firmicutes_Clostridia_Lachnospirales_Lachnospiraceae_Tyzzerella_NA.38	Bacteria_Firmicutes_Clostridia_Oscillospirales_Oscillospiraceae_NK4A214group_NA.12	Bacteria_Firmicutes_Bacilli_RF39_NA_NA_NA.81	Bacteria_Firmicutes_Clostridia_Oscillospirales_Ruminococcaceae_NA_NA.191	Bacteria_Proteobacteria_Alphaproteobacteria_NA_NA_NA_NA.18
Bacteria_Bacteroidota_Bacteroidia_Bacteroidales_COBP4.1termitegroup_NA_NA	Bacteria_Desulfobacterota_Desulfobulbia_Desulfobulbales_Desulfobulbaceae_Desulfobulbus_NA.1	Bacteria_Bacteroidota_Bacteroidia_Bacteroidales_Dysgonomonadaceae_NA_NA.11	Bacteria_Firmicutes_Clostridia_Lachnospirales_Lachnospiraceae_NA_NA.20	Bacteria_Bacteroidota_Bacteroidia_Bacteroidales_Dysgonomonadaceae_CandidatusSymbiothrix_NA.2	Bacteria_Firmicutes_Clostridia_Oscillospirales_Ruminococcaceae_NA_NA.145	Bacteria_Firmicutes_Clostridia_Lachnospirales_Lachnospiraceae_NA_NA.52	Bacteria_Bacteroidota_Bacteroidia_Bacteroidales_Rikenellaceae_Rikenella_NA.4	Bacteria_Firmicutes_Bacilli_RF39_NA_NA_NA.57	Bacteria_Firmicutes_Clostridia_Christensenellales_Christensenellaceae_ChristensenellaceaeR.7group_NA.182	Bacteria_Bacteroidota_Bacteroidia_Bacteroidales_Dysgonomonadaceae_NA_NA.18	Bacteria_Bacteroidota_Bacteroidia_Bacteroidales_Rikenellaceae_Alistipes_NA.68	Bacteria_Firmicutes_Clostridia_Oscillospirales_Ruminococcaceae_NA_NA.150	Bacteria_Firmicutes_Clostridia_Oscillospirales_Ruminococcaceae_CandidatusSoleaferrea_NA.72	Bacteria_Spirochaetota_Spirochaetia_Spirochaetales_Spirochaetaceae_Treponema_NA.12	Bacteria_Firmicutes_Clostridia_ClostridiaUCG.014_NA_NA_NA.59
Bacteria_Firmicutes_Bacilli_Lactobacillales_Enterococcaceae_NA_NA	Bacteria_Bacteroidota_Bacteroidia_Bacteroidales_vadinHA21_NA_NA.1	Bacteria_Bacteroidota_Bacteroidia_Bacteroidales_Tannerellaceae_NA_NA.3	Bacteria_Bacteroidota_Bacteroidia_Bacteroidales_Rikenellaceae_Alistipes_NA.34	Bacteria_Bacteroidota_Bacteroidia_Bacteroidales_Dysgonomonadaceae_Dysgonomonas_NA.24	Bacteria_Firmicutes_Clostridia_ClostridiavadinBB60group_NA_NA_NA.32	Bacteria_Proteobacteria_Alphaproteobacteria_NA_NA_NA_NA.26	Bacteria_Bacteroidota_Bacteroidia_Bacteroidales_Rikenellaceae_Alistipes_NA.99	Bacteria_Firmicutes_Clostridia_Christensenellales_Christensenellaceae_NA_NA.62	Bacteria_Firmicutes_Clostridia_Christensenellales_Christensenellaceae_NA_NA.58	Bacteria_Bacteroidota_Bacteroidia_Bacteroidales_Paludibacteraceae_Paludibacter_NA.2	Bacteria_Firmicutes_Clostridia_Oscillospirales_Oscillospiraceae_NK4A214group_NA.10	Bacteria_Proteobacteria_Alphaproteobacteria_Rhizobiales_Beijerinckiaceae_Methylobacterium.Methylorubrum_NA.2	Bacteria_Firmicutes_Clostridia_Oscillospirales_Ruminococcaceae_CandidatusSoleaferrea_NA.73	Bacteria_Firmicutes_Bacilli_RF39_NA_NA_NA.82	Bacteria_Firmicutes_Clostridia_Lachnospirales_Lachnospiraceae_NA_NA.50
Bacteria_Bacteroidota_Bacteroidia_Bacteroidales_Marinifilaceae_Sanguibacteroides_NA	Bacteria_Bacteroidota_Bacteroidia_Bacteroidales_Bacteroidaceae_Bacteroides_NA.14	Bacteria_Firmicutes_Clostridia_ClostridiaUCG.014_NA_NA_NA.1	Bacteria_NA_NA_NA_NA_NA_NA.1	Bacteria_Firmicutes_Clostridia_Christensenellales_Christensenellaceae_ChristensenellaceaeR.7group_NA.72	Bacteria_Firmicutes_Clostridia_Oscillospirales_Ruminococcaceae_NA_NA.167	Bacteria_Firmicutes_Clostridia_Oscillospirales_Ruminococcaceae_NA_NA.211	Bacteria_Firmicutes_Clostridia_Christensenellales_Christensenellaceae_NA_NA.121	Bacteria_Firmicutes_Clostridia_Christensenellales_Christensenellaceae_NA_NA.65	Bacteria_Firmicutes_Clostridia_Oscillospirales_Ruminococcaceae_NA_NA.165	Bacteria_Bacteroidota_Bacteroidia_Bacteroidales_Rikenellaceae_NA_NA.4	Bacteria_Firmicutes_Clostridia_Lachnospirales_Lachnospiraceae_Tyzzerella_NA.45	Bacteria_Firmicutes_Clostridia_ClostridiavadinBB60group_NA_NA_NA.37	Bacteria_Firmicutes_Clostridia_Oscillospirales_Ruminococcaceae_CandidatusSoleaferrea_NA.74	Bacteria_Bacteroidota_Bacteroidia_Bacteroidales_Dysgonomonadaceae_NA_NA.43	Bacteria_Firmicutes_Clostridia_Oscillospirales_Ruminococcaceae_NA_NA.197
Bacteria_Bacteroidota_Bacteroidia_Bacteroidales_Bacteroidaceae_Bacteroides_NA.1	Bacteria_Firmicutes_Clostridia_Oscillospirales_Butyricicoccaceae_UCG.009_NA.1	Bacteria_Bacteroidota_Bacteroidia_Bacteroidales_Rikenellaceae_RikenellaceaeRC9gutgroup_NA.8	Archaea_Euryarchaeota_Methanobacteria_Methanobacteriales_Methanobacteriaceae_Methanobrevibacter_NA.4	Bacteria_Bacteroidota_Bacteroidia_Bacteroidales_COBP4.1termitegroup_NA_NA.2	Bacteria_Firmicutes_Clostridia_Eubacteriales_Eubacteriaceae_NA_NA	Bacteria_Bdellovibrionota_Bdellovibrionia_Bacteriovoracales_Bacteriovoracaceae_Peredibacter_NA.4	Bacteria_Firmicutes_Clostridia_Oscillospirales_Ruminococcaceae_NA_NA.302	Bacteria_Firmicutes_Clostridia_Oscillospirales_Ruminococcaceae_CandidatusSoleaferrea_NA.69	Bacteria_Firmicutes_Clostridia_Oscillospirales_Ruminococcaceae_NA_NA.174	Bacteria_Firmicutes_Clostridia_Oscillospirales_Oscillospiraceae_Colidextribacter_NA.6	Bacteria_Firmicutes_Clostridia_ClostridiaUCG.014_NA_NA_NA.41	Bacteria_Firmicutes_Clostridia_NA_NA_NA_NA.50	Bacteria_Firmicutes_Clostridia_Christensenellales_Christensenellaceae_ChristensenellaceaeR.7group_NA.233	Bacteria_Firmicutes_Bacilli_RF39_NA_NA_NA.99	Bacteria_Firmicutes_Clostridia_Oscillospirales_Ruminococcaceae_CandidatusSoleaferrea_NA.78
Bacteria_Bacteroidota_Bacteroidia_Bacteroidales_Tannerellaceae_Parabacteroides_NA	Bacteria_Bacteroidota_Bacteroidia_Bacteroidales_Dysgonomonadaceae_NA_NA.10	Bacteria_Firmicutes_Clostridia_Christensenellales_Christensenellaceae_ChristensenellaceaeR.7group_NA.31	Bacteria_Firmicutes_Clostridia_Lachnospirales_Lachnospiraceae_LachnospiraceaeUCG.010_NA.1	Bacteria_Bacteroidota_Bacteroidia_Bacteroidales_M2PB4.65termitegroup_NA_NA.9	Bacteria_Firmicutes_Clostridia_Oscillospirales_Ruminococcaceae_NA_NA.168	Bacteria_Proteobacteria_Alphaproteobacteria_Rhodospirillales_NA_NA_NA.89	Bacteria_Proteobacteria_Alphaproteobacteria_NA_NA_NA_NA.43	Bacteria_Firmicutes_Clostridia_Lachnospirales_Lachnospiraceae_NA_NA.49	Bacteria_Firmicutes_Clostridia_Christensenellales_Christensenellaceae_NA_NA.64	Bacteria_Firmicutes_Clostridia_NA_NA_NA_NA.13	Bacteria_Firmicutes_Clostridia_Christensenellales_Christensenellaceae_NA_NA.56	Bacteria_Firmicutes_Clostridia_Oscillospirales_Oscillospiraceae_NK4A214group_NA.13	Bacteria_Firmicutes_Clostridia_Christensenellales_Christensenellaceae_ChristensenellaceaeR.7group_NA.235	Bacteria_Desulfobacterota_Desulfovibrionia_Desulfovibrionales_Desulfovibrionaceae_Desulfovibrio_NA.220	Bacteria_Firmicutes_Clostridia_Oscillospirales_Ruminococcaceae_NA_NA.205
Bacteria_Firmicutes_Bacilli_Lactobacillales_Enterococcaceae_Enterococcus_NA	Bacteria_Firmicutes_Clostridia_Oscillospirales_Oscillospiraceae_NA_NA	Bacteria_Firmicutes_Bacilli_RF39_NA_NA_NA.5	Bacteria_Firmicutes_Clostridia_Oscillospirales_Hydrogenoanaerobacterium_NA_NA.3	Bacteria_Firmicutes_Clostridia_Oscillospirales_Oscillospiraceae_NA_NA.10	Bacteria_Firmicutes_Bacilli_Lactobacillales_Lactobacillaceae_Lactobacillus_NA.10	Bacteria_Firmicutes_Clostridia_Lachnospirales_Lachnospiraceae_Anaerostignum_NA	Bacteria_Proteobacteria_Gammaproteobacteria_Xanthomonadales_Xanthomonadaceae_Stenotrophomonas_NA.4	Bacteria_Firmicutes_Clostridia_Christensenellales_Christensenellaceae_NA_NA.73	Bacteria_Firmicutes_Clostridia_Oscillospirales_Ruminococcaceae_CandidatusSoleaferrea_NA.63	Bacteria_Firmicutes_Clostridia_Oscillospirales_Oscillospiraceae_Oscillibacter_NA	Bacteria_Firmicutes_Clostridia_Oscillospirales_Ruminococcaceae_CandidatusSoleaferrea_NA.62	Bacteria_Bacteroidota_Bacteroidia_Bacteroidales_Rikenellaceae_Alistipes_NA.88	Bacteria_Proteobacteria_Gammaproteobacteria_Burkholderiales_Comamonadaceae_NA_NA	Bacteria_Desulfobacterota_Desulfovibrionia_Desulfovibrionales_Desulfovibrionaceae_Desulfovibrio_NA.227	Bacteria_Firmicutes_Clostridia_Christensenellales_Christensenellaceae_ChristensenellaceaeR.7group_NA.236
Bacteria_Firmicutes_Clostridia_Lachnospirales_Lachnospiraceae_Lachnoclostridium_NA.1	Bacteria_Verrucomicrobiota_Verrucomicrobiae_LD1.PB3_NA_NA_NA	Bacteria_Bacteroidota_Bacteroidia_Bacteroidales_Rikenellaceae_Alistipes_NA.35	Bacteria_Bacteroidota_Bacteroidia_Bacteroidales_Paludibacteraceae_H1_NA.1	Bacteria_Proteobacteria_Gammaproteobacteria_Burkholderiales_NA_NA_NA.2	Bacteria_Bacteroidota_Bacteroidia_Bacteroidales_Dysgonomonadaceae_NA_NA.39	Bacteria_Firmicutes_Clostridia_Oscillospirales_Ruminococcaceae_NA_NA.251	Bacteria_Proteobacteria_Alphaproteobacteria_Rhizobiales_Rhizobiaceae_Pseudochrobactrum_NA	Bacteria_Firmicutes_Clostridia_Oscillospirales_Ruminococcaceae_NA_NA.206	Bacteria_Firmicutes_Clostridia_Oscillospirales_Ruminococcaceae_CandidatusSoleaferrea_NA.64	Bacteria_Firmicutes_Clostridia_Lachnospirales_Lachnospiraceae_Lachnoclostridium_NA.7	Bacteria_Firmicutes_Clostridia_Oscillospirales_Ruminococcaceae_CandidatusSoleaferrea_NA.67	Bacteria_Firmicutes_Clostridia_Christensenellales_Christensenellaceae_NA_NA.79	Bacteria_Firmicutes_Clostridia_Lachnospirales_Lachnospiraceae_Tyzzerella_NA.56	Bacteria_Planctomycetota_Planctomycetes_Pirellulales_Pirellulaceae_Termiteplanctomycetecluster_NA.47	Bacteria_Firmicutes_Clostridia_Lachnospirales_Lachnospiraceae_IncertaeSedis_NA.12
Bacteria_Proteobacteria_Gammaproteobacteria_Enterobacterales_Enterobacteriaceae_Shimwellia_NA	Bacteria_Firmicutes_Clostridia_Lachnospirales_Lachnospiraceae_Tyzzerella_NA.2	Bacteria_Desulfobacterota_Desulfovibrionia_Desulfovibrionales_Desulfovibrionaceae_Desulfovibrio_NA.75	Bacteria_Actinobacteriota_Actinobacteria_Micrococcales_Micrococcaceae_Kocuria_NA	Bacteria_Desulfobacterota_Desulfovibrionia_Desulfovibrionales_Desulfovibrionaceae_Desulfovibrio_NA.108	Bacteria_Desulfobacterota_Desulfovibrionia_Desulfovibrionales_Desulfovibrionaceae_Desulfovibrio_NA.193	Bacteria_Patescibacteria_Gracilibacteria_JGI0000069.P22_NA_NA_NA.39	Bacteria_Firmicutes_Clostridia_NA_NA_NA_NA.172	Bacteria_Firmicutes_Clostridia_Lachnospirales_Lachnospiraceae_NA_NA.55	Bacteria_Firmicutes_Clostridia_Lachnospirales_Lachnospiraceae_Tyzzerella_NA.49	Bacteria_Bacteroidota_Bacteroidia_Bacteroidales_Bacteroidaceae_Bacteroides_NA.32	Bacteria_Firmicutes_Clostridia_Oscillospirales_NA_NA_NA.13	Bacteria_Firmicutes_Clostridia_Peptostreptococcales.Tissierellales_Anaerococcus_NA_NA	Bacteria_Firmicutes_Clostridia_Oscillospirales_UCG.010_NA_NA.17	Bacteria_Cyanobacteria_Vampirivibrionia_Gastranaerophilales_NA_NA_NA.11	Bacteria_Firmicutes_Clostridia_ClostridiaUCG.014_NA_NA_NA.76
Bacteria_Bacteroidota_Bacteroidia_Bacteroidales_Marinifilaceae_Odoribacter_NA.1	Bacteria_Bacteroidota_Bacteroidia_Bacteroidales_M2PB4.65termitegroup_NA_NA.6	Bacteria_Firmicutes_Negativicutes_Acidaminococcales_Acidaminococcaceae_Phascolarctobacterium_faecium	Bacteria_Desulfobacterota_Desulfuromonadia_Bradymonadales_NA_NA_NA	Bacteria_Planctomycetota_Planctomycetes_Pirellulales_Pirellulaceae_Termiteplanctomycetecluster_NA.12	Bacteria_Bacteroidota_Bacteroidia_Bacteroidales_Tannerellaceae_NA_NA.13	Bacteria_Planctomycetota_Planctomycetes_Pirellulales_Pirellulaceae_Termiteplanctomycetecluster_NA.49	Bacteria_Proteobacteria_Gammaproteobacteria_Burkholderiales_Comamonadaceae_Aquabacterium_NA.4	Bacteria_Desulfobacterota_Desulfovibrionia_Desulfovibrionales_Desulfovibrionaceae_Desulfovibrio_NA.216	Bacteria_Firmicutes_Clostridia_Christensenellales_Christensenellaceae_ChristensenellaceaeR.7group_NA.210	Bacteria_Planctomycetota_Planctomycetes_Pirellulales_Pirellulaceae_Termiteplanctomycetecluster_NA.15	Bacteria_Desulfobacterota_Desulfovibrionia_Desulfovibrionales_Desulfovibrionaceae_Desulfovibrio_NA.206	Bacteria_Firmicutes_Clostridia_Peptostreptococcales.Tissierellales_Anaerovoracaceae_NA_NA.38	Bacteria_Firmicutes_Clostridia_Oscillospirales_Ruminococcaceae_NA_NA.229	Bacteria_Verrucomicrobiota_Verrucomicrobiae_NA_NA_NA_NA.2	Bacteria_Planctomycetota_vadinHA49_NA_NA_NA_NA.70
Bacteria_Bacteroidota_Bacteroidia_Bacteroidales_Bacteroidaceae_Bacteroides_NA.2	Bacteria_Firmicutes_Clostridia_ClostridiavadinBB60group_NA_NA_NA	Bacteria_Firmicutes_Clostridia_Christensenellales_Christensenellaceae_ChristensenellaceaeR.7group_NA.51	Bacteria_Bacteroidota_Bacteroidia_Bacteroidales_Dysgonomonadaceae_CandidatusSymbiothrix_NA.4	Bacteria_Firmicutes_Bacilli_Lactobacillales_Enterococcaceae_Enterococcus_NA.4	Bacteria_Firmicutes_Clostridia_Christensenellales_Christensenellaceae_ChristensenellaceaeR.7group_NA.204	Bacteria_Bacteroidota_Bacteroidia_Bacteroidales_Rikenellaceae_Alistipes_NA.98		Bacteria_Firmicutes_Clostridia_Lachnospirales_Lachnospiraceae_Tyzzerella_NA.57	Bacteria_Firmicutes_Clostridia_Christensenellales_Christensenellaceae_NA_NA.67	Bacteria_Planctomycetota_Planctomycetes_Pirellulales_Pirellulaceae_Termiteplanctomycetecluster_NA.17	Bacteria_Desulfobacterota_Desulfovibrionia_Desulfovibrionales_Desulfovibrionaceae_Desulfovibrio_NA.209	Bacteria_Elusimicrobiota_Elusimicrobia_Elusimicrobiales_Elusimicrobiaceae_Elusimicrobium_NA.15	Bacteria_Firmicutes_Clostridia_Christensenellales_Christensenellaceae_NA_NA.86	Bacteria_Firmicutes_Clostridia_Christensenellales_Christensenellaceae_ChristensenellaceaeR.7group_NA.277	Bacteria_Firmicutes_Clostridia_Oscillospirales_Ruminococcaceae_NA_NA.231
Bacteria_Bacteroidota_Bacteroidia_Bacteroidales_PeH15_NA_NA	Bacteria_Bacteroidota_Bacteroidia_Bacteroidales_Rikenellaceae_Alistipes_NA.11	Bacteria_Firmicutes_Clostridia_Oscillospirales_Hydrogenoanaerobacterium_NA_NA.2	Bacteria_Proteobacteria_Gammaproteobacteria_Burkholderiales_Nitrosomonadaceae_Nitrosomonas_NA	Bacteria_Firmicutes_Clostridia_Oscillospirales_Oscillospiraceae_Colidextribacter_NA.8	Bacteria_Firmicutes_Bacilli_RF39_NA_NA_NA.69	Bacteria_Firmicutes_Bacilli_RF39_NA_NA_NA.161		Bacteria_Bacteroidota_Bacteroidia_Bacteroidales_Bacteroidaceae_Bacteroides_NA.42	Bacteria_Firmicutes_Clostridia_Oscillospirales_Ruminococcaceae_IncertaeSedis_NA.12	Bacteria_Bacteroidota_Bacteroidia_Bacteroidales_Bacteroidaceae_Bacteroides_NA.35	Bacteria_Firmicutes_Clostridia_Christensenellales_Christensenellaceae_ChristensenellaceaeR.7group_NA.227	Bacteria_Rs.K70termitegroup_NA_NA_NA_NA_NA.12	Bacteria_Firmicutes_Clostridia_Oscillospirales_Oscillospiraceae_Papillibacter_NA.5	Bacteria_Firmicutes_Clostridia_Oscillospirales_Ruminococcaceae_NA_NA.274	Bacteria_Proteobacteria_Alphaproteobacteria_Acetobacterales_Acetobacteraceae_Roseomonas_NA
Bacteria_Bacteroidota_Bacteroidia_Bacteroidales_Tannerellaceae_Parabacteroides_NA.1	Bacteria_Firmicutes_Clostridia_Christensenellales_Christensenellaceae_ChristensenellaceaeR.7group_NA.11	Bacteria_Bacteroidota_Bacteroidia_Bacteroidales_Dysgonomonadaceae_Dysgonomonas_NA.23	Bacteria_Firmicutes_Clostridia_NA_NA_NA_NA.19	Bacteria_Firmicutes_Clostridia_Lachnospirales_Lachnospiraceae_Tyzzerella_NA.27	Bacteria_Proteobacteria_Alphaproteobacteria_Rhodospirillales_NA_NA_NA.58	Bacteria_Firmicutes_Clostridia_NA_NA_NA_NA.100		Bacteria_Bacteroidota_Bacteroidia_Bacteroidales_Bacteroidaceae_Bacteroides_NA.43	Bacteria_Bacteroidota_Bacteroidia_Bacteroidales_Bacteroidaceae_Bacteroides_vulgatus	Bacteria_Firmicutes_Clostridia_Oscillospirales_Ruminococcaceae_UCG.001_NA.2	Bacteria_Firmicutes_Clostridia_Lachnospirales_Lachnospiraceae_Tyzzerella_NA.55	Bacteria_Firmicutes_Clostridia_Lachnospirales_Lachnospiraceae_Tyzzerella_NA.58	Bacteria_Bacteroidota_Bacteroidia_Bacteroidales_Dysgonomonadaceae_Dysgonomonas_NA.42	Bacteria_Firmicutes_Clostridia_Oscillospirales_UCG.010_NA_NA.24	Bacteria_Firmicutes_Clostridia_Oscillospirales_Ruminococcaceae_CandidatusSoleaferrea_NA.96
Bacteria_Desulfobacterota_Desulfobacteria_Desulfobacterales_Desulfobacteraceae_Desulfobotulus_NA	Bacteria_Firmicutes_Clostridia_Christensenellales_Christensenellaceae_ChristensenellaceaeR.7group_NA.12	Bacteria_Firmicutes_Clostridia_Christensenellales_Christensenellaceae_ChristensenellaceaeR.7group_NA.60	Bacteria_NA_NA_NA_NA_NA_NA.4	Bacteria_Firmicutes_Clostridia_Christensenellales_Christensenellaceae_ChristensenellaceaeR.7group_NA.132	Bacteria_Planctomycetota_vadinHA49_NA_NA_NA_NA.56	Bacteria_Firmicutes_Bacilli_RF39_NA_NA_NA.174		Bacteria_Desulfobacterota_Desulfovibrionia_Desulfovibrionales_Desulfovibrionaceae_Desulfovibrio_NA.233	Bacteria_Firmicutes_Clostridia_Christensenellales_Christensenellaceae_ChristensenellaceaeR.7group_NA.212	Bacteria_Firmicutes_Clostridia_Christensenellales_Christensenellaceae_ChristensenellaceaeR.7group_NA.135	Bacteria_Patescibacteria_Gracilibacteria_JGI0000069.P22_NA_NA_NA.28	Bacteria_Firmicutes_Clostridia_Oscillospirales_Ruminococcaceae_NA_NA.230	Bacteria_Firmicutes_Clostridia_NA_NA_NA_NA.74	Bacteria_Firmicutes_Clostridia_Christensenellales_Christensenellaceae_ChristensenellaceaeR.7group_NA.278	Bacteria_Firmicutes_Clostridia_ClostridiaUCG.014_NA_NA_NA.81
Bacteria_Bacteroidota_Bacteroidia_Bacteroidales_Bacteroidaceae_Bacteroides_NA.3	Bacteria_Bacteroidota_Bacteroidia_Bacteroidales_Rikenellaceae_Alistipes_NA.13	Bacteria_Elusimicrobiota_Endomicrobia_Endomicrobiales_Endomicrobiaceae_Endomicrobium_NA.4	Bacteria_Firmicutes_Bacilli_Erysipelotrichales_Erysipelatoclostridiaceae_UCG.004_NA.8	Bacteria_Desulfobacterota_Desulfovibrionia_Desulfovibrionales_Desulfovibrionaceae_Desulfovibrio_NA.147	Bacteria_Firmicutes_Clostridia_Christensenellales_Christensenellaceae_NA_NA.69	Bacteria_Firmicutes_Clostridia_ClostridiavadinBB60group_NA_NA_NA.63		Bacteria_Bacteroidota_Bacteroidia_Bacteroidales_Rikenellaceae_Alistipes_NA.92	Bacteria_Firmicutes_Clostridia_Oscillospirales_Ruminococcaceae_NA_NA.190	Bacteria_Firmicutes_Clostridia_Christensenellales_Christensenellaceae_ChristensenellaceaeR.7group_NA.138	Bacteria_Proteobacteria_Gammaproteobacteria_Burkholderiales_Methylophilaceae_CandidatusMethylopumilus_NA	Bacteria_Firmicutes_Clostridia_Oscillospirales_Ruminococcaceae_CandidatusSoleaferrea_NA.88	Bacteria_Firmicutes_Clostridia_Lachnospirales_Lachnospiraceae_Lachnoclostridium_NA.11	Bacteria_Proteobacteria_Alphaproteobacteria_Rhodospirillales_NA_NA_NA.117	Bacteria_Cyanobacteria_Vampirivibrionia_Gastranaerophilales_NA_NA_NA.8
Bacteria_Firmicutes_Bacilli_Lactobacillales_Lactobacillaceae_Lactobacillus_dextrinicus	Bacteria_Verrucomicrobiota_Verrucomicrobiae_LD1.PB3_NA_NA_NA.1	Bacteria_Bacteroidota_Bacteroidia_Bacteroidales_Tannerellaceae_Tannerella_NA.3	Bacteria_Proteobacteria_Alphaproteobacteria_Rhodospirillales_NA_NA_NA.21	Bacteria_Firmicutes_Clostridia_Lachnospirales_Lachnospiraceae_NA_NA.32	Bacteria_Firmicutes_Bacilli_RF39_NA_NA_NA.84	Bacteria_Proteobacteria_Alphaproteobacteria_Rhodospirillales_NA_NA_NA.149		Bacteria_Firmicutes_Clostridia_Lachnospirales_Lachnospiraceae_NA_NA.57	Bacteria_Actinobacteriota_Coriobacteriia_Coriobacteriales_CoriobacterialesIncertaeSedis_Raoultibacter_NA.14	Bacteria_Firmicutes_Bacilli_RF39_NA_NA_NA.28	Bacteria_Firmicutes_Clostridia_Christensenellales_Christensenellaceae_NA_NA.84	Bacteria_Bacteroidota_Bacteroidia_Bacteroidales_Paludibacteraceae_Paludibacter_NA.12	Bacteria_Proteobacteria_Alphaproteobacteria_Rhodospirillales_NA_NA_NA.97	Bacteria_Rs.K70termitegroup_NA_NA_NA_NA_NA.14	Bacteria_Firmicutes_Clostridia_Christensenellales_Christensenellaceae_NA_NA.93
Bacteria_Bacteroidota_Bacteroidia_Bacteroidales_CR.115_NA_NA	Bacteria_Bacteroidota_Bacteroidia_Bacteroidales_M2PB4.65termitegroup_NA_NA.7	Bacteria_Firmicutes_Clostridia_Peptostreptococcales.Tissierellales_Gallicola_NA_NA	Bacteria_Firmicutes_Clostridia_Christensenellales_Christensenellaceae_ChristensenellaceaeR.7group_NA.118	Bacteria_Firmicutes_Clostridia_Oscillospirales_Ruminococcaceae_CandidatusSoleaferrea_NA.37	Bacteria_Firmicutes_Clostridia_Christensenellales_Christensenellaceae_ChristensenellaceaeR.7group_NA.223	Bacteria_Firmicutes_Clostridia_Oscillospirales_Ruminococcaceae_CandidatusSoleaferrea_NA.153		Bacteria_Desulfobacterota_Desulfovibrionia_Desulfovibrionales_Desulfovibrionaceae_Desulfovibrio_NA.239	Bacteria_Firmicutes_Clostridia_Christensenellales_Christensenellaceae_ChristensenellaceaeR.7group_NA.220	Bacteria_Firmicutes_Clostridia_ClostridiaUCG.014_NA_NA_NA.17	Bacteria_Firmicutes_Bacilli_RF39_NA_NA_NA.102	Bacteria_Firmicutes_Clostridia_Peptostreptococcales.Tissierellales_Anaerococcus_NA_NA.1	Bacteria_Desulfobacterota_Desulfovibrionia_Desulfovibrionales_Desulfovibrionaceae_Desulfovibrio_NA.242	Bacteria_Firmicutes_Clostridia_Oscillospirales_Ruminococcaceae_IncertaeSedis_NA.16	Bacteria_Firmicutes_Clostridia_Oscillospirales_Ruminococcaceae_NA_NA.243
Bacteria_Firmicutes_Clostridia_Peptostreptococcales.Tissierellales_Peptostreptococcaceae_Romboutsia_NA	Bacteria_Firmicutes_Clostridia_Oscillospirales_Butyricicoccaceae_UCG.009_NA.3	Bacteria_Firmicutes_Clostridia_Oscillospirales_Ruminococcaceae_NA_NA.58	Bacteria_Bacteroidota_Bacteroidia_Bacteroidales_Marinilabiliaceae_NA_NA.8	Bacteria_Firmicutes_Bacilli_Acholeplasmatales_Acholeplasmataceae_Acholeplasma_NA.16	Bacteria_Patescibacteria_Gracilibacteria_JGI0000069.P22_NA_NA_NA.26	Bacteria_Firmicutes_Bacilli_Exiguobacterales_Exiguobacteraceae_Exiguobacterium_NA.1		Bacteria_Proteobacteria_Alphaproteobacteria_NA_NA_NA_NA.33	Bacteria_Firmicutes_Clostridia_Peptococcales_Peptococcaceae_NA_NA.37	Bacteria_Firmicutes_Clostridia_ClostridiaUCG.014_NA_NA_NA.18	Bacteria_Firmicutes_Bacilli_RF39_NA_NA_NA.104	Bacteria_Firmicutes_Bacilli_RF39_NA_NA_NA.126	Bacteria_Firmicutes_Clostridia_ClostridiaUCG.014_NA_NA_NA.87	Bacteria_Firmicutes_Clostridia_Oscillospirales_Ruminococcaceae_Angelakisella_NA.1	Bacteria_Firmicutes_Clostridia_Christensenellales_Christensenellaceae_ChristensenellaceaeR.7group_NA.256
Bacteria_Bacteroidota_Bacteroidia_Bacteroidales_M2PB4.65termitegroup_NA_NA	Bacteria_Firmicutes_Clostridia_Oscillospirales_Ruminococcaceae_NA_NA.12	Bacteria_Bacteroidota_Bacteroidia_Bacteroidales_Tannerellaceae_Parabacteroides_NA.28	Bacteria_Proteobacteria_Alphaproteobacteria_Rhodospirillales_NA_NA_NA.23	Bacteria_Firmicutes_Clostridia_Oscillospirales_Ruminococcaceae_NA_NA.117	Bacteria_Firmicutes_Clostridia_Oscillospirales_Ruminococcaceae_NA_NA.203	Bacteria_Proteobacteria_Alphaproteobacteria_Rhizobiales_Hyphomicrobiaceae_Hyphomicrobium_denitrificans		Bacteria_Firmicutes_Bacilli_Lactobacillales_NA_NA_NA.3	Bacteria_Firmicutes_Clostridia_Oscillospirales_Ruminococcaceae_CandidatusSoleaferrea_NA.76	Bacteria_Desulfobacterota_Desulfovibrionia_Desulfovibrionales_Desulfovibrionaceae_Desulfovibrio_NA.156	Bacteria_Firmicutes_Clostridia_Oscillospirales_Butyricicoccaceae_UCG.009_NA.29	Bacteria_Firmicutes_Clostridia_Oscillospirales_Ruminococcaceae_CandidatusSoleaferrea_NA.112	Bacteria_Firmicutes_Bacilli_Lactobacillales_Lactobacillaceae_Lactobacillus_iners	Bacteria_Actinobacteriota_Actinobacteria_Corynebacteriales_Corynebacteriaceae_Corynebacterium_NA.5	Bacteria_Firmicutes_Bacilli_RF39_NA_NA_NA.123
Bacteria_Bacteroidota_Bacteroidia_Bacteroidales_Rikenellaceae_Alistipes_NA	Bacteria_Bacteroidota_Bacteroidia_Bacteroidales_Tannerellaceae_Parabacteroides_NA.18	Bacteria_Proteobacteria_Alphaproteobacteria_NA_NA_NA_NA.2	Bacteria_Firmicutes_Clostridia_Peptostreptococcales.Tissierellales_Anaerovoracaceae_NA_NA.23	Bacteria_Firmicutes_NA_NA_NA_NA_NA.10	Bacteria_Firmicutes_Clostridia_Peptostreptococcales.Tissierellales_Anaerovoracaceae_Anaerovorax_NA.4			Bacteria_Bacteroidota_Bacteroidia_Bacteroidales_Bacteroidaceae_Bacteroides_NA.44	Bacteria_Firmicutes_Clostridia_Christensenellales_Christensenellaceae_ChristensenellaceaeR.7group_NA.224	Bacteria_Proteobacteria_Alphaproteobacteria_Rhodospirillales_NA_NA_NA.34	Bacteria_Desulfobacterota_Desulfovibrionia_Desulfovibrionales_Desulfovibrionaceae_Desulfovibrio_NA.231	Bacteria_Proteobacteria_Gammaproteobacteria_Burkholderiales_Comamonadaceae_Tepidimonas_NA	Bacteria_Firmicutes_Clostridia_ClostridiavadinBB60group_NA_NA_NA.51	Bacteria_Actinobacteriota_Actinobacteria_Corynebacteriales_Corynebacteriaceae_Corynebacterium_kroppenstedtii	Bacteria_Firmicutes_Clostridia_Christensenellales_Christensenellaceae_ChristensenellaceaeR.7group_NA.263
Bacteria_Firmicutes_Clostridia_Clostridiales_Clostridiaceae_NA_NA	Bacteria_Firmicutes_Bacilli_Erysipelotrichales_Erysipelatoclostridiaceae_Erysipelatoclostridium_NA.5	Bacteria_Planctomycetota_vadinHA49_NA_NA_NA_NA.14	Bacteria_Firmicutes_Clostridia_Oscillospirales_Ruminococcaceae_NA_NA.106	Bacteria_Firmicutes_Bacilli_RF39_NA_NA_NA.45	Bacteria_Proteobacteria_Alphaproteobacteria_NA_NA_NA_NA.23			Bacteria_Firmicutes_Clostridia_Lachnospirales_Lachnospiraceae_NA_NA.62	Bacteria_Proteobacteria_Gammaproteobacteria_Pseudomonadales_Moraxellaceae_Acinetobacter_NA.1	Bacteria_Firmicutes_Clostridia_Monoglobales_Monoglobaceae_Monoglobus_NA.2	Bacteria_Desulfobacterota_Desulfovibrionia_Desulfovibrionales_Desulfovibrionaceae_Desulfovibrio_NA.232	Bacteria_Firmicutes_Clostridia_NA_NA_NA_NA.86	Bacteria_Firmicutes_Bacilli_Lactobacillales_Vagococcaceae_Vagococcus_NA	Bacteria_Desulfobacterota_Desulfovibrionia_Desulfovibrionales_Desulfovibrionaceae_Desulfovibrio_NA.265	Bacteria_Firmicutes_Clostridia_Oscillospirales_Ruminococcaceae_NA_NA.258
Bacteria_Firmicutes_Bacilli_Lactobacillales_Enterococcaceae_Enterococcus_NA.1	Bacteria_Firmicutes_Clostridia_Oscillospirales_Oscillospiraceae_Intestinimonas_NA.2	Bacteria_Planctomycetota_Planctomycetes_Pirellulales_Pirellulaceae_Termiteplanctomycetecluster_NA.8	Bacteria_Firmicutes_Clostridia_Oscillospirales_Ruminococcaceae_CandidatusSoleaferrea_NA.34	Bacteria_Bacteroidota_Bacteroidia_Bacteroidales_Rikenellaceae_Alistipes_NA.64	Bacteria_Elusimicrobiota_Endomicrobia_Endomicrobiales_Endomicrobiaceae_Endomicrobium_NA.14			Bacteria_Proteobacteria_Gammaproteobacteria_Enterobacterales_Morganellaceae_Proteus_NA	Bacteria_Firmicutes_Clostridia_Oscillospirales_Ruminococcaceae_CandidatusSoleaferrea_NA.80	Bacteria_Bacteroidota_Bacteroidia_Bacteroidales_Rikenellaceae_Alistipes_NA.65	Bacteria_Firmicutes_Clostridia_Christensenellales_Christensenellaceae_ChristensenellaceaeR.7group_NA.252	Bacteria_Desulfobacterota_Desulfarculia_Desulfarculales_NA_NA_NA.7	Bacteria_Proteobacteria_Alphaproteobacteria_NA_NA_NA_NA.36	Bacteria_Bacteroidota_Bacteroidia_Sphingobacteriales_Sphingobacteriaceae_Pedobacter_lotistagni	Bacteria_Firmicutes_Clostridia_Oscillospirales_Ruminococcaceae_NA_NA.263
Bacteria_Bacteroidota_Bacteroidia_Bacteroidales_Tannerellaceae_Parabacteroides_NA.2	Bacteria_Firmicutes_Clostridia_Christensenellales_Christensenellaceae_ChristensenellaceaeR.7group_NA.16	Bacteria_Bacteroidota_Bacteroidia_Bacteroidales_Rikenellaceae_Alistipes_NA.41	Bacteria_Cyanobacteria_Vampirivibrionia_Gastranaerophilales_NA_NA_NA	Bacteria_Elusimicrobiota_Elusimicrobia_Elusimicrobiales_Elusimicrobiaceae_Elusimicrobium_NA.9	Bacteria_Firmicutes_Clostridia_Oscillospirales_Ruminococcaceae_Anaerotruncus_NA.3			Bacteria_Firmicutes_Clostridia_NA_NA_NA_NA.89	Bacteria_Firmicutes_Clostridia_Oscillospirales_Ruminococcaceae_NA_NA.212	Bacteria_Firmicutes_Clostridia_Lachnospirales_Lachnospiraceae_Tyzzerella_NA.39	Bacteria_Elusimicrobiota_Endomicrobia_Endomicrobiales_Endomicrobiaceae_Endomicrobium_NA.18	Bacteria_Proteobacteria_Alphaproteobacteria_Sphingomonadales_Sphingomonadaceae_Novosphingobium_NA	Bacteria_Proteobacteria_Gammaproteobacteria_Burkholderiales_Neisseriaceae_Neisseria_NA	Bacteria_Proteobacteria_Gammaproteobacteria_Burkholderiales_Nitrosomonadaceae_Ellin6067_NA	Bacteria_Deferribacterota_Deferribacteres_Deferribacterales_Deferribacteraceae_Mucispirillum_NA.22
Bacteria_Synergistota_Synergistia_Synergistales_Synergistaceae_NA_NA	Bacteria_Firmicutes_Clostridia_Lachnospirales_Lachnospiraceae_Tyzzerella_NA.5	Bacteria_Firmicutes_Clostridia_Oscillospirales_Ruminococcaceae_NA_NA.67	Bacteria_Proteobacteria_Alphaproteobacteria_Rhodospirillales_NA_NA_NA.28	Bacteria_Firmicutes_Clostridia_Lachnospirales_Lachnospiraceae_NA_NA.41	Bacteria_Firmicutes_Clostridia_Oscillospirales_Ruminococcaceae_NA_NA.220			Bacteria_Fusobacteriota_Fusobacteriia_Fusobacteriales_Fusobacteriaceae_Fusobacterium_NA.1	Bacteria_Firmicutes_Clostridia_Christensenellales_Christensenellaceae_ChristensenellaceaeR.7group_NA.238	Bacteria_Firmicutes_Bacilli_Acholeplasmatales_Acholeplasmataceae_Acholeplasma_NA.17	Bacteria_Bdellovibrionota_Bdellovibrionia_Bacteriovoracales_Bacteriovoracaceae_Peredibacter_NA.6	Bacteria_Firmicutes_Bacilli_RF39_NA_NA_NA.149	Bacteria_Firmicutes_Clostridia_Christensenellales_Christensenellaceae_ChristensenellaceaeR.7group_NA.270	Bacteria_Synergistota_Synergistia_Synergistales_Synergistaceae_CandidatusTammella_NA.25	Bacteria_Firmicutes_Bacilli_RF39_NA_NA_NA.144
Bacteria_Bacteroidota_Bacteroidia_Bacteroidales_Marinifilaceae_Sanguibacteroides_NA.1	Bacteria_Bacteroidota_Bacteroidia_Bacteroidales_Dysgonomonadaceae_NA_NA.15	Bacteria_Firmicutes_Clostridia_Christensenellales_Christensenellaceae_ChristensenellaceaeR.7group_NA.91	Bacteria_Firmicutes_Clostridia_Oscillospirales_Ruminococcaceae_CandidatusSoleaferrea_NA.35	Bacteria_Desulfobacterota_Desulfovibrionia_Desulfovibrionales_Desulfovibrionaceae_Desulfovibrio_NA.180	Bacteria_Firmicutes_NA_NA_NA_NA_NA.16			Bacteria_Firmicutes_Clostridia_Christensenellales_Christensenellaceae_NA_NA.109	Bacteria_Firmicutes_Clostridia_Oscillospirales_Oscillospiraceae_NA_NA.41	Bacteria_Firmicutes_Clostridia_ClostridiaUCG.014_NA_NA_NA.27	Bacteria_Proteobacteria_Alphaproteobacteria_Rhizobiales_Beijerinckiaceae_Methylobacterium.Methylorubrum_NA.3	Bacteria_Desulfobacterota_Desulfovibrionia_Desulfovibrionales_Desulfovibrionaceae_Desulfovibrio_NA.254	Bacteria_Deferribacterota_Deferribacteres_Deferribacterales_Deferribacteraceae_Mucispirillum_NA.23	Bacteria_Proteobacteria_Gammaproteobacteria_Xanthomonadales_Xanthomonadaceae_Stenotrophomonas_maltophilia	Bacteria_Firmicutes_Bacilli_RF39_NA_NA_NA.146
Bacteria_Firmicutes_Clostridia_Lachnospirales_Lachnospiraceae_NA_NA	Bacteria_Bacteroidota_Bacteroidia_Bacteroidales_Dysgonomonadaceae_NA_NA.16	Bacteria_Desulfobacterota_Desulfovibrionia_Desulfovibrionales_Desulfovibrionaceae_Desulfovibrio_NA.111	Bacteria_Bacteroidota_Bacteroidia_Bacteroidales_Rikenellaceae_Alistipes_NA.56	Bacteria_Firmicutes_Clostridia_Oscillospirales_Oscillospiraceae_NA_NA.32	Bacteria_Desulfobacterota_Desulfovibrionia_Desulfovibrionales_Desulfovibrionaceae_Desulfovibrio_NA.225			Bacteria_Firmicutes_Clostridia_Christensenellales_Christensenellaceae_NA_NA.115	Bacteria_Planctomycetota_Planctomycetes_Pirellulales_Pirellulaceae_Termiteplanctomycetecluster_NA.42	Bacteria_Firmicutes_Clostridia_NA_NA_NA_NA.34	Bacteria_Firmicutes_Bacilli_RF39_NA_NA_NA.117	Bacteria_Patescibacteria_Saccharimonadia_Saccharimonadales_Saccharimonadaceae_CandidatusSaccharimonas_NA	Bacteria_Firmicutes_Clostridia_Christensenellales_Christensenellaceae_ChristensenellaceaeR.7group_NA.272	Bacteria_SAR324cladeMarinegroupB_NA_NA_NA_NA_NA.6	Bacteria_Firmicutes_Clostridia_Oscillospirales_Ruminococcaceae_NA_NA.272
Bacteria_Desulfobacterota_Desulfovibrionia_Desulfovibrionales_Desulfovibrionaceae_Desulfovibrio_NA	Bacteria_Firmicutes_Clostridia_Oscillospirales_Ruminococcaceae_CandidatusSoleaferrea_NA.1	Bacteria_Synergistota_Synergistia_Synergistales_Synergistaceae_CandidatusTammella_NA.11	Bacteria_Firmicutes_Clostridia_Lachnospirales_Lachnospiraceae_NA_NA.33	Bacteria_Firmicutes_Clostridia_ClostridiaUCG.014_NA_NA_NA.46	Bacteria_Proteobacteria_Alphaproteobacteria_Rhodospirillales_NA_NA_NA.85			Bacteria_Firmicutes_Clostridia_ClostridiaUCG.014_NA_NA_NA.99	Bacteria_Firmicutes_Clostridia_Oscillospirales_Ruminococcaceae_NA_NA.216	Bacteria_Elusimicrobiota_Endomicrobia_Endomicrobiales_Endomicrobiaceae_Endomicrobium_NA.7	Bacteria_Firmicutes_Clostridia_Oscillospirales_Ruminococcaceae_NA_NA.249	Bacteria_Firmicutes_Clostridia_Lachnospirales_Lachnospiraceae_Tyzzerella_NA.67	Bacteria_Proteobacteria_Alphaproteobacteria_Rhodospirillales_NA_NA_NA.106	Bacteria_Actinobacteriota_Actinobacteria_Frankiales_Geodermatophilaceae_Blastococcus_NA	Bacteria_Firmicutes_Clostridia_NA_NA_NA_NA.95
Bacteria_Firmicutes_Bacilli_Erysipelotrichales_Erysipelotrichaceae_Breznakia_blatticola	Bacteria_Desulfobacterota_Desulfovibrionia_Desulfovibrionales_Desulfovibrionaceae_Desulfovibrio_NA.44	Bacteria_Bacteroidota_Bacteroidia_Bacteroidales_Rikenellaceae_RikenellaceaeRC9gutgroup_NA.11	Bacteria_Firmicutes_Clostridia_Lachnospirales_Lachnospiraceae_LachnospiraceaeUCG.010_NA.2	Bacteria_Desulfobacterota_Desulfovibrionia_Desulfovibrionales_Desulfovibrionaceae_Desulfovibrio_NA.195	Bacteria_Cyanobacteria_Vampirivibrionia_Gastranaerophilales_NA_NA_NA.5			Bacteria_Firmicutes_Clostridia_ClostridiaUCG.014_NA_NA_NA.100	Bacteria_Firmicutes_Clostridia_Oscillospirales_Ruminococcaceae_Faecalibacterium_NA	Bacteria_Firmicutes_Clostridia_Christensenellales_Christensenellaceae_ChristensenellaceaeR.7group_NA.171	Bacteria_Firmicutes_Clostridia_NA_NA_NA_NA.82	Bacteria_Actinobacteriota_Actinobacteria_Corynebacteriales_Corynebacteriaceae_Corynebacterium_NA.4	Bacteria_Proteobacteria_Alphaproteobacteria_NA_NA_NA_NA.37	Bacteria_Proteobacteria_Gammaproteobacteria_Burkholderiales_Neisseriaceae_Neisseria_NA.1	Bacteria_Firmicutes_Clostridia_Oscillospirales_Ruminococcaceae_IncertaeSedis_NA.17
Bacteria_Bacteroidota_Bacteroidia_Bacteroidales_Rikenellaceae_Alistipes_NA.1	Bacteria_Firmicutes_Clostridia_Oscillospirales_Ruminococcaceae_NA_NA.17	Bacteria_Planctomycetota_vadinHA49_NA_NA_NA_NA.22	Bacteria_Proteobacteria_Alphaproteobacteria_Rhodospirillales_NA_NA_NA.33	Bacteria_Planctomycetota_vadinHA49_NA_NA_NA_NA.50	Bacteria_Firmicutes_Clostridia_Oscillospirales_Ruminococcaceae_CandidatusSoleaferrea_NA.86			Bacteria_Firmicutes_Clostridia_Lachnospirales_Lachnospiraceae_NA_NA.63	Bacteria_Firmicutes_Clostridia_Oscillospirales_Oscillospiraceae_NA_NA.43	Bacteria_Firmicutes_Bacilli_Erysipelotrichales_Erysipelotrichaceae_Breznakia_NA.6	Bacteria_Proteobacteria_Gammaproteobacteria_Pseudomonadales_Moraxellaceae_Acinetobacter_NA.4	Bacteria_Firmicutes_Clostridia_Peptostreptococcales.Tissierellales_Peptoniphilus_NA_NA	Bacteria_Firmicutes_Clostridia_Christensenellales_Christensenellaceae_ChristensenellaceaeR.7group_NA.275	Bacteria_Proteobacteria_Gammaproteobacteria_Cellvibrionales_Cellvibrionaceae_Cellvibrio_gandavensis	Bacteria_Firmicutes_Clostridia_Oscillospirales_Ruminococcaceae_CandidatusSoleaferrea_NA.134
Bacteria_Bacteroidota_Bacteroidia_Bacteroidales_Bacteroidaceae_Bacteroides_NA.5	Bacteria_Bacteroidota_Bacteroidia_Bacteroidales_NA_NA_NA.5	Bacteria_Firmicutes_Negativicutes_Acidaminococcales_Acidaminococcaceae_NA_NA.6	Bacteria_Firmicutes_Clostridia_Christensenellales_Christensenellaceae_ChristensenellaceaeR.7group_NA.162	Bacteria_Planctomycetota_vadinHA49_NA_NA_NA_NA.53	Bacteria_Firmicutes_Clostridia_Christensenellales_Christensenellaceae_NA_NA.88			Bacteria_Patescibacteria_Saccharimonadia_Saccharimonadales_NA_NA_NA.5	Bacteria_Planctomycetota_vadinHA49_NA_NA_NA_NA.67	Bacteria_Firmicutes_Clostridia_Lachnospirales_Lachnospiraceae_NA_NA.44	Bacteria_Patescibacteria_Gracilibacteria_JGI0000069.P22_NA_NA_NA.36	Bacteria_Bacteroidota_Bacteroidia_Chitinophagales_Chitinophagaceae_Sediminibacterium_NA.1	Bacteria_Bacteroidota_Bacteroidia_Flavobacteriales_Weeksellaceae_Chryseobacterium_hominis	Bacteria_Firmicutes_Bacilli_RsaHf231_NA_NA_NA.6	Bacteria_Firmicutes_Clostridia_ClostridiavadinBB60group_NA_NA_NA.61
Bacteria_Bacteroidota_Bacteroidia_Bacteroidales_Rikenellaceae_Alistipes_NA.2	Bacteria_Firmicutes_Clostridia_ClostridiavadinBB60group_NA_NA_NA.3	Bacteria_Bacteroidota_Bacteroidia_Bacteroidales_Rikenellaceae_Alistipes_NA.49	Bacteria_Firmicutes_Negativicutes_Acidaminococcales_Acidaminococcaceae_NA_NA.8	Bacteria_Chloroflexi_Dehalococcoidia_NA_NA_NA_NA	Bacteria_Firmicutes_Clostridia_Oscillospirales_Ruminococcaceae_Ruminococcus_NA.5			Bacteria_Firmicutes_Clostridia_Peptostreptococcales.Tissierellales_Anaerovoracaceae_NA_NA.44	Bacteria_Planctomycetota_vadinHA49_NA_NA_NA_NA.69	Bacteria_Firmicutes_Clostridia_NA_NA_NA_NA.41	Bacteria_Firmicutes_Clostridia_Oscillospirales_Ruminococcaceae_NA_NA.264	Bacteria_Firmicutes_Clostridia_Lachnospirales_Lachnospiraceae_LachnospiraceaeUCG.010_NA.7	Bacteria_Firmicutes_Clostridia_Christensenellales_Christensenellaceae_NA_NA.111	Bacteria_Proteobacteria_Gammaproteobacteria_Oceanospirillales_Halomonadaceae_Halomonas_NA	Bacteria_Proteobacteria_Gammaproteobacteria_Coxiellales_Coxiellaceae_Coxiella_NA.1
Bacteria_Desulfobacterota_Desulfobacteria_Desulfobacterales_Desulfosarcinaceae_NA_NA	Bacteria_Verrucomicrobiota_Verrucomicrobiae_NA_NA_NA_NA	Bacteria_Synergistota_Synergistia_Synergistales_Synergistaceae_CandidatusTammella_NA.13	Bacteria_Proteobacteria_Alphaproteobacteria_NA_NA_NA_NA.9	Bacteria_Firmicutes_Clostridia_Oscillospirales_UCG.010_NA_NA.14	Bacteria_Bacteroidota_Bacteroidia_NA_NA_NA_NA			Bacteria_Firmicutes_Negativicutes_Acidaminococcales_Acidaminococcaceae_Phascolarctobacterium_NA.1	Bacteria_Desulfobacterota_Desulfovibrionia_Desulfovibrionales_Desulfovibrionaceae_Desulfovibrio_NA.229	Bacteria_Firmicutes_Clostridia_Christensenellales_Christensenellaceae_ChristensenellaceaeR.7group_NA.186	Bacteria_Actinobacteriota_Actinobacteria_Micrococcales_Dermabacteraceae_Brachybacterium_NA	Bacteria_Firmicutes_Clostridia_Oscillospirales_Ruminococcaceae_NA_NA.293	Bacteria_Firmicutes_Clostridia_Christensenellales_Christensenellaceae_NA_NA.112	Bacteria_Acidobacteriota_Vicinamibacteria_Vicinamibacterales_NA_NA_NA	Bacteria_Firmicutes_Clostridia_Christensenellales_Christensenellaceae_NA_NA.134
Bacteria_Desulfobacterota_Desulfobacteria_Desulfobacterales_Desulfosarcinaceae_NA_NA.1	Bacteria_Firmicutes_Clostridia_Christensenellales_Christensenellaceae_ChristensenellaceaeR.7group_NA.21	Bacteria_Firmicutes_Clostridia_Christensenellales_Christensenellaceae_ChristensenellaceaeR.7group_NA.125	Bacteria_NA_NA_NA_NA_NA_NA.7	Bacteria_Firmicutes_Clostridia_ClostridiaUCG.014_NA_NA_NA.63	Bacteria_Firmicutes_Clostridia_NA_NA_NA_NA.76			Bacteria_Firmicutes_Clostridia_Lachnospirales_Lachnospiraceae_NA_NA.67	Bacteria_Bacteroidota_Bacteroidia_Bacteroidales_Paludibacteraceae_NA_NA.21	Bacteria_Firmicutes_Clostridia_NA_NA_NA_NA.44	Bacteria_Firmicutes_Bacilli_RF39_NA_NA_NA.135	Bacteria_Firmicutes_Bacilli_RF39_NA_NA_NA.168	Bacteria_Firmicutes_Clostridia_ClostridiavadinBB60group_NA_NA_NA.58	Bacteria_Firmicutes_Clostridia_Christensenellales_Christensenellaceae_NA_NA.143	Bacteria_Firmicutes_Clostridia_Oscillospirales_Ruminococcaceae_NA_NA.314
Bacteria_Firmicutes_Bacilli_Erysipelotrichales_Erysipelatoclostridiaceae_Erysipelatoclostridium_NA	Bacteria_Firmicutes_Clostridia_Oscillospirales_Ruminococcaceae_CandidatusSoleaferrea_NA.2	Bacteria_Firmicutes_Clostridia_Christensenellales_Christensenellaceae_ChristensenellaceaeR.7group_NA.129	Bacteria_Proteobacteria_Alphaproteobacteria_Rhodospirillales_NA_NA_NA.41		Bacteria_Bacteroidota_Bacteroidia_Bacteroidales_Paludibacteraceae_NA_NA.22			Bacteria_Firmicutes_Clostridia_Christensenellales_Christensenellaceae_NA_NA.132	Bacteria_Firmicutes_Clostridia_Oscillospirales_Ruminococcaceae_NA_NA.228	Bacteria_Planctomycetota_Planctomycetes_Pirellulales_Pirellulaceae_Termiteplanctomycetecluster_NA.35	Bacteria_Firmicutes_Syntrophomonadia_Syntrophomonadales_Syntrophomonadaceae_NA_NA.2	Bacteria_Proteobacteria_Gammaproteobacteria_Pseudomonadales_Moraxellaceae_Psychrobacter_NA	Bacteria_Bacteroidota_Bacteroidia_Bacteroidales_Rikenellaceae_Alistipes_NA.97	Bacteria_Patescibacteria_Saccharimonadia_Saccharimonadales_Saccharimonadaceae_CandidatusSaccharimonas_NA.8	Bacteria_Proteobacteria_Gammaproteobacteria_Burkholderiales_Comamonadaceae_NA_NA.3
Bacteria_Bacteroidota_Bacteroidia_Bacteroidales_Dysgonomonadaceae_NA_NA	Bacteria_Bacteroidota_Bacteroidia_Bacteroidales_Dysgonomonadaceae_Dysgonomonas_NA.13	Bacteria_Firmicutes_Clostridia_Peptococcales_Peptococcaceae_NA_NA.22	Bacteria_Firmicutes_Bacilli_RF39_NA_NA_NA.53		Bacteria_Verrucomicrobiota_Lentisphaeria_Victivallales_Victivallaceae_NA_NA.8			Bacteria_Firmicutes_Clostridia_Oscillospirales_Ruminococcaceae_NA_NA.308	Bacteria_Firmicutes_Clostridia_Oscillospirales_Oscillospiraceae_NA_NA.44	Bacteria_Planctomycetota_vadinHA49_NA_NA_NA_NA.46	Bacteria_Desulfobacterota_Desulfovibrionia_Desulfovibrionales_Desulfovibrionaceae_Desulfovibrio_NA.251	Bacteria_Firmicutes_Clostridia_Christensenellales_Christensenellaceae_ChristensenellaceaeR.7group_NA.289	Bacteria_Desulfobacterota_Desulfovibrionia_Desulfovibrionales_Desulfovibrionaceae_Desulfovibrio_NA.261	Bacteria_Spirochaetota_Spirochaetia_Spirochaetales_Spirochaetaceae_NA_NA.3	Bacteria_Firmicutes_Bacilli_Lactobacillales_Streptococcaceae_Streptococcus_NA.5
Bacteria_Bacteroidota_Bacteroidia_Bacteroidales_Rikenellaceae_RikenellaceaeRC9gutgroup_NA	Bacteria_Firmicutes_Clostridia_ClostridiavadinBB60group_NA_NA_NA.4	Bacteria_Planctomycetota_vadinHA49_NA_NA_NA_NA.25	Bacteria_Bacteroidota_Bacteroidia_Bacteroidales_Dysgonomonadaceae_NA_NA.37		Bacteria_Firmicutes_Clostridia_Peptostreptococcales.Tissierellales_Anaerovoracaceae_NA_NA.41			Bacteria_Firmicutes_Clostridia_NA_NA_NA_NA.113	Bacteria_Firmicutes_Clostridia_Oscillospirales_Ruminococcaceae_NA_NA.232	Bacteria_Actinobacteriota_Coriobacteriia_Coriobacteriales_CoriobacterialesIncertaeSedis_NA_NA.5	Bacteria_Patescibacteria_Gracilibacteria_JGI0000069.P22_NA_NA_NA.42	Bacteria_Actinobacteriota_Actinobacteria_Micrococcales_Microbacteriaceae_Rhodoluna_NA	Bacteria_Planctomycetota_vadinHA49_NA_NA_NA_NA.84	Bacteria_Firmicutes_Clostridia_Christensenellales_Christensenellaceae_ChristensenellaceaeR.7group_NA.309	Bacteria_Proteobacteria_Alphaproteobacteria_Rhizobiales_Rhizobiaceae_Brucella_NA
Bacteria_Bacteroidota_Bacteroidia_Bacteroidales_Rikenellaceae_RikenellaceaeRC9gutgroup_NA.1	Bacteria_Firmicutes_Clostridia_Oscillospirales_Oscillospiraceae_Intestinimonas_NA.3	Bacteria_Firmicutes_Clostridia_Oscillospirales_Ruminococcaceae_NA_NA.98	Bacteria_Deferribacterota_Deferribacteres_Deferribacterales_Deferribacteraceae_Mucispirillum_NA.15		Bacteria_Firmicutes_Clostridia_Oscillospirales_Ruminococcaceae_CandidatusSoleaferrea_NA.98			Bacteria_Synergistota_Synergistia_Synergistales_Synergistaceae_CandidatusTammella_NA.26	Bacteria_Firmicutes_Clostridia_Christensenellales_Christensenellaceae_ChristensenellaceaeR.7group_NA.251	Bacteria_Actinobacteriota_Actinobacteria_Corynebacteriales_Corynebacteriaceae_Corynebacterium_NA	Bacteria_Proteobacteria_NA_NA_NA_NA_NA.4	Bacteria_Proteobacteria_Gammaproteobacteria_Enterobacterales_NA_NA_NA.2	Bacteria_Synergistota_Synergistia_Synergistales_Synergistaceae_CandidatusTammella_NA.23	Bacteria_Proteobacteria_Gammaproteobacteria_Burkholderiales_Comamonadaceae_Xylophilus_NA.2	Bacteria_Firmicutes_Clostridia_Oscillospirales_Ruminococcaceae_NA_NA.342
Bacteria_Bacteroidota_Bacteroidia_Bacteroidales_Paludibacteraceae_Paludibacter_NA	Bacteria_Firmicutes_Clostridia_Oscillospirales_Ruminococcaceae_CandidatusSoleaferrea_NA.3	Bacteria_Firmicutes_Clostridia_ClostridiavadinBB60group_NA_NA_NA.21	Bacteria_Firmicutes_Clostridia_NA_NA_NA_NA.43		Bacteria_Bacteroidota_Bacteroidia_Bacteroidales_Tannerellaceae_Parabacteroides_NA.39			Bacteria_Fusobacteriota_Fusobacteriia_Fusobacteriales_Fusobacteriaceae_Fusobacterium_NA.3	Bacteria_Firmicutes_Clostridia_NA_NA_NA_NA.75	Bacteria_Firmicutes_Clostridia_Christensenellales_Christensenellaceae_ChristensenellaceaeR.7group_NA.198	Bacteria_Firmicutes_Clostridia_ClostridiaUCG.014_NA_NA_NA.96	Bacteria_Firmicutes_Clostridia_Christensenellales_Christensenellaceae_ChristensenellaceaeR.7group_NA.295	Bacteria_Firmicutes_Clostridia_Christensenellales_Christensenellaceae_NA_NA.120	Bacteria_Bacteroidota_Bacteroidia_Chitinophagales_Chitinophagaceae_Taibaiella_NA.1	Bacteria_Proteobacteria_Gammaproteobacteria_Burkholderiales_Comamonadaceae_Polaromonas_NA
Bacteria_Firmicutes_Bacilli_Lactobacillales_Lactobacillaceae_Lactobacillus_NA	Bacteria_Desulfobacterota_Desulfovibrionia_Desulfovibrionales_Desulfovibrionaceae_Desulfovibrio_NA.49	Bacteria_Desulfobacterota_Desulfovibrionia_Desulfovibrionales_Desulfovibrionaceae_Desulfovibrio_NA.139	Bacteria_Firmicutes_Clostridia_Christensenellales_Christensenellaceae_ChristensenellaceaeR.7group_NA.214		Bacteria_Firmicutes_Clostridia_Christensenellales_Christensenellaceae_ChristensenellaceaeR.7group_NA.261			Bacteria_Firmicutes_Clostridia_Oscillospirales_Ruminococcaceae_NA_NA.317	Bacteria_Firmicutes_Clostridia_Oscillospirales_Ruminococcaceae_NA_NA.236	Bacteria_Firmicutes_Clostridia_Christensenellales_Christensenellaceae_ChristensenellaceaeR.7group_NA.199	Bacteria_Proteobacteria_Gammaproteobacteria_Burkholderiales_Oxalobacteraceae_Massilia_NA	Bacteria_Firmicutes_Clostridia_Peptostreptococcales.Tissierellales_Anaerococcus_NA_NA.2	Bacteria_Firmicutes_Clostridia_Oscillospirales_Ruminococcaceae_NA_NA.292	Bacteria_Firmicutes_Clostridia_Lachnospirales_Lachnospiraceae_Tuzzerella_NA.2	Bacteria_Firmicutes_Clostridia_Christensenellales_Christensenellaceae_ChristensenellaceaeR.7group_NA.328
Bacteria_Firmicutes_Bacilli_Lactobacillales_Lactobacillaceae_Lactobacillus_NA.1	Bacteria_Patescibacteria_Gracilibacteria_AbsconditabacterialesSR1_NA_NA_NA.2	Bacteria_Firmicutes_Clostridia_ClostridiavadinBB60group_NA_NA_NA.23			Bacteria_Desulfobacterota_Desulfarculia_Desulfarculales_Desulfarculaceae_NA_NA.1			Bacteria_Bacteroidota_Bacteroidia_Bacteroidales_Tannerellaceae_NA_NA.23	Bacteria_Firmicutes_Clostridia_Oscillospirales_Hydrogenoanaerobacterium_NA_NA.11	Bacteria_Bacteroidota_Bacteroidia_Bacteroidales_Paludibacteraceae_NA_NA.16	Bacteria_Proteobacteria_Alphaproteobacteria_Rhodospirillales_NA_NA_NA.109	Bacteria_Proteobacteria_Gammaproteobacteria_Burkholderiales_Comamonadaceae_NA_NA.2	Bacteria_Firmicutes_Bacilli_RF39_NA_NA_NA.164	Bacteria_Patescibacteria_Microgenomatia_CandidatusPacebacteria_NA_NA_NA.4	Bacteria_Firmicutes_Clostridia_Christensenellales_Christensenellaceae_ChristensenellaceaeR.7group_NA.329
Bacteria_Bacteroidota_Bacteroidia_Bacteroidales_Dysgonomonadaceae_NA_NA.1	Bacteria_Spirochaetota_MVP.15_NA_NA_NA_NA	Bacteria_Firmicutes_Clostridia_Christensenellales_Christensenellaceae_ChristensenellaceaeR.7group_NA.142			Bacteria_Firmicutes_Clostridia_Oscillospirales_Ruminococcaceae_NA_NA.256			Bacteria_Firmicutes_Clostridia_Christensenellales_Christensenellaceae_ChristensenellaceaeR.7group_NA.300	Bacteria_Firmicutes_Clostridia_Christensenellales_Christensenellaceae_NA_NA.95	Bacteria_Planctomycetota_vadinHA49_NA_NA_NA_NA.51	Bacteria_Planctomycetota_vadinHA49_NA_NA_NA_NA.82	Bacteria_Proteobacteria_Gammaproteobacteria_Pseudomonadales_Pseudomonadaceae_Pseudomonas_NA.9	Bacteria_Firmicutes_Clostridia_Lachnospirales_Lachnospiraceae_Tyzzerella_NA.72	Bacteria_Firmicutes_Clostridia_ClostridiavadinBB60group_NA_NA_NA.68	Bacteria_Firmicutes_Bacilli_RsaHf231_NA_NA_NA.7
Bacteria_Bacteroidota_Bacteroidia_Bacteroidales_Rikenellaceae_RikenellaceaeRC9gutgroup_NA.2	Bacteria_Firmicutes_Clostridia_Lachnospirales_Lachnospiraceae_Tyzzerella_NA.6	Bacteria_Proteobacteria_Alphaproteobacteria_Rhodospirillales_NA_NA_NA.27			Bacteria_Actinobacteriota_Actinobacteria_Micrococcales_NA_NA_NA.2			Bacteria_Firmicutes_Clostridia_Oscillospirales_Oscillospiraceae_Colidextribacter_NA.11	Bacteria_Firmicutes_Clostridia_NA_NA_NA_NA.78	Bacteria_Firmicutes_Clostridia_Oscillospirales_Ruminococcaceae_NA_NA.179	Bacteria_Actinobacteriota_Actinobacteria_Micrococcales_Dermabacteraceae_Brachybacterium_NA.1	Bacteria_Firmicutes_Clostridia_Oscillospirales_Ruminococcaceae_NA_NA.311	Bacteria_Proteobacteria_Alphaproteobacteria_NA_NA_NA_NA.40	Bacteria_NA_NA_NA_NA_NA_NA.18	Bacteria_Planctomycetota_Planctomycetes_Pirellulales_Pirellulaceae_Termiteplanctomycetecluster_NA.64
Bacteria_Bacteroidota_Bacteroidia_Bacteroidales_NA_NA_NA	Bacteria_Firmicutes_Clostridia_ClostridiaUCG.014_NA_NA_NA	Bacteria_Bacteroidota_Bacteroidia_Bacteroidales_Rikenellaceae_Alistipes_NA.54			Bacteria_Firmicutes_Bacilli_Lactobacillales_Enterococcaceae_Enterococcus_NA.13			Bacteria_Firmicutes_Negativicutes_Acidaminococcales_Acidaminococcaceae_NA_NA.10	Bacteria_Desulfobacterota_Desulfovibrionia_Desulfovibrionales_Desulfovibrionaceae_Desulfovibrio_NA.244	Bacteria_Firmicutes_Clostridia_ClostridiaUCG.014_NA_NA_NA.50	Bacteria_Proteobacteria_Alphaproteobacteria_Rhodospirillales_NA_NA_NA.115	Bacteria_Firmicutes_Clostridia_Christensenellales_Christensenellaceae_NA_NA.135	Bacteria_Proteobacteria_Gammaproteobacteria_Pseudomonadales_Pseudomonadaceae_Pseudomonas_NA.8	Bacteria_Firmicutes_Clostridia_Lachnospirales_Lachnospiraceae_Tyzzerella_NA.78	Bacteria_Firmicutes_Clostridia_Christensenellales_Christensenellaceae_ChristensenellaceaeR.7group_NA.386
Bacteria_Bacteroidota_Bacteroidia_Bacteroidales_Dysgonomonadaceae_NA_NA.2	Bacteria_Bacteroidota_Bacteroidia_Bacteroidales_PeH15_NA_NA.2	Bacteria_Firmicutes_Clostridia_Oscillospirales_UCG.010_NA_NA.8			Bacteria_Firmicutes_Clostridia_Oscillospirales_Ruminococcaceae_CandidatusSoleaferrea_NA.108			Bacteria_Firmicutes_Clostridia_Lachnospirales_Lachnospiraceae_NA_NA.71	Bacteria_Deferribacterota_Deferribacteres_Deferribacterales_Deferribacteraceae_Mucispirillum_NA.21	Bacteria_Firmicutes_Clostridia_Oscillospirales_Ruminococcaceae_CandidatusSoleaferrea_NA.68	Bacteria_Deferribacterota_Deferribacteres_Deferribacterales_Deferribacteraceae_Mucispirillum_NA.24	Bacteria_Bacteroidota_Bacteroidia_Chitinophagales_Chitinophagaceae_Pseudoflavitalea_NA	Bacteria_Firmicutes_Bacilli_Lactobacillales_Streptococcaceae_Streptococcus_NA.4	Bacteria_Actinobacteriota_Actinobacteria_Micrococcales_Microbacteriaceae_Rhodoluna_NA.1	Bacteria_Actinobacteriota_Actinobacteria_Corynebacteriales_Corynebacteriaceae_Corynebacterium_NA.12
Bacteria_Bacteroidota_Bacteroidia_Bacteroidales_Williamwhitmaniaceae_NA_NA	Bacteria_Desulfobacterota_Desulfobacteria_Desulfobacterales_Desulfosarcinaceae_Desulfosarcina_NA	Bacteria_Firmicutes_Clostridia_Oscillospirales_Butyricicoccaceae_UCG.009_NA.14			Bacteria_Firmicutes_Clostridia_Christensenellales_Christensenellaceae_NA_NA.102			Bacteria_Firmicutes_Clostridia_NA_NA_NA_NA.117	Bacteria_Planctomycetota_Planctomycetes_Pirellulales_Pirellulaceae_Termiteplanctomycetecluster_NA.46	Bacteria_Bacteroidota_Bacteroidia_Bacteroidales_Rikenellaceae_Alistipes_NA.79	Bacteria_Proteobacteria_Gammaproteobacteria_Xanthomonadales_Xanthomonadaceae_Xanthomonas_NA	Bacteria_Firmicutes_Clostridia_Oscillospirales_Ruminococcaceae_NA_NA.325	Bacteria_Patescibacteria_Gracilibacteria_JGI0000069.P22_NA_NA_NA.45	Bacteria_Verrucomicrobiota_Verrucomicrobiae_Opitutales_Puniceicoccaceae_NA_NA.3	Bacteria_Bacteroidota_Bacteroidia_Bacteroidales_BacteroidetesvadinHA17_NA_NA.3
Bacteria_Bacteroidota_Bacteroidia_Bacteroidales_Dysgonomonadaceae_NA_NA.3	Bacteria_Proteobacteria_Alphaproteobacteria_Rhodospirillales_NA_NA_NA.1	Bacteria_Firmicutes_Clostridia_Christensenellales_Christensenellaceae_ChristensenellaceaeR.7group_NA.154			Bacteria_Proteobacteria_Gammaproteobacteria_Pseudomonadales_Moraxellaceae_Acinetobacter_NA.5			Bacteria_Firmicutes_Clostridia_Oscillospirales_Ruminococcaceae_NA_NA.328	Bacteria_Firmicutes_Clostridia_Oscillospirales_Oscillospiraceae_Papillibacter_NA.7	Bacteria_Firmicutes_Clostridia_ClostridiaUCG.014_NA_NA_NA.52	Bacteria_Proteobacteria_Alphaproteobacteria_Rhodospirillales_NA_NA_NA.120	Bacteria_Firmicutes_Clostridia_Peptostreptococcales.Tissierellales_Anaerovoracaceae_NA_NA.48	Bacteria_Actinobacteriota_Actinobacteria_Micrococcales_Micrococcaceae_Rothia_mucilaginosa	Bacteria_Desulfobacterota_Desulfovibrionia_Desulfovibrionales_Desulfovibrionaceae_NA_NA.23
Bacteria_Bacteroidota_Bacteroidia_Bacteroidales_Rikenellaceae_RikenellaceaeRC9gutgroup_NA.3	Bacteria_Firmicutes_Negativicutes_Acidaminococcales_Acidaminococcaceae_NA_NA.4	Bacteria_Firmicutes_Clostridia_Oscillospirales_Eubacteriumcoprostanoligenesgroup_NA_NA.23			Bacteria_Planctomycetota_vadinHA49_NA_NA_NA_NA.75			Bacteria_Firmicutes_Clostridia_Lachnospirales_Lachnospiraceae_NA_NA.73	Bacteria_Firmicutes_Clostridia_Christensenellales_Christensenellaceae_NA_NA.106	Bacteria_Desulfobacterota_Desulfarculia_Desulfarculales_NA_NA_NA.4	Bacteria_Firmicutes_Clostridia_Lachnospirales_Lachnospiraceae_Lachnoclostridium_NA.13	Bacteria_Firmicutes_Clostridia_Lachnospirales_Lachnospiraceae_Lachnoanaerobaculum_NA	Bacteria_Firmicutes_Clostridia_Oscillospirales_Ruminococcaceae_CandidatusSoleaferrea_NA.141	Bacteria_Acidobacteriota_Vicinamibacteria_Vicinamibacterales_Vicinamibacteraceae_NA_NA
Bacteria_Bacteroidota_Bacteroidia_Bacteroidales_Marinilabiliaceae_NA_NA	Bacteria_Firmicutes_Clostridia_Christensenellales_Christensenellaceae_NA_NA.5	Bacteria_Desulfobacterota_Desulfovibrionia_Desulfovibrionales_Desulfovibrionaceae_Desulfovibrio_NA.173			Bacteria_Firmicutes_Bacilli_RF39_NA_NA_NA.139			Bacteria_Firmicutes_Clostridia_Lachnospirales_Lachnospiraceae_NA_NA.74	Bacteria_Bacteroidota_Bacteroidia_Bacteroidales_Tannerellaceae_NA_NA.18	Bacteria_Firmicutes_Clostridia_ClostridiaUCG.014_NA_NA_NA.54	Bacteria_Firmicutes_Clostridia_Christensenellales_Christensenellaceae_NA_NA.124	Bacteria_Proteobacteria_Gammaproteobacteria_Burkholderiales_Oxalobacteraceae_Massilia_NA.2	Bacteria_Firmicutes_Clostridia_Oscillospirales_NA_NA_NA.29	Bacteria_Actinobacteriota_Actinobacteria_Frankiales_Nakamurellaceae_Nakamurella_multipartita
Bacteria_Firmicutes_Clostridia_Christensenellales_Christensenellaceae_ChristensenellaceaeR.7group_NA	Bacteria_Firmicutes_Clostridia_Oscillospirales_UCG.010_NA_NA.2	Bacteria_Desulfobacterota_Desulfovibrionia_Desulfovibrionales_Desulfovibrionaceae_NA_NA.16			Bacteria_Firmicutes_Clostridia_Oscillospirales_UCG.010_NA_NA.22			Bacteria_Firmicutes_Clostridia_NA_NA_NA_NA.121	Bacteria_Firmicutes_Clostridia_Clostridiales_Clostridiaceae_NA_NA.4	Bacteria_Firmicutes_Clostridia_Christensenellales_Christensenellaceae_ChristensenellaceaeR.7group_NA.213	Bacteria_Desulfobacterota_Desulfovibrionia_Desulfovibrionales_Desulfovibrionaceae_NA_NA.21	Bacteria_Firmicutes_Clostridia_Peptostreptococcales.Tissierellales_Peptoniphilus_NA_NA.1	Bacteria_Actinobacteriota_Actinobacteria_Micrococcales_Micrococcaceae_Rothia_dentocariosa	Bacteria_Firmicutes_Bacilli_Erysipelotrichales_Erysipelatoclostridiaceae_UCG.004_NA.15
Bacteria_Bacteroidota_Bacteroidia_Bacteroidales_Bacteroidaceae_Bacteroides_NA.6	Bacteria_Firmicutes_Clostridia_Oscillospirales_Eubacteriumcoprostanoligenesgroup_NA_NA.2	Bacteria_Deferribacterota_Deferribacteres_Deferribacterales_Deferribacteraceae_Mucispirillum_NA.14			Bacteria_Desulfobacterota_Desulfovibrionia_Desulfovibrionales_Desulfovibrionaceae_NA_NA.20			Bacteria_Actinobacteriota_Actinobacteria_Micrococcales_Micrococcaceae_Rothia_NA	Bacteria_Firmicutes_Clostridia_Lachnospirales_Lachnospiraceae_Tyzzerella_NA.66	Bacteria_Firmicutes_Clostridia_Oscillospirales_Ruminococcaceae_NA_NA.193	Bacteria_Patescibacteria_Microgenomatia_CandidatusPacebacteria_NA_NA_NA.1	Bacteria_Cyanobacteria_Cyanobacteriia_Cyanobacteriales_Chroococcidiopsaceae_Aliterella_NA	Bacteria_Patescibacteria_Gracilibacteria_JGI0000069.P22_NA_NA_NA.49	Bacteria_Bacteroidota_Bacteroidia_Bacteroidales_Marinilabiliaceae_NA_NA.13
Archaea_Thermoplasmatota_Thermoplasmata_Methanomassiliicoccales_Methanomethylophilaceae_CandidatusMethanoplasma_NA	Bacteria_Firmicutes_Clostridia_Oscillospirales_Oscillospiraceae_NA_NA.2	Bacteria_Firmicutes_Bacilli_Acholeplasmatales_Acholeplasmataceae_Acholeplasma_NA.18			Bacteria_Firmicutes_Clostridia_Oscillospirales_Ruminococcaceae_Ruminococcus_NA.8			Bacteria_Firmicutes_Clostridia_Oscillospirales_Ruminococcaceae_IncertaeSedis_NA.19	Bacteria_Firmicutes_Clostridia_Oscillospirales_Ruminococcaceae_NA_NA.277	Bacteria_Firmicutes_Clostridia_Christensenellales_Christensenellaceae_ChristensenellaceaeR.7group_NA.218	Bacteria_Firmicutes_Clostridia_Oscillospirales_Ruminococcaceae_NA_NA.319	Bacteria_Firmicutes_Bacilli_RF39_NA_NA_NA.205	Bacteria_Firmicutes_Clostridia_Peptostreptococcales.Tissierellales_Anaerococcus_NA_NA.4	Bacteria_Synergistota_Synergistia_Synergistales_Synergistaceae_NA_NA.7
Bacteria_Desulfobacterota_Desulfovibrionia_Desulfovibrionales_Desulfovibrionaceae_Desulfovibrio_NA.1	Bacteria_Firmicutes_Bacilli_Izemoplasmatales_NA_NA_NA	Bacteria_Actinobacteriota_Actinobacteria_Micrococcales_NA_NA_NA.1			Bacteria_Proteobacteria_Gammaproteobacteria_Burkholderiales_Comamonadaceae_Xylophilus_NA			Bacteria_Firmicutes_Clostridia_Christensenellales_Christensenellaceae_ChristensenellaceaeR.7group_NA.314	Bacteria_Firmicutes_Clostridia_NA_NA_NA_NA.94	Bacteria_Verrucomicrobiota_Verrucomicrobiae_Opitutales_Puniceicoccaceae_NA_NA.2	Bacteria_Deinococcota_Deinococci_Thermales_Thermaceae_Thermus_brockianus	Bacteria_Proteobacteria_Gammaproteobacteria_Burkholderiales_Burkholderiaceae_Polynucleobacter_NA.1	Bacteria_Bacteroidota_Bacteroidia_Bacteroidales_Prevotellaceae_Alloprevotella_NA.1	Bacteria_Proteobacteria_Alphaproteobacteria_Rhizobiales_Xanthobacteraceae_NA_NA.1
Bacteria_Bacteroidota_Bacteroidia_Bacteroidales_Bacteroidaceae_Bacteroides_NA.7	Bacteria_Bacteroidota_Bacteroidia_Bacteroidales_Dysgonomonadaceae_NA_NA.21	Bacteria_Elusimicrobiota_Endomicrobia_Endomicrobiales_Endomicrobiaceae_Endomicrobium_NA.11			Bacteria_Bacteroidota_Bacteroidia_Bacteroidales_NA_NA_NA.15			Bacteria_Firmicutes_Clostridia_NA_NA_NA_NA.123	Bacteria_Firmicutes_Clostridia_Christensenellales_Christensenellaceae_ChristensenellaceaeR.7group_NA.281	Bacteria_Firmicutes_Clostridia_Christensenellales_Christensenellaceae_NA_NA.70	Bacteria_Firmicutes_Clostridia_Christensenellales_Christensenellaceae_NA_NA.141	Bacteria_Bacteroidota_Bacteroidia_Flavobacteriales_Weeksellaceae_Chryseobacterium_taihuense	Bacteria_Actinobacteriota_Actinobacteria_Corynebacteriales_Corynebacteriaceae_Corynebacterium_NA.6	Bacteria_Firmicutes_Clostridia_Oscillospirales_Ruminococcaceae_CandidatusSoleaferrea_NA.152
Bacteria_Bacteroidota_Bacteroidia_Bacteroidales_Tannerellaceae_Parabacteroides_NA.4	Bacteria_Firmicutes_Clostridia_Peptostreptococcales.Tissierellales_Anaerovoracaceae_NA_NA.6				Bacteria_Proteobacteria_Alphaproteobacteria_Rhodospirillales_NA_NA_NA.114			Bacteria_Firmicutes_Clostridia_Peptostreptococcales.Tissierellales_Anaerovoracaceae_NA_NA.51	Bacteria_Firmicutes_Bacilli_RF39_NA_NA_NA.157	Bacteria_Firmicutes_Clostridia_Oscillospirales_Ruminococcaceae_NA_NA.194	Bacteria_Proteobacteria_Alphaproteobacteria_Rhodospirillales_Rhodospirillaceae_NA_NA	Bacteria_Firmicutes_Negativicutes_Veillonellales.Selenomonadales_Sporomusaceae_Dendrosporobacter_NA.1	Bacteria_Firmicutes_Clostridia_Oscillospirales_Butyricicoccaceae_UCG.009_NA.38	Bacteria_Firmicutes_Desulfitobacteriia_Desulfitobacteriales_Desulfitobacteriaceae_Desulfosporosinus_NA.1
Bacteria_Bacteroidota_Bacteroidia_Bacteroidales_Tannerellaceae_Parabacteroides_NA.5	Bacteria_Spirochaetota_Leptospirae_Leptospirales_Leptospiraceae_Rs.H88termitegroup_NA				Bacteria_Firmicutes_Clostridia_Oscillospirales_Ruminococcaceae_Ruminococcus_NA.11			Bacteria_Cyanobacteria_Cyanobacteriia_Cyanobacteriales_Chroococcidiopsaceae_DapisostemonumCCIBt3536_NA	Bacteria_Bacteroidota_Bacteroidia_Bacteroidales_Tannerellaceae_Parabacteroides_NA.42	Bacteria_Firmicutes_Clostridia_Lachnospirales_Lachnospiraceae_Tyzzerella_NA.52	Bacteria_Patescibacteria_Gracilibacteria_JGI0000069.P22_NA_NA_NA.50	Bacteria_Firmicutes_Clostridia_Oscillospirales_Ruminococcaceae_NA_NA.346	Bacteria_Firmicutes_Bacilli_Exiguobacterales_Exiguobacteraceae_Exiguobacterium_NA	Bacteria_Planctomycetota_Phycisphaerae_Tepidisphaerales_WD2101soilgroup_NA_NA
Bacteria_Bacteroidota_Bacteroidia_Bacteroidales_Bacteroidaceae_Bacteroides_NA.8	Bacteria_Desulfobacterota_Desulfovibrionia_Desulfovibrionales_Desulfovibrionaceae_Desulfovibrio_NA.63				Bacteria_Firmicutes_Clostridia_Oscillospirales_Oscillospiraceae_NA_NA.58			Bacteria_Firmicutes_Clostridia_Christensenellales_Christensenellaceae_ChristensenellaceaeR.7group_NA.333	Bacteria_Proteobacteria_Gammaproteobacteria_Xanthomonadales_Xanthomonadaceae_Stenotrophomonas_NA.2	Bacteria_Firmicutes_Clostridia_Oscillospirales_Ruminococcaceae_NA_NA.196	Bacteria_Bacteroidota_Bacteroidia_Bacteroidales_Tannerellaceae_CandidatusVestibaculum_NA.5	Bacteria_Rs.K70termitegroup_NA_NA_NA_NA_NA.16	Bacteria_Proteobacteria_Alphaproteobacteria_NA_NA_NA_NA.48	Bacteria_Actinobacteriota_Thermoleophilia_Solirubrobacterales_67.14_NA_NA
Bacteria_Firmicutes_Clostridia_Peptostreptococcales.Tissierellales_Anaerovoracaceae_NA_NA	Bacteria_Firmicutes_Negativicutes_Veillonellales.Selenomonadales_Sporomusaceae_Dendrosporobacter_NA				Bacteria_Patescibacteria_Saccharimonadia_Saccharimonadales_Saccharimonadaceae_CandidatusSaccharimonas_NA.2			Bacteria_Firmicutes_Clostridia_Christensenellales_Christensenellaceae_ChristensenellaceaeR.7group_NA.334	Bacteria_Proteobacteria_Gammaproteobacteria_Pseudomonadales_Pseudomonadaceae_Pseudomonas_NA.7	Bacteria_Firmicutes_Clostridia_NA_NA_NA_NA.59	Bacteria_Patescibacteria_Microgenomatia_CandidatusPacebacteria_NA_NA_NA.3	Bacteria_Cyanobacteria_Cyanobacteriia_Cyanobacteriales_Chroococcidiopsaceae_NA_NA.1	Bacteria_Actinobacteriota_Acidimicrobiia_Microtrichales_Ilumatobacteraceae_CL500.29marinegroup_NA.1	Bacteria_Planctomycetota_vadinHA49_NA_NA_NA_NA.98
Bacteria_Firmicutes_Clostridia_Lachnospirales_Lachnospiraceae_Lachnoclostridium_NA.2	Bacteria_Bacteroidota_Bacteroidia_Bacteroidales_Rs.E47termitegroup_NA_NA				Bacteria_Firmicutes_Bacilli_RF39_NA_NA_NA.169			Bacteria_Firmicutes_Clostridia_Christensenellales_Christensenellaceae_ChristensenellaceaeR.7group_NA.346	Bacteria_Firmicutes_Clostridia_Peptococcales_Peptococcaceae_NA_NA.49	Bacteria_Firmicutes_Clostridia_Oscillospirales_Ruminococcaceae_NA_NA.199	Bacteria_NA_NA_NA_NA_NA_NA.16	Bacteria_Firmicutes_Clostridia_Peptostreptococcales.Tissierellales_Ezakiella_NA_NA	Bacteria_Proteobacteria_Gammaproteobacteria_Pseudomonadales_Moraxellaceae_Acinetobacter_NA.8	Bacteria_Desulfobacterota_Desulfovibrionia_Desulfovibrionales_Desulfovibrionaceae_Desulfovibrio_NA.280
Bacteria_Bacteroidota_Bacteroidia_Bacteroidales_Tannerellaceae_Parabacteroides_NA.6	Bacteria_Bacteroidota_Bacteroidia_Bacteroidales_Rikenellaceae_Alistipes_NA.31				Bacteria_Firmicutes_Clostridia_NA_NA_NA_NA.105			Bacteria_Patescibacteria_Saccharimonadia_Saccharimonadales_NA_NA_NA.20	Bacteria_Desulfobacterota_Desulfovibrionia_Desulfovibrionales_Desulfovibrionaceae_Desulfovibrio_NA.263	Bacteria_Synergistota_Synergistia_Synergistales_Synergistaceae_NA_NA.3	Bacteria_Bacteroidota_Bacteroidia_Flavobacteriales_Flavobacteriaceae_Flavobacterium_NA.2	Bacteria_Actinobacteriota_Actinobacteria_Micrococcales_Micrococcaceae_Rothia_mucilaginosa.1	Bacteria_Proteobacteria_Gammaproteobacteria_Burkholderiales_Oxalobacteraceae_Massilia_NA.4	Bacteria_Firmicutes_Clostridia_NA_NA_NA_NA.137
Bacteria_Firmicutes_Bacilli_Lactobacillales_Lactobacillaceae_Lactobacillus_NA.2	Bacteria_Bacteroidota_Bacteroidia_Bacteroidales_Marinilabiliaceae_NA_NA.1				Bacteria_Firmicutes_Clostridia_ClostridiaUCG.014_NA_NA_NA.108			Bacteria_Firmicutes_Clostridia_Peptostreptococcales.Tissierellales_Anaerovoracaceae_NA_NA.54	Bacteria_Firmicutes_Clostridia_ClostridiavadinBB60group_NA_NA_NA.60	Bacteria_Firmicutes_Clostridia_Christensenellales_Christensenellaceae_ChristensenellaceaeR.7group_NA.229	Bacteria_Bacteroidota_Bacteroidia_Bacteroidales_Bacteroidaceae_Bacteroides_NA.59	Bacteria_Proteobacteria_Alphaproteobacteria_Sphingomonadales_Sphingomonadaceae_Sphingomonas_NA.2	Bacteria_Firmicutes_Clostridia_Oscillospirales_Oscillospiraceae_NK4A214group_NA.21	Bacteria_Planctomycetota_Planctomycetes_Pirellulales_Pirellulaceae_Termiteplanctomycetecluster_NA.62
Bacteria_Fusobacteriota_Fusobacteriia_Fusobacteriales_Fusobacteriaceae_NA_NA	Bacteria_Firmicutes_Clostridia_Oscillospirales_Ruminococcaceae_NA_NA.34				Bacteria_Firmicutes_Clostridia_Oscillospirales_Ruminococcaceae_CandidatusSoleaferrea_NA.127			Bacteria_Desulfobacterota_Desulfovibrionia_Desulfovibrionales_Desulfovibrionaceae_Desulfovibrio_NA.284	Bacteria_Bacteroidota_Bacteroidia_Cytophagales_Cytophagaceae_Sporocytophaga_NA	Bacteria_Bacteroidota_Bacteroidia_Bacteroidales_Tannerellaceae_NA_NA.15	Bacteria_Firmicutes_Clostridia_Oscillospirales_Ruminococcaceae_NA_NA.345	Bacteria_Firmicutes_Clostridia_NA_NA_NA_NA.145	Bacteria_Firmicutes_Bacilli_RF39_NA_NA_NA.223	Bacteria_Firmicutes_Bacilli_Erysipelotrichales_Erysipelatoclostridiaceae_Erysipelatoclostridium_NA.16
Bacteria_Bacteroidota_Bacteroidia_Bacteroidales_Tannerellaceae_Parabacteroides_NA.7	Bacteria_Firmicutes_Syntrophomonadia_Syntrophomonadales_Syntrophomonadaceae_Pelospora_NA				Bacteria_Bacteroidota_Bacteroidia_Bacteroidales_Marinifilaceae_Sanguibacteroides_NA.10			Bacteria_Firmicutes_Clostridia_Oscillospirales_Ruminococcaceae_NA_NA.363	Bacteria_Proteobacteria_Alphaproteobacteria_Rhizobiales_Beijerinckiaceae_Methylobacterium.Methylorubrum_NA.5	Bacteria_Proteobacteria_Alphaproteobacteria_Paracaedibacterales_Paracaedibacteraceae_NA_NA	Bacteria_Bacteroidota_Bacteroidia_Bacteroidales_Rikenellaceae_NA_NA.7	Bacteria_Proteobacteria_Gammaproteobacteria_Burkholderiales_Comamonadaceae_Rhodoferax_NA.1	Bacteria_Proteobacteria_Alphaproteobacteria_NA_NA_NA_NA.65	Bacteria_Proteobacteria_Gammaproteobacteria_Burkholderiales_NA_NA_NA.3
Bacteria_Bacteroidota_Bacteroidia_Bacteroidales_Tannerellaceae_NA_NA.1	Bacteria_Verrucomicrobiota_Kiritimatiellae_WCHB1.41_NA_NA_NA.1				Bacteria_Proteobacteria_Alphaproteobacteria_Rhodospirillales_NA_NA_NA.129			Bacteria_Bacteroidota_Bacteroidia_Bacteroidales_Bacteroidaceae_Bacteroides_NA.73	Bacteria_Firmicutes_Clostridia_Oscillospirales_Ruminococcaceae_NA_NA.304	Bacteria_Bacteroidota_Bacteroidia_Bacteroidales_Paludibacteraceae_NA_NA.20	Bacteria_Spirochaetota_Leptospirae_Leptospirales_Leptospiraceae_Rs.H88termitegroup_NA.3	Bacteria_Cyanobacteria_Cyanobacteriia_Cyanobacteriales_Chroococcidiopsaceae_DapisostemonumCCIBt3536_NA.1	Bacteria_Verrucomicrobiota_Chlamydiae_Chlamydiales_cvE6_NA_NA	Bacteria_Firmicutes_Clostridia_NA_NA_NA_NA.138
Bacteria_Bacteroidota_Bacteroidia_Bacteroidales_M2PB4.65termitegroup_NA_NA.1	Bacteria_Firmicutes_Clostridia_Peptococcales_Peptococcaceae_NA_NA.3				Bacteria_Patescibacteria_Saccharimonadia_Saccharimonadales_Saccharimonadaceae_CandidatusSaccharimonas_NA.4			Bacteria_Bacteroidota_Bacteroidia_Bacteroidales_Tannerellaceae_Parabacteroides_NA.63	Bacteria_Firmicutes_Clostridia_Lachnospirales_Lachnospiraceae_Tyzzerella_NA.73	Bacteria_Firmicutes_Clostridia_NA_NA_NA_NA.65	Bacteria_Planctomycetota_vadinHA49_NA_NA_NA_NA.96	Bacteria_Firmicutes_Bacilli_RF39_NA_NA_NA.235	Bacteria_Proteobacteria_Alphaproteobacteria_Rhizobiales_Rhizobiaceae_NA_NA.3	Bacteria_Firmicutes_Clostridia_NA_NA_NA_NA.147
Bacteria_Bacteroidota_Bacteroidia_Bacteroidales_M2PB4.65termitegroup_NA_NA.2	Bacteria_Firmicutes_Bacilli_RF39_NA_NA_NA.6				Bacteria_Bacteroidota_Bacteroidia_Bacteroidales_NA_NA_NA.19			Bacteria_Bacteroidota_Bacteroidia_Bacteroidales_NA_NA_NA.48	Bacteria_Bacteroidota_Bacteroidia_Bacteroidales_Rikenellaceae_Alistipes_NA.104	Bacteria_Desulfobacterota_Desulfovibrionia_Desulfovibrionales_Desulfovibrionaceae_Desulfovibrio_NA.217	Bacteria_Bacteroidota_Bacteroidia_Bacteroidales_Paludibacteraceae_NA_NA.23	Bacteria_Patescibacteria_Microgenomatia_CandidatusPacebacteria_NA_NA_NA.11	Bacteria_Proteobacteria_Alphaproteobacteria_NA_NA_NA_NA.74	Bacteria_Proteobacteria_Alphaproteobacteria_Rhodobacterales_Rhodobacteraceae_Paracoccus_NA
Archaea_Thermoplasmatota_Thermoplasmata_Methanomassiliicoccales_Methanomethylophilaceae_NA_NA	Bacteria_Firmicutes_Clostridia_Peptococcales_Peptococcaceae_NA_NA.4				Bacteria_Bacteroidota_Bacteroidia_Bacteroidales_Tannerellaceae_Parabacteroides_NA.45			Bacteria_Firmicutes_Negativicutes_Acidaminococcales_Acidaminococcaceae_NA_NA.14	Bacteria_Proteobacteria_Gammaproteobacteria_Enterobacterales_Morganellaceae_Morganella_morganii	Bacteria_Firmicutes_Clostridia_Christensenellales_Christensenellaceae_ChristensenellaceaeR.7group_NA.242	Bacteria_Proteobacteria_Alphaproteobacteria_Sphingomonadales_Sphingomonadaceae_NA_NA	Bacteria_Verrucomicrobiota_Verrucomicrobiae_Chthoniobacterales_Chthoniobacteraceae_Chthoniobacter_NA.2	Bacteria_Proteobacteria_Alphaproteobacteria_Rhodospirillales_NA_NA_NA.194	Bacteria_Bacteroidota_Bacteroidia_Bacteroidales_Dysgonomonadaceae_NA_NA.67
Bacteria_Bacteroidota_Bacteroidia_Bacteroidales_Bacteroidaceae_Bacteroides_NA.9	Bacteria_Actinobacteriota_Coriobacteriia_Coriobacteriales_CoriobacterialesIncertaeSedis_NA_NA.2				Bacteria_Desulfobacterota_Desulfarculia_Desulfarculales_NA_NA_NA.12			Bacteria_Bacteroidota_Bacteroidia_Bacteroidales_NA_NA_NA.51	Bacteria_Bacteroidota_Bacteroidia_Bacteroidales_Tannerellaceae_Parabacteroides_NA.46	Bacteria_Firmicutes_Clostridia_Christensenellales_Christensenellaceae_ChristensenellaceaeR.7group_NA.243	Bacteria_Proteobacteria_Alphaproteobacteria_Sphingomonadales_Sphingomonadaceae_Sphingomonas_NA.3	Bacteria_Proteobacteria_Gammaproteobacteria_Oceanospirillales_Pseudohongiellaceae_BIyi10_NA	Bacteria_NA_NA_NA_NA_NA_NA.86	Bacteria_Firmicutes_Bacilli_RF39_NA_NA_NA.224
Bacteria_Firmicutes_Clostridia_Lachnospirales_Lachnospiraceae_Lachnoclostridium_NA.3	Bacteria_Firmicutes_Bacilli_Erysipelotrichales_Erysipelatoclostridiaceae_UCG.004_NA.2				Bacteria_Firmicutes_Clostridia_ClostridiaUCG.014_NA_NA_NA.116			Bacteria_Desulfobacterota_Desulfovibrionia_Desulfovibrionales_Desulfovibrionaceae_Desulfovibrio_NA.312	Bacteria_Patescibacteria_Saccharimonadia_Saccharimonadales_NA_NA_NA.10	Bacteria_Planctomycetota_vadinHA49_NA_NA_NA_NA.63	Bacteria_Proteobacteria_Alphaproteobacteria_Rhodospirillales_NA_NA_NA.163	Bacteria_Cyanobacteria_Vampirivibrionia_Gastranaerophilales_NA_NA_NA.18		Bacteria_Actinobacteriota_Actinobacteria_Micrococcales_Micrococcaceae_Kocuria_NA.2
Bacteria_Bacteroidota_Bacteroidia_Bacteroidales_NA_NA_NA.1	Bacteria_Firmicutes_Clostridia_Oscillospirales_Oscillospiraceae_NK4A214group_NA.2				Bacteria_Bacteroidota_Bacteroidia_Bacteroidales_Dysgonomonadaceae_NA_NA.50			Bacteria_Firmicutes_Clostridia_Christensenellales_Christensenellaceae_NA_NA.173	Bacteria_Firmicutes_Bacilli_Lactobacillales_Enterococcaceae_NA_NA.5	Bacteria_Firmicutes_Clostridia_Christensenellales_Christensenellaceae_NA_NA.82	Bacteria_NA_NA_NA_NA_NA_NA.29	Bacteria_Patescibacteria_Saccharimonadia_Saccharimonadales_NA_NA_NA.38		Bacteria_Bacteroidota_Bacteroidia_Bacteroidales_MgMjR.022_NA_NA.3
Bacteria_Firmicutes_Clostridia_Oscillospirales_Oscillospiraceae_Colidextribacter_NA	Bacteria_Elusimicrobiota_Elusimicrobia_Elusimicrobiales_Elusimicrobiaceae_Elusimicrobium_NA.2				Bacteria_Bacteroidota_Bacteroidia_Bacteroidales_Rikenellaceae_Alistipes_NA.112			Bacteria_NA_NA_NA_NA_NA_NA.54	Bacteria_Sumerlaeota_Sumerlaeia_Sumerlaeales_Sumerlaeaceae_Sumerlaea_NA.1	Bacteria_Patescibacteria_Gracilibacteria_JGI0000069.P22_NA_NA_NA.29	Bacteria_Firmicutes_Bacilli_Erysipelotrichales_Erysipelatoclostridiaceae_UCG.004_NA.16	Bacteria_Verrucomicrobiota_Verrucomicrobiae_Verrucomicrobiales_Rubritaleaceae_Luteolibacter_NA.1		Bacteria_Patescibacteria_Gracilibacteria_CandidatusPeribacteria_NA_NA_NA
Bacteria_Bacteroidota_Bacteroidia_Bacteroidales_Tannerellaceae_Parabacteroides_NA.8	Bacteria_Bacteroidota_Bacteroidia_Bacteroidales_Tannerellaceae_NA_NA.8				Bacteria_Firmicutes_Clostridia_Oscillospirales_Ruminococcaceae_Ruminococcus_NA.14			Bacteria_NA_NA_NA_NA_NA_NA.55	Bacteria_Proteobacteria_Alphaproteobacteria_Caulobacterales_Caulobacteraceae_Caulobacter_NA.1	Bacteria_NA_NA_NA_NA_NA_NA.12	Bacteria_Firmicutes_Clostridia_Oscillospirales_Ruminococcaceae_Pygmaiobacter_NA.1	Bacteria_Proteobacteria_Alphaproteobacteria_Rhodospirillales_NA_NA_NA.181		Bacteria_Bacteroidota_Bacteroidia_Bacteroidales_Prevotellaceae_NA_NA
Bacteria_Firmicutes_Clostridia_Lachnospirales_Lachnospiraceae_Robinsoniella_NA	Bacteria_Firmicutes_Clostridia_Peptococcales_Peptococcaceae_NA_NA.6				Bacteria_Bacteroidota_Bacteroidia_Bacteroidales_Dysgonomonadaceae_NA_NA.52			Bacteria_Firmicutes_Clostridia_Christensenellales_Christensenellaceae_NA_NA.175	Bacteria_Firmicutes_Bacilli_Lactobacillales_NA_NA_NA.10	Bacteria_Firmicutes_Bacilli_RF39_NA_NA_NA.103	Bacteria_Bacteroidota_Bacteroidia_Bacteroidales_Rikenellaceae_Alistipes_NA.133	Bacteria_Proteobacteria_Alphaproteobacteria_Rhizobiales_Beijerinckiaceae_Psychroglaciecola_NA		Bacteria_NA_NA_NA_NA_NA_NA.43
Bacteria_Bacteroidota_Bacteroidia_Bacteroidales_Tannerellaceae_Parabacteroides_NA.9	Bacteria_Firmicutes_Clostridia_Peptococcales_Peptococcaceae_NA_NA.7				Bacteria_Firmicutes_Clostridia_Christensenellales_Christensenellaceae_ChristensenellaceaeR.7group_NA.310			Bacteria_Firmicutes_Clostridia_Christensenellales_Christensenellaceae_ChristensenellaceaeR.7group_NA.399	Bacteria_Firmicutes_Clostridia_NA_NA_NA_NA.159	Bacteria_Firmicutes_Clostridia_ClostridiaUCG.014_NA_NA_NA.75	Bacteria_Verrucomicrobiota_Verrucomicrobiae_Chthoniobacterales_Terrimicrobiaceae_Terrimicrobium_NA	Bacteria_Patescibacteria_Parcubacteria_NA_NA_NA_NA.7		Bacteria_Firmicutes_Clostridia_Lachnospirales_Lachnospiraceae_LachnospiraceaeUCG.010_NA.10
Bacteria_Bacteroidota_Bacteroidia_Bacteroidales_M2PB4.65termitegroup_NA_NA.3	Bacteria_Firmicutes_Bacilli_Erysipelotrichales_Erysipelotrichaceae_Erysipelothrix_NA				Bacteria_Fibrobacterota_Fibrobacteria_Fibrobacterales_Fibrobacteraceae_Fibrobacter_NA.2			Bacteria_Firmicutes_Clostridia_Lachnospirales_Lachnospiraceae_NA_NA.113	Bacteria_Firmicutes_Clostridia_Peptococcales_Peptococcaceae_NA_NA.70	Bacteria_Firmicutes_Clostridia_Christensenellales_Christensenellaceae_NA_NA.85	Bacteria_Proteobacteria_Gammaproteobacteria_Diplorickettsiales_Diplorickettsiaceae_Aquicella_NA	Bacteria_Planctomycetota_Planctomycetes_Isosphaerales_Isosphaeraceae_NA_NA.1		Bacteria_Firmicutes_Clostridia_Oscillospirales_Eubacteriumcoprostanoligenesgroup_NA_NA.49
Bacteria_Firmicutes_BRH.c20a_NA_NA_NA_NA	Bacteria_Firmicutes_Clostridia_Oscillospirales_UCG.010_NA_NA.3				Bacteria_Firmicutes_Clostridia_Oscillospirales_Eubacteriumcoprostanoligenesgroup_NA_NA.43			Bacteria_Desulfobacterota_Desulfovibrionia_Desulfovibrionales_Desulfovibrionaceae_Desulfovibrio_NA.322	Bacteria_Verrucomicrobiota_Kiritimatiellae_WCHB1.41_NA_NA_NA.12	Bacteria_Desulfobacterota_Desulfovibrionia_Desulfovibrionales_Desulfovibrionaceae_Desulfovibrio_NA.228	Bacteria_Patescibacteria_Parcubacteria_NA_NA_NA_NA.3	Bacteria_Proteobacteria_Alphaproteobacteria_Rhodospirillales_NA_NA_NA.192		Bacteria_Bacteroidota_Bacteroidia_Bacteroidales_Prevotellaceae_Prevotella_NA.3
Bacteria_Firmicutes_Bacilli_Erysipelotrichales_Erysipelatoclostridiaceae_Erysipelatoclostridium_NA.1	Bacteria_Elusimicrobiota_Elusimicrobia_Elusimicrobiales_Elusimicrobiaceae_Elusimicrobium_NA.3				Bacteria_Firmicutes_Clostridia_Christensenellales_Christensenellaceae_ChristensenellaceaeR.7group_NA.317			Bacteria_Bacteroidota_Bacteroidia_Bacteroidales_3M1PL1.52termitegroup_NA_NA.7		Bacteria_Elusimicrobiota_Endomicrobia_Endomicrobiales_Endomicrobiaceae_Endomicrobium_NA.16	Bacteria_Actinobacteriota_Actinobacteria_Micrococcales_Microbacteriaceae_Aurantimicrobium_NA			Bacteria_Bacteroidota_Bacteroidia_Flavobacteriales_Flavobacteriaceae_Capnocytophaga_NA
Bacteria_Firmicutes_Clostridia_Lachnospirales_Lachnospiraceae_NA_NA.1	Bacteria_Bacteroidota_Bacteroidia_Bacteroidales_Dysgonomonadaceae_Dysgonomonas_NA.22				Bacteria_Patescibacteria_Saccharimonadia_Saccharimonadales_NA_NA_NA.16			Bacteria_Proteobacteria_Gammaproteobacteria_Enterobacterales_Enterobacteriaceae_NA_NA.6		Bacteria_Spirochaetota_Spirochaetia_Spirochaetales_Spirochaetaceae_Treponema_NA.14	Bacteria_Firmicutes_NA_NA_NA_NA_NA.38			Bacteria_NA_NA_NA_NA_NA_NA.68
Bacteria_Desulfobacterota_Desulfovibrionia_Desulfovibrionales_Desulfovibrionaceae_Desulfovibrio_NA.2	Bacteria_Firmicutes_Clostridia_Oscillospirales_Ruminococcaceae_NA_NA.43				Bacteria_Firmicutes_Clostridia_Oscillospirales_Ruminococcaceae_CandidatusSoleaferrea_NA.150			Bacteria_Firmicutes_Clostridia_Oscillospirales_Ruminococcaceae_NA_NA.394		Bacteria_Planctomycetota_Planctomycetes_Pirellulales_Pirellulaceae_Termiteplanctomycetecluster_NA.45	Bacteria_NA_NA_NA_NA_NA_NA.65			Bacteria_Firmicutes_Clostridia_Oscillospirales_NA_NA_NA.54
Bacteria_Spirochaetota_Spirochaetia_Spirochaetales_Spirochaetaceae_Sediminispirochaeta_NA	Bacteria_Firmicutes_Clostridia_Oscillospirales_Oscillospiraceae_NA_NA.4				Bacteria_Bacteroidota_Bacteroidia_Bacteroidales_NA_NA_NA.25			Bacteria_Firmicutes_Clostridia_Lachnospirales_Lachnospiraceae_NA_NA.114		Bacteria_Firmicutes_Bacilli_RF39_NA_NA_NA.111	Bacteria_Deinococcota_Deinococci_Deinococcales_Deinococcaceae_Deinococcus_NA			Bacteria_Planctomycetota_Planctomycetes_Planctomycetales_NA_NA_NA
Bacteria_Firmicutes_Clostridia_Christensenellales_Christensenellaceae_ChristensenellaceaeR.7group_NA.1	Bacteria_Firmicutes_Syntrophomonadia_Syntrophomonadales_Syntrophomonadaceae_NA_NA				Bacteria_Firmicutes_Clostridia_Oscillospirales_Oscillospiraceae_NA_NA.67			Bacteria_Bacteroidota_Bacteroidia_Chitinophagales_Chitinophagaceae_Sediminibacterium_goheungense		Bacteria_Firmicutes_Clostridia_Christensenellales_Christensenellaceae_NA_NA.90	Bacteria_Bacteroidota_Bacteroidia_Bacteroidales_Prevotellaceae_Alloprevotella_tannerae			Bacteria_Proteobacteria_Alphaproteobacteria_Sphingomonadales_Sphingomonadaceae_Novosphingobium_NA.2
Bacteria_Desulfobacterota_Desulfovibrionia_Desulfovibrionales_Desulfovibrionaceae_Desulfovibrio_NA.3	Bacteria_Firmicutes_Clostridia_Oscillospirales_Ruminococcaceae_CandidatusSoleaferrea_NA.9				Bacteria_Firmicutes_Clostridia_NA_NA_NA_NA.128			Bacteria_Desulfobacterota_Desulfovibrionia_Desulfovibrionales_Desulfovibrionaceae_Desulfovibrio_NA.329		Bacteria_Firmicutes_Clostridia_Oscillospirales_Hydrogenoanaerobacterium_NA_NA.10	Bacteria_Proteobacteria_Alphaproteobacteria_Sphingomonadales_Sphingomonadaceae_Novosphingobium_NA.3			Bacteria_Patescibacteria_Parcubacteria_CandidatusMoranbacteria_NA_NA_NA.2
Bacteria_Bacteroidota_Bacteroidia_Bacteroidales_Bacteroidaceae_Bacteroides_NA.10	Bacteria_Firmicutes_Clostridia_Oscillospirales_UCG.010_NA_NA.4				Bacteria_Firmicutes_Clostridia_Oscillospirales_Ruminococcaceae_Ruminococcus_NA.18			Bacteria_Firmicutes_BRH.c20a_NA_NA_NA_NA.3		Bacteria_Firmicutes_Clostridia_Oscillospirales_Ruminococcaceae_NA_NA.233	Bacteria_Cyanobacteria_Sericytochromatia_NA_NA_NA_NA			Bacteria_Patescibacteria_Parcubacteria_NA_NA_NA_NA.8
Bacteria_Firmicutes_Clostridia_Christensenellales_Christensenellaceae_ChristensenellaceaeR.7group_NA.2	Bacteria_Firmicutes_Clostridia_Oscillospirales_Ruminococcaceae_CandidatusSoleaferrea_NA.10				Bacteria_Firmicutes_Clostridia_Christensenellales_Christensenellaceae_ChristensenellaceaeR.7group_NA.322			Bacteria_Verrucomicrobiota_Lentisphaeria_Victivallales_Victivallaceae_NA_NA.13		Bacteria_Desulfobacterota_Desulfovibrionia_Desulfovibrionales_Desulfovibrionaceae_Desulfovibrio_NA.235	Bacteria_Patescibacteria_Parcubacteria_CandidatusNomurabacteria_NA_NA_NA.8			Bacteria_Patescibacteria_Parcubacteria_CandidatusNomurabacteria_NA_NA_NA.6
Bacteria_Bacteroidota_Bacteroidia_Bacteroidales_Paludibacteraceae_NA_NA	Bacteria_Verrucomicrobiota_Lentisphaeria_Victivallales_vadinBE97_NA_NA				Bacteria_Bacteroidota_Bacteroidia_Bacteroidales_Tannerellaceae_NA_NA.29			Bacteria_Firmicutes_Clostridia_Oscillospirales_Ruminococcaceae_Anaerotruncus_NA.6		Bacteria_Planctomycetota_vadinHA49_NA_NA_NA_NA.72	Bacteria_Proteobacteria_Alphaproteobacteria_Rickettsiales_Rickettsiaceae_CandidatusCryptoprodotis_NA			Bacteria_Proteobacteria_Gammaproteobacteria_Cardiobacteriales_Cardiobacteriaceae_Cardiobacterium_hominis
Bacteria_Desulfobacterota_Desulfovibrionia_Desulfovibrionales_Desulfovibrionaceae_Desulfovibrio_NA.4	Bacteria_Firmicutes_Clostridia_Christensenellales_Christensenellaceae_ChristensenellaceaeR.7group_NA.53				Bacteria_Desulfobacterota_Desulfovibrionia_Desulfovibrionales_Desulfovibrionaceae_Desulfovibrio_NA.275			Bacteria_Firmicutes_NA_NA_NA_NA_NA.52		Bacteria_Firmicutes_Clostridia_Oscillospirales_Oscillospiraceae_NA_NA.47				Archaea_Nanoarchaeota_Nanoarchaeia_Woesearchaeales_NA_NA_NA.1
Bacteria_Firmicutes_Negativicutes_Acidaminococcales_Acidaminococcaceae_Phascolarctobacterium_NA	Bacteria_Desulfobacterota_Desulfovibrionia_Desulfovibrionales_Desulfovibrionaceae_NA_NA.8				Bacteria_Firmicutes_Clostridia_Oscillospirales_Ruminococcaceae_Ruminococcus_NA.19			Bacteria_Firmicutes_Clostridia_Oscillospirales_Ruminococcaceae_NA_NA.420		Bacteria_Firmicutes_Clostridia_Oscillospirales_Ruminococcaceae_NA_NA.238				Bacteria_Bacteroidota_Bacteroidia_Chitinophagales_Chitinophagaceae_Rurimicrobium_NA
Bacteria_Bacteroidota_Bacteroidia_Bacteroidales_Dysgonomonadaceae_NA_NA.4	Bacteria_Firmicutes_Clostridia_Oscillospirales_Butyricicoccaceae_UCG.009_NA.7				Bacteria_Bacteroidota_Bacteroidia_Bacteroidales_NA_NA_NA.32					Bacteria_Firmicutes_NA_NA_NA_NA_NA.17				Bacteria_Verrucomicrobiota_Lentisphaeria_Victivallales_Victivallaceae_NA_NA.12
Archaea_Euryarchaeota_Methanobacteria_Methanobacteriales_Methanobacteriaceae_Methanobrevibacter_NA	Bacteria_Firmicutes_Clostridia_Peptostreptococcales.Tissierellales_Anaerovoracaceae_NA_NA.11				Bacteria_Firmicutes_Clostridia_Christensenellales_Christensenellaceae_ChristensenellaceaeR.7group_NA.331					Bacteria_Firmicutes_Bacilli_RF39_NA_NA_NA.125				Bacteria_Proteobacteria_Alphaproteobacteria_Caulobacterales_Caulobacteraceae_Asticcacaulis_NA
Bacteria_Bacteroidota_Bacteroidia_Bacteroidales_Tannerellaceae_Parabacteroides_NA.11	Bacteria_Bacteroidota_Bacteroidia_Bacteroidales_Rikenellaceae_Alistipes_NA.37				Bacteria_Synergistota_Synergistia_Synergistales_Synergistaceae_CandidatusTammella_NA.33					Bacteria_Firmicutes_Clostridia_Oscillospirales_Ruminococcaceae_CandidatusSoleaferrea_NA.106				Bacteria_Patescibacteria_Parcubacteria_NA_NA_NA_NA.10
Bacteria_Bacteroidota_Bacteroidia_Bacteroidales_Bacteroidaceae_Bacteroides_NA.11	Bacteria_Bacteroidota_Bacteroidia_Bacteroidales_Paludibacteraceae_Paludibacter_NA.4				Bacteria_Firmicutes_Clostridia_NA_NA_NA_NA.130					Bacteria_Firmicutes_Clostridia_Oscillospirales_Oscillospiraceae_NA_NA.49				Bacteria_Proteobacteria_Alphaproteobacteria_Rickettsiales_NA_NA_NA.6
Bacteria_Firmicutes_Bacilli_Acholeplasmatales_Acholeplasmataceae_Acholeplasma_NA	Bacteria_Firmicutes_Clostridia_Peptococcales_Peptococcaceae_NA_NA.10				Bacteria_Firmicutes_Clostridia_Eubacteriales_Anaerofustaceae_Anaerofustis_NA.4					Bacteria_Proteobacteria_Alphaproteobacteria_Rhodospirillales_NA_NA_NA.101
Bacteria_Desulfobacterota_Desulfovibrionia_Desulfovibrionales_Desulfovibrionaceae_Desulfovibrio_NA.5	Bacteria_Verrucomicrobiota_Kiritimatiellae_WCHB1.41_NA_NA_NA.2				Bacteria_Patescibacteria_Saccharimonadia_Saccharimonadales_NA_NA_NA.18					Bacteria_Firmicutes_Clostridia_Lachnospirales_Lachnospiraceae_Tyzzerella_NA.64
Bacteria_Desulfobacterota_Desulfobacteria_Desulfobacterales_NA_NA_NA	Bacteria_Firmicutes_Clostridia_Christensenellales_Christensenellaceae_NA_NA.12				Bacteria_Bacteroidota_Bacteroidia_Bacteroidales_Tannerellaceae_Parabacteroides_NA.55					Bacteria_Firmicutes_Clostridia_ClostridiavadinBB60group_NA_NA_NA.53
Bacteria_Firmicutes_Clostridia_Lachnospirales_Lachnospiraceae_IncertaeSedis_NA.1	Bacteria_Proteobacteria_Alphaproteobacteria_Rhodospirillales_NA_NA_NA.10				Bacteria_NA_NA_NA_NA_NA_NA.24					Bacteria_Patescibacteria_Gracilibacteria_JGI0000069.P22_NA_NA_NA.37
Bacteria_Bacteroidota_Bacteroidia_Bacteroidales_Marinifilaceae_Odoribacter_NA.2	Bacteria_Firmicutes_NA_NA_NA_NA_NA.5				Bacteria_Verrucomicrobiota_Verrucomicrobiae_LD1.PB3_NA_NA_NA.4					Bacteria_Desulfobacterota_Desulfovibrionia_Desulfovibrionales_Desulfovibrionaceae_Desulfovibrio_NA.246
Bacteria_Desulfobacterota_Desulfovibrionia_Desulfovibrionales_Desulfovibrionaceae_NA_NA	Bacteria_Firmicutes_Clostridia_Peptostreptococcales.Tissierellales_Anaerovoracaceae_Anaerovorax_NA.1				Bacteria_Firmicutes_Clostridia_Christensenellales_Christensenellaceae_ChristensenellaceaeR.7group_NA.332					Bacteria_Firmicutes_Clostridia_Christensenellales_Christensenellaceae_ChristensenellaceaeR.7group_NA.271
Bacteria_Bacteroidota_Bacteroidia_Bacteroidales_Tannerellaceae_Parabacteroides_NA.12	Bacteria_Firmicutes_Clostridia_Christensenellales_Christensenellaceae_ChristensenellaceaeR.7group_NA.59				Bacteria_Bacteroidota_Bacteroidia_Bacteroidales_NA_NA_NA.34					Bacteria_Proteobacteria_Gammaproteobacteria_Burkholderiales_Alcaligenaceae_Achromobacter_NA
Bacteria_Bacteroidota_Bacteroidia_Bacteroidales_Rikenellaceae_RikenellaceaeRC9gutgroup_NA.4	Bacteria_Patescibacteria_Gracilibacteria_JGI0000069.P22_NA_NA_NA.2				Bacteria_Rs.K70termitegroup_NA_NA_NA_NA_NA.17					Bacteria_Cyanobacteria_Vampirivibrionia_Gastranaerophilales_NA_NA_NA.10
Bacteria_Bacteroidota_Bacteroidia_Bacteroidales_Rikenellaceae_Alistipes_NA.3	Bacteria_Bacteroidota_Bacteroidia_Bacteroidales_Marinilabiliaceae_NA_NA.4				Bacteria_Proteobacteria_Alphaproteobacteria_Rhodospirillales_NA_NA_NA.164					Bacteria_Firmicutes_Clostridia_ClostridiaUCG.014_NA_NA_NA.95
Bacteria_Desulfobacterota_Desulfovibrionia_Desulfovibrionales_Desulfovibrionaceae_Desulfovibrio_NA.6	Bacteria_Firmicutes_Clostridia_Oscillospirales_NA_NA_NA.2				Bacteria_Firmicutes_Bacilli_Erysipelotrichales_Erysipelotrichaceae_Breznakia_NA.10					Bacteria_Proteobacteria_Alphaproteobacteria_Paracaedibacterales_Paracaedibacteraceae_NA_NA.3
Bacteria_Firmicutes_Clostridia_Peptostreptococcales.Tissierellales_Peptostreptococcaceae_Romboutsia_NA.1	Bacteria_Desulfobacterota_Desulfovibrionia_Desulfovibrionales_Desulfovibrionaceae_Desulfovibrio_NA.96				Bacteria_Firmicutes_Clostridia_Oscillospirales_Ruminococcaceae_NA_NA.361					Bacteria_Firmicutes_Clostridia_Oscillospirales_Butyricicoccaceae_UCG.009_NA.31
Bacteria_Firmicutes_Bacilli_Acholeplasmatales_Acholeplasmataceae_Acholeplasma_NA.1	Bacteria_Verrucomicrobiota_Kiritimatiellae_WCHB1.41_NA_NA_NA.3				Bacteria_Bacteroidota_Bacteroidia_Bacteroidales_Dysgonomonadaceae_NA_NA.61					Bacteria_Firmicutes_Bacilli_Mycoplasmatales_Mycoplasmataceae_Mycoplasma_NA.1
Bacteria_Firmicutes_Clostridia_Lachnospirales_Lachnospiraceae_NA_NA.4	Bacteria_Firmicutes_Clostridia_Peptostreptococcales.Tissierellales_Anaerovoracaceae_Anaerovorax_NA.2				Bacteria_Bacteroidota_Bacteroidia_Bacteroidales_Rikenellaceae_Alistipes_NA.126					Bacteria_Bdellovibrionota_Bdellovibrionia_Bacteriovoracales_Bacteriovoracaceae_Peredibacter_NA.7
Bacteria_Desulfobacterota_Desulfovibrionia_Desulfovibrionales_Desulfovibrionaceae_Desulfovibrio_NA.7	Bacteria_Firmicutes_Syntrophomonadia_Syntrophomonadales_Syntrophomonadaceae_Syntrophomonas_NA				Bacteria_Elusimicrobiota_Elusimicrobia_Elusimicrobiales_Elusimicrobiaceae_Elusimicrobium_NA.24					Bacteria_Proteobacteria_Alphaproteobacteria_Rhizobiales_Rhizobiaceae_Allorhizobium.Neorhizobium.Pararhizobium.Rhizobium_NA
Bacteria_Bacteroidota_Bacteroidia_Bacteroidales_M2PB4.65termitegroup_NA_NA.4	Bacteria_Firmicutes_Syntrophomonadia_Syntrophomonadales_Syntrophomonadaceae_Pelospora_NA.1				Bacteria_Firmicutes_Clostridia_Peptostreptococcales.Tissierellales_Anaerovoracaceae_NA_NA.53					Bacteria_Bacteroidota_Bacteroidia_Bacteroidales_Tannerellaceae_NA_NA.21
Bacteria_Firmicutes_Bacilli_Erysipelotrichales_Erysipelotrichaceae_Anaerorhabdusfurcosagroup_NA	Bacteria_Firmicutes_Clostridia_Hungateiclostridiaceae_NA_NA_NA				Bacteria_Firmicutes_Clostridia_Oscillospirales_Ruminococcaceae_NA_NA.362					Bacteria_Firmicutes_Bacilli_RF39_NA_NA_NA.173
Bacteria_Firmicutes_Clostridia_Peptostreptococcales.Tissierellales_Anaerovoracaceae_FamilyXIIIAD3011group_NA	Bacteria_Firmicutes_Clostridia_Oscillospirales_Ruminococcaceae_CandidatusSoleaferrea_NA.13				Bacteria_NA_NA_NA_NA_NA_NA.26					Bacteria_Firmicutes_Clostridia_Oscillospirales_Ruminococcaceae_NA_NA.330
Bacteria_Bacteroidota_Bacteroidia_Bacteroidales_Bacteroidaceae_Bacteroides_NA.12	Bacteria_Desulfobacterota_Desulfovibrionia_Desulfovibrionales_Desulfovibrionaceae_Desulfovibrio_NA.103				Bacteria_Firmicutes_Clostridia_Christensenellales_Christensenellaceae_ChristensenellaceaeR.7group_NA.345					Bacteria_Elusimicrobiota_Elusimicrobia_Elusimicrobiales_Elusimicrobiaceae_Elusimicrobium_NA.23
Bacteria_Firmicutes_Clostridia_Lachnospirales_Lachnospiraceae_IncertaeSedis_NA.2	Bacteria_Proteobacteria_Alphaproteobacteria_NA_NA_NA_NA.4				Bacteria_Firmicutes_Clostridia_Oscillospirales_Ruminococcaceae_NA_NA.372					Bacteria_Proteobacteria_Alphaproteobacteria_Rhizobiales_Rhizobiaceae_Allorhizobium.Neorhizobium.Pararhizobium.Rhizobium_NA.1
Bacteria_Bacteroidota_Bacteroidia_Bacteroidales_Williamwhitmaniaceae_Rs.D38termitegroup_NA	Bacteria_Desulfobacterota_Desulfarculia_Desulfarculales_NA_NA_NA.1				Bacteria_Firmicutes_Clostridia_Oscillospirales_NA_NA_NA.38					Bacteria_Firmicutes_Bacilli_Lactobacillales_Enterococcaceae_NA_NA.8
Bacteria_Bacteroidota_Bacteroidia_Bacteroidales_Dysgonomonadaceae_NA_NA.5	Bacteria_Proteobacteria_Alphaproteobacteria_Rhodospirillales_NA_NA_NA.15				Bacteria_Firmicutes_Clostridia_Peptostreptococcales.Tissierellales_Anaerovoracaceae_NA_NA.57					Bacteria_Firmicutes_Bacilli_RsaHf231_NA_NA_NA.8
Bacteria_Rs.K70termitegroup_NA_NA_NA_NA_NA	Bacteria_Bacteroidota_Bacteroidia_Bacteroidales_Tannerellaceae_Tannerella_NA.4				Bacteria_NA_NA_NA_NA_NA_NA.31					Bacteria_Patescibacteria_Saccharimonadia_Saccharimonadales_NA_NA_NA.35
Bacteria_Bacteroidota_Bacteroidia_Bacteroidales_Marinifilaceae_Sanguibacteroides_NA.2	Bacteria_Firmicutes_Clostridia_Oscillospirales_UCG.010_NA_NA.7				Bacteria_Firmicutes_Bacilli_NA_NA_NA_NA					Bacteria_NA_NA_NA_NA_NA_NA.62
Bacteria_Bacteroidota_Bacteroidia_Bacteroidales_Rikenellaceae_Alistipes_NA.4	Bacteria_Bacteroidota_Bacteroidia_Bacteroidales_Rikenellaceae_Alistipes_NA.44				Bacteria_Bacteroidota_Bacteroidia_Bacteroidales_NA_NA_NA.46					Bacteria_Actinobacteriota_Actinobacteria_Streptomycetales_Streptomycetaceae_NA_NA
Bacteria_Firmicutes_Bacilli_Erysipelotrichales_Erysipelotrichaceae_Breznakia_NA	Bacteria_NA_NA_NA_NA_NA_NA.3				Bacteria_Firmicutes_Clostridia_NA_NA_NA_NA.151					Bacteria_Firmicutes_Clostridia_ClostridiavadinBB60group_NA_NA_NA.89
Bacteria_Planctomycetota_vadinHA49_NA_NA_NA_NA	Bacteria_Firmicutes_Clostridia_Oscillospirales_Ruminococcaceae_NA_NA.74				Bacteria_Firmicutes_Clostridia_NA_NA_NA_NA.152					Bacteria_Firmicutes_Clostridia_ClostridiaUCG.014_NA_NA_NA.141
Bacteria_Verrucomicrobiota_Verrucomicrobiae_Verrucomicrobiales_Akkermansiaceae_Akkermansia_NA	Bacteria_Firmicutes_Clostridia_Peptococcales_Peptococcaceae_NA_NA.16				Bacteria_Patescibacteria_Saccharimonadia_Saccharimonadales_Saccharimonadaceae_CandidatusSaccharimonas_NA.19					Bacteria_Firmicutes_Bacilli_Lactobacillales_NA_NA_NA.17
Bacteria_Bacteroidota_Bacteroidia_Bacteroidales_Dysgonomonadaceae_NA_NA.6	Bacteria_Bacteroidota_Bacteroidia_Bacteroidales_Rikenellaceae_Alistipes_NA.47				Bacteria_Firmicutes_Clostridia_Christensenellales_Christensenellaceae_ChristensenellaceaeR.7group_NA.360					Bacteria_Firmicutes_Clostridia_Lachnospirales_Lachnospiraceae_NA_NA.133
Bacteria_Bacteroidota_Bacteroidia_Bacteroidales_NA_NA_NA.2	Bacteria_Firmicutes_NA_NA_NA_NA_NA.9				Bacteria_Firmicutes_Bacilli_Mycoplasmatales_Mycoplasmataceae_Mycoplasma_NA.4					Bacteria_Desulfobacterota_Desulfobacteria_Desulfobacterales_Desulfosarcinaceae_NA_NA.11
Bacteria_Firmicutes_BRH.c20a_NA_NA_NA_NA.1	Bacteria_Firmicutes_Bacilli_RF39_NA_NA_NA.16				Bacteria_Bacteroidota_Bacteroidia_Bacteroidales_Dysgonomonadaceae_NA_NA.69					Bacteria_Bacteroidota_Bacteroidia_Bacteroidales_Tannerellaceae_NA_NA.51
Bacteria_Bacteroidota_Bacteroidia_Bacteroidales_Tannerellaceae_Parabacteroides_NA.13	Bacteria_Firmicutes_Clostridia_Oscillospirales_Oscillospiraceae_NA_NA.14				Bacteria_Firmicutes_Clostridia_Clostridiales_NA_NA_NA					Bacteria_Verrucomicrobiota_Verrucomicrobiae_Opitutales_Opitutaceae_Diplosphaera_NA.5
Bacteria_Firmicutes_Clostridia_Oscillospirales_Ruminococcaceae_NA_NA.1	Bacteria_Firmicutes_Clostridia_Christensenellales_Christensenellaceae_NA_NA.19				Bacteria_Desulfobacterota_Desulfovibrionia_Desulfovibrionales_Desulfovibrionaceae_Desulfovibrio_NA.300
Bacteria_Firmicutes_Clostridia_Oscillospirales_Ruminococcaceae_NA_NA.2	Bacteria_Verrucomicrobiota_Lentisphaeria_Victivallales_Victivallaceae_NA_NA.4				Bacteria_Firmicutes_Clostridia_NA_NA_NA_NA.157
Bacteria_Bacteroidota_Bacteroidia_Bacteroidales_Dysgonomonadaceae_Dysgonomonas_NA.1	Bacteria_Bacteroidota_Bacteroidia_Bacteroidales_Paludibacteraceae_NA_NA.12				Bacteria_Firmicutes_Clostridia_Oscillospirales_NA_NA_NA.42
Bacteria_Firmicutes_Clostridia_Lachnospirales_Lachnospiraceae_Tyzzerella_NA	Bacteria_Bacteroidota_Bacteroidia_Bacteroidales_Dysgonomonadaceae_NA_NA.31				Bacteria_Firmicutes_Clostridia_Peptostreptococcales.Tissierellales_Anaerovoracaceae_NA_NA.60
Bacteria_Bacteroidota_Bacteroidia_Bacteroidales_Rikenellaceae_Alistipes_NA.5	Bacteria_Firmicutes_Bacilli_RF39_NA_NA_NA.21				Bacteria_Firmicutes_NA_NA_NA_NA_NA.26
Bacteria_Desulfobacterota_Desulfovibrionia_Desulfovibrionales_Desulfovibrionaceae_Desulfovibrio_NA.8	Bacteria_Firmicutes_Clostridia_Oscillospirales_Ruminococcaceae_NA_NA.105				Bacteria_Bacteroidota_Bacteroidia_NA_NA_NA_NA.2
Bacteria_Bacteroidota_Bacteroidia_Bacteroidales_Dysgonomonadaceae_NA_NA.7	Bacteria_Bacteroidota_Bacteroidia_Bacteroidales_Paludibacteraceae_NA_NA.13				Bacteria_Bacteroidota_Bacteroidia_Bacteroidales_Tannerellaceae_Parabacteroides_NA.62
Bacteria_Firmicutes_Clostridia_Oscillospirales_Butyricicoccaceae_UCG.009_NA	Bacteria_Firmicutes_Clostridia_NA_NA_NA_NA.26				Bacteria_Desulfobacterota_Desulfovibrionia_Desulfovibrionales_Desulfovibrionaceae_Desulfovibrio_NA.301
Bacteria_Firmicutes_Bacilli_Acholeplasmatales_Acholeplasmataceae_Acholeplasma_NA.2	Bacteria_Firmicutes_Clostridia_Oscillospirales_NA_NA_NA.4				Bacteria_Firmicutes_Clostridia_Christensenellales_Christensenellaceae_ChristensenellaceaeR.7group_NA.368
Bacteria_Firmicutes_Clostridia_Christensenellales_Christensenellaceae_ChristensenellaceaeR.7group_NA.3	Bacteria_Firmicutes_Clostridia_Oscillospirales_Hydrogenoanaerobacterium_NA_NA.4				Bacteria_Firmicutes_Clostridia_Oscillospirales_Ruminococcaceae_NA_NA.388
Bacteria_Bacteroidota_Bacteroidia_Bacteroidales_Rikenellaceae_Alistipes_NA.6	Bacteria_Desulfobacterota_Desulfobacteria_Desulfatiglandales_Desulfatiglandaceae_Desulfatiglans_NA				Bacteria_Acidobacteriota_Vicinamibacteria_Vicinamibacterales_Vicinamibacteraceae_NA_NA.1
Bacteria_Firmicutes_Clostridia_Christensenellales_Christensenellaceae_ChristensenellaceaeR.7group_NA.4					Bacteria_Bacteroidota_Bacteroidia_Bacteroidales_NA_NA_NA.59
Bacteria_Firmicutes_Clostridia_Peptostreptococcales.Tissierellales_Anaerovoracaceae_NA_NA.1					Bacteria_Firmicutes_Bacilli_Acholeplasmatales_Acholeplasmataceae_NA_NA
Bacteria_Desulfobacterota_Desulfovibrionia_Desulfovibrionales_Desulfovibrionaceae_Desulfovibrio_NA.10					Bacteria_Firmicutes_Clostridia_Christensenellales_Christensenellaceae_ChristensenellaceaeR.7group_NA.391
Bacteria_Firmicutes_Clostridia_Christensenellales_Christensenellaceae_NA_NA					Bacteria_NA_NA_NA_NA_NA_NA.48
Bacteria_Bacteroidota_Bacteroidia_Bacteroidales_Dysgonomonadaceae_CandidatusSymbiothrix_NA					Bacteria_Planctomycetota_vadinHA49_NA_NA_NA_NA.109
Bacteria_Firmicutes_NA_NA_NA_NA_NA					Bacteria_Firmicutes_Clostridia_Christensenellales_Christensenellaceae_ChristensenellaceaeR.7group_NA.392
Bacteria_Firmicutes_Clostridia_Christensenellales_Christensenellaceae_ChristensenellaceaeR.7group_NA.5					Bacteria_Firmicutes_Clostridia_Christensenellales_Christensenellaceae_NA_NA.172
Bacteria_Firmicutes_Clostridia_Peptostreptococcales.Tissierellales_Anaerovoracaceae_NA_NA.2					Bacteria_Synergistota_Synergistia_Synergistales_Synergistaceae_CandidatusTammella_NA.44
Bacteria_Bacteroidota_Bacteroidia_Bacteroidales_Tannerellaceae_Parabacteroides_NA.14					Bacteria_Desulfobacterota_Desulfovibrionia_Desulfovibrionales_Desulfovibrionaceae_Desulfovibrio_NA.315
Bacteria_Firmicutes_Clostridia_Oscillospirales_Ruminococcaceae_NA_NA.3					Bacteria_Proteobacteria_Gammaproteobacteria_Enterobacterales_Enterobacteriaceae_NA_NA.5
Bacteria_Firmicutes_Clostridia_Lachnospirales_Lachnospiraceae_Robinsoniella_NA.1					Bacteria_Desulfobacterota_Desulfovibrionia_Desulfovibrionales_Desulfovibrionaceae_Desulfovibrio_NA.319
Bacteria_Desulfobacterota_Desulfovibrionia_Desulfovibrionales_Desulfovibrionaceae_Desulfovibrio_NA.11					Bacteria_Bacteroidota_Bacteroidia_Bacteroidales_Paludibacteraceae_NA_NA.33
Bacteria_Desulfobacterota_Desulfovibrionia_Desulfovibrionales_Desulfovibrionaceae_Desulfovibrio_NA.12					Bacteria_Firmicutes_NA_NA_NA_NA_NA.41
Bacteria_Bacteroidota_Bacteroidia_Bacteroidales_Paludibacteraceae_NA_NA.1					Bacteria_Desulfobacterota_Desulfobacteria_Desulfobacterales_Desulfosarcinaceae_NA_NA.8
Bacteria_Firmicutes_NA_NA_NA_NA_NA.1					Bacteria_Firmicutes_Clostridia_NA_NA_NA_NA.189
Bacteria_Bacteroidota_Bacteroidia_Bacteroidales_Dysgonomonadaceae_Dysgonomonas_NA.3					Bacteria_Firmicutes_Clostridia_Oscillospirales_Ruminococcaceae_NA_NA.392
Bacteria_Desulfobacterota_Desulfovibrionia_Desulfovibrionales_Desulfovibrionaceae_Desulfovibrio_NA.13					Bacteria_Firmicutes_Clostridia_Christensenellales_Christensenellaceae_ChristensenellaceaeR.7group_NA.396
Bacteria_Firmicutes_Clostridia_Oscillospirales_Oscillospiraceae_Intestinimonas_NA					Bacteria_NA_NA_NA_NA_NA_NA.53
Bacteria_Desulfobacterota_Desulfovibrionia_Desulfovibrionales_Desulfovibrionaceae_Desulfovibrio_NA.14					Bacteria_Firmicutes_Clostridia_Oscillospirales_Oscillospiraceae_NA_NA.72
Bacteria_Firmicutes_Clostridia_Oscillospirales_Ruminococcaceae_NA_NA.4					Bacteria_Firmicutes_Clostridia_Lachnospirales_Lachnospiraceae_NA_NA.128
Bacteria_Firmicutes_Clostridia_Oscillospirales_NA_NA_NA					Bacteria_Desulfobacterota_Desulfobacteria_Desulfobacterales_NA_NA_NA.13
Bacteria_Firmicutes_Clostridia_Lachnospirales_Lachnospiraceae_Catenibacillus_NA					Bacteria_Firmicutes_Clostridia_NA_NA_NA_NA.222
Bacteria_Firmicutes_Clostridia_Oscillospirales_Ruminococcaceae_Fournierella_NA					Bacteria_Planctomycetota_vadinHA49_NA_NA_NA_NA.112
Bacteria_Bacteroidota_Bacteroidia_Bacteroidales_Tannerellaceae_CandidatusVestibaculum_NA					Bacteria_Firmicutes_Bacilli_RF39_NA_NA_NA.251
Archaea_Euryarchaeota_Methanobacteria_Methanobacteriales_Methanobacteriaceae_Methanobrevibacter_NA.1
Bacteria_Desulfobacterota_Desulfovibrionia_Desulfovibrionales_Desulfovibrionaceae_Desulfovibrio_NA.15
Bacteria_Desulfobacterota_Desulfovibrionia_Desulfovibrionales_Desulfovibrionaceae_Desulfovibrio_NA.16
Bacteria_Bacteroidota_Bacteroidia_Bacteroidales_Dysgonomonadaceae_NA_NA.9
Bacteria_Firmicutes_Clostridia_Lachnospirales_Lachnospiraceae_Tyzzerella_NA.1
Bacteria_Actinobacteriota_Coriobacteriia_Coriobacteriales_CoriobacterialesIncertaeSedis_Raoultibacter_NA
Bacteria_Bacteroidota_Bacteroidia_Bacteroidales_Tannerellaceae_Tannerella_NA
Bacteria_Firmicutes_Bacilli_Erysipelotrichales_Erysipelotrichaceae_Breznakia_NA.1
Bacteria_Spirochaetota_Spirochaetia_Spirochaetales_Spirochaetaceae_NA_NA
Bacteria_Bacteroidota_Bacteroidia_Bacteroidales_Rikenellaceae_RikenellaceaeRC9gutgroup_NA.5
Bacteria_Campilobacterota_Campylobacteria_Campylobacterales_Sulfurospirillaceae_Sulfurospirillum_NA
Bacteria_Firmicutes_NA_NA_NA_NA_NA.2
Bacteria_Firmicutes_Clostridia_Lachnospirales_Lachnospiraceae_NA_NA.6
Bacteria_Firmicutes_Clostridia_Lachnospirales_Lachnospiraceae_NA_NA.7
Bacteria_Bacteroidota_Bacteroidia_Bacteroidales_M2PB4.65termitegroup_NA_NA.5
Bacteria_Bacteroidota_Bacteroidia_Bacteroidales_Dysgonomonadaceae_Dysgonomonas_NA.4
Bacteria_Elusimicrobiota_Endomicrobia_Endomicrobiales_Endomicrobiaceae_Endomicrobium_NA
Bacteria_Firmicutes_Clostridia_Oscillospirales_Ruminococcaceae_NA_NA.5
Bacteria_Firmicutes_Clostridia_Oscillospirales_Ruminococcaceae_CandidatusSoleaferrea_NA
Bacteria_Firmicutes_Clostridia_Oscillospirales_Butyricicoccaceae_UCG.009_NA.2
Bacteria_Bacteroidota_Bacteroidia_Bacteroidales_Dysgonomonadaceae_Dysgonomonas_NA.5
Bacteria_Bacteroidota_Bacteroidia_Bacteroidales_Bacteroidaceae_Bacteroides_NA.16
Bacteria_Firmicutes_Clostridia_Christensenellales_Christensenellaceae_ChristensenellaceaeR.7group_NA.6
Bacteria_Desulfobacterota_Desulfovibrionia_Desulfovibrionales_Desulfovibrionaceae_Desulfovibrio_NA.17
Bacteria_Firmicutes_Clostridia_Oscillospirales_Ruminococcaceae_NA_NA.6
Bacteria_Firmicutes_Clostridia_Peptostreptococcales.Tissierellales_Anaerovoracaceae_Anaerovorax_NA
Bacteria_Desulfobacterota_Desulfovibrionia_Desulfovibrionales_Desulfovibrionaceae_Desulfovibrio_NA.18
Bacteria_Firmicutes_Clostridia_Lachnospirales_Lachnospiraceae_Tyzzerella_NA.3
Bacteria_Firmicutes_Bacilli_Erysipelotrichales_Erysipelatoclostridiaceae_Erysipelatoclostridium_NA.2
Bacteria_Firmicutes_Clostridia_Christensenellales_Christensenellaceae_ChristensenellaceaeR.7group_NA.7
Bacteria_Bacteroidota_Bacteroidia_Bacteroidales_Rikenellaceae_Alistipes_NA.7
Bacteria_Firmicutes_Clostridia_Peptococcales_Peptococcaceae_NA_NA
Bacteria_Firmicutes_Clostridia_Eubacteriales_Eubacteriaceae_Eubacterium_NA
Bacteria_Firmicutes_Clostridia_Oscillospirales_Ruminococcaceae_NA_NA.7
Bacteria_Firmicutes_Clostridia_Christensenellales_Christensenellaceae_ChristensenellaceaeR.7group_NA.8
Bacteria_Desulfobacterota_Desulfovibrionia_Desulfovibrionales_Desulfovibrionaceae_Desulfovibrio_NA.19
Bacteria_Proteobacteria_Alphaproteobacteria_Rhodospirillales_NA_NA_NA
Bacteria_Firmicutes_Clostridia_Lachnospirales_Lachnospiraceae_Robinsoniella_NA.2
Bacteria_Desulfobacterota_Desulfovibrionia_Desulfovibrionales_Desulfovibrionaceae_NA_NA.1
Bacteria_Firmicutes_Clostridia_Christensenellales_Christensenellaceae_ChristensenellaceaeR.7group_NA.9
Bacteria_Synergistota_Synergistia_Synergistales_Synergistaceae_NA_NA.1
Bacteria_Firmicutes_Bacilli_RsaHf231_NA_NA_NA.1
Bacteria_Bacteroidota_Bacteroidia_Bacteroidales_Rikenellaceae_Alistipes_NA.8
Bacteria_Desulfobacterota_Desulfovibrionia_Desulfovibrionales_Desulfovibrionaceae_Desulfovibrio_NA.20
Bacteria_Desulfobacterota_Desulfobacteria_Desulfobacterales_NA_NA_NA.1
Bacteria_Desulfobacterota_Desulfovibrionia_Desulfovibrionales_Desulfovibrionaceae_Desulfovibrio_NA.21
Bacteria_Bacteroidota_Bacteroidia_Bacteroidales_Rikenellaceae_Alistipes_NA.9
Bacteria_Firmicutes_Desulfitobacteriia_Desulfitobacteriales_Desulfitobacteriaceae_NA_NA
Bacteria_Bacteroidota_Bacteroidia_Bacteroidales_Tannerellaceae_Parabacteroides_NA.16
Bacteria_Actinobacteriota_Coriobacteriia_Coriobacteriales_CoriobacterialesIncertaeSedis_Raoultibacter_NA.1
Bacteria_Bacteroidota_Bacteroidia_Bacteroidales_Rikenellaceae_Alistipes_NA.10
Bacteria_Firmicutes_Clostridia_ClostridiavadinBB60group_NA_NA_NA.1
Bacteria_Desulfobacterota_Desulfovibrionia_Desulfovibrionales_Desulfovibrionaceae_Desulfovibrio_NA.22
Bacteria_Firmicutes_Clostridia_Clostridiales_Clostridiaceae_NA_NA.1
Bacteria_Firmicutes_Clostridia_Christensenellales_Christensenellaceae_ChristensenellaceaeR.7group_NA.10
Bacteria_Firmicutes_Clostridia_Oscillospirales_Ruminococcaceae_Fournierella_NA.1
Bacteria_Bacteroidota_Bacteroidia_Bacteroidales_Dysgonomonadaceae_Dysgonomonas_NA.6
Bacteria_Desulfobacterota_Desulfovibrionia_Desulfovibrionales_Desulfovibrionaceae_Desulfovibrio_NA.23
Bacteria_Firmicutes_Clostridia_Lachnospirales_Lachnospiraceae_LachnospiraceaeUCG.010_NA
Bacteria_Bacteroidota_Bacteroidia_Bacteroidales_Dysgonomonadaceae_NA_NA.13
Bacteria_Firmicutes_Clostridia_Oscillospirales_Ruminococcaceae_NA_NA.8
Bacteria_Desulfobacterota_Desulfovibrionia_Desulfovibrionales_Desulfovibrionaceae_Desulfovibrio_NA.25
Archaea_Halobacterota_Methanomicrobia_Methanomicrobiales_Methanocorpusculaceae_Methanocorpusculum_NA
Bacteria_Verrucomicrobiota_Verrucomicrobiae_Verrucomicrobiales_NA_NA_NA
Bacteria_Bacteroidota_Bacteroidia_Bacteroidales_Prolixibacteraceae_NA_NA
Bacteria_Firmicutes_Clostridia_Peptostreptococcales.Tissierellales_Anaerovoracaceae_NA_NA.3
Bacteria_Desulfobacterota_Desulfovibrionia_Desulfovibrionales_Desulfovibrionaceae_Desulfovibrio_NA.26
Bacteria_Synergistota_Synergistia_Synergistales_Synergistaceae_CandidatusTammella_NA
Bacteria_Desulfobacterota_Desulfovibrionia_Desulfovibrionales_Desulfovibrionaceae_Desulfovibrio_NA.27
Bacteria_Desulfobacterota_Desulfovibrionia_Desulfovibrionales_Desulfovibrionaceae_Desulfovibrio_NA.28
Bacteria_Firmicutes_Clostridia_Christensenellales_Christensenellaceae_ChristensenellaceaeR.7group_NA.13
Bacteria_Bacteroidota_Bacteroidia_Bacteroidales_Rikenellaceae_RikenellaceaeRC9gutgroup_NA.6
Bacteria_Firmicutes_Clostridia_Oscillospirales_Ruminococcaceae_NA_NA.10
Bacteria_Firmicutes_Clostridia_Christensenellales_Christensenellaceae_ChristensenellaceaeR.7group_NA.14
Bacteria_Firmicutes_Clostridia_Christensenellales_Christensenellaceae_ChristensenellaceaeR.7group_NA.15
Bacteria_Spirochaetota_Spirochaetia_Spirochaetales_Spirochaetaceae_Treponema_NA
Bacteria_Bacteroidota_Bacteroidia_Bacteroidales_Tannerellaceae_Parabacteroides_NA.17
Bacteria_Patescibacteria_Gracilibacteria_AbsconditabacterialesSR1_NA_NA_NA
Bacteria_Bacteroidota_Bacteroidia_Bacteroidales_Rikenellaceae_Alistipes_NA.14
Bacteria_Patescibacteria_Gracilibacteria_AbsconditabacterialesSR1_NA_NA_NA.1
Bacteria_Desulfobacterota_Desulfovibrionia_Desulfovibrionales_Desulfovibrionaceae_Desulfovibrio_NA.29
Bacteria_Desulfobacterota_Desulfovibrionia_Desulfovibrionales_Desulfovibrionaceae_NA_NA.2
Bacteria_Deferribacterota_Deferribacteres_Deferribacterales_Deferribacteraceae_Mucispirillum_NA
Bacteria_Bacteroidota_Bacteroidia_Bacteroidales_Dysgonomonadaceae_Dysgonomonas_NA.7
Bacteria_Firmicutes_Clostridia_Oscillospirales_Ruminococcaceae_IncertaeSedis_NA
Bacteria_Firmicutes_Clostridia_Lachnospirales_Lachnospiraceae_Tuzzerella_NA
Bacteria_Firmicutes_Clostridia_Oscillospirales_Ruminococcaceae_NA_NA.11
Bacteria_Bacteroidota_Bacteroidia_Bacteroidales_Rikenellaceae_RikenellaceaeRC9gutgroup_NA.7
Bacteria_Firmicutes_Clostridia_Oscillospirales_Ruminococcaceae_NA_NA.13
Bacteria_Desulfobacterota_Desulfovibrionia_Desulfovibrionales_Desulfovibrionaceae_Desulfovibrio_NA.31
Bacteria_Bacteroidota_Bacteroidia_Bacteroidales_Rikenellaceae_Alistipes_NA.15
Bacteria_Firmicutes_Clostridia_Lachnospirales_Lachnospiraceae_Tyzzerella_NA.4
Bacteria_Desulfobacterota_Desulfovibrionia_Desulfovibrionales_Desulfovibrionaceae_Desulfovibrio_NA.32
Bacteria_Proteobacteria_Gammaproteobacteria_Burkholderiales_Oxalobacteraceae_Oxalobacter_NA
Bacteria_Firmicutes_Bacilli_Erysipelotrichales_Erysipelotrichaceae_Breznakia_NA.2
Bacteria_Bacteroidota_Bacteroidia_Bacteroidales_Rikenellaceae_Alistipes_NA.16
Bacteria_Desulfobacterota_Desulfovibrionia_Desulfovibrionales_Desulfovibrionaceae_Desulfovibrio_NA.33
Bacteria_Spirochaetota_Spirochaetia_Spirochaetales_Spirochaetaceae_Sediminispirochaeta_NA.1
Bacteria_Bacteroidota_Bacteroidia_Bacteroidales_Tannerellaceae_Parabacteroides_NA.19
Bacteria_Firmicutes_Clostridia_Oscillospirales_Ruminococcaceae_Pygmaiobacter_NA
Bacteria_Bacteroidota_Bacteroidia_Bacteroidales_Tannerellaceae_Parabacteroides_NA.20
Bacteria_Firmicutes_Clostridia_Oscillospirales_Oscillospiraceae_Intestinimonas_NA.1
Bacteria_Firmicutes_Clostridia_Oscillospirales_Butyricicoccaceae_UCG.009_NA.4
Bacteria_Rs.K70termitegroup_NA_NA_NA_NA_NA.1
Bacteria_Firmicutes_Negativicutes_Acidaminococcales_Acidaminococcaceae_NA_NA
Bacteria_Desulfobacterota_Desulfovibrionia_Desulfovibrionales_Desulfovibrionaceae_Desulfovibrio_NA.34
Bacteria_Synergistota_Synergistia_Synergistales_Synergistaceae_CandidatusTammella_NA.1
Bacteria_Firmicutes_Clostridia_Peptostreptococcales.Tissierellales_Anaerovoracaceae_NA_NA.4
Bacteria_Planctomycetota_vadinHA49_NA_NA_NA_NA.1
Bacteria_Synergistota_Synergistia_Synergistales_Synergistaceae_CandidatusTammella_NA.2
Bacteria_Synergistota_Synergistia_Synergistales_Synergistaceae_CandidatusTammella_NA.3
Bacteria_Desulfobacterota_Desulfovibrionia_Desulfovibrionales_Desulfovibrionaceae_Desulfovibrio_NA.35
Bacteria_Spirochaetota_Spirochaetia_Spirochaetales_Spirochaetaceae_Sediminispirochaeta_NA.2
Bacteria_Bacteroidota_Bacteroidia_Bacteroidales_Tannerellaceae_Parabacteroides_NA.21
Bacteria_Desulfobacterota_Desulfobacteria_Desulfobacterales_Desulfosarcinaceae_NA_NA.2
Bacteria_Desulfobacterota_Desulfovibrionia_Desulfovibrionales_Desulfovibrionaceae_Desulfovibrio_NA.36
Bacteria_Bacteroidota_Bacteroidia_Bacteroidales_Rikenellaceae_Alistipes_NA.17
Bacteria_Bacteroidota_Bacteroidia_Bacteroidales_Rikenellaceae_Alistipes_NA.18
Bacteria_Bacteroidota_Bacteroidia_Bacteroidales_Rikenellaceae_Alistipes_NA.19
Bacteria_Bacteroidota_Bacteroidia_Bacteroidales_Dysgonomonadaceae_Dysgonomonas_NA.9
Bacteria_Planctomycetota_vadinHA49_NA_NA_NA_NA.2
Bacteria_Desulfobacterota_Desulfovibrionia_Desulfovibrionales_Desulfovibrionaceae_Desulfovibrio_NA.37
Bacteria_Spirochaetota_Spirochaetia_Spirochaetales_Spirochaetaceae_Sediminispirochaeta_NA.3
Bacteria_Firmicutes_Bacilli_RF39_NA_NA_NA.2
Bacteria_Firmicutes_Clostridia_Christensenellales_Christensenellaceae_NA_NA.1
Bacteria_Firmicutes_Clostridia_Christensenellales_Christensenellaceae_ChristensenellaceaeR.7group_NA.17
Bacteria_Firmicutes_Clostridia_Christensenellales_Christensenellaceae_ChristensenellaceaeR.7group_NA.18
Bacteria_Firmicutes_Clostridia_Christensenellales_Christensenellaceae_ChristensenellaceaeR.7group_NA.19
Bacteria_Desulfobacterota_Desulfovibrionia_Desulfovibrionales_Desulfovibrionaceae_Desulfovibrio_NA.39
Bacteria_Desulfobacterota_Desulfovibrionia_Desulfovibrionales_Desulfovibrionaceae_Desulfovibrio_NA.40
Bacteria_Firmicutes_Clostridia_Christensenellales_Christensenellaceae_NA_NA.2
Bacteria_Bacteroidota_Bacteroidia_Bacteroidales_NA_NA_NA.4
Bacteria_Bacteroidota_Bacteroidia_Bacteroidales_Rikenellaceae_Alistipes_NA.21
Bacteria_Desulfobacterota_Desulfovibrionia_Desulfovibrionales_Desulfovibrionaceae_Desulfovibrio_NA.41
Bacteria_Verrucomicrobiota_Verrucomicrobiae_Verrucomicrobiales_Akkermansiaceae_Akkermansia_NA.1
Bacteria_Firmicutes_Clostridia_Oscillospirales_Eubacteriumcoprostanoligenesgroup_NA_NA.1
Bacteria_Desulfobacterota_Desulfovibrionia_Desulfovibrionales_Desulfovibrionaceae_Desulfovibrio_NA.42
Bacteria_Desulfobacterota_Desulfovibrionia_Desulfovibrionales_Desulfovibrionaceae_Desulfovibrio_NA.43
Bacteria_Firmicutes_Clostridia_Oscillospirales_Ruminococcaceae_IncertaeSedis_NA.1
Bacteria_Firmicutes_Bacilli_Erysipelotrichales_Erysipelatoclostridiaceae_UCG.004_NA
Bacteria_Firmicutes_Negativicutes_Acidaminococcales_Acidaminococcaceae_NA_NA.1
Bacteria_Firmicutes_Clostridia_Oscillospirales_Ruminococcaceae_NA_NA.16
Bacteria_Firmicutes_Bacilli_Erysipelotrichales_Erysipelatoclostridiaceae_Erysipelatoclostridium_NA.6
Bacteria_Firmicutes_Clostridia_NA_NA_NA_NA.1
Bacteria_Firmicutes_Bacilli_Acholeplasmatales_Acholeplasmataceae_Acholeplasma_NA.4
Bacteria_Firmicutes_Clostridia_Christensenellales_Christensenellaceae_ChristensenellaceaeR.7group_NA.20
Bacteria_Bacteroidota_Bacteroidia_Bacteroidales_Dysgonomonadaceae_Dysgonomonas_NA.11
Bacteria_Firmicutes_Clostridia_Christensenellales_Christensenellaceae_NA_NA.3
Bacteria_Proteobacteria_Gammaproteobacteria_Pseudomonadales_Moraxellaceae_Acinetobacter_NA
Bacteria_Firmicutes_Clostridia_Lachnospirales_Lachnospiraceae_IncertaeSedis_NA.6
Bacteria_Firmicutes_Clostridia_Oscillospirales_Ruminococcaceae_NA_NA.18
Bacteria_Firmicutes_Clostridia_Oscillospirales_Ruminococcaceae_NA_NA.19
Bacteria_Firmicutes_Clostridia_Christensenellales_Christensenellaceae_NA_NA.4
Bacteria_Desulfobacterota_Desulfobacteria_Desulfobacterales_NA_NA_NA.2
Bacteria_Firmicutes_Clostridia_Oscillospirales_Ruminococcaceae_IncertaeSedis_NA.2
Bacteria_Firmicutes_Clostridia_Peptostreptococcales.Tissierellales_Anaerovoracaceae_NA_NA.5
Bacteria_Firmicutes_Clostridia_NA_NA_NA_NA.2
Bacteria_Desulfobacterota_Desulfovibrionia_Desulfovibrionales_Desulfovibrionaceae_Desulfovibrio_NA.46
Bacteria_Desulfobacterota_Desulfovibrionia_Desulfovibrionales_Desulfovibrionaceae_Desulfovibrio_NA.47
Bacteria_Firmicutes_Clostridia_Oscillospirales_Ruminococcaceae_NA_NA.20
Bacteria_Firmicutes_Clostridia_Oscillospirales_Oscillospiraceae_NK4A214group_NA
Bacteria_Firmicutes_Bacilli_Erysipelotrichales_Erysipelotrichaceae_ZOR0006_NA
Bacteria_Bacteroidota_Bacteroidia_Bacteroidales_Rikenellaceae_Rikenella_NA
Bacteria_Firmicutes_Clostridia_Christensenellales_Christensenellaceae_ChristensenellaceaeR.7group_NA.22
Bacteria_Campilobacterota_Campylobacteria_Campylobacterales_Sulfurospirillaceae_Sulfurospirillum_NA.1
Bacteria_Bacteroidota_Bacteroidia_Bacteroidales_vadinHA21_NA_NA.2
Bacteria_Desulfobacterota_Desulfovibrionia_Desulfovibrionales_Desulfovibrionaceae_Desulfovibrio_NA.48
Bacteria_Spirochaetota_Spirochaetia_Spirochaetales_Spirochaetaceae_Treponema_NA.1
Bacteria_Bacteroidota_Bacteroidia_Bacteroidales_Rikenellaceae_NA_NA.1
Bacteria_Firmicutes_Clostridia_NA_NA_NA_NA.3
Bacteria_Bacteroidota_Bacteroidia_Bacteroidales_Dysgonomonadaceae_Dysgonomonas_NA.14
Bacteria_Bacteroidota_Bacteroidia_Bacteroidales_Dysgonomonadaceae_Dysgonomonas_NA.15
Bacteria_Verrucomicrobiota_Lentisphaeria_Victivallales_Victivallaceae_NA_NA
Bacteria_Firmicutes_Clostridia_Oscillospirales_Ruminococcaceae_NA_NA.22
Bacteria_Elusimicrobiota_Endomicrobia_Endomicrobiales_Endomicrobiaceae_Endomicrobium_NA.1
Bacteria_Firmicutes_Clostridia_Oscillospirales_Ruminococcaceae_Anaerotruncus_NA
Bacteria_Firmicutes_Clostridia_Oscillospirales_UCG.010_NA_NA.1
Bacteria_Desulfobacterota_Desulfovibrionia_Desulfovibrionales_Desulfovibrionaceae_Desulfovibrio_NA.50
Bacteria_Desulfobacterota_Desulfovibrionia_Desulfovibrionales_Desulfovibrionaceae_Desulfovibrio_NA.51
Bacteria_Firmicutes_Clostridia_Oscillospirales_Ruminococcaceae_NA_NA.23
Bacteria_Firmicutes_Clostridia_Lachnospirales_Lachnospiraceae_NA_NA.12
Bacteria_Firmicutes_Clostridia_Oscillospirales_Ruminococcaceae_CandidatusSoleaferrea_NA.4
Bacteria_Bacteroidota_Bacteroidia_Bacteroidales_Rikenellaceae_Alistipes_NA.23
Bacteria_Proteobacteria_Alphaproteobacteria_Rhizobiales_Beijerinckiaceae_FFCH5858_NA
Bacteria_Bacteroidota_Bacteroidia_Bacteroidales_Tannerellaceae_Tannerella_NA.2
Bacteria_Firmicutes_Clostridia_Oscillospirales_Oscillospiraceae_Colidextribacter_NA.1
Bacteria_Firmicutes_Clostridia_Lachnospirales_Lachnospiraceae_NA_NA.13
Bacteria_Firmicutes_Clostridia_Oscillospirales_Ruminococcaceae_NA_NA.25
Bacteria_Bacteroidota_Bacteroidia_Bacteroidales_Tannerellaceae_NA_NA.5
Bacteria_Planctomycetota_vadinHA49_NA_NA_NA_NA.3
Bacteria_Firmicutes_Clostridia_Christensenellales_Christensenellaceae_ChristensenellaceaeR.7group_NA.23
Bacteria_Firmicutes_Negativicutes_Acidaminococcales_Acidaminococcaceae_NA_NA.3
Bacteria_Spirochaetota_Spirochaetia_Spirochaetales_Spirochaetaceae_Treponema_NA.2
Bacteria_Bacteroidota_Bacteroidia_Bacteroidales_Dysgonomonadaceae_Dysgonomonas_NA.17
Bacteria_Bacteroidota_Bacteroidia_Bacteroidales_Tannerellaceae_Parabacteroides_NA.23
Bacteria_Planctomycetota_Planctomycetes_Pirellulales_Pirellulaceae_Termiteplanctomycetecluster_NA
Bacteria_Elusimicrobiota_Elusimicrobia_Elusimicrobiales_Elusimicrobiaceae_Elusimicrobium_NA
Bacteria_Elusimicrobiota_Elusimicrobia_Elusimicrobiales_Elusimicrobiaceae_Elusimicrobium_NA.1
Bacteria_Firmicutes_Clostridia_Christensenellales_Christensenellaceae_NA_NA.6
Bacteria_Firmicutes_Clostridia_Christensenellales_Christensenellaceae_NA_NA.7
Bacteria_Firmicutes_Clostridia_Oscillospirales_Ruminococcaceae_NA_NA.27
Bacteria_Firmicutes_Clostridia_Christensenellales_Christensenellaceae_NA_NA.8
Bacteria_Firmicutes_Clostridia_Christensenellales_Christensenellaceae_ChristensenellaceaeR.7group_NA.27
Bacteria_Firmicutes_Bacilli_Acholeplasmatales_Acholeplasmataceae_Acholeplasma_NA.5
Bacteria_Bacteroidota_Bacteroidia_Bacteroidales_Rikenellaceae_Alistipes_NA.24
Bacteria_Synergistota_Synergistia_Synergistales_Synergistaceae_CandidatusTammella_NA.4
Bacteria_Firmicutes_Clostridia_Lachnospirales_Lachnospiraceae_NA_NA.16
Bacteria_Firmicutes_Clostridia_Christensenellales_Christensenellaceae_ChristensenellaceaeR.7group_NA.28
Bacteria_Elusimicrobiota_Endomicrobia_Endomicrobiales_Endomicrobiaceae_Endomicrobium_NA.2
Bacteria_Desulfobacterota_Desulfovibrionia_Desulfovibrionales_Desulfovibrionaceae_Desulfovibrio_NA.56
Bacteria_Firmicutes_Clostridia_ClostridiavadinBB60group_NA_NA_NA.6
Bacteria_Firmicutes_Clostridia_Christensenellales_Christensenellaceae_ChristensenellaceaeR.7group_NA.29
Bacteria_Firmicutes_Clostridia_NA_NA_NA_NA.4
Bacteria_Firmicutes_Clostridia_Lachnospirales_Lachnospiraceae_Tyzzerella_NA.8
Bacteria_Proteobacteria_Gammaproteobacteria_Burkholderiales_NA_NA_NA.1
Bacteria_Firmicutes_Clostridia_Oscillospirales_Ruminococcaceae_NA_NA.28
Bacteria_Desulfobacterota_Desulfovibrionia_Desulfovibrionales_Desulfovibrionaceae_Desulfovibrio_NA.57
Bacteria_Rs.K70termitegroup_NA_NA_NA_NA_NA.2
Bacteria_Desulfobacterota_Desulfovibrionia_Desulfovibrionales_Desulfovibrionaceae_Desulfovibrio_NA.58
Bacteria_Desulfobacterota_Desulfovibrionia_Desulfovibrionales_Desulfovibrionaceae_Desulfovibrio_NA.59
Bacteria_Actinobacteriota_Coriobacteriia_Coriobacteriales_CoriobacterialesIncertaeSedis_Raoultibacter_NA.2
Bacteria_Desulfobacterota_Desulfovibrionia_Desulfovibrionales_Desulfovibrionaceae_Desulfovibrio_NA.60
Bacteria_Firmicutes_Clostridia_Oscillospirales_Ruminococcaceae_IncertaeSedis_NA.3
Bacteria_Firmicutes_Clostridia_Peptostreptococcales.Tissierellales_Anaerovoracaceae_NA_NA.7
Bacteria_Desulfobacterota_Desulfovibrionia_Desulfovibrionales_Desulfovibrionaceae_Desulfovibrio_NA.61
Bacteria_Elusimicrobiota_Endomicrobia_Endomicrobiales_Endomicrobiaceae_Endomicrobium_NA.3
Bacteria_Bacteroidota_Bacteroidia_Bacteroidales_Rikenellaceae_NA_NA.3
Bacteria_Firmicutes_Clostridia_Oscillospirales_Ruminococcaceae_NA_NA.31
Bacteria_Firmicutes_Clostridia_Lachnospirales_Lachnospiraceae_NA_NA.18
Bacteria_Planctomycetota_vadinHA49_NA_NA_NA_NA.4
Bacteria_Firmicutes_Clostridia_Christensenellales_Christensenellaceae_ChristensenellaceaeR.7group_NA.32
Bacteria_Desulfobacterota_Desulfovibrionia_Desulfovibrionales_Desulfovibrionaceae_Desulfovibrio_NA.64
Bacteria_Firmicutes_Clostridia_Peptostreptococcales.Tissierellales_Anaerovoracaceae_NA_NA.8
Bacteria_Firmicutes_Bacilli_RF39_NA_NA_NA.4
Bacteria_Desulfobacterota_Desulfovibrionia_Desulfovibrionales_Desulfovibrionaceae_Desulfovibrio_NA.65
Bacteria_Planctomycetota_vadinHA49_NA_NA_NA_NA.5
Bacteria_Actinobacteriota_Coriobacteriia_Coriobacteriales_CoriobacterialesIncertaeSedis_NA_NA
Bacteria_Firmicutes_Clostridia_NA_NA_NA_NA.6
Bacteria_Actinobacteriota_Coriobacteriia_Coriobacteriales_CoriobacterialesIncertaeSedis_NA_NA.1
Bacteria_Firmicutes_Clostridia_Christensenellales_Christensenellaceae_NA_NA.9
Bacteria_Firmicutes_Clostridia_Oscillospirales_Ruminococcaceae_NA_NA.35
Bacteria_Firmicutes_Clostridia_Gracilibacteraceae_NA_NA_NA
Bacteria_Firmicutes_Clostridia_Christensenellales_Christensenellaceae_ChristensenellaceaeR.7group_NA.33
Bacteria_Desulfobacterota_Desulfovibrionia_Desulfovibrionales_Desulfovibrionaceae_Desulfovibrio_NA.68
Bacteria_Firmicutes_Clostridia_Eubacteriales_Anaerofustaceae_Anaerofustis_NA
Bacteria_Firmicutes_Clostridia_ClostridiaUCG.014_NA_NA_NA.4
Bacteria_Firmicutes_Clostridia_Oscillospirales_Butyricicoccaceae_UCG.009_NA.5
Bacteria_Firmicutes_Clostridia_Christensenellales_Christensenellaceae_ChristensenellaceaeR.7group_NA.34
Bacteria_Desulfobacterota_Desulfovibrionia_Desulfovibrionales_Desulfovibrionaceae_Desulfovibrio_NA.69
Bacteria_Desulfobacterota_Desulfovibrionia_Desulfovibrionales_Desulfovibrionaceae_Desulfovibrio_NA.71
Bacteria_Bacteroidota_Bacteroidia_Bacteroidales_Dysgonomonadaceae_Dysgonomonas_NA.20
Bacteria_Firmicutes_Clostridia_Christensenellales_Christensenellaceae_ChristensenellaceaeR.7group_NA.37
Bacteria_Firmicutes_Bacilli_RF39_NA_NA_NA.7
Bacteria_Firmicutes_Clostridia_Oscillospirales_Ruminococcaceae_CandidatusSoleaferrea_NA.6
Bacteria_Firmicutes_Clostridia_Peptostreptococcales.Tissierellales_Anaerovoracaceae_NA_NA.10
Bacteria_Spirochaetota_Brachyspirae_Brachyspirales_Brachyspiraceae_Brachyspira_NA
Bacteria_Deferribacterota_Deferribacteres_Deferribacterales_Deferribacteraceae_Mucispirillum_NA.1
Bacteria_Firmicutes_Clostridia_Christensenellales_Christensenellaceae_NA_NA.11
Bacteria_Firmicutes_Clostridia_ClostridiavadinBB60group_NA_NA_NA.7
Bacteria_Firmicutes_Bacilli_Erysipelotrichales_Erysipelotrichaceae_Breznakia_NA.3
Bacteria_Firmicutes_Bacilli_Erysipelotrichales_Erysipelotrichaceae_Anaerorhabdusfurcosagroup_NA.2
Bacteria_Bacteroidota_Bacteroidia_Bacteroidales_Rikenellaceae_Alistipes_NA.36
Bacteria_Firmicutes_Clostridia_NA_NA_NA_NA.8
Bacteria_Bacteroidota_Bacteroidia_Bacteroidales_Marinilabiliaceae_NA_NA.2
Bacteria_Firmicutes_Clostridia_ClostridiaUCG.014_NA_NA_NA.5
Bacteria_Firmicutes_Clostridia_ClostridiavadinBB60group_NA_NA_NA.8
Bacteria_Firmicutes_Clostridia_Christensenellales_Christensenellaceae_ChristensenellaceaeR.7group_NA.43
Bacteria_Firmicutes_Clostridia_Christensenellales_Christensenellaceae_ChristensenellaceaeR.7group_NA.45
Bacteria_Firmicutes_Clostridia_Lachnospirales_Lachnospiraceae_Tyzzerella_NA.12
Bacteria_Firmicutes_Clostridia_Oscillospirales_Ruminococcaceae_NA_NA.40
Bacteria_Desulfobacterota_Desulfovibrionia_Desulfovibrionales_Desulfovibrionaceae_Desulfovibrio_NA.79
Bacteria_Firmicutes_Clostridia_Christensenellales_Christensenellaceae_ChristensenellaceaeR.7group_NA.48
Bacteria_Firmicutes_Clostridia_Oscillospirales_Ruminococcaceae_NA_NA.42
Bacteria_Firmicutes_Clostridia_Peptococcales_Peptococcaceae_NA_NA.8
Bacteria_Firmicutes_Clostridia_Peptococcales_Peptococcaceae_NA_NA.9
Bacteria_Firmicutes_NA_NA_NA_NA_NA.4
Bacteria_Firmicutes_Clostridia_Oscillospirales_Oscillospiraceae_NA_NA.5
Bacteria_Firmicutes_Clostridia_Oscillospirales_Ruminococcaceae_Anaerotruncus_NA.1
Bacteria_Proteobacteria_Alphaproteobacteria_Rhodospirillales_NA_NA_NA.9
Bacteria_Firmicutes_Clostridia_Oscillospirales_NA_NA_NA.1
Bacteria_Desulfobacterota_Desulfarculia_Desulfarculales_NA_NA_NA
Bacteria_Firmicutes_Clostridia_Christensenellales_Christensenellaceae_ChristensenellaceaeR.7group_NA.52
Bacteria_Firmicutes_Clostridia_Oscillospirales_Ruminococcaceae_NA_NA.45
Bacteria_Desulfobacterota_Desulfovibrionia_Desulfovibrionales_Desulfovibrionaceae_NA_NA.7
Bacteria_Firmicutes_Clostridia_NA_NA_NA_NA.10
Bacteria_Desulfobacterota_Desulfovibrionia_Desulfovibrionales_Desulfovibrionaceae_Desulfovibrio_NA.88
Bacteria_Firmicutes_Clostridia_Christensenellales_Christensenellaceae_ChristensenellaceaeR.7group_NA.54
Bacteria_Planctomycetota_Planctomycetes_Pirellulales_Pirellulaceae_Termiteplanctomycetecluster_NA.5
Bacteria_Desulfobacterota_Desulfovibrionia_Desulfovibrionales_Desulfovibrionaceae_NA_NA.9
Bacteria_Firmicutes_Clostridia_Lachnospirales_Lachnospiraceae_NA_NA.21
Bacteria_Firmicutes_Clostridia_Oscillospirales_Butyricicoccaceae_UCG.009_NA.8
Bacteria_Firmicutes_Clostridia_Oscillospirales_Butyricicoccaceae_UCG.009_NA.9
Bacteria_Firmicutes_Clostridia_Oscillospirales_Ruminococcaceae_NA_NA.50
Bacteria_Bacteroidota_Bacteroidia_Bacteroidales_Paludibacteraceae_NA_NA.7
Bacteria_Firmicutes_Clostridia_Oscillospirales_Ruminococcaceae_NA_NA.52
Bacteria_Firmicutes_Clostridia_Christensenellales_Christensenellaceae_NA_NA.13
Bacteria_Firmicutes_Clostridia_Christensenellales_Christensenellaceae_ChristensenellaceaeR.7group_NA.61
Bacteria_Firmicutes_Clostridia_NA_NA_NA_NA.12
Bacteria_Firmicutes_Clostridia_Christensenellales_Christensenellaceae_ChristensenellaceaeR.7group_NA.66
Bacteria_Planctomycetota_vadinHA49_NA_NA_NA_NA.9
Bacteria_Firmicutes_Clostridia_Oscillospirales_Ruminococcaceae_NA_NA.54
Bacteria_Firmicutes_Clostridia_Peptostreptococcales.Tissierellales_Anaerovoracaceae_NA_NA.12
Bacteria_Verrucomicrobiota_Lentisphaeria_Victivallales_Victivallaceae_NA_NA.2
Bacteria_Firmicutes_Clostridia_Gracilibacteraceae_NA_NA_NA.1
Bacteria_Deferribacterota_Deferribacteres_Deferribacterales_Deferribacteraceae_Mucispirillum_NA.4
Bacteria_Desulfobacterota_Desulfovibrionia_Desulfovibrionales_Desulfovibrionaceae_NA_NA.10
Bacteria_Firmicutes_Clostridia_ClostridiavadinBB60group_NA_NA_NA.10
Bacteria_Proteobacteria_Alphaproteobacteria_NA_NA_NA_NA.1
Bacteria_Firmicutes_NA_NA_NA_NA_NA.6
Bacteria_Firmicutes_Clostridia_Oscillospirales_Ruminococcaceae_CandidatusSoleaferrea_NA.14
Bacteria_Firmicutes_Clostridia_Christensenellales_Christensenellaceae_NA_NA.16
Bacteria_Proteobacteria_Alphaproteobacteria_NA_NA_NA_NA.3
Bacteria_Firmicutes_Clostridia_Christensenellales_Christensenellaceae_ChristensenellaceaeR.7group_NA.77
Bacteria_Firmicutes_Clostridia_Peptostreptococcales.Tissierellales_Anaerovoracaceae_NA_NA.15
Bacteria_Firmicutes_Clostridia_Lachnospirales_Lachnospiraceae_Tyzzerella_NA.21
Bacteria_Firmicutes_Clostridia_Christensenellales_Christensenellaceae_NA_NA.17
Bacteria_Firmicutes_Clostridia_ClostridiavadinBB60group_NA_NA_NA.14
Bacteria_Firmicutes_Clostridia_ClostridiavadinBB60group_NA_NA_NA.15
Bacteria_Deferribacterota_Deferribacteres_Deferribacterales_Deferribacteraceae_Mucispirillum_NA.5
Bacteria_Firmicutes_Clostridia_Peptococcales_Peptococcaceae_NA_NA.12
Bacteria_Planctomycetota_vadinHA49_NA_NA_NA_NA.17
Bacteria_Firmicutes_Bacilli_RF39_NA_NA_NA.14
Bacteria_Planctomycetota_Planctomycetes_Pirellulales_Pirellulaceae_Termiteplanctomycetecluster_NA.11
Bacteria_Bacteroidota_Bacteroidia_Bacteroidales_Tannerellaceae_Tannerella_NA.5
Bacteria_Firmicutes_Clostridia_Oscillospirales_Ruminococcaceae_CandidatusSoleaferrea_NA.22
Bacteria_Deferribacterota_Deferribacteres_Deferribacterales_Deferribacteraceae_Mucispirillum_NA.7
Bacteria_Actinobacteriota_Actinobacteria_Micrococcales_NA_NA_NA
Bacteria_Spirochaetota_Spirochaetia_Spirochaetales_Spirochaetaceae_Sediminispirochaeta_NA.5
Bacteria_Firmicutes_Clostridia_Peptococcales_Peptococcaceae_NA_NA.25
Bacteria_Firmicutes_Clostridia_Peptostreptococcales.Tissierellales_Anaerovoracaceae_NA_NA.26
Bacteria_Firmicutes_Clostridia_NA_NA_NA_NA.31
Bacteria_Bacteroidota_Bacteroidia_Bacteroidales_Paludibacteraceae_NA_NA.15

## Sheet: Upset Table
	taxa	Butter	Chitin	Honey	MCC	Methylcellulose	Pectin	Starch	Tuna	WheatFlour	WhiteFlour	Xylan
1	Bacteria_Firmicutes_Clostridia_Lachnospirales_Lachnospiraceae_Lachnoclostridium_NA	1	1	1	1	1	1	1	1	1	1	1
2	Bacteria_Bacteroidota_Bacteroidia_Bacteroidales_Bacteroidaceae_Bacteroides_NA	1	1	1	1	1	1	1	1	1	1	1
3	Bacteria_Bacteroidota_Bacteroidia_Bacteroidales_vadinHA21_NA_NA	1	1	1	1	1	1	1	1	1	1	1
4	Archaea_Halobacterota_Methanosarcinia_Methanosarciniales_Methanosarcinaceae_Methanimicrococcus_NA	1	1	1	1	1	1	1	1	1	1	1
5	Bacteria_Bacteroidota_Bacteroidia_Bacteroidales_Marinifilaceae_Odoribacter_NA	1	1	1	1	1	1	1	1	1	1	1
6	Bacteria_Bacteroidota_Bacteroidia_Bacteroidales_COBP4.1termitegroup_NA_NA	1	1	1	1	1	1	1	1	1	1	1
7	Bacteria_Firmicutes_Bacilli_Lactobacillales_Enterococcaceae_NA_NA	1	1	1	1	1	1	1	1	1	1	1
8	Bacteria_Firmicutes_Bacilli_Lactobacillales_NA_NA_NA	1	1	1	1	1	0	1	1	1	1	1
9	Bacteria_Firmicutes_Clostridia_Oscillospirales_Ruminococcaceae_Ruminococcus_NA	0	1	0	1	1	1	1	0	0	0	1
10	Bacteria_Bacteroidota_Bacteroidia_Bacteroidales_Marinifilaceae_Sanguibacteroides_NA	1	1	1	1	1	1	1	1	1	1	1
11	Bacteria_Bacteroidota_Bacteroidia_Bacteroidales_Bacteroidaceae_Bacteroides_NA.1	1	1	1	1	1	1	1	1	1	1	1
12	Bacteria_Bacteroidota_Bacteroidia_Bacteroidales_Tannerellaceae_Parabacteroides_NA	1	1	1	1	1	1	1	1	1	1	1
13	Bacteria_Firmicutes_Bacilli_Lactobacillales_Enterococcaceae_Enterococcus_NA	1	1	1	1	1	1	1	1	1	1	1
14	Bacteria_Firmicutes_Clostridia_Lachnospirales_Lachnospiraceae_Lachnoclostridium_NA.1	1	1	1	1	1	1	1	1	1	1	1
15	Bacteria_Proteobacteria_Gammaproteobacteria_Enterobacterales_Enterobacteriaceae_Shimwellia_NA	1	1	1	1	1	1	1	1	1	1	1
16	Bacteria_Bacteroidota_Bacteroidia_Bacteroidales_Marinifilaceae_Odoribacter_NA.1	1	1	1	1	1	1	1	1	1	1	1
17	Bacteria_Bacteroidota_Bacteroidia_Bacteroidales_Bacteroidaceae_Bacteroides_NA.2	1	1	1	1	1	1	1	1	1	1	1
18	Bacteria_Bacteroidota_Bacteroidia_Bacteroidales_PeH15_NA_NA	1	1	1	1	1	1	1	1	1	1	1
19	Bacteria_Bacteroidota_Bacteroidia_Bacteroidales_Tannerellaceae_Parabacteroides_NA.1	1	1	1	1	1	1	1	1	1	1	1
20	Bacteria_Desulfobacterota_Desulfobacteria_Desulfobacterales_Desulfobacteraceae_Desulfobotulus_NA	1	1	1	1	1	1	1	1	1	1	1
21	Bacteria_Bacteroidota_Bacteroidia_Bacteroidales_Bacteroidaceae_Bacteroides_NA.3	1	1	1	1	1	1	1	1	1	1	1
22	Bacteria_Firmicutes_Bacilli_Lactobacillales_Lactobacillaceae_Lactobacillus_dextrinicus	1	1	1	1	1	1	1	1	1	1	1
23	Bacteria_Bacteroidota_Bacteroidia_Bacteroidales_CR.115_NA_NA	1	1	1	1	1	1	1	1	1	1	1
24	Bacteria_Bacteroidota_Bacteroidia_Bacteroidales_Bacteroidaceae_Bacteroides_NA.4	1	1	0	1	0	1	0	1	1	0	1
25	Bacteria_Firmicutes_Clostridia_Peptostreptococcales.Tissierellales_Peptostreptococcaceae_Romboutsia_NA	1	1	1	1	1	1	1	1	1	1	1
26	Bacteria_Bacteroidota_Bacteroidia_Bacteroidales_M2PB4.65termitegroup_NA_NA	1	1	1	1	1	1	1	1	1	1	1
27	Archaea_Thermoplasmatota_Thermoplasmata_Methanomassiliicoccales_Methanomethylophilaceae_CandidatusMethanogranum_NA	1	1	1	1	1	1	1	1	1	1	0
28	Bacteria_Bacteroidota_Bacteroidia_Bacteroidales_Rikenellaceae_Alistipes_NA	1	1	1	1	1	1	1	1	1	1	1
29	Bacteria_Firmicutes_Clostridia_Clostridiales_Clostridiaceae_NA_NA	1	1	1	1	1	1	1	1	1	1	1
30	Bacteria_Firmicutes_Bacilli_Lactobacillales_Enterococcaceae_Enterococcus_NA.1	1	1	1	1	1	1	1	1	1	1	1
31	Bacteria_Bacteroidota_Bacteroidia_Bacteroidales_Tannerellaceae_Parabacteroides_NA.2	1	1	1	1	1	1	1	1	1	1	1
32	Bacteria_Synergistota_Synergistia_Synergistales_Synergistaceae_NA_NA	1	1	1	1	1	1	1	1	1	1	1
33	Bacteria_Bacteroidota_Bacteroidia_Bacteroidales_Marinifilaceae_Sanguibacteroides_NA.1	1	1	1	1	1	1	1	1	1	1	1
34	Bacteria_Firmicutes_Clostridia_Lachnospirales_Lachnospiraceae_NA_NA	1	1	1	1	1	1	1	1	1	1	1
35	Bacteria_Desulfobacterota_Desulfovibrionia_Desulfovibrionales_Desulfovibrionaceae_Desulfovibrio_NA	1	1	1	1	1	1	1	1	1	1	1
36	Bacteria_Firmicutes_Bacilli_Erysipelotrichales_Erysipelotrichaceae_Breznakia_blatticola	1	1	1	1	1	1	1	1	1	1	1
37	Bacteria_Firmicutes_Clostridia_Oscillospirales_Ruminococcaceae_NA_NA	1	0	1	1	1	1	1	1	1	1	0
38	Bacteria_Bacteroidota_Bacteroidia_Bacteroidales_Rikenellaceae_Alistipes_NA.1	1	1	1	1	1	1	1	1	1	1	1
39	Bacteria_Bacteroidota_Bacteroidia_Bacteroidales_Bacteroidaceae_Bacteroides_NA.5	1	1	1	1	1	1	1	1	1	1	1
40	Bacteria_Bacteroidota_Bacteroidia_Bacteroidales_Rikenellaceae_Alistipes_NA.2	1	1	1	1	1	1	1	1	1	1	1
41	Bacteria_Desulfobacterota_Desulfobacteria_Desulfobacterales_Desulfosarcinaceae_NA_NA	1	1	1	1	1	1	1	1	1	1	1
42	Bacteria_Bacteroidota_Bacteroidia_Bacteroidales_Tannerellaceae_Parabacteroides_NA.3	1	1	1	1	1	1	1	1	1	1	0
43	Bacteria_Desulfobacterota_Desulfobacteria_Desulfobacterales_Desulfosarcinaceae_NA_NA.1	1	1	1	1	1	1	1	1	1	1	1
44	Bacteria_Firmicutes_Bacilli_Erysipelotrichales_Erysipelatoclostridiaceae_Erysipelatoclostridium_NA	1	1	1	1	1	1	1	1	1	1	1
45	Bacteria_Bacteroidota_Bacteroidia_Bacteroidales_Dysgonomonadaceae_NA_NA	1	1	1	1	1	1	1	1	1	1	1
46	Bacteria_Bacteroidota_Bacteroidia_Bacteroidales_Rikenellaceae_RikenellaceaeRC9gutgroup_NA	1	1	1	1	1	1	1	1	1	1	1
47	Bacteria_Bacteroidota_Bacteroidia_Bacteroidales_Rikenellaceae_RikenellaceaeRC9gutgroup_NA.1	1	1	1	1	1	1	1	1	1	1	1
48	Bacteria_Bacteroidota_Bacteroidia_Bacteroidales_Paludibacteraceae_Paludibacter_NA	1	1	1	1	1	1	1	1	1	1	1
49	Bacteria_Firmicutes_Bacilli_Lactobacillales_Lactobacillaceae_Lactobacillus_NA	1	1	1	1	1	1	1	1	1	1	1
50	Bacteria_Firmicutes_Bacilli_Lactobacillales_Lactobacillaceae_Lactobacillus_NA.1	1	1	1	1	1	1	1	1	1	1	1
51	Bacteria_Bacteroidota_Bacteroidia_Bacteroidales_Dysgonomonadaceae_NA_NA.1	1	1	1	1	1	1	1	1	1	1	1
52	Bacteria_Bacteroidota_Bacteroidia_Bacteroidales_Rikenellaceae_RikenellaceaeRC9gutgroup_NA.2	1	1	1	1	1	1	1	1	1	1	1
53	Bacteria_Bacteroidota_Bacteroidia_Bacteroidales_NA_NA_NA	1	1	1	1	1	1	1	1	1	1	1
54	Bacteria_Bacteroidota_Bacteroidia_Bacteroidales_Dysgonomonadaceae_NA_NA.2	1	1	1	1	1	1	1	1	1	1	1
55	Bacteria_Bacteroidota_Bacteroidia_Bacteroidales_Williamwhitmaniaceae_NA_NA	1	1	1	1	1	1	1	1	1	1	1
56	Bacteria_Fusobacteriota_Fusobacteriia_Fusobacteriales_Fusobacteriaceae_Fusobacterium_ulcerans	0	1	0	1	1	1	1	0	0	0	1
57	Bacteria_Bacteroidota_Bacteroidia_Bacteroidales_Dysgonomonadaceae_NA_NA.3	1	1	1	1	1	1	1	1	1	1	1
58	Bacteria_Fibrobacterota_Fibrobacteria_Fibrobacterales_Fibrobacteraceae_Fibrobacter_NA	1	0	1	1	0	1	0	1	1	1	0
59	Bacteria_Bacteroidota_Bacteroidia_Bacteroidales_Rikenellaceae_RikenellaceaeRC9gutgroup_NA.3	1	1	1	1	1	1	1	1	1	1	1
60	Bacteria_Bacteroidota_Bacteroidia_Bacteroidales_Marinilabiliaceae_NA_NA	1	1	1	1	1	1	1	1	1	1	1
61	Bacteria_Firmicutes_Clostridia_Christensenellales_Christensenellaceae_ChristensenellaceaeR.7group_NA	1	1	1	1	1	1	1	1	1	1	1
62	Bacteria_Bacteroidota_Bacteroidia_Bacteroidales_Bacteroidaceae_Bacteroides_NA.6	1	1	1	1	1	1	1	1	1	1	1
63	Archaea_Thermoplasmatota_Thermoplasmata_Methanomassiliicoccales_Methanomethylophilaceae_CandidatusMethanoplasma_NA	1	1	1	1	1	1	1	1	1	1	1
64	Bacteria_Desulfobacterota_Desulfovibrionia_Desulfovibrionales_Desulfovibrionaceae_Desulfovibrio_NA.1	1	1	1	1	1	1	1	1	1	1	1
65	Bacteria_Fusobacteriota_Fusobacteriia_Fusobacteriales_Fusobacteriaceae_Fusobacterium_varium	0	0	0	0	0	0	1	0	0	0	0
66	Bacteria_Bacteroidota_Bacteroidia_Bacteroidales_Bacteroidaceae_Bacteroides_NA.7	1	1	1	1	1	1	1	1	1	1	1
67	Bacteria_Bacteroidota_Bacteroidia_Bacteroidales_PeH15_NA_NA.1	1	1	1	1	1	1	1	1	1	1	0
68	Bacteria_Bacteroidota_Bacteroidia_Bacteroidales_Tannerellaceae_Parabacteroides_NA.4	1	1	1	1	1	1	1	1	1	1	1
69	Bacteria_Bacteroidota_Bacteroidia_Bacteroidales_Tannerellaceae_Parabacteroides_NA.5	1	1	1	1	1	1	1	1	1	1	1
70	Bacteria_Bacteroidota_Bacteroidia_Bacteroidales_Bacteroidaceae_Bacteroides_NA.8	1	1	1	1	1	1	1	1	1	1	1
71	Bacteria_Firmicutes_Clostridia_Peptostreptococcales.Tissierellales_Anaerovoracaceae_NA_NA	1	1	1	1	1	1	1	1	1	1	1
72	Bacteria_Firmicutes_Clostridia_Lachnospirales_Lachnospiraceae_Lachnoclostridium_NA.2	1	1	1	1	1	1	1	1	1	1	1
73	Bacteria_Bacteroidota_Bacteroidia_Bacteroidales_Tannerellaceae_NA_NA	1	1	1	1	0	1	1	1	1	1	1
74	Bacteria_Bacteroidota_Bacteroidia_Bacteroidales_Tannerellaceae_Parabacteroides_NA.6	1	1	1	1	1	1	1	1	1	1	1
75	Bacteria_Firmicutes_Bacilli_Lactobacillales_Enterococcaceae_Enterococcus_asini	1	0	1	1	1	1	0	1	1	1	0
76	Bacteria_Firmicutes_Bacilli_Lactobacillales_Lactobacillaceae_Lactobacillus_NA.2	1	1	1	1	1	1	1	1	1	1	1
77	Bacteria_Fusobacteriota_Fusobacteriia_Fusobacteriales_Fusobacteriaceae_NA_NA	1	1	1	1	1	1	1	1	1	1	1
78	Bacteria_Bacteroidota_Bacteroidia_Bacteroidales_Tannerellaceae_Parabacteroides_NA.7	1	1	1	1	1	1	1	1	1	1	1
79	Bacteria_Verrucomicrobiota_Kiritimatiellae_WCHB1.41_NA_NA_NA	1	1	1	1	1	1	1	1	1	1	0
80	Bacteria_Bacteroidota_Bacteroidia_Bacteroidales_Tannerellaceae_NA_NA.1	1	1	1	1	1	1	1	1	1	1	1
81	Bacteria_Bacteroidota_Bacteroidia_Bacteroidales_M2PB4.65termitegroup_NA_NA.1	1	1	1	1	1	1	1	1	1	1	1
82	Bacteria_Bacteroidota_Bacteroidia_Bacteroidales_M2PB4.65termitegroup_NA_NA.2	1	1	1	1	1	1	1	1	1	1	1
83	Archaea_Thermoplasmatota_Thermoplasmata_Methanomassiliicoccales_Methanomethylophilaceae_NA_NA	1	1	1	1	1	1	1	1	1	1	1
84	Bacteria_Bacteroidota_Bacteroidia_Bacteroidales_Bacteroidaceae_Bacteroides_NA.9	1	1	1	1	1	1	1	1	1	1	1
85	Bacteria_Firmicutes_Clostridia_Lachnospirales_Lachnospiraceae_Lachnoclostridium_NA.3	1	1	1	1	1	1	1	1	1	1	1
86	Bacteria_Bacteroidota_Bacteroidia_Bacteroidales_NA_NA_NA.1	1	1	1	1	1	1	1	1	1	1	1
87	Bacteria_Firmicutes_Clostridia_Oscillospirales_Oscillospiraceae_Colidextribacter_NA	1	1	1	1	1	1	1	1	1	1	1
88	Bacteria_Bacteroidota_Bacteroidia_Bacteroidales_Tannerellaceae_Parabacteroides_NA.8	1	1	1	1	1	1	1	1	1	1	1
89	Bacteria_Firmicutes_Clostridia_Lachnospirales_Lachnospiraceae_Robinsoniella_NA	1	1	1	1	1	1	1	1	1	1	1
90	Bacteria_Bacteroidota_Bacteroidia_Bacteroidales_Tannerellaceae_Parabacteroides_NA.9	1	1	1	1	1	1	1	1	1	1	1
91	Bacteria_Bacteroidota_Bacteroidia_Bacteroidales_M2PB4.65termitegroup_NA_NA.3	1	1	1	1	1	1	1	1	1	1	1
92	Bacteria_Bacteroidota_Bacteroidia_Bacteroidales_Dysgonomonadaceae_Dysgonomonas_NA	1	1	1	1	0	1	1	1	1	1	1
93	Bacteria_Firmicutes_Clostridia_Lachnospirales_Lachnospiraceae_IncertaeSedis_NA	1	0	1	1	1	1	1	1	1	1	1
94	Bacteria_Firmicutes_BRH.c20a_NA_NA_NA_NA	1	1	1	1	1	1	1	1	1	1	1
95	Bacteria_Firmicutes_Bacilli_Erysipelotrichales_Erysipelatoclostridiaceae_Erysipelatoclostridium_NA.1	1	1	1	1	1	1	1	1	1	1	1
96	Bacteria_Firmicutes_Clostridia_Lachnospirales_Lachnospiraceae_NA_NA.1	1	1	1	1	1	1	1	1	1	1	1
97	Bacteria_Desulfobacterota_Desulfovibrionia_Desulfovibrionales_Desulfovibrionaceae_Desulfovibrio_NA.2	1	1	1	1	1	1	1	1	1	1	1
98	Bacteria_Spirochaetota_Spirochaetia_Spirochaetales_Spirochaetaceae_Sediminispirochaeta_NA	1	1	1	1	1	1	1	1	1	1	1
99	Bacteria_Firmicutes_Clostridia_Lachnospirales_Lachnospiraceae_NA_NA.2	0	0	0	1	1	1	1	0	0	0	1
100	Bacteria_Firmicutes_Clostridia_Christensenellales_Christensenellaceae_ChristensenellaceaeR.7group_NA.1	1	1	1	1	1	1	1	1	1	1	1
101	Bacteria_Desulfobacterota_Desulfovibrionia_Desulfovibrionales_Desulfovibrionaceae_Desulfovibrio_NA.3	1	1	1	1	1	1	1	1	1	1	1
102	Bacteria_Bacteroidota_Bacteroidia_Bacteroidales_Bacteroidaceae_Bacteroides_NA.10	1	1	1	1	1	1	1	1	1	1	1
103	Bacteria_Firmicutes_Clostridia_Christensenellales_Christensenellaceae_ChristensenellaceaeR.7group_NA.2	1	1	1	1	1	1	1	1	1	1	1
104	Bacteria_Bacteroidota_Bacteroidia_Bacteroidales_Paludibacteraceae_NA_NA	1	1	1	1	1	1	1	1	1	1	1
105	Bacteria_Desulfobacterota_Desulfovibrionia_Desulfovibrionales_Desulfovibrionaceae_Desulfovibrio_NA.4	1	1	1	1	1	1	1	1	1	1	1
106	Bacteria_Firmicutes_Negativicutes_Acidaminococcales_Acidaminococcaceae_Phascolarctobacterium_NA	1	1	1	1	1	1	1	1	1	1	1
107	Bacteria_Firmicutes_Clostridia_Lachnospirales_Lachnospiraceae_NA_NA.3	0	0	0	0	0	0	1	0	0	0	0
108	Bacteria_Bacteroidota_Bacteroidia_Bacteroidales_Dysgonomonadaceae_NA_NA.4	1	1	1	1	1	1	1	1	1	1	1
109	Archaea_Euryarchaeota_Methanobacteria_Methanobacteriales_Methanobacteriaceae_Methanobrevibacter_NA	1	1	1	1	1	1	1	1	1	1	1
110	Bacteria_Bacteroidota_Bacteroidia_Bacteroidales_Tannerellaceae_Parabacteroides_NA.10	1	1	1	1	1	0	1	1	1	1	1
111	Bacteria_Bacteroidota_Bacteroidia_Bacteroidales_Tannerellaceae_Parabacteroides_NA.11	1	1	1	1	1	1	1	1	1	1	1
112	Bacteria_Firmicutes_Clostridia_Oscillospirales_Butyricicoccaceae_Butyricicoccus_NA	1	1	1	0	1	1	1	1	1	1	1
113	Bacteria_Bacteroidota_Bacteroidia_Bacteroidales_Bacteroidaceae_Bacteroides_NA.11	1	1	1	1	1	1	1	1	1	1	1
114	Bacteria_Firmicutes_Bacilli_Acholeplasmatales_Acholeplasmataceae_Acholeplasma_NA	1	1	1	1	1	1	1	1	1	1	1
115	Bacteria_Desulfobacterota_Desulfovibrionia_Desulfovibrionales_Desulfovibrionaceae_Desulfovibrio_NA.5	1	1	1	1	1	1	1	1	1	1	1
116	Bacteria_Desulfobacterota_Desulfobacteria_Desulfobacterales_NA_NA_NA	1	1	1	1	1	1	1	1	1	1	1
117	Bacteria_Bacteroidota_Bacteroidia_Bacteroidales_3M1PL1.52termitegroup_NA_NA	1	1	1	1	1	1	0	1	1	1	0
118	Bacteria_Firmicutes_Clostridia_Lachnospirales_Lachnospiraceae_IncertaeSedis_NA.1	1	1	1	1	1	1	1	1	1	1	1
119	Bacteria_Bacteroidota_Bacteroidia_Bacteroidales_Marinifilaceae_Odoribacter_NA.2	1	1	1	1	1	1	1	1	1	1	1
120	Bacteria_Desulfobacterota_Desulfovibrionia_Desulfovibrionales_Desulfovibrionaceae_NA_NA	1	1	1	1	1	1	1	1	1	1	1
121	Bacteria_Desulfobacterota_Desulfobulbia_Desulfobulbales_Desulfobulbaceae_Desulfobulbus_NA	0	1	1	1	1	1	1	1	1	1	1
122	Bacteria_Bacteroidota_Bacteroidia_Sphingobacteriales_NA_NA_NA	1	1	1	1	1	1	1	1	1	1	0
123	Bacteria_Bacteroidota_Bacteroidia_Bacteroidales_Tannerellaceae_Parabacteroides_NA.12	1	1	1	1	1	1	1	1	1	1	1
124	Bacteria_Bacteroidota_Bacteroidia_Bacteroidales_Rikenellaceae_RikenellaceaeRC9gutgroup_NA.4	1	1	1	1	1	1	1	1	1	1	1
125	Bacteria_Bacteroidota_Bacteroidia_Bacteroidales_Rikenellaceae_Alistipes_NA.3	1	1	1	1	1	1	1	1	1	1	1
126	Bacteria_Desulfobacterota_Desulfovibrionia_Desulfovibrionales_Desulfovibrionaceae_Desulfovibrio_NA.6	1	1	1	1	1	1	1	1	1	1	1
127	Bacteria_Firmicutes_Clostridia_Peptostreptococcales.Tissierellales_Peptostreptococcaceae_Romboutsia_NA.1	1	1	1	1	1	1	1	1	1	1	1
128	Bacteria_Firmicutes_Bacilli_Acholeplasmatales_Acholeplasmataceae_Acholeplasma_NA.1	1	1	1	1	1	1	1	1	1	1	1
129	Bacteria_Firmicutes_Clostridia_Lachnospirales_Lachnospiraceae_NA_NA.4	1	1	1	1	1	1	1	1	1	1	1
130	Bacteria_Desulfobacterota_Desulfovibrionia_Desulfovibrionales_Desulfovibrionaceae_Desulfovibrio_NA.7	1	1	1	1	1	1	1	1	1	1	1
131	Bacteria_Proteobacteria_Gammaproteobacteria_Enterobacterales_NA_NA_NA	1	1	1	1	0	1	1	1	1	1	1
132	Bacteria_Bacteroidota_Bacteroidia_Bacteroidales_M2PB4.65termitegroup_NA_NA.4	1	1	1	1	1	1	1	1	1	1	1
133	Bacteria_Firmicutes_Bacilli_Erysipelotrichales_Erysipelotrichaceae_Anaerorhabdusfurcosagroup_NA	1	1	1	1	1	1	1	1	1	1	1
134	Bacteria_Firmicutes_Clostridia_Peptostreptococcales.Tissierellales_Anaerovoracaceae_FamilyXIIIAD3011group_NA	1	1	1	1	1	1	1	1	1	1	1
135	Bacteria_Bacteroidota_Bacteroidia_Bacteroidales_Bacteroidaceae_Bacteroides_NA.12	1	1	1	1	1	1	1	1	1	1	1
136	Bacteria_Firmicutes_Clostridia_Lachnospirales_Lachnospiraceae_IncertaeSedis_NA.2	1	1	1	1	1	1	1	1	1	1	1
137	Bacteria_Bacteroidota_Bacteroidia_Bacteroidales_Williamwhitmaniaceae_Rs.D38termitegroup_NA	1	1	1	1	1	1	1	1	1	1	1
138	Bacteria_Desulfobacterota_Desulfobulbia_Desulfobulbales_Desulfobulbaceae_Desulfobulbus_NA.1	1	1	1	1	1	1	1	1	1	1	0
139	Bacteria_Bacteroidota_Bacteroidia_Bacteroidales_Dysgonomonadaceae_NA_NA.5	1	1	1	1	1	1	1	1	1	1	1
140	Bacteria_Rs.K70termitegroup_NA_NA_NA_NA_NA	1	1	1	1	1	1	1	1	1	1	1
141	Bacteria_Proteobacteria_Gammaproteobacteria_Burkholderiales_NA_NA_NA	0	1	0	1	1	1	1	0	1	0	1
142	Bacteria_Bacteroidota_Bacteroidia_Bacteroidales_Marinifilaceae_Sanguibacteroides_NA.2	1	1	1	1	1	1	1	1	1	1	1
143	Bacteria_Bacteroidota_Bacteroidia_Bacteroidales_Rikenellaceae_Alistipes_NA.4	1	1	1	1	1	1	1	1	1	1	1
144	Bacteria_Firmicutes_Bacilli_Erysipelotrichales_Erysipelotrichaceae_Breznakia_NA	1	1	1	1	1	1	1	1	1	1	1
145	Bacteria_Firmicutes_Bacilli_Lactobacillales_Lactobacillaceae_Lactobacillus_NA.3	1	0	1	1	1	1	0	1	0	0	0
146	Bacteria_Planctomycetota_vadinHA49_NA_NA_NA_NA	1	1	1	1	1	1	1	1	1	1	1
147	Bacteria_Bacteroidota_Bacteroidia_Bacteroidales_Bacteroidaceae_Bacteroides_NA.13	1	1	1	1	1	1	0	1	1	1	0
148	Bacteria_Firmicutes_Bacilli_RsaHf231_NA_NA_NA	1	1	1	1	1	1	0	1	1	1	1
149	Bacteria_Verrucomicrobiota_Verrucomicrobiae_Verrucomicrobiales_Akkermansiaceae_Akkermansia_NA	1	1	1	1	1	1	1	1	1	1	1
150	Bacteria_Bacteroidota_Bacteroidia_Bacteroidales_Dysgonomonadaceae_NA_NA.6	1	1	1	1	1	1	1	1	1	1	1
151	Bacteria_Bacteroidota_Bacteroidia_Bacteroidales_NA_NA_NA.2	1	1	1	1	1	1	1	1	1	1	1
152	Bacteria_Firmicutes_BRH.c20a_NA_NA_NA_NA.1	1	1	1	1	1	1	1	1	1	1	1
153	Bacteria_Bacteroidota_Bacteroidia_Bacteroidales_Tannerellaceae_Parabacteroides_NA.13	1	1	1	1	1	1	1	1	1	1	1
154	Bacteria_Firmicutes_Clostridia_Oscillospirales_Ruminococcaceae_NA_NA.1	1	1	1	1	1	1	1	1	1	1	1
155	Bacteria_Firmicutes_Clostridia_Oscillospirales_Ruminococcaceae_NA_NA.2	1	1	1	1	1	1	1	1	1	1	1
156	Bacteria_Bacteroidota_Bacteroidia_Bacteroidales_Dysgonomonadaceae_Dysgonomonas_NA.1	1	1	1	1	1	1	1	1	1	1	1
157	Bacteria_Bacteroidota_Bacteroidia_Bacteroidales_Dysgonomonadaceae_Dysgonomonas_NA.2	1	1	1	1	1	1	0	1	1	1	1
158	Bacteria_Firmicutes_Clostridia_Lachnospirales_Lachnospiraceae_Tyzzerella_NA	1	1	1	1	1	1	1	1	1	1	1
159	Bacteria_Fusobacteriota_Fusobacteriia_Fusobacteriales_Fusobacteriaceae_NA_NA.1	1	1	0	1	1	1	1	1	1	1	1
160	Bacteria_Bacteroidota_Bacteroidia_Bacteroidales_Rikenellaceae_Alistipes_NA.5	1	1	1	1	1	1	1	1	1	1	1
161	Bacteria_Firmicutes_Bacilli_RF39_NA_NA_NA	1	1	1	0	1	1	1	1	1	1	1
162	Bacteria_Firmicutes_Clostridia_Lachnospirales_Lachnospiraceae_NA_NA.5	1	1	0	0	0	0	1	1	1	1	0
163	Bacteria_Desulfobacterota_Desulfovibrionia_Desulfovibrionales_Desulfovibrionaceae_Desulfovibrio_NA.8	1	1	1	1	1	1	1	1	1	1	1
164	Bacteria_Bacteroidota_Bacteroidia_Bacteroidales_Dysgonomonadaceae_NA_NA.7	1	1	1	1	1	1	1	1	1	1	1
165	Bacteria_Firmicutes_Clostridia_Oscillospirales_Butyricicoccaceae_UCG.009_NA	1	1	1	1	1	1	1	1	1	1	1
166	Bacteria_Bacteroidota_Bacteroidia_Bacteroidales_vadinHA21_NA_NA.1	1	1	1	1	1	1	1	1	1	1	0
167	Bacteria_Firmicutes_Bacilli_Acholeplasmatales_Acholeplasmataceae_Acholeplasma_NA.2	1	1	1	1	1	1	1	1	1	1	1
168	Bacteria_Bacteroidota_Bacteroidia_Bacteroidales_Dysgonomonadaceae_NA_NA.8	1	1	1	1	1	1	0	1	1	1	1
169	Bacteria_Firmicutes_Clostridia_Christensenellales_Christensenellaceae_ChristensenellaceaeR.7group_NA.3	1	1	1	1	1	1	1	1	1	1	1
170	Bacteria_Bacteroidota_Bacteroidia_Bacteroidales_Rikenellaceae_Alistipes_NA.6	1	1	1	1	1	1	1	1	1	1	1
171	Bacteria_Firmicutes_Clostridia_Christensenellales_Christensenellaceae_ChristensenellaceaeR.7group_NA.4	1	1	1	1	1	1	1	1	1	1	1
172	Bacteria_Desulfobacterota_Desulfovibrionia_Desulfovibrionales_Desulfovibrionaceae_Desulfovibrio_NA.9	1	1	0	1	1	1	1	0	1	0	1
173	Bacteria_Bacteroidota_Bacteroidia_Bacteroidales_Marinifilaceae_Odoribacter_NA.3	1	1	1	1	0	1	0	1	1	1	0
174	Bacteria_Firmicutes_Clostridia_Peptostreptococcales.Tissierellales_Anaerovoracaceae_NA_NA.1	1	1	1	1	1	1	1	1	1	1	1
175	Bacteria_Bacteroidota_Bacteroidia_Bacteroidales_Bacteroidaceae_Bacteroides_NA.14	1	1	1	1	1	1	1	1	1	1	0
176	Bacteria_Desulfobacterota_Desulfovibrionia_Desulfovibrionales_Desulfovibrionaceae_Desulfovibrio_NA.10	1	1	1	1	1	1	1	1	1	1	1
177	Bacteria_Firmicutes_Clostridia_Christensenellales_Christensenellaceae_NA_NA	1	1	1	1	1	1	1	1	1	1	1
178	Bacteria_Bacteroidota_Bacteroidia_Bacteroidales_Dysgonomonadaceae_CandidatusSymbiothrix_NA	1	1	1	1	1	1	1	1	1	1	1
179	Bacteria_Firmicutes_NA_NA_NA_NA_NA	1	1	1	1	1	1	1	1	1	1	1
180	Bacteria_Firmicutes_Bacilli_Lactobacillales_Streptococcaceae_Lactococcus_NA	0	1	0	1	1	1	1	0	0	1	1
181	Bacteria_Firmicutes_Clostridia_Christensenellales_Christensenellaceae_ChristensenellaceaeR.7group_NA.5	1	1	1	1	1	1	1	1	1	1	1
182	Bacteria_Firmicutes_Clostridia_Peptostreptococcales.Tissierellales_Anaerovoracaceae_NA_NA.2	1	1	1	1	1	1	1	1	1	1	1
183	Bacteria_Bacteroidota_Bacteroidia_Bacteroidales_Tannerellaceae_Parabacteroides_NA.14	1	1	1	1	1	1	1	1	1	1	1
184	Bacteria_Firmicutes_Clostridia_Oscillospirales_Butyricicoccaceae_UCG.009_NA.1	1	1	1	1	1	1	1	1	1	1	0
185	Bacteria_Firmicutes_Clostridia_Oscillospirales_Ruminococcaceae_NA_NA.3	1	1	1	1	1	1	1	1	1	1	1
186	Bacteria_Firmicutes_Clostridia_Lachnospirales_Lachnospiraceae_IncertaeSedis_NA.3	0	0	0	0	0	0	1	0	0	0	0
187	Bacteria_Firmicutes_Clostridia_Lachnospirales_Lachnospiraceae_Robinsoniella_NA.1	1	1	1	1	1	1	1	1	1	1	1
188	Bacteria_Desulfobacterota_Desulfovibrionia_Desulfovibrionales_Desulfovibrionaceae_Desulfovibrio_NA.11	1	1	1	1	1	1	1	1	1	1	1
189	Bacteria_Desulfobacterota_Desulfovibrionia_Desulfovibrionales_Desulfovibrionaceae_Desulfovibrio_NA.12	1	1	1	1	1	1	1	1	1	1	1
190	Bacteria_Bacteroidota_Bacteroidia_Bacteroidales_Paludibacteraceae_NA_NA.1	1	1	1	1	1	1	1	1	1	1	1
191	Bacteria_Firmicutes_NA_NA_NA_NA_NA.1	1	1	1	1	1	1	1	1	1	1	1
192	Bacteria_Bacteroidota_Bacteroidia_Bacteroidales_Dysgonomonadaceae_Dysgonomonas_NA.3	1	1	1	1	1	1	1	1	1	1	1
193	Bacteria_Desulfobacterota_Desulfovibrionia_Desulfovibrionales_Desulfovibrionaceae_Desulfovibrio_NA.13	1	1	1	1	1	1	1	1	1	1	1
194	Bacteria_Firmicutes_Clostridia_Oscillospirales_Oscillospiraceae_Intestinimonas_NA	1	1	1	1	1	1	1	1	1	1	1
195	Bacteria_Desulfobacterota_Desulfovibrionia_Desulfovibrionales_Desulfovibrionaceae_Desulfovibrio_NA.14	1	1	1	1	1	1	1	1	1	1	1
196	Bacteria_Firmicutes_Clostridia_Oscillospirales_Ruminococcaceae_NA_NA.4	1	1	1	1	1	1	1	1	1	1	1
197	Bacteria_Firmicutes_Clostridia_Oscillospirales_NA_NA_NA	1	1	1	1	1	1	1	1	1	1	1
198	Bacteria_Firmicutes_Clostridia_Lachnospirales_Lachnospiraceae_Catenibacillus_NA	1	1	1	1	1	1	1	1	1	1	1
199	Bacteria_Firmicutes_Clostridia_Oscillospirales_Ruminococcaceae_Fournierella_NA	1	1	1	1	1	1	1	1	1	1	1
200	Bacteria_Bacteroidota_Bacteroidia_Bacteroidales_Tannerellaceae_CandidatusVestibaculum_NA	1	1	1	1	1	1	1	1	1	1	1
201	Archaea_Euryarchaeota_Methanobacteria_Methanobacteriales_Methanobacteriaceae_Methanobrevibacter_NA.1	1	1	1	1	1	1	1	1	1	1	1
202	Bacteria_Desulfobacterota_Desulfovibrionia_Desulfovibrionales_Desulfovibrionaceae_Desulfovibrio_NA.15	1	1	1	1	1	1	1	1	1	1	1
203	Bacteria_Desulfobacterota_Desulfovibrionia_Desulfovibrionales_Desulfovibrionaceae_Desulfovibrio_NA.16	1	1	1	1	1	1	1	1	1	1	1
204	Bacteria_Campilobacterota_Campylobacteria_Campylobacterales_Arcobacteraceae_Arcobacter_NA	0	1	0	0	0	1	0	0	0	0	0
205	Bacteria_Bacteroidota_Bacteroidia_Bacteroidales_Dysgonomonadaceae_NA_NA.9	1	1	1	1	1	1	1	1	1	1	1
206	Bacteria_Firmicutes_Clostridia_Lachnospirales_Lachnospiraceae_Tyzzerella_NA.1	1	1	1	1	1	1	1	1	1	1	1
207	Bacteria_Actinobacteriota_Coriobacteriia_Coriobacteriales_CoriobacterialesIncertaeSedis_Raoultibacter_NA	1	1	1	1	1	1	1	1	1	1	1
208	Bacteria_Bacteroidota_Bacteroidia_Bacteroidales_Tannerellaceae_Tannerella_NA	1	1	1	1	1	1	1	1	1	1	1
209	Bacteria_Firmicutes_Bacilli_Erysipelotrichales_Erysipelotrichaceae_Breznakia_NA.1	1	1	1	1	1	1	1	1	1	1	1
210	Bacteria_Bacteroidota_Bacteroidia_Bacteroidales_Dysgonomonadaceae_NA_NA.10	1	1	1	1	1	1	1	1	1	1	0
211	Bacteria_Firmicutes_Clostridia_Oscillospirales_Oscillospiraceae_NA_NA	1	1	1	1	1	1	1	1	1	1	0
212	Bacteria_Spirochaetota_Spirochaetia_Spirochaetales_Spirochaetaceae_NA_NA	1	1	1	1	1	1	1	1	1	1	1
213	Bacteria_Bacteroidota_Bacteroidia_Bacteroidales_Rikenellaceae_RikenellaceaeRC9gutgroup_NA.5	1	1	1	1	1	1	1	1	1	1	1
214	Bacteria_Firmicutes_Clostridia_NA_NA_NA_NA	1	1	1	1	1	1	1	0	1	1	1
215	Bacteria_Bacteroidota_Bacteroidia_Bacteroidales_Bacteroidaceae_Bacteroides_NA.15	1	1	1	1	0	1	1	1	1	1	1
216	Bacteria_Campilobacterota_Campylobacteria_Campylobacterales_Sulfurospirillaceae_Sulfurospirillum_NA	1	1	1	1	1	1	1	1	1	1	1
217	Bacteria_Firmicutes_NA_NA_NA_NA_NA.2	1	1	1	1	1	1	1	1	1	1	1
218	Bacteria_Firmicutes_Clostridia_Lachnospirales_Lachnospiraceae_NA_NA.6	1	1	1	1	1	1	1	1	1	1	1
219	Bacteria_Firmicutes_Clostridia_Lachnospirales_Lachnospiraceae_NA_NA.7	1	1	1	1	1	1	1	1	1	1	1
220	Bacteria_Bacteroidota_Bacteroidia_Bacteroidales_M2PB4.65termitegroup_NA_NA.5	1	1	1	1	1	1	1	1	1	1	1
221	Bacteria_Bacteroidota_Bacteroidia_Bacteroidales_Dysgonomonadaceae_Dysgonomonas_NA.4	1	1	1	1	1	1	1	1	1	1	1
222	Bacteria_Elusimicrobiota_Endomicrobia_Endomicrobiales_Endomicrobiaceae_Endomicrobium_NA	1	1	1	1	1	1	1	1	1	1	1
223	Bacteria_Verrucomicrobiota_Verrucomicrobiae_LD1.PB3_NA_NA_NA	1	1	1	1	1	1	1	1	1	1	0
224	Bacteria_Firmicutes_Clostridia_Oscillospirales_Ruminococcaceae_NA_NA.5	1	1	1	1	1	1	1	1	1	1	1
225	Bacteria_Firmicutes_Clostridia_Oscillospirales_Ruminococcaceae_CandidatusSoleaferrea_NA	1	1	1	1	1	1	1	1	1	1	1
226	Bacteria_Firmicutes_Clostridia_Oscillospirales_Butyricicoccaceae_UCG.009_NA.2	1	1	1	1	1	1	1	1	1	1	1
227	Bacteria_Bacteroidota_Bacteroidia_Bacteroidales_Dysgonomonadaceae_Dysgonomonas_NA.5	1	1	1	1	1	1	1	1	1	1	1
228	Bacteria_Bacteroidota_Bacteroidia_Bacteroidales_Bacteroidaceae_Bacteroides_NA.16	1	1	1	1	1	1	1	1	1	1	1
229	Bacteria_Firmicutes_Clostridia_Christensenellales_Christensenellaceae_ChristensenellaceaeR.7group_NA.6	1	1	1	1	1	1	1	1	1	1	1
230	Bacteria_Desulfobacterota_Desulfovibrionia_Desulfovibrionales_Desulfovibrionaceae_Desulfovibrio_NA.17	1	1	1	1	1	1	1	1	1	1	1
231	Bacteria_Firmicutes_Clostridia_Oscillospirales_Ruminococcaceae_NA_NA.6	1	1	1	1	1	1	1	1	1	1	1
232	Bacteria_Firmicutes_Clostridia_Peptostreptococcales.Tissierellales_Anaerovoracaceae_Anaerovorax_NA	1	1	1	1	1	1	1	1	1	1	1
233	Bacteria_Firmicutes_Clostridia_Lachnospirales_Lachnospiraceae_Tyzzerella_NA.2	1	1	1	1	1	1	1	1	1	1	0
234	Bacteria_Desulfobacterota_Desulfovibrionia_Desulfovibrionales_Desulfovibrionaceae_Desulfovibrio_NA.18	1	1	1	1	1	1	1	1	1	1	1
235	Bacteria_Bacteroidota_Bacteroidia_Bacteroidales_M2PB4.65termitegroup_NA_NA.6	1	1	1	1	1	1	1	1	1	1	0
236	Bacteria_Firmicutes_Clostridia_Lachnospirales_Lachnospiraceae_Tyzzerella_NA.3	1	1	1	1	1	1	1	1	1	1	1
237	Bacteria_Bacteroidota_Bacteroidia_Bacteroidales_Tannerellaceae_NA_NA.2	0	1	0	1	1	1	1	0	0	0	1
238	Bacteria_Firmicutes_Bacilli_Erysipelotrichales_Erysipelatoclostridiaceae_Erysipelatoclostridium_NA.2	1	1	1	1	1	1	1	1	1	1	1
239	Bacteria_Firmicutes_Bacilli_Erysipelotrichales_Erysipelotrichaceae_Anaerorhabdusfurcosagroup_NA.1	1	1	1	1	1	1	1	0	1	1	1
240	Bacteria_Firmicutes_Clostridia_Christensenellales_Christensenellaceae_ChristensenellaceaeR.7group_NA.7	1	1	1	1	1	1	1	1	1	1	1
241	Bacteria_Firmicutes_Clostridia_ClostridiavadinBB60group_NA_NA_NA	1	1	1	1	1	1	1	1	1	1	0
242	Bacteria_Firmicutes_Clostridia_Lachnospirales_Lachnospiraceae_NA_NA.8	1	1	1	1	0	1	1	1	1	1	0
243	Bacteria_Bacteroidota_Bacteroidia_Bacteroidales_Rikenellaceae_Alistipes_NA.7	1	1	1	1	1	1	1	1	1	1	1
244	Bacteria_NA_NA_NA_NA_NA_NA	0	0	0	0	0	0	1	0	0	0	0
245	Bacteria_Firmicutes_Clostridia_Peptococcales_Peptococcaceae_NA_NA	1	1	1	1	1	1	1	1	1	1	1
246	Bacteria_Firmicutes_Clostridia_Eubacteriales_Eubacteriaceae_Eubacterium_NA	1	1	1	1	1	1	1	1	1	1	1
247	Bacteria_Firmicutes_Clostridia_Oscillospirales_Ruminococcaceae_NA_NA.7	1	1	1	1	1	1	1	1	1	1	1
248	Bacteria_Fibrobacterota_Chitinivibrionia_ChitinivibrioniaIncertaeSedis_UnknownFamily_possiblegenus02_NA	1	1	1	1	0	1	1	1	1	1	0
249	Bacteria_Firmicutes_Clostridia_Christensenellales_Christensenellaceae_ChristensenellaceaeR.7group_NA.8	1	1	1	1	1	1	1	1	1	1	1
250	Bacteria_Desulfobacterota_Desulfovibrionia_Desulfovibrionales_Desulfovibrionaceae_Desulfovibrio_NA.19	1	1	1	1	1	1	1	1	1	1	1
251	Bacteria_Proteobacteria_Alphaproteobacteria_Rhodospirillales_NA_NA_NA	1	1	1	1	1	1	1	1	1	1	1
252	Bacteria_Firmicutes_Clostridia_Lachnospirales_Lachnospiraceae_Robinsoniella_NA.2	1	1	1	1	1	1	1	1	1	1	1
253	Bacteria_Bacteroidota_Bacteroidia_Bacteroidales_Tannerellaceae_Parabacteroides_NA.15	1	0	1	0	1	0	1	1	1	1	1
254	Bacteria_Desulfobacterota_Desulfovibrionia_Desulfovibrionales_Desulfovibrionaceae_NA_NA.1	1	1	1	1	1	1	1	1	1	1	1
255	Bacteria_Firmicutes_Bacilli_Erysipelotrichales_Erysipelatoclostridiaceae_Erysipelatoclostridium_NA.3	0	1	0	1	1	1	1	0	0	0	1
256	Bacteria_Firmicutes_Clostridia_Christensenellales_Christensenellaceae_ChristensenellaceaeR.7group_NA.9	1	1	1	1	1	1	1	1	1	1	1
257	Bacteria_Synergistota_Synergistia_Synergistales_Synergistaceae_NA_NA.1	1	1	1	1	1	1	1	1	1	1	1
258	Bacteria_Firmicutes_Bacilli_RsaHf231_NA_NA_NA.1	1	1	1	1	1	1	1	1	1	1	1
259	Bacteria_Bacteroidota_Bacteroidia_Bacteroidales_Rikenellaceae_Alistipes_NA.8	1	1	1	1	1	1	1	1	1	1	1
260	Bacteria_Bacteroidota_Bacteroidia_Bacteroidales_Bacteroidaceae_Bacteroides_NA.17	0	1	0	1	1	1	1	0	0	0	1
261	Bacteria_Firmicutes_Bacilli_Erysipelotrichales_Erysipelatoclostridiaceae_Erysipelatoclostridium_NA.4	1	1	1	1	1	1	1	0	1	1	1
262	Bacteria_Desulfobacterota_Desulfovibrionia_Desulfovibrionales_Desulfovibrionaceae_Desulfovibrio_NA.20	1	1	1	1	1	1	1	1	1	1	1
263	Bacteria_Bacteroidota_Bacteroidia_Bacteroidales_Dysgonomonadaceae_NA_NA.11	0	1	0	1	1	1	1	0	0	0	1
264	Bacteria_Desulfobacterota_Desulfobacteria_Desulfobacterales_NA_NA_NA.1	1	1	1	1	1	1	1	1	1	1	1
265	Bacteria_Desulfobacterota_Desulfovibrionia_Desulfovibrionales_Desulfovibrionaceae_Desulfovibrio_NA.21	1	1	1	1	1	1	1	1	1	1	1
266	Bacteria_Bacteroidota_Bacteroidia_Bacteroidales_Rikenellaceae_Alistipes_NA.9	1	1	1	1	1	1	1	1	1	1	1
267	Bacteria_Firmicutes_Desulfitobacteriia_Desulfitobacteriales_Desulfitobacteriaceae_NA_NA	1	1	1	1	1	1	1	1	1	1	1
268	Bacteria_Bacteroidota_Bacteroidia_Bacteroidales_Tannerellaceae_Parabacteroides_NA.16	1	1	1	1	1	1	1	1	1	1	1
269	Bacteria_Bacteroidota_Bacteroidia_Bacteroidales_3M1PL1.52termitegroup_NA_NA.1	1	0	1	1	1	0	0	1	0	1	0
270	Bacteria_Actinobacteriota_Coriobacteriia_Coriobacteriales_CoriobacterialesIncertaeSedis_Raoultibacter_NA.1	1	1	1	1	1	1	1	1	1	1	1
271	Bacteria_Bacteroidota_Bacteroidia_Bacteroidales_Rikenellaceae_Alistipes_NA.10	1	1	1	1	1	1	1	1	1	1	1
272	Bacteria_Bacteroidota_Bacteroidia_Bacteroidales_Paludibacteraceae_NA_NA.2	1	1	1	1	0	0	0	1	1	1	0
273	Bacteria_Bacteroidota_Bacteroidia_Bacteroidales_Rikenellaceae_Alistipes_NA.11	1	1	1	1	1	1	1	1	1	1	0
274	Bacteria_Firmicutes_Clostridia_ClostridiavadinBB60group_NA_NA_NA.1	1	1	1	1	1	1	1	1	1	1	1
275	Bacteria_Desulfobacterota_Desulfovibrionia_Desulfovibrionales_Desulfovibrionaceae_Desulfovibrio_NA.22	1	1	1	1	1	1	1	1	1	1	1
276	Bacteria_Firmicutes_Clostridia_Clostridiales_Clostridiaceae_NA_NA.1	1	1	1	1	1	1	1	1	1	1	1
277	Bacteria_Firmicutes_Clostridia_Christensenellales_Christensenellaceae_ChristensenellaceaeR.7group_NA.10	1	1	1	1	1	1	1	1	1	1	1
278	Bacteria_Firmicutes_Bacilli_RF39_NA_NA_NA.1	1	0	1	0	0	0	0	1	1	1	0
279	Bacteria_Firmicutes_Clostridia_Oscillospirales_Ruminococcaceae_Fournierella_NA.1	1	1	1	1	1	1	1	1	1	1	1
280	Bacteria_Firmicutes_Clostridia_Christensenellales_Christensenellaceae_ChristensenellaceaeR.7group_NA.11	1	1	1	1	1	1	1	1	1	1	0
281	Bacteria_Bacteroidota_Bacteroidia_Bacteroidales_Rikenellaceae_Alistipes_NA.12	1	0	1	1	0	0	0	1	1	1	1
282	Bacteria_Firmicutes_Bacilli_Lactobacillales_NA_NA_NA.1	0	1	0	0	0	0	1	0	1	1	1
283	Bacteria_Bacteroidota_Bacteroidia_Bacteroidales_Dysgonomonadaceae_Dysgonomonas_NA.6	1	1	1	1	1	1	1	1	1	1	1
284	Bacteria_Bacteroidota_Bacteroidia_Bacteroidales_Paludibacteraceae_Paludibacter_NA.1	1	0	1	1	1	0	0	1	1	1	0
285	Bacteria_Firmicutes_Clostridia_Lachnospirales_Lachnospiraceae_LachnospiraceaeAC2044group_NA	1	1	1	1	1	1	1	0	1	1	0
286	Bacteria_Firmicutes_Clostridia_Christensenellales_Christensenellaceae_ChristensenellaceaeR.7group_NA.12	1	1	1	1	1	1	1	1	1	1	0
287	Bacteria_Bacteroidota_Bacteroidia_Bacteroidales_Rikenellaceae_Alistipes_NA.13	1	1	1	1	1	1	1	1	1	1	0
288	Bacteria_Verrucomicrobiota_Verrucomicrobiae_LD1.PB3_NA_NA_NA.1	1	1	1	1	1	1	1	1	1	1	0
289	Bacteria_Desulfobacterota_Desulfovibrionia_Desulfovibrionales_Desulfovibrionaceae_Desulfovibrio_NA.23	1	1	1	1	1	1	1	1	1	1	1
290	Bacteria_Firmicutes_Clostridia_Lachnospirales_Lachnospiraceae_LachnospiraceaeUCG.010_NA	1	1	1	1	1	1	1	1	1	1	1
291	Bacteria_Bacteroidota_Bacteroidia_Bacteroidales_Dysgonomonadaceae_NA_NA.12	1	1	1	1	1	1	0	1	1	1	1
292	Bacteria_Bacteroidota_Bacteroidia_Bacteroidales_Dysgonomonadaceae_NA_NA.13	1	1	1	1	1	1	1	1	1	1	1
293	Bacteria_Bacteroidota_Bacteroidia_Bacteroidales_M2PB4.65termitegroup_NA_NA.7	1	1	1	1	1	1	1	1	1	1	0
294	Bacteria_Bacteroidota_Bacteroidia_Bacteroidales_Dysgonomonadaceae_CandidatusArmantifilum_NA	1	1	1	1	1	1	1	0	1	1	1
295	Bacteria_Desulfobacterota_Desulfovibrionia_Desulfovibrionales_Desulfovibrionaceae_Desulfovibrio_NA.24	1	1	1	1	0	1	1	1	1	1	1
296	Bacteria_Firmicutes_Clostridia_Oscillospirales_Ruminococcaceae_NA_NA.8	1	1	1	1	1	1	1	1	1	1	1
297	Bacteria_Desulfobacterota_Desulfovibrionia_Desulfovibrionales_Desulfovibrionaceae_Desulfovibrio_NA.25	1	1	1	1	1	1	1	1	1	1	1
298	Bacteria_Firmicutes_Clostridia_Oscillospirales_Oscillospiraceae_NA_NA.1	1	1	1	1	0	1	1	0	1	1	1
299	Bacteria_Firmicutes_Clostridia_Oscillospirales_Ruminococcaceae_NA_NA.9	1	1	1	1	1	1	0	1	1	1	1
300	Bacteria_Firmicutes_Clostridia_Oscillospirales_Butyricicoccaceae_UCG.009_NA.3	1	1	1	1	1	1	1	1	1	1	0
301	Archaea_Halobacterota_Methanomicrobia_Methanomicrobiales_Methanocorpusculaceae_Methanocorpusculum_NA	1	1	1	1	1	1	1	1	1	1	1
302	Bacteria_Verrucomicrobiota_Verrucomicrobiae_Verrucomicrobiales_NA_NA_NA	1	1	1	1	1	1	1	1	1	1	1
303	Bacteria_Bacteroidota_Bacteroidia_Bacteroidales_Prolixibacteraceae_NA_NA	1	1	1	1	1	1	1	1	1	1	1
304	Bacteria_Firmicutes_Clostridia_Peptostreptococcales.Tissierellales_Anaerovoracaceae_NA_NA.3	1	1	1	1	1	1	1	1	1	1	1
305	Bacteria_Bacteroidota_Bacteroidia_Bacteroidales_NA_NA_NA.3	1	0	1	1	1	1	1	1	1	1	1
306	Bacteria_Desulfobacterota_Desulfovibrionia_Desulfovibrionales_Desulfovibrionaceae_Desulfovibrio_NA.26	1	1	1	1	1	1	1	1	1	1	1
307	Bacteria_Synergistota_Synergistia_Synergistales_Synergistaceae_CandidatusTammella_NA	1	1	1	1	1	1	1	1	1	1	1
308	Bacteria_Desulfobacterota_Desulfovibrionia_Desulfovibrionales_Desulfovibrionaceae_Desulfovibrio_NA.27	1	1	1	1	1	1	1	1	1	1	1
309	Bacteria_Desulfobacterota_Desulfovibrionia_Desulfovibrionales_Desulfovibrionaceae_Desulfovibrio_NA.28	1	1	1	1	1	1	1	1	1	1	1
310	Bacteria_Firmicutes_Clostridia_Christensenellales_Christensenellaceae_ChristensenellaceaeR.7group_NA.13	1	1	1	1	1	1	1	1	1	1	1
311	Bacteria_Bacteroidota_Bacteroidia_Bacteroidales_Rikenellaceae_RikenellaceaeRC9gutgroup_NA.6	1	1	1	1	1	1	1	1	1	1	1
312	Bacteria_Firmicutes_Clostridia_Oscillospirales_Ruminococcaceae_NA_NA.10	1	1	1	1	1	1	1	1	1	1	1
313	Bacteria_Firmicutes_Clostridia_Christensenellales_Christensenellaceae_ChristensenellaceaeR.7group_NA.14	1	1	1	1	1	1	1	1	1	1	1
314	Bacteria_Firmicutes_Clostridia_Christensenellales_Christensenellaceae_ChristensenellaceaeR.7group_NA.15	1	1	1	1	1	1	1	1	1	1	1
315	Bacteria_Spirochaetota_Spirochaetia_Spirochaetales_Spirochaetaceae_Treponema_NA	1	1	1	1	1	1	1	1	1	1	1
316	Bacteria_Bacteroidota_Bacteroidia_Bacteroidales_Tannerellaceae_Parabacteroides_NA.17	1	1	1	1	1	1	1	1	1	1	1
317	Bacteria_Firmicutes_Clostridia_Oscillospirales_Ruminococcaceae_Ruminococcus_NA.1	0	0	0	1	1	1	0	0	0	0	1
318	Bacteria_Patescibacteria_Gracilibacteria_AbsconditabacterialesSR1_NA_NA_NA	1	1	1	1	1	1	1	1	1	1	1
319	Bacteria_Bacteroidota_Bacteroidia_Bacteroidales_Rikenellaceae_Alistipes_NA.14	1	1	1	1	1	1	1	1	1	1	1
320	Bacteria_Patescibacteria_Gracilibacteria_AbsconditabacterialesSR1_NA_NA_NA.1	1	1	1	1	1	1	1	1	1	1	1
321	Bacteria_Desulfobacterota_Desulfovibrionia_Desulfovibrionales_Desulfovibrionaceae_Desulfovibrio_NA.29	1	1	1	1	1	1	1	1	1	1	1
322	Bacteria_Firmicutes_Clostridia_ClostridiavadinBB60group_NA_NA_NA.2	1	1	1	0	0	1	0	1	1	1	1
323	Bacteria_Firmicutes_Clostridia_Oscillospirales_Hydrogenoanaerobacterium_NA_NA	1	0	1	0	0	0	1	1	1	1	0
324	Bacteria_Desulfobacterota_Desulfovibrionia_Desulfovibrionales_Desulfovibrionaceae_NA_NA.2	1	1	1	1	1	1	1	1	1	1	1
325	Bacteria_Firmicutes_Bacilli_Lactobacillales_Lactobacillaceae_Lactobacillus_NA.4	1	0	0	1	1	1	0	0	1	0	1
326	Bacteria_Deferribacterota_Deferribacteres_Deferribacterales_Deferribacteraceae_Mucispirillum_NA	1	1	1	1	1	1	1	1	1	1	1
327	Bacteria_Bacteroidota_Bacteroidia_Bacteroidales_Dysgonomonadaceae_Dysgonomonas_NA.7	1	1	1	1	1	1	1	1	1	1	1
328	Bacteria_Firmicutes_Clostridia_Oscillospirales_Ruminococcaceae_IncertaeSedis_NA	1	1	1	1	1	1	1	1	1	1	1
329	Bacteria_Firmicutes_Clostridia_Lachnospirales_Lachnospiraceae_Tuzzerella_NA	1	1	1	1	1	1	1	1	1	1	1
330	Bacteria_Firmicutes_Clostridia_Oscillospirales_Ruminococcaceae_NA_NA.11	1	1	1	1	1	1	1	1	1	1	1
331	Bacteria_Firmicutes_Clostridia_Lachnospirales_Lachnospiraceae_IncertaeSedis_NA.5	1	0	1	1	0	1	1	1	1	1	1
332	Bacteria_Firmicutes_Clostridia_Oscillospirales_Ruminococcaceae_NA_NA.12	1	1	1	1	1	1	1	1	1	1	0
333	Bacteria_Desulfobacterota_Desulfovibrionia_Desulfovibrionales_Desulfovibrionaceae_Desulfovibrio_NA.30	0	1	1	1	1	1	1	1	0	0	1
334	Bacteria_Bacteroidota_Bacteroidia_Bacteroidales_Rikenellaceae_RikenellaceaeRC9gutgroup_NA.7	1	1	1	1	1	1	1	1	1	1	1
335	Bacteria_Firmicutes_Clostridia_Oscillospirales_Ruminococcaceae_NA_NA.13	1	1	1	1	1	1	1	1	1	1	1
336	Bacteria_Desulfobacterota_Desulfovibrionia_Desulfovibrionales_Desulfovibrionaceae_Desulfovibrio_NA.31	1	1	1	1	1	1	1	1	1	1	1
337	Bacteria_Firmicutes_Bacilli_Erysipelotrichales_Erysipelotrichaceae_Breznakia_pachnodae	1	0	1	0	0	1	1	1	1	1	1
338	Bacteria_Bacteroidota_Bacteroidia_Bacteroidales_Tannerellaceae_Parabacteroides_NA.18	1	1	1	1	1	1	1	1	1	1	0
339	Bacteria_Bacteroidota_Bacteroidia_Bacteroidales_Rikenellaceae_Alistipes_NA.15	1	1	1	1	1	1	1	1	1	1	1
340	Bacteria_Firmicutes_Clostridia_Lachnospirales_Lachnospiraceae_Tyzzerella_NA.4	1	1	1	1	1	1	1	1	1	1	1
341	Bacteria_Desulfobacterota_Desulfovibrionia_Desulfovibrionales_Desulfovibrionaceae_Desulfovibrio_NA.32	1	1	1	1	1	1	1	1	1	1	1
342	Bacteria_Proteobacteria_Gammaproteobacteria_Burkholderiales_Oxalobacteraceae_Oxalobacter_NA	1	1	1	1	1	1	1	1	1	1	1
343	Bacteria_Firmicutes_Clostridia_Eubacteriales_Eubacteriaceae_Eubacterium_NA.1	0	0	0	1	1	1	1	0	0	0	1
344	Bacteria_Firmicutes_Bacilli_Erysipelotrichales_Erysipelotrichaceae_Breznakia_NA.2	1	1	1	1	1	1	1	1	1	1	1
345	Bacteria_Bacteroidota_Bacteroidia_Bacteroidales_Rikenellaceae_Alistipes_NA.16	1	1	1	1	1	1	1	1	1	1	1
346	Bacteria_Desulfobacterota_Desulfovibrionia_Desulfovibrionales_Desulfovibrionaceae_Desulfovibrio_NA.33	1	1	1	1	1	1	1	1	1	1	1
347	Bacteria_Spirochaetota_Spirochaetia_Spirochaetales_Spirochaetaceae_Sediminispirochaeta_NA.1	1	1	1	1	1	1	1	1	1	1	1
348	Bacteria_Bacteroidota_Bacteroidia_Bacteroidales_Tannerellaceae_Parabacteroides_NA.19	1	1	1	1	1	1	1	1	1	1	1
349	Archaea_Euryarchaeota_Methanobacteria_Methanobacteriales_Methanobacteriaceae_Methanobrevibacter_NA.2	1	1	0	1	1	1	1	0	0	0	1
350	Bacteria_Firmicutes_Bacilli_Lactobacillales_Lactobacillaceae_Lactobacillus_NA.5	1	1	0	1	1	1	1	1	0	1	1
351	Bacteria_Firmicutes_Clostridia_Oscillospirales_Ruminococcaceae_Pygmaiobacter_NA	1	1	1	1	1	1	1	1	1	1	1
352	Bacteria_Bacteroidota_Bacteroidia_Bacteroidales_Tannerellaceae_Parabacteroides_NA.20	1	1	1	1	1	1	1	1	1	1	1
353	Bacteria_Firmicutes_Clostridia_Oscillospirales_Oscillospiraceae_Intestinimonas_NA.1	1	1	1	1	1	1	1	1	1	1	1
354	Bacteria_Firmicutes_Bacilli_Erysipelotrichales_Erysipelatoclostridiaceae_Erysipelatoclostridium_NA.5	1	1	1	1	1	1	1	1	1	1	0
355	Bacteria_Firmicutes_Clostridia_Oscillospirales_Butyricicoccaceae_UCG.009_NA.4	1	1	1	1	1	1	1	1	1	1	1
356	Bacteria_Bacteroidota_Bacteroidia_Bacteroidales_Dysgonomonadaceae_Dysgonomonas_NA.8	1	1	1	1	1	1	0	1	1	1	0
357	Bacteria_Rs.K70termitegroup_NA_NA_NA_NA_NA.1	1	1	1	1	1	1	1	1	1	1	1
358	Bacteria_Bacteroidota_Bacteroidia_Bacteroidales_3M1PL1.52termitegroup_NA_NA.2	1	0	1	1	1	0	0	1	1	1	0
359	Bacteria_Firmicutes_Negativicutes_Acidaminococcales_Acidaminococcaceae_NA_NA	1	1	1	1	1	1	1	1	1	1	1
360	Bacteria_Desulfobacterota_Desulfovibrionia_Desulfovibrionales_Desulfovibrionaceae_Desulfovibrio_NA.34	1	1	1	1	1	1	1	1	1	1	1
361	Bacteria_Synergistota_Synergistia_Synergistales_Synergistaceae_CandidatusTammella_NA.1	1	1	1	1	1	1	1	1	1	1	1
362	Bacteria_Firmicutes_Clostridia_Peptostreptococcales.Tissierellales_Anaerovoracaceae_NA_NA.4	1	1	1	1	1	1	1	1	1	1	1
363	Bacteria_Planctomycetota_vadinHA49_NA_NA_NA_NA.1	1	1	1	1	1	1	1	1	1	1	1
364	Bacteria_Synergistota_Synergistia_Synergistales_Synergistaceae_CandidatusTammella_NA.2	1	1	1	1	1	1	1	1	1	1	1
365	Bacteria_Desulfobacterota_Desulfobulbia_Desulfobulbales_Desulfobulbaceae_Desulfobulbus_NA.2	1	1	1	1	1	0	1	1	1	1	0
366	Bacteria_Synergistota_Synergistia_Synergistales_Synergistaceae_CandidatusTammella_NA.3	1	1	1	1	1	1	1	1	1	1	1
367	Bacteria_Desulfobacterota_Desulfovibrionia_Desulfovibrionales_Desulfovibrionaceae_Desulfovibrio_NA.35	1	1	1	1	1	1	1	1	1	1	1
368	Bacteria_Spirochaetota_Spirochaetia_Spirochaetales_Spirochaetaceae_Sediminispirochaeta_NA.2	1	1	1	1	1	1	1	1	1	1	1
369	Bacteria_Bacteroidota_Bacteroidia_Bacteroidales_Tannerellaceae_Parabacteroides_NA.21	1	1	1	1	1	1	1	1	1	1	1
370	Bacteria_Bacteroidota_Bacteroidia_Bacteroidales_Tannerellaceae_NA_NA.3	0	1	0	1	1	1	1	0	0	0	1
371	Bacteria_Desulfobacterota_Desulfobacteria_Desulfobacterales_Desulfosarcinaceae_NA_NA.2	1	1	1	1	1	1	1	1	1	1	1
372	Bacteria_Desulfobacterota_Desulfovibrionia_Desulfovibrionales_Desulfovibrionaceae_Desulfovibrio_NA.36	1	1	1	1	1	1	1	1	1	1	1
373	Bacteria_Bacteroidota_Bacteroidia_Bacteroidales_Rikenellaceae_Alistipes_NA.17	1	1	1	1	1	1	1	1	1	1	1
374	Bacteria_Bacteroidota_Bacteroidia_Bacteroidales_Rikenellaceae_Alistipes_NA.18	1	1	1	1	1	1	1	1	1	1	1
375	Bacteria_Bacteroidota_Bacteroidia_Bacteroidales_Rikenellaceae_Alistipes_NA.19	1	1	1	1	1	1	1	1	1	1	1
376	Bacteria_Firmicutes_Clostridia_Oscillospirales_Oscillospiraceae_Intestinimonas_NA.2	1	1	1	1	1	1	1	1	1	1	0
377	Bacteria_Bacteroidota_Bacteroidia_Bacteroidales_Dysgonomonadaceae_Dysgonomonas_NA.9	1	1	1	1	1	1	1	1	1	1	1
378	Bacteria_Planctomycetota_vadinHA49_NA_NA_NA_NA.2	1	1	1	1	1	1	1	1	1	1	1
379	Bacteria_Firmicutes_Clostridia_Christensenellales_Christensenellaceae_ChristensenellaceaeR.7group_NA.16	1	1	1	1	1	1	1	1	1	1	0
380	Bacteria_Bacteroidota_Bacteroidia_Bacteroidales_Dysgonomonadaceae_NA_NA.14	1	1	1	0	1	1	0	1	1	1	1
381	Bacteria_Desulfobacterota_Desulfovibrionia_Desulfovibrionales_Desulfovibrionaceae_Desulfovibrio_NA.37	1	1	1	1	1	1	1	1	1	1	1
382	Bacteria_Spirochaetota_Spirochaetia_Spirochaetales_Spirochaetaceae_Sediminispirochaeta_NA.3	1	1	1	1	1	1	1	1	1	1	1
383	Bacteria_Firmicutes_Clostridia_Oscillospirales_Eubacteriumcoprostanoligenesgroup_NA_NA	1	1	1	0	1	1	1	1	1	1	0
384	Bacteria_Firmicutes_Bacilli_RF39_NA_NA_NA.2	1	1	1	1	1	1	1	1	1	1	1
385	Bacteria_Firmicutes_Clostridia_Christensenellales_Christensenellaceae_NA_NA.1	1	1	1	1	1	1	1	1	1	1	1
386	Bacteria_Bacteroidota_Bacteroidia_Bacteroidales_Paludibacteraceae_NA_NA.3	1	0	1	1	0	0	0	1	1	1	0
387	Bacteria_Firmicutes_Bacilli_Lactobacillales_Enterococcaceae_NA_NA.1	1	0	0	1	1	1	0	1	0	0	1
388	Bacteria_Desulfobacterota_Desulfovibrionia_Desulfovibrionales_Desulfovibrionaceae_Desulfovibrio_NA.38	1	1	1	1	1	1	1	1	0	1	1
389	Bacteria_Firmicutes_Clostridia_Lachnospirales_Lachnospiraceae_Tyzzerella_NA.5	1	1	1	1	1	1	1	1	1	1	0
390	Bacteria_Firmicutes_Clostridia_Christensenellales_Christensenellaceae_ChristensenellaceaeR.7group_NA.17	1	1	1	1	1	1	1	1	1	1	1
391	Bacteria_Firmicutes_Clostridia_Christensenellales_Christensenellaceae_ChristensenellaceaeR.7group_NA.18	1	1	1	1	1	1	1	1	1	1	1
392	Bacteria_Bacteroidota_Bacteroidia_Bacteroidales_Rikenellaceae_Alistipes_NA.20	0	1	1	1	1	1	1	1	1	1	1
393	Bacteria_Firmicutes_Clostridia_Christensenellales_Christensenellaceae_ChristensenellaceaeR.7group_NA.19	1	1	1	1	1	1	1	1	1	1	1
394	Bacteria_Desulfobacterota_Desulfovibrionia_Desulfovibrionales_Desulfovibrionaceae_Desulfovibrio_NA.39	1	1	1	1	1	1	1	1	1	1	1
395	Bacteria_Firmicutes_Bacilli_Acholeplasmatales_Acholeplasmataceae_Acholeplasma_NA.3	1	0	1	1	0	0	1	1	1	1	0
396	Bacteria_Firmicutes_Clostridia_Lachnospirales_Lachnospiraceae_NA_NA.9	1	0	0	1	0	0	1	1	1	1	0
397	Bacteria_Firmicutes_Clostridia_Lachnospirales_Lachnospiraceae_NA_NA.10	1	0	1	0	0	0	0	1	1	1	0
398	Bacteria_Desulfobacterota_Desulfovibrionia_Desulfovibrionales_Desulfovibrionaceae_Desulfovibrio_NA.40	1	1	1	1	1	1	1	1	1	1	1
399	Bacteria_Firmicutes_Clostridia_Christensenellales_Christensenellaceae_NA_NA.2	1	1	1	1	1	1	1	1	1	1	1
400	Bacteria_Firmicutes_Clostridia_Oscillospirales_Ruminococcaceae_NA_NA.14	1	0	1	1	1	1	1	1	1	1	1
401	Bacteria_Bacteroidota_Bacteroidia_Bacteroidales_NA_NA_NA.4	1	1	1	1	1	1	1	1	1	1	1
402	Bacteria_Firmicutes_Clostridia_Lachnospirales_Lachnospiraceae_NA_NA.11	1	1	0	1	1	1	0	1	1	1	1
403	Bacteria_Bacteroidota_Bacteroidia_Bacteroidales_Rikenellaceae_Alistipes_NA.21	1	1	1	1	1	1	1	1	1	1	1
404	Bacteria_Desulfobacterota_Desulfovibrionia_Desulfovibrionales_Desulfovibrionaceae_Desulfovibrio_NA.41	1	1	1	1	1	1	1	1	1	1	1
405	Bacteria_Firmicutes_Clostridia_Oscillospirales_Ruminococcaceae_NA_NA.15	1	0	1	1	1	0	1	1	1	1	1
406	Bacteria_Bacteroidota_Bacteroidia_Bacteroidales_Dysgonomonadaceae_Dysgonomonas_NA.10	1	1	1	1	1	1	1	0	1	1	1
407	Bacteria_Bacteroidota_Bacteroidia_Bacteroidales_Dysgonomonadaceae_NA_NA.15	1	1	1	1	1	1	1	1	1	1	0
408	Bacteria_Verrucomicrobiota_Verrucomicrobiae_Verrucomicrobiales_Akkermansiaceae_Akkermansia_NA.1	1	1	1	1	1	1	1	1	1	1	1
409	Bacteria_Bacteroidota_Bacteroidia_Bacteroidales_Dysgonomonadaceae_NA_NA.16	1	1	1	1	1	1	1	1	1	1	0
410	Archaea_Euryarchaeota_Methanobacteria_Methanobacteriales_Methanobacteriaceae_Methanobrevibacter_NA.3	0	0	0	0	0	0	1	0	0	0	0
411	Bacteria_Firmicutes_Clostridia_Oscillospirales_Eubacteriumcoprostanoligenesgroup_NA_NA.1	1	1	1	1	1	1	1	1	1	1	1
412	Bacteria_Bacteroidota_Bacteroidia_Bacteroidales_M2PB4.65termitegroup_NA_NA.8	1	1	0	1	1	1	1	1	1	1	0
413	Bacteria_Firmicutes_Clostridia_Oscillospirales_Ruminococcaceae_CandidatusSoleaferrea_NA.1	1	1	1	1	1	1	1	1	1	1	0
414	Bacteria_Bacteroidota_Bacteroidia_Bacteroidales_Bacteroidaceae_Bacteroides_NA.18	1	0	1	0	0	1	1	1	1	1	1
415	Bacteria_Desulfobacterota_Desulfovibrionia_Desulfovibrionales_Desulfovibrionaceae_Desulfovibrio_NA.42	1	1	1	1	1	1	1	1	1	1	1
416	Bacteria_Desulfobacterota_Desulfovibrionia_Desulfovibrionales_Desulfovibrionaceae_Desulfovibrio_NA.43	1	1	1	1	1	1	1	1	1	1	1
417	Bacteria_Firmicutes_Clostridia_Oscillospirales_Ruminococcaceae_IncertaeSedis_NA.1	1	1	1	1	1	1	1	1	1	1	1
418	Bacteria_Bacteroidota_Bacteroidia_Bacteroidales_Tannerellaceae_NA_NA.4	0	0	0	1	0	1	0	0	0	0	1
419	Bacteria_Firmicutes_Bacilli_Erysipelotrichales_Erysipelatoclostridiaceae_UCG.004_NA	1	1	1	1	1	1	1	1	1	1	1
420	Bacteria_Firmicutes_Negativicutes_Acidaminococcales_Acidaminococcaceae_NA_NA.1	1	1	1	1	1	1	1	1	1	1	1
421	Bacteria_Bacteroidota_Bacteroidia_Bacteroidales_Rikenellaceae_NA_NA	1	0	1	1	1	1	1	1	1	1	0
422	Bacteria_Desulfobacterota_Desulfovibrionia_Desulfovibrionales_Desulfovibrionaceae_Desulfovibrio_NA.44	1	1	1	1	1	1	1	1	1	1	0
423	Bacteria_Bacteroidota_Bacteroidia_Bacteroidales_Paludibacteraceae_NA_NA.4	1	0	1	1	1	0	1	1	1	1	1
424	Bacteria_Firmicutes_Clostridia_Oscillospirales_Ruminococcaceae_NA_NA.16	1	1	1	1	1	1	1	1	1	1	1
425	Bacteria_Firmicutes_Bacilli_Erysipelotrichales_Erysipelatoclostridiaceae_Erysipelatoclostridium_NA.6	1	1	1	1	1	1	1	1	1	1	1
426	Bacteria_Firmicutes_Clostridia_NA_NA_NA_NA.1	1	1	1	1	1	1	1	1	1	1	1
427	Bacteria_Firmicutes_Clostridia_Oscillospirales_Ruminococcaceae_NA_NA.17	1	1	1	1	1	1	1	1	1	1	0
428	Bacteria_Firmicutes_Bacilli_Acholeplasmatales_Acholeplasmataceae_Acholeplasma_NA.4	1	1	1	1	1	1	1	1	1	1	1
429	Bacteria_Bacteroidota_Bacteroidia_Bacteroidales_NA_NA_NA.5	1	1	1	1	1	1	1	1	1	1	0
430	Bacteria_Firmicutes_Clostridia_Christensenellales_Christensenellaceae_ChristensenellaceaeR.7group_NA.20	1	1	1	1	1	1	1	1	1	1	1
431	Bacteria_Firmicutes_Clostridia_ClostridiavadinBB60group_NA_NA_NA.3	1	1	1	1	1	1	1	1	1	1	0
432	Bacteria_Bacteroidota_Bacteroidia_Bacteroidales_Dysgonomonadaceae_Dysgonomonas_NA.11	1	1	1	1	1	1	1	1	1	1	1
433	Bacteria_Firmicutes_Clostridia_Christensenellales_Christensenellaceae_NA_NA.3	1	1	1	1	1	1	1	1	1	1	1
434	Bacteria_Proteobacteria_Gammaproteobacteria_Pseudomonadales_Moraxellaceae_Acinetobacter_NA	1	1	1	1	1	1	1	1	1	1	1
435	Bacteria_Firmicutes_Clostridia_Lachnospirales_Lachnospiraceae_IncertaeSedis_NA.6	1	1	1	1	1	1	1	1	1	1	1
436	Bacteria_Firmicutes_Negativicutes_Acidaminococcales_Acidaminococcaceae_NA_NA.2	1	0	0	0	0	0	1	1	1	0	0
437	Bacteria_Firmicutes_Clostridia_Oscillospirales_Ruminococcaceae_NA_NA.18	1	1	1	1	1	1	1	1	1	1	1
438	Bacteria_Verrucomicrobiota_Verrucomicrobiae_NA_NA_NA_NA	1	1	1	1	1	1	1	1	1	1	0
439	Bacteria_Firmicutes_Clostridia_Oscillospirales_Ruminococcaceae_NA_NA.19	1	1	1	1	1	1	1	1	1	1	1
440	Bacteria_Firmicutes_Clostridia_Christensenellales_Christensenellaceae_NA_NA.4	1	1	1	1	1	1	1	1	1	1	1
441	Bacteria_Bacteroidota_Bacteroidia_Bacteroidales_Dysgonomonadaceae_Dysgonomonas_NA.12	1	1	1	1	0	1	1	0	1	1	1
442	Bacteria_Desulfobacterota_Desulfovibrionia_Desulfovibrionales_Desulfovibrionaceae_Desulfovibrio_NA.45	1	1	1	1	0	0	0	1	1	0	0
443	Bacteria_Desulfobacterota_Desulfobacteria_Desulfobacterales_NA_NA_NA.2	1	1	1	1	1	1	1	1	1	1	1
444	Bacteria_Firmicutes_Clostridia_Oscillospirales_Ruminococcaceae_IncertaeSedis_NA.2	1	1	1	1	1	1	1	1	1	1	1
445	Bacteria_Firmicutes_Clostridia_Peptostreptococcales.Tissierellales_Anaerovoracaceae_NA_NA.5	1	1	1	1	1	1	1	1	1	1	1
446	Bacteria_Firmicutes_Clostridia_NA_NA_NA_NA.2	1	1	1	1	1	1	1	1	1	1	1
447	Bacteria_Desulfobacterota_Desulfovibrionia_Desulfovibrionales_Desulfovibrionaceae_Desulfovibrio_NA.46	1	1	1	1	1	1	1	1	1	1	1
448	Bacteria_Firmicutes_Clostridia_Christensenellales_Christensenellaceae_ChristensenellaceaeR.7group_NA.21	1	1	1	1	1	1	1	1	1	1	0
449	Bacteria_Desulfobacterota_Desulfovibrionia_Desulfovibrionales_Desulfovibrionaceae_Desulfovibrio_NA.47	1	1	1	1	1	1	1	1	1	1	1
450	Bacteria_Firmicutes_Clostridia_Oscillospirales_Ruminococcaceae_CandidatusSoleaferrea_NA.2	1	1	1	1	1	1	1	1	1	1	0
451	Bacteria_Firmicutes_Clostridia_Oscillospirales_Hydrogenoanaerobacterium_NA_NA.1	0	1	0	1	0	0	0	0	0	0	0
452	Bacteria_Firmicutes_Clostridia_Oscillospirales_Ruminococcaceae_NA_NA.20	1	1	1	1	1	1	1	1	1	1	1
453	Bacteria_Firmicutes_Clostridia_Oscillospirales_Oscillospiraceae_NK4A214group_NA	1	1	1	1	1	1	1	1	1	1	1
454	Bacteria_Firmicutes_Bacilli_Erysipelotrichales_Erysipelotrichaceae_ZOR0006_NA	1	1	1	1	1	1	1	1	1	1	1
455	Bacteria_Bacteroidota_Bacteroidia_Bacteroidales_Rikenellaceae_Rikenella_NA	1	1	1	1	1	1	1	1	1	1	1
456	Bacteria_Bacteroidota_Bacteroidia_Bacteroidales_Dysgonomonadaceae_Dysgonomonas_NA.13	1	1	1	1	1	1	1	1	1	1	0
457	Bacteria_Firmicutes_Clostridia_Christensenellales_Christensenellaceae_ChristensenellaceaeR.7group_NA.22	1	1	1	1	1	1	1	1	1	1	1
458	Bacteria_Campilobacterota_Campylobacteria_Campylobacterales_Sulfurospirillaceae_Sulfurospirillum_NA.1	1	1	1	1	1	1	1	1	1	1	1
459	Bacteria_Bacteroidota_Bacteroidia_Bacteroidales_vadinHA21_NA_NA.2	1	1	1	1	1	1	1	1	1	1	1
460	Bacteria_Bacteroidota_Bacteroidia_Bacteroidales_Tannerellaceae_Parabacteroides_NA.22	1	0	1	0	0	0	1	1	1	1	1
461	Bacteria_Bacteroidota_Bacteroidia_Bacteroidales_Tannerellaceae_Tannerella_NA.1	1	1	1	1	0	1	1	1	1	1	1
462	Bacteria_Bacteroidota_Bacteroidia_Bacteroidales_Dysgonomonadaceae_NA_NA.18	0	0	0	0	0	0	1	0	0	0	0
463	Bacteria_Firmicutes_Clostridia_ClostridiavadinBB60group_NA_NA_NA.4	1	1	1	1	1	1	1	1	1	1	0
464	Bacteria_Desulfobacterota_Desulfovibrionia_Desulfovibrionales_Desulfovibrionaceae_Desulfovibrio_NA.48	1	1	1	1	1	1	1	1	1	1	1
465	Bacteria_Spirochaetota_Spirochaetia_Spirochaetales_Spirochaetaceae_Treponema_NA.1	1	1	1	1	1	1	1	1	1	1	1
466	Bacteria_Bacteroidota_Bacteroidia_Bacteroidales_Rikenellaceae_NA_NA.1	1	1	1	1	1	1	1	1	1	1	1
467	Bacteria_Bacteroidota_Bacteroidia_Bacteroidales_Dysgonomonadaceae_NA_NA.19	0	1	1	1	1	1	1	0	1	1	1
468	Bacteria_Firmicutes_Clostridia_NA_NA_NA_NA.3	1	1	1	1	1	1	1	1	1	1	1
469	Bacteria_Bacteroidota_Bacteroidia_Bacteroidales_Rikenellaceae_Alistipes_NA.22	1	0	1	1	0	1	1	1	1	1	1
470	Bacteria_Firmicutes_Clostridia_Oscillospirales_UCG.010_NA_NA	0	1	0	1	1	1	0	0	0	0	1
471	Bacteria_Bacteroidota_Bacteroidia_Bacteroidales_Dysgonomonadaceae_Dysgonomonas_NA.14	1	1	1	1	1	1	1	1	1	1	1
472	Bacteria_Firmicutes_Clostridia_Oscillospirales_Oscillospiraceae_Intestinimonas_NA.3	1	1	1	1	1	1	1	1	1	1	0
473	Bacteria_Bacteroidota_Bacteroidia_Bacteroidales_Dysgonomonadaceae_Dysgonomonas_NA.15	1	1	1	1	1	1	1	1	1	1	1
474	Bacteria_Verrucomicrobiota_Lentisphaeria_Victivallales_Victivallaceae_NA_NA	1	1	1	1	1	1	1	1	1	1	1
475	Bacteria_Firmicutes_Clostridia_Oscillospirales_Ruminococcaceae_NA_NA.21	1	1	1	1	1	1	0	1	1	0	0
476	Bacteria_Firmicutes_Clostridia_Oscillospirales_Ruminococcaceae_CandidatusSoleaferrea_NA.3	1	1	1	1	1	1	1	1	1	1	0
477	Bacteria_Firmicutes_Clostridia_Oscillospirales_Ruminococcaceae_NA_NA.22	1	1	1	1	1	1	1	1	1	1	1
478	Bacteria_Elusimicrobiota_Endomicrobia_Endomicrobiales_Endomicrobiaceae_Endomicrobium_NA.1	1	1	1	1	1	1	1	1	1	1	1
479	Bacteria_Firmicutes_Clostridia_Oscillospirales_Ruminococcaceae_Anaerotruncus_NA	1	1	1	1	1	1	1	1	1	1	1
480	Bacteria_Firmicutes_Clostridia_Oscillospirales_UCG.010_NA_NA.1	1	1	1	1	1	1	1	1	1	1	1
481	Bacteria_Desulfobacterota_Desulfovibrionia_Desulfovibrionales_Desulfovibrionaceae_Desulfovibrio_NA.49	1	1	1	1	1	1	1	1	1	1	0
482	Bacteria_Patescibacteria_Gracilibacteria_AbsconditabacterialesSR1_NA_NA_NA.2	1	1	1	1	1	1	1	1	1	1	0
483	Bacteria_Desulfobacterota_Desulfovibrionia_Desulfovibrionales_Desulfovibrionaceae_Desulfovibrio_NA.50	1	1	1	1	1	1	1	1	1	1	1
484	Bacteria_Bacteroidota_Bacteroidia_Bacteroidales_Dysgonomonadaceae_Dysgonomonas_NA.16	0	1	0	1	1	1	0	1	1	1	1
485	Bacteria_Spirochaetota_MVP.15_NA_NA_NA_NA	1	1	1	1	1	1	1	1	1	1	0
486	Bacteria_Desulfobacterota_Desulfovibrionia_Desulfovibrionales_Desulfovibrionaceae_Desulfovibrio_NA.51	1	1	1	1	1	1	1	1	1	1	1
487	Bacteria_Firmicutes_Clostridia_Oscillospirales_Ruminococcaceae_NA_NA.23	1	1	1	1	1	1	1	1	1	1	1
488	Bacteria_Bacteroidota_Bacteroidia_Bacteroidales_Tannerellaceae_CandidatusVestibaculum_NA.1	1	0	0	1	0	1	0	1	1	1	0
489	Bacteria_Bacteroidota_Bacteroidia_Bacteroidales_Dysgonomonadaceae_NA_NA.20	1	0	1	0	0	0	1	0	1	1	0
490	Bacteria_Firmicutes_Clostridia_Lachnospirales_Lachnospiraceae_NA_NA.12	1	1	1	1	1	1	1	1	1	1	1
491	Bacteria_Firmicutes_Clostridia_Oscillospirales_Ruminococcaceae_CandidatusSoleaferrea_NA.4	1	1	1	1	1	1	1	1	1	1	1
492	Bacteria_Verrucomicrobiota_Verrucomicrobiae_Verrucomicrobiales_Akkermansiaceae_Akkermansia_NA.2	1	1	1	1	1	1	0	1	1	1	1
493	Bacteria_Firmicutes_Clostridia_Lachnospirales_Lachnospiraceae_Tyzzerella_NA.6	1	1	1	1	1	1	1	1	1	1	0
494	Bacteria_Bacteroidota_Bacteroidia_Bacteroidales_Rikenellaceae_Alistipes_NA.23	1	1	1	1	1	1	1	1	1	1	1
495	Bacteria_Firmicutes_Clostridia_Oscillospirales_Ruminococcaceae_NA_NA.24	1	1	1	1	1	1	1	1	1	0	1
496	Bacteria_Proteobacteria_Alphaproteobacteria_Rhizobiales_Beijerinckiaceae_FFCH5858_NA	1	1	1	1	1	1	1	1	1	1	1
497	Bacteria_Firmicutes_Clostridia_Lachnospirales_Lachnospiraceae_Tyzzerella_NA.7	0	1	1	1	1	1	1	0	1	1	1
498	Bacteria_Bacteroidota_Bacteroidia_Bacteroidales_Tannerellaceae_Tannerella_NA.2	1	1	1	1	1	1	1	1	1	1	1
499	Bacteria_Bacteroidota_Bacteroidia_Bacteroidales_Dysgonomonadaceae_CandidatusSymbiothrix_NA.1	1	1	0	1	1	1	1	0	0	0	1
500	Bacteria_Firmicutes_Clostridia_Oscillospirales_Oscillospiraceae_Colidextribacter_NA.1	1	1	1	1	1	1	1	1	1	1	1
501	Bacteria_Firmicutes_Clostridia_ClostridiaUCG.014_NA_NA_NA	1	1	1	1	1	1	1	1	1	1	0
502	Bacteria_Bacteroidota_Bacteroidia_Bacteroidales_PeH15_NA_NA.2	1	1	1	1	1	1	1	1	1	1	0
503	Bacteria_Desulfobacterota_Desulfovibrionia_Desulfovibrionales_Desulfovibrionaceae_Desulfovibrio_NA.52	1	1	1	1	1	1	0	1	1	1	1
504	Bacteria_Firmicutes_Clostridia_Lachnospirales_Lachnospiraceae_NA_NA.13	1	1	1	1	1	1	1	1	1	1	1
505	Bacteria_Firmicutes_Clostridia_Oscillospirales_Ruminococcaceae_NA_NA.25	1	1	1	1	1	1	1	1	1	1	1
506	Bacteria_Firmicutes_Clostridia_ClostridiaUCG.014_NA_NA_NA.1	0	1	0	1	1	1	1	0	0	0	1
507	Bacteria_Bacteroidota_Bacteroidia_Bacteroidales_Tannerellaceae_NA_NA.5	1	1	1	1	1	1	1	1	1	1	1
508	Bacteria_Firmicutes_Clostridia_ClostridiavadinBB60group_NA_NA_NA.5	1	1	1	1	1	1	0	1	1	1	0
509	Bacteria_Planctomycetota_vadinHA49_NA_NA_NA_NA.3	1	1	1	1	1	1	1	1	1	1	1
510	Bacteria_Firmicutes_Clostridia_Christensenellales_Christensenellaceae_ChristensenellaceaeR.7group_NA.23	1	1	1	1	1	1	1	1	1	1	1
511	Bacteria_Desulfobacterota_Desulfobacteria_Desulfobacterales_Desulfosarcinaceae_Desulfosarcina_NA	1	1	1	1	1	1	1	1	1	1	0
512	Bacteria_Firmicutes_Clostridia_Christensenellales_Christensenellaceae_ChristensenellaceaeR.7group_NA.24	0	1	1	1	1	1	1	1	0	0	1
513	Bacteria_Proteobacteria_Alphaproteobacteria_Rhodospirillales_NA_NA_NA.1	1	1	1	1	1	1	1	1	1	1	0
514	Bacteria_Firmicutes_Negativicutes_Acidaminococcales_Acidaminococcaceae_NA_NA.3	1	1	1	1	1	1	1	1	1	1	1
515	Bacteria_Spirochaetota_Spirochaetia_Spirochaetales_Spirochaetaceae_Treponema_NA.2	1	1	1	1	1	1	1	1	1	1	1
516	Bacteria_Spirochaetota_Spirochaetia_Spirochaetales_Spirochaetaceae_NA_NA.1	1	1	1	0	1	1	1	1	1	1	1
517	Bacteria_Firmicutes_Bacilli_Erysipelotrichales_Erysipelatoclostridiaceae_UCG.004_NA.1	1	0	1	1	0	1	0	1	1	1	0
518	Bacteria_Bacteroidota_Bacteroidia_Bacteroidales_Dysgonomonadaceae_Dysgonomonas_NA.17	1	1	1	1	1	1	1	1	1	1	1
519	Bacteria_Bacteroidota_Bacteroidia_Bacteroidales_MgMjR.022_NA_NA	1	0	1	1	1	0	1	1	1	1	0
520	Bacteria_Bacteroidota_Bacteroidia_Bacteroidales_Tannerellaceae_Parabacteroides_NA.23	1	1	1	1	1	1	1	1	1	1	1
521	Bacteria_Firmicutes_Clostridia_Lachnospirales_Lachnospiraceae_NA_NA.14	1	1	1	0	1	1	1	1	1	1	0
522	Bacteria_Firmicutes_Clostridia_Lachnospirales_Lachnospiraceae_NA_NA.15	1	0	1	1	0	1	1	1	1	1	1
523	Bacteria_Bacteroidota_Bacteroidia_Bacteroidales_Dysgonomonadaceae_Dysgonomonas_NA.18	1	0	1	0	0	0	0	1	1	1	0
524	Bacteria_Planctomycetota_Planctomycetes_Pirellulales_Pirellulaceae_Termiteplanctomycetecluster_NA	1	1	1	1	1	1	1	1	1	1	1
525	Bacteria_Desulfobacterota_Desulfovibrionia_Desulfovibrionales_Desulfovibrionaceae_Desulfovibrio_NA.53	0	1	0	1	1	1	1	1	0	1	1
526	Bacteria_Bacteroidota_Bacteroidia_Bacteroidales_Paludibacteraceae_H1_NA	1	1	1	1	0	1	1	1	1	1	1
527	Bacteria_Bacteroidota_Bacteroidia_Bacteroidales_Rikenellaceae_RikenellaceaeRC9gutgroup_NA.8	0	1	0	1	1	1	1	0	0	0	1
528	Bacteria_Elusimicrobiota_Elusimicrobia_Elusimicrobiales_Elusimicrobiaceae_Elusimicrobium_NA	1	1	1	1	1	1	1	1	1	1	1
529	Bacteria_Desulfobacterota_Desulfovibrionia_Desulfovibrionales_Desulfovibrionaceae_Desulfovibrio_NA.54	1	1	1	1	1	1	1	1	1	0	1
530	Bacteria_Firmicutes_Negativicutes_Acidaminococcales_Acidaminococcaceae_NA_NA.4	1	1	1	1	1	1	1	1	1	1	0
531	Bacteria_Bacteroidota_Bacteroidia_Bacteroidales_Bacteroidaceae_Bacteroides_NA.19	1	1	1	1	1	0	1	1	1	1	1
532	Bacteria_Firmicutes_Clostridia_Christensenellales_Christensenellaceae_NA_NA.5	1	1	1	1	1	1	1	1	1	1	0
533	Bacteria_Desulfobacterota_Desulfovibrionia_Desulfovibrionales_Desulfovibrionaceae_Desulfovibrio_NA.55	1	1	1	1	0	0	1	1	1	1	0
534	Bacteria_Firmicutes_Clostridia_Oscillospirales_Oscillospiraceae_Colidextribacter_NA.2	0	1	1	1	1	1	1	1	1	0	1
535	Bacteria_Firmicutes_Clostridia_Christensenellales_Christensenellaceae_ChristensenellaceaeR.7group_NA.25	1	1	0	0	1	1	1	1	1	1	0
536	Bacteria_Firmicutes_Clostridia_Oscillospirales_UCG.010_NA_NA.2	1	1	1	1	1	1	1	1	1	1	0
537	Bacteria_Bacteroidota_Bacteroidia_Bacteroidales_Dysgonomonadaceae_Dysgonomonas_NA.19	1	1	1	1	0	0	1	1	1	1	1
538	Bacteria_Elusimicrobiota_Elusimicrobia_Elusimicrobiales_Elusimicrobiaceae_Elusimicrobium_NA.1	1	1	1	1	1	1	1	1	1	1	1
539	Bacteria_Firmicutes_Clostridia_Christensenellales_Christensenellaceae_NA_NA.6	1	1	1	1	1	1	1	1	1	1	1
540	Bacteria_Bacteroidota_Bacteroidia_Bacteroidales_Tannerellaceae_NA_NA.6	1	0	1	1	0	1	0	1	1	1	0
541	Bacteria_Firmicutes_Clostridia_Christensenellales_Christensenellaceae_NA_NA.7	1	1	1	1	1	1	1	1	1	1	1
542	Bacteria_Firmicutes_Clostridia_Christensenellales_Christensenellaceae_ChristensenellaceaeR.7group_NA.26	1	1	1	1	0	1	1	1	1	1	0
543	Bacteria_Firmicutes_Clostridia_Oscillospirales_Ruminococcaceae_NA_NA.26	1	0	1	1	1	1	1	0	1	1	1
544	Bacteria_Firmicutes_Clostridia_Oscillospirales_Eubacteriumcoprostanoligenesgroup_NA_NA.2	1	1	1	1	1	1	1	1	1	1	0
545	Bacteria_Bacteroidota_Bacteroidia_Bacteroidales_COBP4.1termitegroup_NA_NA.1	1	1	1	1	1	1	1	0	1	1	1
546	Bacteria_Bacteroidota_Bacteroidia_Flavobacteriales_NA_NA_NA	0	1	1	1	1	1	1	1	0	1	1
547	Bacteria_Firmicutes_Clostridia_Oscillospirales_Ruminococcaceae_NA_NA.27	1	1	1	1	1	1	1	1	1	1	1
548	Bacteria_Firmicutes_Clostridia_Christensenellales_Christensenellaceae_NA_NA.8	1	1	1	1	1	1	1	1	1	1	1
549	Bacteria_Firmicutes_Clostridia_Christensenellales_Christensenellaceae_ChristensenellaceaeR.7group_NA.27	1	1	1	1	1	1	1	1	1	1	1
550	Bacteria_Firmicutes_Bacilli_Acholeplasmatales_Acholeplasmataceae_Acholeplasma_NA.5	1	1	1	1	1	1	1	1	1	1	1
551	Bacteria_Firmicutes_Clostridia_Oscillospirales_Ruminococcaceae_CandidatusSoleaferrea_NA.5	1	0	1	1	0	0	1	1	1	1	0
552	Bacteria_Desulfobacterota_Desulfobacteria_Desulfobacterales_NA_NA_NA.3	1	1	1	1	1	1	1	1	0	1	1
553	Bacteria_Bacteroidota_Bacteroidia_Bacteroidales_Rikenellaceae_Alistipes_NA.24	1	1	1	1	1	1	1	1	1	1	1
554	Bacteria_Synergistota_Synergistia_Synergistales_Synergistaceae_CandidatusTammella_NA.4	1	1	1	1	1	1	1	1	1	1	1
555	Bacteria_Desulfobacterota_Desulfovibrionia_Desulfovibrionales_Desulfovibrionaceae_NA_NA.3	1	1	1	1	1	1	0	1	1	1	1
556	Bacteria_Firmicutes_Clostridia_Lachnospirales_Lachnospiraceae_NA_NA.16	1	1	1	1	1	1	1	1	1	1	1
557	Bacteria_Firmicutes_Clostridia_Christensenellales_Christensenellaceae_ChristensenellaceaeR.7group_NA.28	1	1	1	1	1	1	1	1	1	1	1
558	Bacteria_Elusimicrobiota_Endomicrobia_Endomicrobiales_Endomicrobiaceae_Endomicrobium_NA.2	1	1	1	1	1	1	1	1	1	1	1
559	Bacteria_Desulfobacterota_Desulfovibrionia_Desulfovibrionales_Desulfovibrionaceae_Desulfovibrio_NA.56	1	1	1	1	1	1	1	1	1	1	1
560	Bacteria_Firmicutes_Bacilli_RF39_NA_NA_NA.3	1	1	1	1	0	1	1	1	1	1	0
561	Bacteria_Firmicutes_Clostridia_Peptococcales_Peptococcaceae_NA_NA.1	1	1	0	1	1	1	1	1	1	1	0
562	Bacteria_Firmicutes_Clostridia_ClostridiavadinBB60group_NA_NA_NA.6	1	1	1	1	1	1	1	1	1	1	1
563	Bacteria_Firmicutes_Clostridia_Christensenellales_Christensenellaceae_ChristensenellaceaeR.7group_NA.29	1	1	1	1	1	1	1	1	1	1	1
564	Bacteria_Firmicutes_Clostridia_NA_NA_NA_NA.4	1	1	1	1	1	1	1	1	1	1	1
565	Bacteria_Firmicutes_Clostridia_Lachnospirales_Lachnospiraceae_Tyzzerella_NA.8	1	1	1	1	1	1	1	1	1	1	1
566	Bacteria_Firmicutes_Clostridia_Christensenellales_Christensenellaceae_ChristensenellaceaeR.7group_NA.30	1	1	1	1	1	1	1	0	1	1	0
567	Bacteria_Proteobacteria_Gammaproteobacteria_Burkholderiales_NA_NA_NA.1	1	1	1	1	1	1	1	1	1	1	1
568	Bacteria_Firmicutes_Clostridia_Christensenellales_Christensenellaceae_ChristensenellaceaeR.7group_NA.31	0	1	0	1	1	1	1	0	0	0	1
569	Bacteria_Firmicutes_Clostridia_Oscillospirales_Ruminococcaceae_NA_NA.28	1	1	1	1	1	1	1	1	1	1	1
570	Bacteria_Bacteroidota_Bacteroidia_Bacteroidales_Rikenellaceae_Alistipes_NA.25	1	0	1	1	1	0	1	1	1	1	0
571	Bacteria_Firmicutes_Clostridia_Oscillospirales_Oscillospiraceae_NA_NA.2	1	1	1	1	1	1	1	1	1	1	0
572	Bacteria_Firmicutes_Clostridia_ClostridiaUCG.014_NA_NA_NA.2	1	0	1	1	0	0	1	0	1	1	1
573	Bacteria_Desulfobacterota_Desulfovibrionia_Desulfovibrionales_Desulfovibrionaceae_Desulfovibrio_NA.57	1	1	1	1	1	1	1	1	1	1	1
574	Bacteria_Bacteroidota_Bacteroidia_Bacteroidales_Bacteroidaceae_Bacteroides_NA.20	0	1	0	1	1	1	0	0	0	0	1
575	Bacteria_Bacteroidota_Bacteroidia_Bacteroidales_Bacteroidaceae_Bacteroides_NA.21	1	1	1	1	0	1	1	0	1	1	1
576	Bacteria_Rs.K70termitegroup_NA_NA_NA_NA_NA.2	1	1	1	1	1	1	1	1	1	1	1
577	Bacteria_Firmicutes_Clostridia_Lachnospirales_Lachnospiraceae_LachnospiraceaeNK4A136group_NA	0	1	0	1	0	0	0	0	0	0	0
578	Bacteria_Desulfobacterota_Desulfovibrionia_Desulfovibrionales_Desulfovibrionaceae_Desulfovibrio_NA.58	1	1	1	1	1	1	1	1	1	1	1
579	Bacteria_Firmicutes_Bacilli_Izemoplasmatales_NA_NA_NA	1	1	1	1	1	1	1	1	1	1	0
580	Bacteria_Desulfobacterota_Desulfovibrionia_Desulfovibrionales_Desulfovibrionaceae_Desulfovibrio_NA.59	1	1	1	1	1	1	1	1	1	1	1
581	Bacteria_Bacteroidota_Bacteroidia_Bacteroidales_Rikenellaceae_Alistipes_NA.26	1	0	1	0	0	0	0	1	1	1	1
582	Bacteria_Actinobacteriota_Coriobacteriia_Coriobacteriales_CoriobacterialesIncertaeSedis_Raoultibacter_NA.2	1	1	1	1	1	1	1	1	1	1	1
583	Bacteria_Firmicutes_Bacilli_Erysipelotrichales_Erysipelatoclostridiaceae_Erysipelatoclostridium_NA.7	1	1	1	0	0	0	0	1	1	1	0
584	Bacteria_Firmicutes_Clostridia_Lachnospirales_Lachnospiraceae_NA_NA.17	1	1	0	1	1	1	1	1	1	1	0
585	Bacteria_Firmicutes_Clostridia_Oscillospirales_Ruminococcaceae_NA_NA.30	1	0	1	0	0	0	0	1	1	1	0
586	Bacteria_Desulfobacterota_Desulfovibrionia_Desulfovibrionales_Desulfovibrionaceae_Desulfovibrio_NA.60	1	1	1	1	1	1	1	1	1	1	1
587	Bacteria_Firmicutes_Clostridia_Oscillospirales_Ruminococcaceae_IncertaeSedis_NA.3	1	1	1	1	1	1	1	1	1	1	1
588	Bacteria_Firmicutes_Clostridia_Oscillospirales_Eubacteriumcoprostanoligenesgroup_NA_NA.3	0	1	1	1	1	1	1	0	1	1	1
589	Bacteria_Bacteroidota_Bacteroidia_Bacteroidales_Dysgonomonadaceae_NA_NA.21	1	1	1	1	1	1	1	1	1	1	0
590	Bacteria_Firmicutes_Clostridia_Peptostreptococcales.Tissierellales_Anaerovoracaceae_NA_NA.6	1	1	1	1	1	1	1	1	1	1	0
591	Bacteria_Bacteroidota_Bacteroidia_Bacteroidales_Rikenellaceae_Alistipes_NA.27	1	1	1	1	1	1	1	0	1	1	1
592	Bacteria_Desulfobacterota_Desulfovibrionia_Desulfovibrionales_Desulfovibrionaceae_NA_NA.4	1	1	1	1	1	1	1	1	1	0	1
593	Bacteria_Spirochaetota_Leptospirae_Leptospirales_Leptospiraceae_Rs.H88termitegroup_NA	1	1	1	1	1	1	1	1	1	1	0
594	Bacteria_Firmicutes_Clostridia_Peptostreptococcales.Tissierellales_Anaerovoracaceae_NA_NA.7	1	1	1	1	1	1	1	1	1	1	1
595	Bacteria_Proteobacteria_Gammaproteobacteria_Burkholderiales_Oxalobacteraceae_Oxalobacter_NA.1	1	1	1	1	1	0	0	1	1	1	0
596	Bacteria_Desulfobacterota_Desulfovibrionia_Desulfovibrionales_Desulfovibrionaceae_Desulfovibrio_NA.61	1	1	1	1	1	1	1	1	1	1	1
597	Bacteria_Firmicutes_Bacilli_Lactobacillales_Enterococcaceae_Enterococcus_avium	1	1	1	1	1	0	0	1	0	1	0
598	Bacteria_Elusimicrobiota_Endomicrobia_Endomicrobiales_Endomicrobiaceae_Endomicrobium_NA.3	1	1	1	1	1	1	1	1	1	1	1
599	Bacteria_Bacteroidota_Bacteroidia_Bacteroidales_Rikenellaceae_NA_NA.3	1	1	1	1	1	1	1	1	1	1	1
600	Bacteria_Bacteroidota_Bacteroidia_Bacteroidales_Rikenellaceae_Alistipes_NA.28	1	0	1	0	0	0	1	0	1	1	0
601	Bacteria_Firmicutes_Clostridia_Oscillospirales_Ruminococcaceae_Fournierella_NA.2	1	1	1	1	1	1	0	1	1	1	1
602	Bacteria_Firmicutes_Clostridia_Oscillospirales_Ruminococcaceae_NA_NA.31	1	1	1	1	1	1	1	1	1	1	1
603	Bacteria_Firmicutes_Bacilli_Acholeplasmatales_Acholeplasmataceae_Acholeplasma_NA.6	1	1	1	1	0	1	1	1	1	1	0
604	Bacteria_Firmicutes_Negativicutes_Acidaminococcales_Acidaminococcaceae_NA_NA.5	1	1	0	1	1	1	1	1	1	1	1
605	Bacteria_Desulfobacterota_Desulfovibrionia_Desulfovibrionales_Desulfovibrionaceae_Desulfovibrio_NA.62	1	1	1	1	1	1	1	0	1	1	1
606	Bacteria_Firmicutes_Clostridia_Lachnospirales_Lachnospiraceae_NA_NA.18	1	1	1	1	1	1	1	1	1	1	1
607	Bacteria_Firmicutes_Clostridia_Peptococcales_Peptococcaceae_NA_NA.2	1	1	1	1	1	1	1	0	1	1	1
608	Bacteria_Bacteroidota_Bacteroidia_Bacteroidales_Paludibacteraceae_Paludibacter_NA.2	0	0	0	0	0	0	1	0	0	0	0
609	Bacteria_Firmicutes_Clostridia_ClostridiaUCG.014_NA_NA_NA.3	1	0	1	0	0	1	1	1	1	1	0
610	Bacteria_Firmicutes_Clostridia_Oscillospirales_Ruminococcaceae_NA_NA.32	1	1	0	1	1	1	0	1	1	1	1
611	Bacteria_Desulfobacterota_Desulfovibrionia_Desulfovibrionales_Desulfovibrionaceae_Desulfovibrio_NA.63	1	1	1	1	1	1	1	1	1	1	0
612	Bacteria_Actinobacteriota_Coriobacteriia_Coriobacteriales_CoriobacterialesIncertaeSedis_Raoultibacter_NA.3	1	0	1	1	1	0	1	1	1	1	1
613	Bacteria_Bacteroidota_Bacteroidia_Bacteroidales_Rikenellaceae_Alistipes_NA.29	1	0	1	1	1	1	1	1	1	1	0
614	Bacteria_Firmicutes_Negativicutes_Veillonellales.Selenomonadales_Sporomusaceae_Dendrosporobacter_NA	1	1	1	1	1	1	1	1	1	1	0
615	Bacteria_Planctomycetota_vadinHA49_NA_NA_NA_NA.4	1	1	1	1	1	1	1	1	1	1	1
616	Bacteria_Firmicutes_Clostridia_Christensenellales_Christensenellaceae_ChristensenellaceaeR.7group_NA.32	1	1	1	1	1	1	1	1	1	1	1
617	Bacteria_Rs.K70termitegroup_NA_NA_NA_NA_NA.3	1	1	1	1	1	0	1	1	1	0	1
618	Bacteria_Desulfobacterota_Desulfovibrionia_Desulfovibrionales_Desulfovibrionaceae_Desulfovibrio_NA.64	1	1	1	1	1	1	1	1	1	1	1
619	Bacteria_Bacteroidota_Bacteroidia_Bacteroidales_Rs.E47termitegroup_NA_NA	1	1	1	1	1	1	1	1	1	1	0
620	Bacteria_Proteobacteria_Alphaproteobacteria_Rhodospirillales_NA_NA_NA.2	1	0	1	0	0	0	0	1	1	1	0
621	Bacteria_Bacteroidota_Bacteroidia_Bacteroidales_Rikenellaceae_Alistipes_NA.30	1	0	1	1	0	1	0	1	1	1	0
622	Bacteria_Firmicutes_Clostridia_Oscillospirales_Oscillospiraceae_NK4A214group_NA.1	0	1	0	1	0	0	1	0	0	0	0
623	Bacteria_Firmicutes_Clostridia_Oscillospirales_Ruminococcaceae_NA_NA.33	0	0	1	0	1	0	0	1	1	1	1
624	Bacteria_Firmicutes_Clostridia_Peptostreptococcales.Tissierellales_Anaerovoracaceae_NA_NA.8	1	1	1	1	1	1	1	1	1	1	1
625	Bacteria_Bacteroidota_Bacteroidia_Bacteroidales_Rikenellaceae_Alistipes_NA.31	1	1	1	1	1	1	1	1	1	1	0
626	Bacteria_Firmicutes_Bacilli_RF39_NA_NA_NA.4	1	1	1	1	1	1	1	1	1	1	1
627	Bacteria_Bacteroidota_Bacteroidia_Bacteroidales_Marinilabiliaceae_NA_NA.1	1	1	1	1	1	1	1	1	1	1	0
628	Bacteria_Proteobacteria_Alphaproteobacteria_Rhodospirillales_NA_NA_NA.3	1	1	1	1	1	1	0	1	1	1	0
629	Bacteria_Desulfobacterota_Desulfovibrionia_Desulfovibrionales_Desulfovibrionaceae_Desulfovibrio_NA.65	1	1	1	1	1	1	1	1	1	1	1
630	Bacteria_Bacteroidota_Bacteroidia_Bacteroidales_Rikenellaceae_Alistipes_NA.32	1	0	1	1	0	0	0	1	1	1	0
631	Bacteria_Planctomycetota_vadinHA49_NA_NA_NA_NA.5	1	1	1	1	1	1	1	1	1	1	1
632	Bacteria_Actinobacteriota_Coriobacteriia_Coriobacteriales_CoriobacterialesIncertaeSedis_NA_NA	1	1	1	1	1	1	1	1	1	1	1
633	Bacteria_Desulfobacterota_Desulfovibrionia_Desulfovibrionales_Desulfovibrionaceae_Desulfovibrio_NA.66	1	1	1	1	0	1	1	1	1	1	1
634	Bacteria_Firmicutes_Clostridia_Oscillospirales_Ruminococcaceae_IncertaeSedis_NA.4	1	0	1	1	1	0	0	1	1	1	1
635	Bacteria_Desulfobacterota_Desulfovibrionia_Desulfovibrionales_Desulfovibrionaceae_Desulfovibrio_NA.67	0	1	0	1	1	0	0	0	0	0	1
636	Bacteria_Verrucomicrobiota_Verrucomicrobiae_Opitutales_Opitutaceae_Ereboglobus_NA	1	1	1	1	0	1	1	1	1	1	1
637	Bacteria_Firmicutes_Clostridia_NA_NA_NA_NA.5	1	1	1	0	1	0	1	1	1	1	0
638	Bacteria_Firmicutes_Clostridia_NA_NA_NA_NA.6	1	1	1	1	1	1	1	1	1	1	1
639	Bacteria_Firmicutes_Clostridia_Oscillospirales_Ruminococcaceae_NA_NA.34	1	1	1	1	1	1	1	1	1	1	0
640	Bacteria_Firmicutes_Syntrophomonadia_Syntrophomonadales_Syntrophomonadaceae_Pelospora_NA	1	1	1	1	1	1	1	1	1	1	0
641	Bacteria_Actinobacteriota_Coriobacteriia_Coriobacteriales_CoriobacterialesIncertaeSedis_NA_NA.1	1	1	1	1	1	1	1	1	1	1	1
642	Bacteria_Firmicutes_Clostridia_Oscillospirales_Oscillospiraceae_Colidextribacter_NA.3	1	0	1	1	1	0	0	1	1	1	0
643	Bacteria_Firmicutes_Clostridia_NA_NA_NA_NA.7	1	1	1	1	0	1	1	1	1	1	0
644	Bacteria_Firmicutes_Clostridia_Christensenellales_Christensenellaceae_NA_NA.9	1	1	1	1	1	1	1	1	1	1	1
645	Bacteria_Firmicutes_Clostridia_Lachnospirales_Lachnospiraceae_Robinsoniella_NA.3	1	1	1	0	1	1	1	1	1	1	1
646	Bacteria_Firmicutes_Clostridia_Oscillospirales_Ruminococcaceae_NA_NA.35	1	1	1	1	1	1	1	1	1	1	1
647	Bacteria_Verrucomicrobiota_Kiritimatiellae_WCHB1.41_NA_NA_NA.1	1	1	1	1	1	1	1	1	1	1	0
648	Bacteria_Firmicutes_Clostridia_Gracilibacteraceae_NA_NA_NA	1	1	1	1	1	1	1	1	1	1	1
649	Bacteria_Firmicutes_Clostridia_Lachnospirales_Lachnospiraceae_NA_NA.19	1	0	0	0	0	0	1	1	1	1	0
650	Bacteria_Firmicutes_Clostridia_Christensenellales_Christensenellaceae_ChristensenellaceaeR.7group_NA.33	1	1	1	1	1	1	1	1	1	1	1
651	Bacteria_Firmicutes_Bacilli_Acholeplasmatales_Acholeplasmataceae_Acholeplasma_NA.7	1	1	1	1	0	1	1	1	1	1	0
652	Bacteria_Planctomycetota_vadinHA49_NA_NA_NA_NA.6	1	1	1	1	1	1	1	1	1	0	1
653	Bacteria_Firmicutes_Clostridia_Lachnospirales_Lachnospiraceae_NA_NA.20	1	0	1	0	0	0	0	1	1	1	0
654	Bacteria_Desulfobacterota_Desulfovibrionia_Desulfovibrionales_Desulfovibrionaceae_Desulfovibrio_NA.68	1	1	1	1	1	1	1	1	1	1	1
655	Bacteria_Firmicutes_Clostridia_Eubacteriales_Anaerofustaceae_Anaerofustis_NA	1	1	1	1	1	1	1	1	1	1	1
656	Bacteria_Firmicutes_Clostridia_ClostridiaUCG.014_NA_NA_NA.4	1	1	1	1	1	1	1	1	1	1	1
657	Bacteria_Firmicutes_Clostridia_Peptostreptococcales.Tissierellales_Anaerovoracaceae_NA_NA.9	1	0	1	1	1	0	0	1	1	1	0
658	Bacteria_Firmicutes_Clostridia_Christensenellales_Christensenellaceae_NA_NA.10	1	1	1	1	1	1	1	1	0	1	1
659	Bacteria_Bacteroidota_Bacteroidia_Bacteroidales_Rikenellaceae_Alistipes_NA.33	1	1	1	1	1	1	1	1	0	1	1
660	Bacteria_Bdellovibrionota_Bdellovibrionia_Bacteriovoracales_Bacteriovoracaceae_Peredibacter_NA	1	1	1	0	0	1	1	1	1	1	1
661	Bacteria_Firmicutes_Clostridia_Lachnospirales_Lachnospiraceae_Tyzzerella_NA.9	1	1	0	1	1	1	1	1	1	1	0
662	Bacteria_Firmicutes_Bacilli_RF39_NA_NA_NA.5	0	1	0	1	1	1	1	0	0	0	1
663	Bacteria_Bacteroidota_Bacteroidia_Bacteroidales_Rs.E47termitegroup_NA_NA.1	1	1	1	1	1	0	1	1	1	1	0
664	Bacteria_Bacteroidota_Bacteroidia_Bacteroidales_Rikenellaceae_Alistipes_NA.34	1	0	1	0	0	0	0	1	1	1	0
665	Bacteria_Firmicutes_Clostridia_Oscillospirales_Ruminococcaceae_NA_NA.36	1	1	1	1	0	1	1	1	1	1	1
666	Bacteria_Firmicutes_Clostridia_Oscillospirales_Butyricicoccaceae_UCG.009_NA.5	1	1	1	1	1	1	1	1	1	1	1
667	Bacteria_Firmicutes_Clostridia_Christensenellales_Christensenellaceae_ChristensenellaceaeR.7group_NA.34	1	1	1	1	1	1	1	1	1	1	1
668	Bacteria_Firmicutes_Clostridia_Christensenellales_Christensenellaceae_ChristensenellaceaeR.7group_NA.35	1	0	0	0	0	0	1	1	1	1	0
669	Bacteria_Firmicutes_Clostridia_Christensenellales_Christensenellaceae_ChristensenellaceaeR.7group_NA.36	0	1	1	1	1	1	1	0	0	0	1
670	Bacteria_NA_NA_NA_NA_NA_NA.1	1	0	1	0	0	0	0	1	1	1	0
671	Bacteria_Firmicutes_Clostridia_Peptococcales_Peptococcaceae_NA_NA.3	1	1	1	1	1	1	1	1	1	1	0
672	Bacteria_Firmicutes_Bacilli_RF39_NA_NA_NA.6	1	1	1	1	1	1	1	1	1	1	0
673	Bacteria_Proteobacteria_Alphaproteobacteria_Rhodospirillales_NA_NA_NA.4	1	1	1	1	1	1	0	1	1	1	0
674	Bacteria_Firmicutes_Clostridia_Peptococcales_Peptococcaceae_NA_NA.4	1	1	1	1	1	1	1	1	1	1	0
675	Bacteria_Desulfobacterota_Desulfovibrionia_Desulfovibrionales_Desulfovibrionaceae_Desulfovibrio_NA.69	1	1	1	1	1	1	1	1	1	1	1
676	Bacteria_Desulfobacterota_Desulfovibrionia_Desulfovibrionales_Desulfovibrionaceae_Desulfovibrio_NA.70	1	1	0	1	1	1	1	1	1	0	0
677	Bacteria_Planctomycetota_Planctomycetes_Pirellulales_Pirellulaceae_Termiteplanctomycetecluster_NA.1	1	1	0	1	1	1	1	1	1	1	1
678	Bacteria_Desulfobacterota_Desulfovibrionia_Desulfovibrionales_Desulfovibrionaceae_Desulfovibrio_NA.71	1	1	1	1	1	1	1	1	1	1	1
679	Bacteria_Bacteroidota_Bacteroidia_Bacteroidales_Dysgonomonadaceae_Dysgonomonas_NA.20	1	1	1	1	1	1	1	1	1	1	1
680	Bacteria_Firmicutes_Clostridia_Oscillospirales_Oscillospiraceae_Intestinimonas_NA.4	1	0	1	1	0	0	0	1	1	1	0
681	Bacteria_Desulfobacterota_Desulfovibrionia_Desulfovibrionales_Desulfovibrionaceae_Desulfovibrio_NA.72	0	0	0	1	1	0	1	0	0	0	0
682	Archaea_Thermoplasmatota_Thermoplasmata_Methanomassiliicoccales_Methanomethylophilaceae_NA_NA.1	1	0	1	1	0	0	1	1	1	1	0
683	Bacteria_Bacteroidota_Bacteroidia_Bacteroidales_Dysgonomonadaceae_Dysgonomonas_NA.21	0	1	0	1	0	1	1	0	0	0	1
684	Bacteria_Desulfobacterota_Desulfovibrionia_Desulfovibrionales_Desulfovibrionaceae_NA_NA.5	1	1	1	1	0	1	1	1	1	1	1
685	Bacteria_Firmicutes_Clostridia_Eubacteriales_Anaerofustaceae_Anaerofustis_NA.1	1	1	1	0	1	1	1	1	1	1	1
686	Bacteria_Bacteroidota_Bacteroidia_Bacteroidales_Rikenellaceae_Alistipes_NA.35	0	1	0	1	1	1	1	0	0	0	1
687	Bacteria_Firmicutes_Clostridia_Oscillospirales_Ruminococcaceae_IncertaeSedis_NA.5	1	1	0	1	1	1	1	1	0	0	1
688	Bacteria_Actinobacteriota_Coriobacteriia_Coriobacteriales_CoriobacterialesIncertaeSedis_NA_NA.2	1	1	1	1	1	1	1	1	1	1	0
689	Bacteria_Firmicutes_Clostridia_Christensenellales_Christensenellaceae_ChristensenellaceaeR.7group_NA.37	1	1	1	1	1	1	1	1	1	1	1
690	Bacteria_Desulfobacterota_Desulfovibrionia_Desulfovibrionales_Desulfovibrionaceae_Desulfovibrio_NA.73	0	1	0	1	1	1	1	0	1	0	1
691	Bacteria_Patescibacteria_Gracilibacteria_JGI0000069.P22_NA_NA_NA	1	1	1	1	0	1	0	1	1	1	0
692	Bacteria_Firmicutes_Clostridia_Christensenellales_Christensenellaceae_ChristensenellaceaeR.7group_NA.38	1	1	1	0	1	1	1	1	1	1	1
693	Bacteria_Proteobacteria_Alphaproteobacteria_Rhodospirillales_NA_NA_NA.5	1	1	1	1	0	0	1	1	1	1	0
694	Bacteria_Firmicutes_Bacilli_RF39_NA_NA_NA.7	1	1	1	1	1	1	1	1	1	1	1
695	Bacteria_Firmicutes_Clostridia_Oscillospirales_Ruminococcaceae_CandidatusSoleaferrea_NA.6	1	1	1	1	1	1	1	1	1	1	1
696	Bacteria_Bacteroidota_Bacteroidia_Bacteroidales_Tannerellaceae_Parabacteroides_NA.24	0	0	0	1	0	0	1	0	0	0	0
697	Bacteria_Firmicutes_Bacilli_Erysipelotrichales_Erysipelatoclostridiaceae_UCG.004_NA.2	1	1	1	1	1	1	1	1	1	1	0
698	Bacteria_Firmicutes_Clostridia_Peptostreptococcales.Tissierellales_Anaerovoracaceae_NA_NA.10	1	1	1	1	1	1	1	1	1	1	1
699	Bacteria_Spirochaetota_Brachyspirae_Brachyspirales_Brachyspiraceae_Brachyspira_NA	1	1	1	1	1	1	1	1	1	1	1
700	Bacteria_Firmicutes_Bacilli_Staphylococcales_Staphylococcaceae_Staphylococcus_NA	1	0	0	0	0	1	0	1	1	1	1
701	Bacteria_Proteobacteria_Alphaproteobacteria_Rhodospirillales_NA_NA_NA.6	1	1	1	1	1	1	0	1	1	1	0
702	Bacteria_Deferribacterota_Deferribacteres_Deferribacterales_Deferribacteraceae_Mucispirillum_NA.1	1	1	1	1	1	1	1	1	1	1	1
703	Bacteria_Firmicutes_Clostridia_Christensenellales_Christensenellaceae_NA_NA.11	1	1	1	1	1	1	1	1	1	1	1
704	Bacteria_Firmicutes_Clostridia_Christensenellales_Christensenellaceae_ChristensenellaceaeR.7group_NA.39	1	1	1	1	0	1	1	1	1	1	1
705	Bacteria_Firmicutes_Clostridia_Oscillospirales_Oscillospiraceae_NK4A214group_NA.2	1	1	1	1	1	1	1	1	1	1	0
706	Bacteria_Bacteroidota_Bacteroidia_Bacteroidales_Tannerellaceae_Parabacteroides_NA.25	1	1	1	1	1	0	1	1	1	1	1
707	Bacteria_Firmicutes_Clostridia_Oscillospirales_Ruminococcaceae_NA_NA.37	1	1	1	1	1	0	1	1	1	1	1
708	Bacteria_Desulfobacterota_Desulfovibrionia_Desulfovibrionales_Desulfovibrionaceae_Desulfovibrio_NA.74	1	1	1	1	1	1	1	1	0	1	1
709	Bacteria_Firmicutes_Clostridia_Oscillospirales_Eubacteriumcoprostanoligenesgroup_NA_NA.4	0	1	1	0	1	1	1	1	0	1	1
710	Bacteria_Desulfobacterota_Desulfovibrionia_Desulfovibrionales_Desulfovibrionaceae_Desulfovibrio_NA.75	0	1	0	1	1	1	1	0	0	0	1
711	Bacteria_Firmicutes_Clostridia_Oscillospirales_Ruminococcaceae_IncertaeSedis_NA.6	0	1	1	1	1	1	1	0	1	1	1
712	Bacteria_Desulfobacterota_Desulfovibrionia_Desulfovibrionales_Desulfovibrionaceae_Desulfovibrio_NA.76	1	1	1	1	0	0	1	1	1	1	1
713	Bacteria_Proteobacteria_Alphaproteobacteria_Rhodospirillales_NA_NA_NA.7	1	1	1	1	1	0	0	1	1	1	0
714	Bacteria_Firmicutes_Clostridia_Christensenellales_Christensenellaceae_ChristensenellaceaeR.7group_NA.40	1	1	1	1	1	0	1	1	1	1	1
715	Bacteria_Elusimicrobiota_Elusimicrobia_Elusimicrobiales_Elusimicrobiaceae_Elusimicrobium_NA.2	1	1	1	1	1	1	1	1	1	1	0
716	Bacteria_Actinobacteriota_Coriobacteriia_Coriobacteriales_CoriobacterialesIncertaeSedis_Raoultibacter_NA.4	1	1	1	1	1	1	0	1	1	1	1
717	Bacteria_Firmicutes_Clostridia_Oscillospirales_Ruminococcaceae_NA_NA.38	1	0	1	1	1	0	0	1	1	1	1
718	Bacteria_Proteobacteria_Alphaproteobacteria_Rhodospirillales_NA_NA_NA.8	1	1	1	1	0	1	0	1	1	1	1
719	Bacteria_Rs.K70termitegroup_NA_NA_NA_NA_NA.4	1	1	0	1	1	1	1	1	1	1	1
720	Bacteria_Firmicutes_Clostridia_Oscillospirales_Eubacteriumcoprostanoligenesgroup_NA_NA.5	1	1	1	1	1	1	1	0	1	0	1
721	Bacteria_Firmicutes_Clostridia_ClostridiavadinBB60group_NA_NA_NA.7	1	1	1	1	1	1	1	1	1	1	1
722	Bacteria_Bacteroidota_Bacteroidia_Bacteroidales_Tannerellaceae_Parabacteroides_NA.26	1	0	0	0	0	0	0	0	0	0	0
723	Bacteria_Bacteroidota_Bacteroidia_Bacteroidales_Bacteroidaceae_Bacteroides_NA.25	0	1	1	1	1	1	0	1	0	1	1
724	Bacteria_Firmicutes_Bacilli_Erysipelotrichales_Erysipelotrichaceae_Breznakia_NA.3	1	1	1	1	1	1	1	1	1	1	1
725	Bacteria_Firmicutes_Bacilli_Erysipelotrichales_Erysipelotrichaceae_Anaerorhabdusfurcosagroup_NA.2	1	1	1	1	1	1	1	1	1	1	1
726	Bacteria_Bacteroidota_Bacteroidia_Bacteroidales_Rikenellaceae_Alistipes_NA.36	1	1	1	1	1	1	1	1	1	1	1
727	Bacteria_Bacteroidota_Bacteroidia_Bacteroidales_Marinifilaceae_Sanguibacteroides_NA.3	1	0	1	0	1	0	0	1	1	1	0
728	Bacteria_Firmicutes_Clostridia_Christensenellales_Christensenellaceae_ChristensenellaceaeR.7group_NA.41	1	0	1	1	0	1	0	1	1	1	0
729	Bacteria_Firmicutes_Clostridia_NA_NA_NA_NA.8	1	1	1	1	1	1	1	1	1	1	1
730	Bacteria_Firmicutes_Clostridia_Oscillospirales_Ruminococcaceae_NA_NA.39	0	1	0	1	0	1	1	0	0	0	0
731	Bacteria_Bacteroidota_Bacteroidia_Bacteroidales_Marinilabiliaceae_NA_NA.2	1	1	1	1	1	1	1	1	1	1	1
732	Bacteria_Bacteroidota_Bacteroidia_Bacteroidales_Rikenellaceae_Rikenella_NA.1	1	1	1	1	1	1	0	1	1	1	0
733	Bacteria_Firmicutes_Clostridia_ClostridiaUCG.014_NA_NA_NA.5	1	1	1	1	1	1	1	1	1	1	1
734	Bacteria_Firmicutes_Clostridia_Lachnospirales_Lachnospiraceae_Tyzzerella_NA.11	1	1	0	0	1	0	0	1	1	0	0
735	Bacteria_Firmicutes_Clostridia_ClostridiavadinBB60group_NA_NA_NA.8	1	1	1	1	1	1	1	1	1	1	1
736	Bacteria_Firmicutes_Bacilli_Lactobacillales_Enterococcaceae_Enterococcus_NA.2	1	0	0	0	0	0	0	1	0	1	0
737	Bacteria_Firmicutes_Clostridia_Christensenellales_Christensenellaceae_ChristensenellaceaeR.7group_NA.42	1	1	1	1	1	1	1	0	1	1	1
738	Bacteria_Firmicutes_Clostridia_Christensenellales_Christensenellaceae_ChristensenellaceaeR.7group_NA.43	1	1	1	1	1	1	1	1	1	1	1
739	Bacteria_Firmicutes_Clostridia_Lachnospirales_Lachnospiraceae_IncertaeSedis_NA.7	1	0	1	1	1	0	1	1	1	1	0
740	Bacteria_Bacteroidota_Bacteroidia_Bacteroidales_Tannerellaceae_NA_NA.8	1	1	1	1	1	1	1	1	1	1	0
741	Bacteria_Firmicutes_Clostridia_Peptococcales_Peptococcaceae_NA_NA.5	0	1	0	1	1	1	1	0	0	0	0
742	Bacteria_Spirochaetota_Spirochaetia_Spirochaetales_Spirochaetaceae_Sediminispirochaeta_NA.4	1	1	1	1	1	1	1	1	1	0	1
743	Bacteria_Firmicutes_Bacilli_Mycoplasmatales_Mycoplasmataceae_Mycoplasma_NA	1	1	1	1	1	1	0	1	1	1	0
744	Bacteria_Desulfobacterota_Desulfovibrionia_Desulfovibrionales_Desulfovibrionaceae_Desulfovibrio_NA.77	1	1	1	1	0	1	1	1	1	1	1
745	Bacteria_Firmicutes_Clostridia_Christensenellales_Christensenellaceae_ChristensenellaceaeR.7group_NA.44	1	0	1	1	1	0	1	1	1	1	0
746	Bacteria_Firmicutes_Clostridia_Christensenellales_Christensenellaceae_ChristensenellaceaeR.7group_NA.45	1	1	1	1	1	1	1	1	1	1	1
747	Bacteria_Firmicutes_Clostridia_Lachnospirales_Lachnospiraceae_Tyzzerella_NA.12	1	1	1	1	1	1	1	1	1	1	1
748	Bacteria_Firmicutes_Clostridia_Oscillospirales_Ruminococcaceae_NA_NA.40	1	1	1	1	1	1	1	1	1	1	1
749	Bacteria_Planctomycetota_Planctomycetes_Pirellulales_Pirellulaceae_CPla.4termitegroup_NA	1	1	1	1	1	1	1	0	1	1	1
750	Archaea_Euryarchaeota_Methanobacteria_Methanobacteriales_Methanobacteriaceae_Methanobrevibacter_NA.4	1	0	1	0	0	0	0	1	1	1	0
751	Bacteria_Desulfobacterota_Desulfovibrionia_Desulfovibrionales_Desulfovibrionaceae_Desulfovibrio_NA.78	1	1	1	1	1	1	1	1	1	0	1
752	Bacteria_Firmicutes_Clostridia_Oscillospirales_Ruminococcaceae_CandidatusSoleaferrea_NA.7	1	0	1	1	1	0	1	1	1	1	0
753	Bacteria_Firmicutes_Clostridia_Peptococcales_Peptococcaceae_NA_NA.6	1	1	1	1	1	1	1	1	1	1	0
754	Bacteria_Bacteroidota_Bacteroidia_Bacteroidales_Williamwhitmaniaceae_BCf9.17termitegroup_NA	1	1	1	1	0	1	0	1	1	1	0
755	Bacteria_Firmicutes_Clostridia_Peptococcales_Peptococcaceae_NA_NA.7	1	1	1	1	1	1	1	1	1	1	0
756	Bacteria_Bacteroidota_Bacteroidia_Bacteroidales_Rikenellaceae_NA_NA.4	0	0	0	0	0	0	1	0	0	0	0
757	Bacteria_Firmicutes_Clostridia_Christensenellales_Christensenellaceae_ChristensenellaceaeR.7group_NA.46	1	0	1	1	1	1	1	1	1	1	1
758	Bacteria_Bacteroidota_Bacteroidia_Bacteroidales_Paludibacteraceae_Paludibacter_NA.3	1	0	1	0	0	1	0	1	1	1	0
759	Bacteria_Firmicutes_Negativicutes_Acidaminococcales_Acidaminococcaceae_Phascolarctobacterium_faecium	0	1	0	1	1	1	1	0	0	0	1
760	Bacteria_Planctomycetota_Planctomycetes_Pirellulales_Pirellulaceae_Termiteplanctomycetecluster_NA.2	1	0	1	1	1	0	1	0	1	1	0
761	Bacteria_Firmicutes_Clostridia_Christensenellales_Christensenellaceae_ChristensenellaceaeR.7group_NA.47	1	1	1	1	1	1	1	0	1	1	1
762	Bacteria_Desulfobacterota_Desulfovibrionia_Desulfovibrionales_Desulfovibrionaceae_Desulfovibrio_NA.79	1	1	1	1	1	1	1	1	1	1	1
763	Archaea_Halobacterota_Methanomicrobia_Methanomicrobiales_Methanospirillaceae_Methanospirillum_NA	1	1	1	1	1	1	0	1	1	1	1
764	Bacteria_Firmicutes_Bacilli_Erysipelotrichales_Erysipelotrichaceae_Erysipelothrix_NA	1	1	1	1	1	1	1	1	1	1	0
765	Bacteria_Firmicutes_Clostridia_Oscillospirales_Eubacteriumcoprostanoligenesgroup_NA_NA.6	1	1	1	1	1	1	1	1	1	0	0
766	Bacteria_Firmicutes_Clostridia_Oscillospirales_UCG.010_NA_NA.3	1	1	1	1	1	1	1	1	1	1	0
767	Bacteria_Proteobacteria_Alphaproteobacteria_NA_NA_NA_NA	1	1	1	1	1	0	0	1	1	1	0
768	Bacteria_Firmicutes_Clostridia_Oscillospirales_Ruminococcaceae_NA_NA.41	1	1	1	1	1	0	1	1	1	1	1
769	Bacteria_Planctomycetota_Planctomycetes_Pirellulales_Pirellulaceae_Termiteplanctomycetecluster_NA.3	1	1	1	1	1	1	1	1	1	0	0
770	Bacteria_Elusimicrobiota_Elusimicrobia_Elusimicrobiales_Elusimicrobiaceae_Elusimicrobium_NA.3	1	1	1	1	1	1	1	1	1	1	0
771	Bacteria_Firmicutes_Clostridia_Christensenellales_Christensenellaceae_ChristensenellaceaeR.7group_NA.48	1	1	1	1	1	1	1	1	1	1	1
772	Bacteria_Firmicutes_Clostridia_Oscillospirales_Ruminococcaceae_NA_NA.42	1	1	1	1	1	1	1	1	1	1	1
773	Bacteria_Firmicutes_Clostridia_Oscillospirales_Oscillospiraceae_NA_NA.3	0	1	1	1	1	1	1	1	1	0	0
774	Bacteria_Bacteroidota_Bacteroidia_Bacteroidales_Dysgonomonadaceae_Dysgonomonas_NA.22	1	1	1	1	1	1	1	1	1	1	0
775	Bacteria_Firmicutes_Clostridia_Peptococcales_Peptococcaceae_NA_NA.8	1	1	1	1	1	1	1	1	1	1	1
776	Bacteria_Desulfobacterota_Desulfovibrionia_Desulfovibrionales_Desulfovibrionaceae_Desulfovibrio_NA.80	1	1	0	1	1	1	1	1	1	1	1
777	Bacteria_Patescibacteria_Gracilibacteria_JGI0000069.P22_NA_NA_NA.1	1	1	1	1	0	0	1	1	1	1	0
778	Bacteria_Firmicutes_Clostridia_Christensenellales_Christensenellaceae_ChristensenellaceaeR.7group_NA.49	1	1	0	1	0	1	1	0	1	0	0
779	Bacteria_Planctomycetota_vadinHA49_NA_NA_NA_NA.7	1	1	0	1	1	1	1	0	0	0	1
780	Bacteria_Firmicutes_Clostridia_Oscillospirales_Butyricicoccaceae_UCG.009_NA.6	1	1	0	1	1	1	1	1	1	1	1
781	Bacteria_Desulfobacterota_Desulfovibrionia_Desulfovibrionales_Desulfovibrionaceae_NA_NA.6	1	1	1	0	0	0	1	1	1	1	0
782	Bacteria_Firmicutes_Clostridia_Oscillospirales_Ruminococcaceae_NA_NA.43	1	1	1	1	1	1	1	1	1	1	0
783	Bacteria_Firmicutes_Clostridia_Christensenellales_Christensenellaceae_ChristensenellaceaeR.7group_NA.50	1	1	1	1	1	1	1	0	1	0	1
784	Bacteria_Firmicutes_Clostridia_Lachnospirales_Lachnospiraceae_Tyzzerella_NA.13	1	1	0	1	1	0	0	1	0	0	0
785	Bacteria_Firmicutes_Clostridia_Oscillospirales_Ruminococcaceae_CandidatusSoleaferrea_NA.8	0	1	1	1	1	1	1	1	0	0	1
786	Bacteria_Firmicutes_Clostridia_Peptococcales_Peptococcaceae_NA_NA.9	1	1	1	1	1	1	1	1	1	1	1
787	Bacteria_Firmicutes_NA_NA_NA_NA_NA.4	1	1	1	1	1	1	1	1	1	1	1
788	Bacteria_Firmicutes_Clostridia_Oscillospirales_Oscillospiraceae_NA_NA.4	1	1	1	1	1	1	1	1	1	1	0
789	Bacteria_Bacteroidota_Bacteroidia_Bacteroidales_Paludibacteraceae_NA_NA.5	1	0	1	1	1	1	1	1	1	1	0
790	Bacteria_Desulfobacterota_Desulfovibrionia_Desulfovibrionales_Desulfovibrionaceae_Desulfovibrio_NA.81	0	1	0	0	0	0	1	1	1	1	0
791	Bacteria_Firmicutes_Clostridia_Oscillospirales_Oscillospiraceae_NA_NA.5	1	1	1	1	1	1	1	1	1	1	1
792	Bacteria_Firmicutes_Syntrophomonadia_Syntrophomonadales_Syntrophomonadaceae_NA_NA	1	1	1	1	1	1	1	1	1	1	0
793	Bacteria_Firmicutes_Bacilli_Erysipelotrichales_Erysipelatoclostridiaceae_UCG.004_NA.3	1	1	1	1	0	1	1	0	1	1	1
794	Bacteria_Bacteroidota_Bacteroidia_Bacteroidales_NA_NA_NA.6	1	1	1	0	0	1	0	1	1	1	1
795	Bacteria_Firmicutes_Clostridia_Oscillospirales_Ruminococcaceae_CandidatusSoleaferrea_NA.9	1	1	1	1	1	1	1	1	1	1	0
796	Bacteria_Bacteroidota_Bacteroidia_Flavobacteriales_Weeksellaceae_Elizabethkingia_NA	1	0	1	0	0	0	0	1	1	0	0
797	Bacteria_Firmicutes_Clostridia_Christensenellales_Christensenellaceae_ChristensenellaceaeR.7group_NA.51	0	1	0	1	1	1	1	0	0	0	1
798	Bacteria_Firmicutes_Clostridia_NA_NA_NA_NA.9	1	1	1	1	1	1	1	0	1	1	1
799	Bacteria_Firmicutes_Clostridia_Lachnospirales_Lachnospiraceae_Tyzzerella_NA.14	1	1	0	1	1	1	1	0	1	0	1
800	Bacteria_Firmicutes_Clostridia_Oscillospirales_Ruminococcaceae_Anaerotruncus_NA.1	1	1	1	1	1	1	1	1	1	1	1
801	Bacteria_Proteobacteria_Alphaproteobacteria_Rhodospirillales_NA_NA_NA.9	1	1	1	1	1	1	1	1	1	1	1
802	Bacteria_Firmicutes_Clostridia_Oscillospirales_UCG.010_NA_NA.4	1	1	1	1	1	1	1	1	1	1	0
803	Bacteria_Firmicutes_Clostridia_Oscillospirales_NA_NA_NA.1	1	1	1	1	1	1	1	1	1	1	1
804	Bacteria_Firmicutes_Clostridia_Lachnospirales_Lachnospiraceae_Tyzzerella_NA.15	1	1	1	1	1	0	1	1	1	1	0
805	Bacteria_Actinobacteriota_Coriobacteriia_Coriobacteriales_CoriobacterialesIncertaeSedis_Raoultibacter_NA.5	1	0	1	0	1	0	0	1	0	1	1
806	Bacteria_Bacteroidota_Bacteroidia_Bacteroidales_CR.115_NA_NA.1	1	0	1	1	1	1	1	1	1	1	0
807	Bacteria_Desulfobacterota_Desulfarculia_Desulfarculales_NA_NA_NA	1	1	1	1	1	1	1	1	1	1	1
808	Bacteria_Desulfobacterota_Desulfovibrionia_Desulfovibrionales_Desulfovibrionaceae_Desulfovibrio_NA.83	1	1	0	1	1	1	1	1	0	1	1
809	Bacteria_Desulfobacterota_Desulfovibrionia_Desulfovibrionales_Desulfovibrionaceae_Desulfovibrio_NA.84	1	0	1	1	0	0	1	1	1	1	1
810	Bacteria_Desulfobacterota_Desulfovibrionia_Desulfovibrionales_Desulfovibrionaceae_Desulfovibrio_NA.85	1	1	1	1	0	1	1	1	1	1	1
811	Bacteria_Firmicutes_Clostridia_Oscillospirales_Ruminococcaceae_NA_NA.44	1	0	1	1	1	0	0	1	1	1	1
812	Bacteria_Deferribacterota_Deferribacteres_Deferribacterales_Deferribacteraceae_Mucispirillum_NA.2	1	1	1	1	1	1	1	1	0	1	1
813	Bacteria_Firmicutes_Clostridia_Christensenellales_Christensenellaceae_ChristensenellaceaeR.7group_NA.52	1	1	1	1	1	1	1	1	1	1	1
814	Bacteria_Firmicutes_Clostridia_Lachnospirales_Lachnospiraceae_Lachnoclostridium_NA.5	0	0	0	0	0	0	1	0	1	1	0
815	Bacteria_Firmicutes_Clostridia_Oscillospirales_Ruminococcaceae_CandidatusSoleaferrea_NA.10	1	1	1	1	1	1	1	1	1	1	0
816	Bacteria_Desulfobacterota_Desulfovibrionia_Desulfovibrionales_Desulfovibrionaceae_Desulfovibrio_NA.86	1	1	1	1	1	1	1	1	0	0	1
817	Bacteria_Firmicutes_Clostridia_Oscillospirales_Hydrogenoanaerobacterium_NA_NA.2	0	1	0	1	1	1	1	0	0	0	1
818	Bacteria_Firmicutes_Clostridia_Lachnospirales_Lachnospiraceae_Tyzzerella_NA.16	1	1	0	1	1	1	1	1	1	0	0
819	Bacteria_Desulfobacterota_Desulfovibrionia_Desulfovibrionales_Desulfovibrionaceae_Desulfovibrio_NA.87	1	1	1	1	0	1	0	1	1	1	1
820	Bacteria_Firmicutes_Clostridia_Oscillospirales_Ruminococcaceae_NA_NA.45	1	1	1	1	1	1	1	1	1	1	1
821	Bacteria_Bacteroidota_Bacteroidia_Bacteroidales_Dysgonomonadaceae_Dysgonomonas_NA.23	0	1	0	1	1	1	1	0	0	0	1
822	Bacteria_Firmicutes_Clostridia_Oscillospirales_Oscillospiraceae_Colidextribacter_NA.4	1	0	1	1	1	1	1	1	1	1	1
823	Bacteria_Verrucomicrobiota_Lentisphaeria_Victivallales_vadinBE97_NA_NA	1	1	1	1	1	1	1	1	1	1	0
824	Bacteria_Verrucomicrobiota_Verrucomicrobiae_Opitutales_Opitutaceae_Ereboglobus_NA.1	1	1	1	0	1	1	1	1	1	1	0
825	Bacteria_Firmicutes_Clostridia_Christensenellales_Christensenellaceae_ChristensenellaceaeR.7group_NA.53	1	1	1	1	1	1	1	1	1	1	0
826	Bacteria_Desulfobacterota_Desulfovibrionia_Desulfovibrionales_Desulfovibrionaceae_NA_NA.7	1	1	1	1	1	1	1	1	1	1	1
827	Bacteria_Firmicutes_Clostridia_Oscillospirales_Ruminococcaceae_NA_NA.46	0	1	1	1	1	1	1	1	0	1	1
828	Bacteria_Firmicutes_Clostridia_NA_NA_NA_NA.10	1	1	1	1	1	1	1	1	1	1	1
829	Bacteria_Desulfobacterota_Desulfovibrionia_Desulfovibrionales_Desulfovibrionaceae_Desulfovibrio_NA.88	1	1	1	1	1	1	1	1	1	1	1
830	Bacteria_Firmicutes_Bacilli_RsaHf231_NA_NA_NA.2	1	1	1	1	1	1	0	1	1	1	1
831	Bacteria_Desulfobacterota_Desulfovibrionia_Desulfovibrionales_Desulfovibrionaceae_NA_NA.8	1	1	1	1	1	1	1	1	1	1	0
832	Bacteria_Planctomycetota_Planctomycetes_Pirellulales_Pirellulaceae_Termiteplanctomycetecluster_NA.4	1	1	1	1	1	1	1	1	1	0	1
833	Bacteria_Spirochaetota_Spirochaetia_Spirochaetales_Spirochaetaceae_Treponema_NA.3	1	1	0	0	1	1	1	1	1	1	1
834	Bacteria_Firmicutes_Clostridia_Christensenellales_Christensenellaceae_ChristensenellaceaeR.7group_NA.54	1	1	1	1	1	1	1	1	1	1	1
835	Bacteria_Planctomycetota_Planctomycetes_Pirellulales_Pirellulaceae_Termiteplanctomycetecluster_NA.5	1	1	1	1	1	1	1	1	1	1	1
836	Bacteria_Firmicutes_Clostridia_Oscillospirales_Butyricicoccaceae_UCG.009_NA.7	1	1	1	1	1	1	1	1	1	1	0
837	Bacteria_Desulfobacterota_Desulfovibrionia_Desulfovibrionales_Desulfovibrionaceae_NA_NA.9	1	1	1	1	1	1	1	1	1	1	1
838	Bacteria_Firmicutes_Clostridia_Peptostreptococcales.Tissierellales_Anaerovoracaceae_NA_NA.11	1	1	1	1	1	1	1	1	1	1	0
839	Bacteria_Firmicutes_Clostridia_Lachnospirales_Lachnospiraceae_NA_NA.21	1	1	1	1	1	1	1	1	1	1	1
840	Bacteria_Desulfobacterota_Desulfobacteria_Desulfobacterales_NA_NA_NA.4	1	1	1	1	1	1	1	1	0	0	1
841	Bacteria_Firmicutes_Clostridia_Oscillospirales_Ruminococcaceae_NA_NA.47	0	0	0	1	1	0	1	0	0	0	1
842	Bacteria_Actinobacteriota_Coriobacteriia_Coriobacteriales_CoriobacterialesIncertaeSedis_Raoultibacter_NA.6	1	1	1	1	1	1	1	0	1	1	1
843	Bacteria_Bacteroidota_Bacteroidia_Bacteroidales_Rikenellaceae_Alistipes_NA.37	1	1	1	1	1	1	1	1	1	1	0
844	Bacteria_Firmicutes_Clostridia_Christensenellales_Christensenellaceae_ChristensenellaceaeR.7group_NA.55	0	1	1	0	1	1	1	1	1	1	1
845	Bacteria_Firmicutes_Clostridia_Lachnospirales_Lachnospiraceae_NA_NA.22	1	0	1	0	1	1	0	1	1	1	0
846	Bacteria_Actinobacteriota_Coriobacteriia_Coriobacteriales_CoriobacterialesIncertaeSedis_NA_NA.3	0	1	0	1	1	1	1	1	0	1	1
847	Bacteria_Firmicutes_Bacilli_Erysipelotrichales_Erysipelatoclostridiaceae_UCG.004_NA.4	1	0	1	1	0	0	1	1	1	1	0
848	Bacteria_Firmicutes_Clostridia_Lachnospirales_Lachnospiraceae_Lachnoclostridium_NA.6	0	1	1	1	0	0	1	1	1	1	0
849	Bacteria_Firmicutes_Clostridia_Christensenellales_Christensenellaceae_ChristensenellaceaeR.7group_NA.56	0	1	1	1	1	1	1	0	0	1	1
850	Bacteria_Bacteroidota_Bacteroidia_Bacteroidales_Paludibacteraceae_Paludibacter_NA.4	1	1	1	1	1	1	1	1	1	1	0
851	Bacteria_Firmicutes_Clostridia_Peptococcales_Peptococcaceae_NA_NA.10	1	1	1	1	1	1	1	1	1	1	0
852	Bacteria_Firmicutes_Bacilli_Acholeplasmatales_Acholeplasmataceae_Acholeplasma_NA.8	1	0	0	0	0	0	0	1	1	1	0
853	Bacteria_Firmicutes_Clostridia_Oscillospirales_Ruminococcaceae_CandidatusSoleaferrea_NA.11	0	1	1	1	1	1	1	1	1	1	1
854	Bacteria_Firmicutes_Clostridia_Oscillospirales_Oscillospiraceae_NK4A214group_NA.3	0	1	1	1	1	1	1	0	1	0	0
855	Bacteria_Firmicutes_Clostridia_Lachnospirales_Lachnospiraceae_IncertaeSedis_NA.8	1	0	1	1	0	0	1	0	1	1	1
856	Bacteria_Firmicutes_Bacilli_RF39_NA_NA_NA.8	0	0	0	0	1	0	1	0	0	0	1
857	Bacteria_Firmicutes_Clostridia_Christensenellales_Christensenellaceae_ChristensenellaceaeR.7group_NA.57	1	1	1	1	1	1	1	0	0	1	1
858	Bacteria_Bacteroidota_Bacteroidia_Bacteroidales_Marinilabiliaceae_NA_NA.3	0	1	1	1	1	1	1	1	1	1	0
859	Bacteria_Firmicutes_Clostridia_ClostridiaUCG.014_NA_NA_NA.6	1	1	1	0	0	1	1	1	1	1	0
860	Bacteria_Verrucomicrobiota_Kiritimatiellae_WCHB1.41_NA_NA_NA.2	1	1	1	1	1	1	1	1	1	1	0
861	Bacteria_Bacteroidota_Bacteroidia_Bacteroidales_Paludibacteraceae_NA_NA.6	1	0	1	1	0	1	1	1	1	1	0
862	Bacteria_Firmicutes_Clostridia_Oscillospirales_Ruminococcaceae_NA_NA.48	1	1	1	1	1	1	1	0	1	1	1
863	Bacteria_Bacteroidota_Bacteroidia_Bacteroidales_Paludibacteraceae_Paludibacter_NA.5	1	1	1	1	0	1	1	1	1	1	0
864	Bacteria_Firmicutes_Clostridia_Oscillospirales_Butyricicoccaceae_UCG.009_NA.8	1	1	1	1	1	1	1	1	1	1	1
865	Bacteria_Desulfobacterota_Desulfovibrionia_Desulfovibrionales_Desulfovibrionaceae_Desulfovibrio_NA.90	1	1	0	1	1	1	1	0	1	1	1
866	Bacteria_Planctomycetota_Planctomycetes_Pirellulales_Pirellulaceae_Termiteplanctomycetecluster_NA.6	1	1	1	1	1	0	1	0	1	1	1
867	Bacteria_Firmicutes_Clostridia_ClostridiaUCG.014_NA_NA_NA.7	0	1	0	1	1	1	0	1	0	0	0
868	Bacteria_Firmicutes_Clostridia_Oscillospirales_Butyricicoccaceae_UCG.009_NA.9	1	1	1	1	1	1	1	1	1	1	1
869	Bacteria_Firmicutes_Clostridia_Christensenellales_Christensenellaceae_NA_NA.12	1	1	1	1	1	1	1	1	1	1	0
870	Bacteria_Firmicutes_Clostridia_Oscillospirales_Eubacteriumcoprostanoligenesgroup_NA_NA.7	1	1	1	1	1	1	0	1	1	1	1
871	Bacteria_Firmicutes_Clostridia_Oscillospirales_Oscillospiraceae_NA_NA.6	1	1	1	1	1	1	1	1	0	1	0
872	Bacteria_Firmicutes_Clostridia_Oscillospirales_Eubacteriumcoprostanoligenesgroup_NA_NA.8	1	1	1	1	1	1	0	1	1	1	0
873	Bacteria_Firmicutes_Clostridia_Lachnospirales_Lachnospiraceae_NA_NA.23	1	1	0	1	1	1	1	1	1	1	0
874	Bacteria_Proteobacteria_Alphaproteobacteria_Rhodospirillales_NA_NA_NA.10	1	1	1	1	1	1	1	1	1	1	0
875	Bacteria_Firmicutes_NA_NA_NA_NA_NA.5	1	1	1	1	1	1	1	1	1	1	0
876	Bacteria_Firmicutes_Clostridia_ClostridiaUCG.014_NA_NA_NA.8	1	1	1	1	0	1	0	0	1	1	1
877	Bacteria_Desulfobacterota_Desulfovibrionia_Desulfovibrionales_Desulfovibrionaceae_Desulfovibrio_NA.91	0	1	1	1	1	1	1	0	1	0	1
878	Bacteria_Deferribacterota_Deferribacteres_Deferribacterales_Deferribacteraceae_Mucispirillum_NA.3	0	1	0	1	1	1	1	1	1	1	1
879	Bacteria_Firmicutes_Clostridia_Oscillospirales_Oscillospiraceae_Colidextribacter_NA.5	1	1	1	1	1	1	1	1	0	1	1
880	Bacteria_Bacteroidota_Bacteroidia_Bacteroidales_Rikenellaceae_RikenellaceaeRC9gutgroup_NA.9	0	1	0	1	1	1	1	0	0	0	0
881	Bacteria_Firmicutes_Clostridia_Peptostreptococcales.Tissierellales_Anaerovoracaceae_Anaerovorax_NA.1	1	1	1	1	1	1	1	1	1	1	0
882	Bacteria_Firmicutes_Clostridia_Christensenellales_Christensenellaceae_ChristensenellaceaeR.7group_NA.58	1	0	1	1	1	0	1	1	1	1	1
883	Bacteria_Synergistota_Synergistia_Synergistales_Synergistaceae_CandidatusTammella_NA.5	1	1	0	1	1	1	1	1	1	0	1
884	Bacteria_Firmicutes_Clostridia_NA_NA_NA_NA.11	0	1	0	1	1	1	1	0	0	0	0
885	Bacteria_Firmicutes_Clostridia_Christensenellales_Christensenellaceae_ChristensenellaceaeR.7group_NA.59	1	1	1	1	1	1	1	1	1	1	0
886	Bacteria_Firmicutes_Clostridia_Oscillospirales_Ruminococcaceae_NA_NA.49	1	1	0	1	1	1	1	1	1	0	1
887	Bacteria_Firmicutes_Clostridia_Christensenellales_Christensenellaceae_ChristensenellaceaeR.7group_NA.60	0	1	0	1	1	1	1	0	0	0	1
888	Bacteria_Firmicutes_Clostridia_Oscillospirales_Ruminococcaceae_NA_NA.50	1	1	1	1	1	1	1	1	1	1	1
889	Bacteria_Firmicutes_Clostridia_ClostridiavadinBB60group_NA_NA_NA.9	1	0	1	0	1	0	1	1	1	1	0
890	Bacteria_Firmicutes_Clostridia_Oscillospirales_Ruminococcaceae_NA_NA.51	1	0	1	0	1	0	0	0	1	0	1
891	Bacteria_Desulfobacterota_Desulfovibrionia_Desulfovibrionales_Desulfovibrionaceae_Desulfovibrio_NA.92	1	1	0	1	0	1	1	1	0	0	0
892	Bacteria_Bacteroidota_Bacteroidia_Bacteroidales_Paludibacteraceae_NA_NA.7	1	1	1	1	1	1	1	1	1	1	1
893	Bacteria_Patescibacteria_Gracilibacteria_JGI0000069.P22_NA_NA_NA.2	1	1	1	1	1	1	1	1	1	1	0
894	Bacteria_Rs.K70termitegroup_NA_NA_NA_NA_NA.5	0	1	0	1	1	1	1	1	0	1	1
895	Bacteria_Firmicutes_Clostridia_Peptostreptococcales.Tissierellales_Anaerovoracaceae_Eubacteriumbrachygroup_NA	1	1	0	1	1	1	0	1	1	1	1
896	Bacteria_Desulfobacterota_Desulfobacteria_Desulfobacterales_NA_NA_NA.5	0	1	1	1	1	1	1	1	0	0	1
897	Bacteria_Firmicutes_Clostridia_Oscillospirales_Ruminococcaceae_Paludicola_NA	0	1	0	1	1	1	0	0	0	0	1
898	Bacteria_Planctomycetota_Planctomycetes_Pirellulales_Pirellulaceae_Termiteplanctomycetecluster_NA.7	1	1	0	1	1	1	1	1	1	0	1
899	Bacteria_Bacteroidota_Bacteroidia_Bacteroidales_Rikenellaceae_Alistipes_NA.38	0	1	0	1	1	1	1	0	0	0	0
900	Bacteria_Firmicutes_Bacilli_Acholeplasmatales_Acholeplasmataceae_Acholeplasma_NA.9	1	0	1	1	0	0	1	1	1	1	0
901	Bacteria_Bacteroidota_Bacteroidia_Bacteroidales_Tannerellaceae_CandidatusVestibaculum_NA.2	1	1	0	1	0	1	1	1	1	1	1
902	Bacteria_Firmicutes_Clostridia_Oscillospirales_Ruminococcaceae_NA_NA.52	1	1	1	1	1	1	1	1	1	1	1
903	Bacteria_Firmicutes_Clostridia_Oscillospirales_Oscillospiraceae_NA_NA.7	1	1	0	1	1	1	1	1	1	1	0
904	Bacteria_Firmicutes_Clostridia_Christensenellales_Christensenellaceae_NA_NA.13	1	1	1	1	1	1	1	1	1	1	1
905	Bacteria_Firmicutes_Clostridia_Christensenellales_Christensenellaceae_ChristensenellaceaeR.7group_NA.61	1	1	1	1	1	1	1	1	1	1	1
906	Bacteria_Firmicutes_Clostridia_NA_NA_NA_NA.12	1	1	1	1	1	1	1	1	1	1	1
907	Bacteria_Firmicutes_Clostridia_Oscillospirales_Ruminococcaceae_CandidatusSoleaferrea_NA.12	0	0	1	1	0	1	0	0	1	1	0
908	Bacteria_Firmicutes_Clostridia_Christensenellales_Christensenellaceae_ChristensenellaceaeR.7group_NA.62	0	1	0	1	1	1	1	0	0	0	0
909	Bacteria_Firmicutes_Clostridia_Christensenellales_Christensenellaceae_ChristensenellaceaeR.7group_NA.63	1	0	1	0	1	0	1	1	1	1	1
910	Bacteria_Bacteroidota_Bacteroidia_Bacteroidales_Dysgonomonadaceae_CandidatusSymbiothrix_NA.2	0	1	0	1	1	1	1	0	0	0	0
911	Bacteria_Bacteroidota_Bacteroidia_Bacteroidales_Marinilabiliaceae_NA_NA.4	1	1	1	1	1	1	1	1	1	1	0
912	Bacteria_Elusimicrobiota_Endomicrobia_Endomicrobiales_Endomicrobiaceae_Endomicrobium_NA.4	0	1	0	1	1	1	1	0	0	0	1
913	Bacteria_Firmicutes_Clostridia_Lachnospirales_Lachnospiraceae_Tyzzerella_NA.17	1	1	1	1	0	0	1	1	1	1	0
914	Bacteria_Desulfobacterota_Desulfovibrionia_Desulfovibrionales_Desulfovibrionaceae_Desulfovibrio_NA.93	0	1	1	0	1	1	1	1	1	1	0
915	Bacteria_Bacteroidota_Bacteroidia_Bacteroidales_Tannerellaceae_Parabacteroides_NA.27	0	1	0	1	0	1	0	0	0	0	1
916	Bacteria_Desulfobacterota_Desulfovibrionia_Desulfovibrionales_Desulfovibrionaceae_Desulfovibrio_NA.94	0	0	0	0	0	0	1	1	1	0	0
917	Bacteria_Firmicutes_Clostridia_Christensenellales_Christensenellaceae_ChristensenellaceaeR.7group_NA.64	0	1	0	1	1	1	1	1	1	0	1
918	Bacteria_Firmicutes_Clostridia_Christensenellales_Christensenellaceae_ChristensenellaceaeR.7group_NA.65	1	1	1	0	1	1	1	1	1	1	1
919	Bacteria_Bacteroidota_Bacteroidia_Bacteroidales_Bacteroidaceae_Bacteroides_NA.27	0	1	0	1	0	0	1	0	0	1	0
920	Bacteria_Planctomycetota_vadinHA49_NA_NA_NA_NA.8	0	1	1	1	1	1	1	1	1	1	1
921	Bacteria_Desulfobacterota_Desulfovibrionia_Desulfovibrionales_Desulfovibrionaceae_Desulfovibrio_NA.95	1	1	0	1	1	1	1	1	0	0	0
922	Bacteria_Firmicutes_Clostridia_Oscillospirales_Oscillospiraceae_Colidextribacter_NA.6	0	0	0	0	0	0	1	0	0	0	0
923	Bacteria_Firmicutes_Clostridia_Oscillospirales_NA_NA_NA.2	1	1	1	1	1	1	1	1	1	1	0
924	Bacteria_Desulfobacterota_Desulfovibrionia_Desulfovibrionales_Desulfovibrionaceae_Desulfovibrio_NA.96	1	1	1	1	1	1	1	1	1	1	0
925	Bacteria_Firmicutes_Bacilli_Lactobacillales_Enterococcaceae_Enterococcus_NA.3	1	0	1	0	1	0	0	1	1	1	0
926	Bacteria_Firmicutes_Clostridia_Christensenellales_Christensenellaceae_ChristensenellaceaeR.7group_NA.66	1	1	1	1	1	1	1	1	1	1	1
927	Bacteria_Firmicutes_Clostridia_Oscillospirales_Ruminococcaceae_NA_NA.53	0	0	0	1	1	0	1	0	0	0	1
928	Bacteria_Verrucomicrobiota_Lentisphaeria_Victivallales_Victivallaceae_NA_NA.1	1	0	1	1	1	0	1	1	1	1	0
929	Bacteria_Planctomycetota_vadinHA49_NA_NA_NA_NA.9	1	1	1	1	1	1	1	1	1	1	1
930	Bacteria_Firmicutes_Clostridia_Peptococcales_Peptococcaceae_NA_NA.11	1	0	1	1	1	1	0	1	0	1	1
931	Bacteria_Bacteroidota_Bacteroidia_Bacteroidales_Dysgonomonadaceae_Dysgonomonas_NA.24	0	1	0	1	1	1	1	0	0	0	0
932	Bacteria_Elusimicrobiota_Elusimicrobia_Elusimicrobiales_Elusimicrobiaceae_Elusimicrobium_NA.4	1	1	1	1	0	0	1	1	1	1	0
933	Bacteria_Firmicutes_Clostridia_NA_NA_NA_NA.13	0	0	0	0	0	0	1	0	0	0	0
934	Bacteria_Firmicutes_Clostridia_Oscillospirales_Ruminococcaceae_NA_NA.54	1	1	1	1	1	1	1	1	1	1	1
935	Bacteria_Firmicutes_Clostridia_Christensenellales_Christensenellaceae_NA_NA.14	0	1	0	1	1	1	1	0	1	0	1
936	Bacteria_Firmicutes_Clostridia_Peptostreptococcales.Tissierellales_Anaerovoracaceae_FamilyXIIIAD3011group_NA.1	1	1	0	1	1	1	1	1	0	1	1
937	Bacteria_Desulfobacterota_Desulfovibrionia_Desulfovibrionales_Desulfovibrionaceae_Desulfovibrio_NA.97	1	1	0	1	1	1	1	1	0	1	1
938	Bacteria_Proteobacteria_Alphaproteobacteria_Rhodospirillales_NA_NA_NA.11	1	0	0	0	0	0	0	1	1	1	0
939	Bacteria_Firmicutes_Clostridia_Peptostreptococcales.Tissierellales_Anaerovoracaceae_NA_NA.12	1	1	1	1	1	1	1	1	1	1	1
940	Bacteria_Firmicutes_Clostridia_Christensenellales_Christensenellaceae_ChristensenellaceaeR.7group_NA.67	1	1	1	1	1	1	1	1	0	0	0
941	Bacteria_Bacteroidota_Bacteroidia_Bacteroidales_Rikenellaceae_RikenellaceaeRC9gutgroup_NA.10	1	1	1	1	1	1	1	1	1	0	0
942	Bacteria_Firmicutes_Clostridia_ClostridiaUCG.014_NA_NA_NA.9	1	0	0	1	0	0	1	0	1	1	0
943	Bacteria_Bacteroidota_Bacteroidia_Bacteroidales_Tannerellaceae_Tannerella_NA.3	0	1	0	1	1	1	1	0	0	0	1
944	Bacteria_Verrucomicrobiota_Lentisphaeria_Victivallales_Victivallaceae_NA_NA.2	1	1	1	1	1	1	1	1	1	1	1
945	Bacteria_Firmicutes_Clostridia_Gracilibacteraceae_NA_NA_NA.1	1	1	1	1	1	1	1	1	1	1	1
946	Bacteria_Firmicutes_Clostridia_Lachnospirales_Lachnospiraceae_Tyzzerella_NA.18	0	0	0	1	0	0	1	1	1	0	1
947	Bacteria_Deferribacterota_Deferribacteres_Deferribacterales_Deferribacteraceae_Mucispirillum_NA.4	1	1	1	1	1	1	1	1	1	1	1
948	Bacteria_Verrucomicrobiota_Kiritimatiellae_WCHB1.41_NA_NA_NA.3	1	1	1	1	1	1	1	1	1	1	0
949	Bacteria_Bacteroidota_Bacteroidia_Bacteroidales_Dysgonomonadaceae_NA_NA.24	1	1	0	1	1	1	0	0	1	1	1
950	Bacteria_Firmicutes_Clostridia_Lachnospirales_Lachnospiraceae_NA_NA.24	0	1	0	1	1	0	1	0	0	0	0
951	Bacteria_Firmicutes_Clostridia_Christensenellales_Christensenellaceae_ChristensenellaceaeR.7group_NA.68	1	0	1	0	0	0	0	1	1	0	0
952	Bacteria_Firmicutes_Clostridia_Peptostreptococcales.Tissierellales_Anaerovoracaceae_Anaerovorax_NA.2	1	1	1	1	1	1	1	1	1	1	0
953	Bacteria_Firmicutes_Syntrophomonadia_Syntrophomonadales_Syntrophomonadaceae_Syntrophomonas_NA	1	1	1	1	1	1	1	1	1	1	0
954	Bacteria_Planctomycetota_vadinHA49_NA_NA_NA_NA.10	1	1	1	1	1	1	1	1	0	0	1
955	Bacteria_Desulfobacterota_Desulfovibrionia_Desulfovibrionales_Desulfovibrionaceae_NA_NA.10	1	1	1	1	1	1	1	1	1	1	1
956	Bacteria_Firmicutes_Clostridia_Christensenellales_Christensenellaceae_ChristensenellaceaeR.7group_NA.69	0	1	0	1	1	1	1	0	1	0	1
957	Bacteria_Desulfobacterota_Desulfovibrionia_Desulfovibrionales_Desulfovibrionaceae_Desulfovibrio_NA.98	0	0	1	1	0	0	1	0	0	1	0
958	Bacteria_Patescibacteria_Gracilibacteria_JGI0000069.P22_NA_NA_NA.3	1	1	0	1	1	1	1	1	0	1	0
959	Bacteria_Planctomycetota_vadinHA49_NA_NA_NA_NA.11	1	0	1	1	0	0	1	1	1	1	1
960	Bacteria_Firmicutes_Clostridia_Oscillospirales_Eubacteriumcoprostanoligenesgroup_NA_NA.9	1	1	0	1	1	1	1	1	1	1	0
961	Bacteria_Synergistota_Synergistia_Synergistales_Synergistaceae_CandidatusTammella_NA.6	0	1	0	1	1	1	1	1	1	0	0
962	Bacteria_Bacteroidota_Bacteroidia_Bacteroidales_NA_NA_NA.7	1	1	1	1	1	1	1	0	1	1	1
963	Bacteria_Firmicutes_Clostridia_Peptostreptococcales.Tissierellales_Gallicola_NA_NA	0	1	0	1	1	1	1	0	0	0	1
964	Bacteria_Firmicutes_Clostridia_Oscillospirales_Ruminococcaceae_NA_NA.55	1	0	1	1	1	0	1	0	1	1	1
965	Bacteria_Firmicutes_Clostridia_Christensenellales_Christensenellaceae_ChristensenellaceaeR.7group_NA.70	1	0	1	1	1	0	0	1	1	1	0
966	Bacteria_Firmicutes_Clostridia_Lachnospirales_Lachnospiraceae_LachnospiraceaeUCG.010_NA.1	1	0	1	0	0	0	0	1	1	1	0
967	Bacteria_Elusimicrobiota_Endomicrobia_Endomicrobiales_Endomicrobiaceae_Endomicrobium_NA.5	1	1	1	1	0	0	1	1	1	1	0
968	Bacteria_Firmicutes_Bacilli_Erysipelotrichales_Erysipelatoclostridiaceae_NA_NA	0	1	0	1	1	1	0	0	0	0	0
969	Bacteria_Desulfobacterota_Desulfovibrionia_Desulfovibrionales_Desulfovibrionaceae_Desulfovibrio_NA.99	0	1	1	1	1	1	1	1	0	0	1
970	Bacteria_Firmicutes_Clostridia_ClostridiavadinBB60group_NA_NA_NA.10	1	1	1	1	1	1	1	1	1	1	1
971	Bacteria_Firmicutes_Clostridia_Oscillospirales_Butyricicoccaceae_UCG.009_NA.10	1	1	1	1	0	0	1	1	1	1	1
972	Bacteria_Desulfobacterota_Desulfovibrionia_Desulfovibrionales_Desulfovibrionaceae_Desulfovibrio_NA.100	1	0	1	1	0	0	1	1	1	1	0
973	Bacteria_Firmicutes_Clostridia_Christensenellales_Christensenellaceae_ChristensenellaceaeR.7group_NA.71	0	1	0	1	0	1	1	0	0	0	0
974	Bacteria_Firmicutes_Clostridia_Oscillospirales_Ruminococcaceae_NA_NA.56	1	0	1	1	1	0	1	1	1	0	1
975	Bacteria_Firmicutes_Clostridia_Oscillospirales_Butyricicoccaceae_UCG.009_NA.11	0	1	0	1	1	1	1	1	1	0	0
976	Bacteria_Proteobacteria_Alphaproteobacteria_NA_NA_NA_NA.1	1	1	1	1	1	1	1	1	1	1	1
977	Bacteria_Firmicutes_Clostridia_Oscillospirales_Ruminococcaceae_Ruminococcus_NA.3	1	0	0	0	0	0	0	0	1	1	0
978	Bacteria_Firmicutes_Clostridia_Oscillospirales_Hydrogenoanaerobacterium_NA_NA.3	1	0	1	0	0	0	0	1	1	1	0
979	Bacteria_Firmicutes_Clostridia_Oscillospirales_Ruminococcaceae_NA_NA.57	0	1	0	1	0	1	1	0	1	0	0
980	Bacteria_Firmicutes_Bacilli_Erysipelotrichales_Erysipelatoclostridiaceae_UCG.004_NA.5	1	0	0	0	0	0	1	1	1	1	0
981	Bacteria_Planctomycetota_Planctomycetes_Pirellulales_Pirellulaceae_CPla.4termitegroup_NA.1	1	1	1	1	1	1	1	0	1	0	1
982	Bacteria_Firmicutes_Clostridia_Oscillospirales_Ruminococcaceae_NA_NA.58	0	1	0	1	1	1	1	0	0	0	1
983	Bacteria_Firmicutes_Clostridia_ClostridiavadinBB60group_NA_NA_NA.11	1	0	1	0	0	0	0	1	1	0	0
984	Bacteria_Firmicutes_Syntrophomonadia_Syntrophomonadales_Syntrophomonadaceae_Pelospora_NA.1	1	1	1	1	1	1	1	1	1	1	0
985	Bacteria_Firmicutes_Bacilli_RF39_NA_NA_NA.9	1	0	1	1	0	1	1	1	1	1	1
986	Bacteria_Firmicutes_Clostridia_ClostridiavadinBB60group_NA_NA_NA.12	1	1	1	1	0	1	1	1	1	1	0
987	Bacteria_Planctomycetota_vadinHA49_NA_NA_NA_NA.12	1	0	0	0	1	0	1	1	1	0	1
988	Bacteria_Firmicutes_Clostridia_Oscillospirales_Ruminococcaceae_IncertaeSedis_NA.7	1	1	1	1	1	1	1	0	1	1	1
989	Bacteria_Firmicutes_Bacilli_RsaHf231_NA_NA_NA.3	1	1	1	1	0	1	1	1	1	1	0
990	Bacteria_Firmicutes_Bacilli_Acholeplasmatales_Acholeplasmataceae_Acholeplasma_NA.10	0	1	1	1	1	1	1	1	1	1	1
991	Bacteria_Firmicutes_Clostridia_Hungateiclostridiaceae_NA_NA_NA	1	1	1	1	1	1	1	1	1	1	0
992	Bacteria_Firmicutes_Clostridia_Lachnospirales_Lachnospiraceae_IncertaeSedis_NA.9	1	1	0	1	0	1	0	0	1	1	0
993	Bacteria_Synergistota_Synergistia_Synergistales_Synergistaceae_CandidatusTammella_NA.7	1	1	0	1	1	0	1	1	1	1	0
994	Bacteria_Firmicutes_Clostridia_Oscillospirales_Ruminococcaceae_NA_NA.59	1	1	1	1	1	1	0	1	1	0	0
995	Archaea_Euryarchaeota_Methanobacteria_Methanobacteriales_Methanobacteriaceae_Methanobrevibacter_NA.5	1	1	1	1	1	1	0	1	1	1	0
996	Bacteria_Patescibacteria_Gracilibacteria_JGI0000069.P22_NA_NA_NA.4	1	1	0	1	1	1	1	1	1	1	1
997	Bacteria_Planctomycetota_vadinHA49_NA_NA_NA_NA.13	1	1	1	1	1	1	1	0	1	1	1
998	Bacteria_Fusobacteriota_Fusobacteriia_Fusobacteriales_Fusobacteriaceae_Fusobacterium_NA	0	0	0	0	0	0	0	1	1	0	0
999	Bacteria_Firmicutes_Clostridia_Oscillospirales_Ruminococcaceae_NA_NA.60	1	0	1	1	1	0	1	0	1	0	1
1000	Bacteria_Firmicutes_NA_NA_NA_NA_NA.6	1	1	1	1	1	1	1	1	1	1	1
1001	Bacteria_Firmicutes_Clostridia_Oscillospirales_Oscillospiraceae_NA_NA.8	0	0	1	0	0	0	0	0	1	0	0
1002	Bacteria_Spirochaetota_Spirochaetia_Spirochaetales_Spirochaetaceae_Treponema_NA.4	1	1	0	1	1	1	1	1	1	1	1
1003	Bacteria_Firmicutes_Clostridia_Christensenellales_Christensenellaceae_ChristensenellaceaeR.7group_NA.72	0	1	0	1	1	1	1	0	0	0	0
1004	Bacteria_Patescibacteria_Gracilibacteria_JGI0000069.P22_NA_NA_NA.5	1	1	1	1	0	1	1	1	1	1	0
1005	Bacteria_Bacteroidota_Bacteroidia_Bacteroidales_COBP4.1termitegroup_NA_NA.2	0	1	0	1	1	1	1	0	0	0	0
1006	Bacteria_Desulfobacterota_Desulfovibrionia_Desulfovibrionales_Desulfovibrionaceae_Desulfovibrio_NA.101	1	1	0	1	1	1	1	1	1	1	0
1007	Bacteria_Firmicutes_Clostridia_Lachnospirales_Lachnospiraceae_Tyzzerella_NA.19	1	1	1	1	1	1	0	1	1	1	1
1008	Bacteria_Firmicutes_Clostridia_Oscillospirales_Ruminococcaceae_CandidatusSoleaferrea_NA.13	1	1	1	1	1	1	1	1	1	1	0
1009	Bacteria_NA_NA_NA_NA_NA_NA.2	1	0	1	1	1	1	0	1	1	1	1
1010	Bacteria_Firmicutes_Clostridia_Christensenellales_Christensenellaceae_NA_NA.15	1	1	1	1	1	1	1	1	0	1	0
1011	Bacteria_Bacteroidota_Bacteroidia_Bacteroidales_Dysgonomonadaceae_Dysgonomonas_NA.26	1	1	1	1	0	1	1	0	1	1	1
1012	Bacteria_Firmicutes_Clostridia_Christensenellales_Christensenellaceae_ChristensenellaceaeR.7group_NA.73	1	0	1	0	0	0	1	1	1	0	0
1013	Bacteria_Bacteroidota_Bacteroidia_Bacteroidales_Tannerellaceae_Parabacteroides_NA.28	0	1	0	1	1	1	1	0	0	0	1
1014	Bacteria_Firmicutes_Bacilli_Erysipelotrichales_Erysipelotrichaceae_Anaerorhabdusfurcosagroup_NA.3	1	1	1	1	0	1	0	1	1	1	1
1015	Bacteria_Firmicutes_Clostridia_Oscillospirales_Ruminococcaceae_CandidatusSoleaferrea_NA.14	1	1	1	1	1	1	1	1	1	1	1
1016	Bacteria_Firmicutes_Clostridia_Christensenellales_Christensenellaceae_ChristensenellaceaeR.7group_NA.74	1	1	1	1	1	1	1	1	1	0	1
1017	Bacteria_Firmicutes_Clostridia_Christensenellales_Christensenellaceae_ChristensenellaceaeR.7group_NA.75	1	0	1	0	0	0	1	1	1	1	0
1018	Bacteria_Proteobacteria_Alphaproteobacteria_NA_NA_NA_NA.2	0	1	0	1	1	1	1	0	0	0	1
1019	Bacteria_Bacteroidota_Bacteroidia_Bacteroidales_Dysgonomonadaceae_NA_NA.25	0	0	0	1	1	0	1	1	0	1	1
1020	Bacteria_Desulfobacterota_Desulfovibrionia_Desulfovibrionales_Desulfovibrionaceae_Desulfovibrio_NA.102	0	1	1	1	1	1	1	0	1	1	1
1021	Bacteria_Synergistota_Synergistia_Synergistales_Synergistaceae_CandidatusTammella_NA.8	1	0	1	1	0	0	1	1	1	1	0
1022	Bacteria_Firmicutes_Clostridia_Oscillospirales_Oscillospiraceae_NK4A214group_NA.4	0	1	0	1	1	1	1	0	1	0	0
1023	Bacteria_Proteobacteria_Alphaproteobacteria_Rhodospirillales_NA_NA_NA.12	1	0	1	1	1	0	1	1	1	1	0
1024	Bacteria_Firmicutes_Clostridia_Christensenellales_Christensenellaceae_ChristensenellaceaeR.7group_NA.76	0	1	1	1	1	1	1	0	1	0	0
1025	Bacteria_Bacteroidota_Bacteroidia_Bacteroidales_NA_NA_NA.8	1	0	0	0	0	0	0	1	1	1	0
1026	Bacteria_Firmicutes_Clostridia_Peptostreptococcales.Tissierellales_Anaerovoracaceae_NA_NA.13	1	0	1	1	1	0	1	1	1	1	1
1027	Bacteria_Firmicutes_Clostridia_Oscillospirales_Butyricicoccaceae_UCG.009_NA.12	1	1	0	1	1	1	1	1	0	0	1
1028	Bacteria_Firmicutes_Clostridia_Peptostreptococcales.Tissierellales_Anaerovoracaceae_NA_NA.14	0	1	0	1	1	1	1	0	1	0	0
1029	Bacteria_Firmicutes_Clostridia_Oscillospirales_Oscillospiraceae_Oscillibacter_NA	0	0	0	0	0	0	1	0	0	0	0
1030	Bacteria_Firmicutes_Clostridia_Lachnospirales_Lachnospiraceae_Tyzzerella_NA.20	0	1	0	1	1	0	1	0	0	0	0
1031	Bacteria_Firmicutes_Clostridia_Lachnospirales_Lachnospiraceae_Lachnoclostridium_NA.7	0	0	0	0	0	0	1	0	0	0	0
1032	Bacteria_Firmicutes_Clostridia_Oscillospirales_Ruminococcaceae_NA_NA.61	1	0	0	1	0	0	0	1	1	1	1
1033	Bacteria_Desulfobacterota_Desulfovibrionia_Desulfovibrionales_Desulfovibrionaceae_Desulfovibrio_NA.103	1	1	1	1	1	1	1	1	1	1	0
1034	Bacteria_Firmicutes_NA_NA_NA_NA_NA.7	0	1	1	0	1	0	1	0	0	1	1
1035	Bacteria_Patescibacteria_Gracilibacteria_JGI0000069.P22_NA_NA_NA.6	1	1	1	1	0	1	1	1	1	1	0
1036	Bacteria_Firmicutes_Clostridia_Christensenellales_Christensenellaceae_NA_NA.16	1	1	1	1	1	1	1	1	1	1	1
1037	Bacteria_Proteobacteria_Alphaproteobacteria_NA_NA_NA_NA.3	1	1	1	1	1	1	1	1	1	1	1
1038	Bacteria_Proteobacteria_Gammaproteobacteria_Pseudomonadales_Pseudomonadaceae_Pseudomonas_NA	1	0	0	0	0	0	0	1	1	1	0
1039	Bacteria_Firmicutes_Clostridia_Christensenellales_Christensenellaceae_ChristensenellaceaeR.7group_NA.77	1	1	1	1	1	1	1	1	1	1	1
1040	Bacteria_Proteobacteria_Alphaproteobacteria_Rhodospirillales_NA_NA_NA.13	1	0	0	0	0	0	0	1	0	1	0
1041	Bacteria_Firmicutes_Clostridia_Peptostreptococcales.Tissierellales_Anaerovoracaceae_NA_NA.15	1	1	1	1	1	1	1	1	1	1	1
1042	Bacteria_Firmicutes_Clostridia_Christensenellales_Christensenellaceae_ChristensenellaceaeR.7group_NA.78	1	1	0	1	1	1	1	1	1	0	1
1043	Bacteria_Firmicutes_Clostridia_Oscillospirales_Ruminococcaceae_CandidatusSoleaferrea_NA.15	1	1	1	1	1	0	1	1	1	1	1
1044	Bacteria_Planctomycetota_vadinHA49_NA_NA_NA_NA.14	0	1	0	1	1	1	1	0	0	0	1
1045	Bacteria_Proteobacteria_Alphaproteobacteria_Rhizobiales_Beijerinckiaceae_Methylobacterium.Methylorubrum_NA	0	0	0	1	1	1	1	0	0	0	1
1046	Bacteria_Firmicutes_Clostridia_Lachnospirales_Lachnospiraceae_Tyzzerella_NA.21	1	1	1	1	1	1	1	1	1	1	1
1047	Bacteria_Firmicutes_Clostridia_Christensenellales_Christensenellaceae_ChristensenellaceaeR.7group_NA.79	1	1	1	1	1	1	1	0	1	1	1
1048	Bacteria_Bacteroidota_Bacteroidia_Bacteroidales_M2PB4.65termitegroup_NA_NA.9	0	1	0	1	1	1	1	0	0	0	0
1049	Bacteria_Firmicutes_Clostridia_Christensenellales_Christensenellaceae_NA_NA.17	1	1	1	1	1	1	1	1	1	1	1
1050	Bacteria_Spirochaetota_Spirochaetia_Spirochaetales_Spirochaetaceae_Sphaerochaeta_NA	0	0	0	1	0	1	1	0	0	0	0
1051	Bacteria_Firmicutes_Clostridia_Oscillospirales_Ruminococcaceae_NA_NA.62	0	0	0	0	1	0	0	0	0	0	1
1052	Bacteria_Firmicutes_Clostridia_Oscillospirales_Oscillospiraceae_NA_NA.10	0	1	0	1	1	1	1	0	0	0	0
1053	Bacteria_Proteobacteria_Alphaproteobacteria_Rhodospirillales_NA_NA_NA.14	1	1	1	1	0	1	1	0	1	1	0
1054	Bacteria_Firmicutes_Bacilli_RF39_NA_NA_NA.11	1	0	1	1	0	0	1	1	1	1	1
1055	Bacteria_Firmicutes_Clostridia_Lachnospirales_Lachnospiraceae_NA_NA.25	1	1	1	1	0	1	1	1	1	1	1
1056	Bacteria_Firmicutes_Clostridia_Oscillospirales_Ruminococcaceae_NA_NA.63	1	0	1	1	1	1	1	0	1	1	1
1057	Bacteria_Bacteroidota_Bacteroidia_Bacteroidales_Marinilabiliaceae_NA_NA.5	1	0	1	1	1	0	1	1	1	1	0
1058	Bacteria_Planctomycetota_Planctomycetes_Pirellulales_Pirellulaceae_Termiteplanctomycetecluster_NA.8	0	1	0	1	1	1	1	0	0	0	1
1059	Bacteria_Desulfobacterota_Desulfovibrionia_Desulfovibrionales_Desulfovibrionaceae_Desulfovibrio_NA.104	1	0	0	0	0	0	0	1	0	1	0
1060	Bacteria_Firmicutes_Clostridia_Christensenellales_Christensenellaceae_ChristensenellaceaeR.7group_NA.80	1	1	1	1	0	1	0	1	1	1	0
1061	Bacteria_Bacteroidota_Bacteroidia_Bacteroidales_Marinilabiliaceae_NA_NA.6	1	1	1	1	0	0	1	1	1	1	0
1062	Bacteria_Bacteroidota_Bacteroidia_Bacteroidales_Williamwhitmaniaceae_NA_NA.1	0	1	0	1	1	1	1	1	0	0	1
1063	Bacteria_Firmicutes_Bacilli_Erysipelotrichales_Erysipelatoclostridiaceae_Erysipelatoclostridium_NA.9	1	1	1	1	1	1	1	0	1	1	1
1064	Bacteria_Firmicutes_Clostridia_Lachnospirales_Lachnospiraceae_Tyzzerella_NA.22	1	1	0	0	1	1	0	1	1	1	0
1065	Bacteria_Planctomycetota_vadinHA49_NA_NA_NA_NA.15	0	0	0	1	0	0	1	1	0	0	1
1066	Bacteria_Firmicutes_Clostridia_Christensenellales_Christensenellaceae_ChristensenellaceaeR.7group_NA.81	1	0	1	1	0	0	1	1	1	1	1
1067	Bacteria_Bacteroidota_Bacteroidia_Bacteroidales_Paludibacteraceae_Paludibacter_NA.6	1	0	1	0	0	1	0	1	1	1	0
1068	Bacteria_Firmicutes_Clostridia_Oscillospirales_Ruminococcaceae_NA_NA.64	1	0	1	1	1	0	0	1	1	1	1
1069	Bacteria_Bacteroidota_Bacteroidia_Bacteroidales_NA_NA_NA.9	0	1	0	1	1	1	0	0	0	0	0
1070	Bacteria_Bacteroidota_Bacteroidia_Bacteroidales_Marinifilaceae_Odoribacter_NA.4	0	0	1	0	0	0	0	1	1	1	0
1071	Bacteria_Firmicutes_Clostridia_Oscillospirales_Oscillospiraceae_NK4A214group_NA.5	0	0	1	0	0	0	0	1	1	0	0
1072	Bacteria_Bacteroidota_Bacteroidia_Bacteroidales_Rikenellaceae_Alistipes_NA.39	1	1	1	1	1	1	1	0	1	0	0
1073	Bacteria_Firmicutes_Clostridia_ClostridiavadinBB60group_NA_NA_NA.13	0	1	0	1	1	0	1	0	0	0	0
1074	Bacteria_Proteobacteria_Alphaproteobacteria_NA_NA_NA_NA.4	1	1	1	1	1	1	1	1	1	1	0
1075	Bacteria_Firmicutes_Bacilli_Lactobacillales_NA_NA_NA.2	0	1	0	1	0	0	0	0	0	0	0
1076	Bacteria_Firmicutes_Clostridia_Oscillospirales_UCG.010_NA_NA.5	1	1	0	1	1	1	1	1	1	1	0
1077	Bacteria_Firmicutes_Clostridia_Oscillospirales_Ruminococcaceae_NA_NA.65	1	1	1	1	0	1	1	1	1	1	0
1078	Bacteria_Firmicutes_Clostridia_ClostridiavadinBB60group_NA_NA_NA.14	1	1	1	1	1	1	1	1	1	1	1
1079	Bacteria_Firmicutes_Clostridia_Lachnospirales_Lachnospiraceae_NA_NA.26	0	0	1	0	0	1	0	0	1	0	0
1080	Bacteria_Firmicutes_Clostridia_Oscillospirales_Ruminococcaceae_CandidatusSoleaferrea_NA.16	1	1	1	1	1	1	1	1	1	0	1
1081	Bacteria_Firmicutes_Clostridia_Oscillospirales_Oscillospiraceae_Papillibacter_NA	1	1	1	1	1	1	1	0	1	1	1
1082	Bacteria_Elusimicrobiota_Rs.M47_NA_NA_NA_NA	1	1	1	0	0	1	1	1	1	1	0
1083	Bacteria_Firmicutes_Clostridia_Oscillospirales_Eubacteriumcoprostanoligenesgroup_NA_NA.10	1	1	1	1	1	1	0	1	1	1	0
1084	Bacteria_Firmicutes_Bacilli_Acholeplasmatales_Acholeplasmataceae_Acholeplasma_NA.11	0	0	0	1	1	1	1	0	0	0	0
1085	Bacteria_Firmicutes_Clostridia_Christensenellales_Christensenellaceae_ChristensenellaceaeR.7group_NA.82	1	1	1	1	1	1	0	0	1	1	1
1086	Bacteria_Rs.K70termitegroup_NA_NA_NA_NA_NA.6	1	1	0	1	0	1	1	0	0	0	1
1087	Bacteria_Bacteroidota_Bacteroidia_Bacteroidales_Tannerellaceae_NA_NA.9	0	0	0	1	0	0	0	0	0	0	0
1088	Bacteria_Firmicutes_Clostridia_Oscillospirales_Oscillospiraceae_UCG.007_NA	1	1	0	1	1	1	1	1	0	0	0
1089	Bacteria_Bacteroidota_Bacteroidia_Bacteroidales_Rikenellaceae_Alistipes_NA.40	1	1	1	0	0	0	1	1	1	1	0
1090	Bacteria_Firmicutes_Bacilli_Erysipelotrichales_Erysipelatoclostridiaceae_UCG.004_NA.6	1	0	1	1	0	1	1	1	1	1	0
1091	Bacteria_Bacteroidota_Bacteroidia_Bacteroidales_Paludibacteraceae_NA_NA.8	1	1	0	1	0	0	1	1	1	1	0
1092	Bacteria_Bacteroidota_Bacteroidia_Bacteroidales_Dysgonomonadaceae_Dysgonomonas_NA.27	0	1	0	1	1	1	1	1	1	1	1
1093	Bacteria_Firmicutes_Clostridia_ClostridiavadinBB60group_NA_NA_NA.15	1	1	1	1	1	1	1	1	1	1	1
1094	Bacteria_Firmicutes_Clostridia_Christensenellales_Christensenellaceae_ChristensenellaceaeR.7group_NA.83	1	0	1	0	1	0	1	1	1	0	1
1095	Bacteria_Planctomycetota_Planctomycetes_Pirellulales_Pirellulaceae_Termiteplanctomycetecluster_NA.9	1	1	1	1	1	1	1	1	0	1	1
1096	Bacteria_Firmicutes_Clostridia_Oscillospirales_Eubacteriumcoprostanoligenesgroup_NA_NA.11	1	1	1	1	1	1	0	1	1	1	0
1097	Bacteria_Desulfobacterota_Desulfobacteria_Desulfobacterales_NA_NA_NA.6	0	1	0	1	1	1	0	0	0	0	1
1098	Bacteria_Firmicutes_Clostridia_ClostridiavadinBB60group_NA_NA_NA.16	1	1	0	1	0	1	1	1	1	1	0
1099	Bacteria_Firmicutes_Clostridia_Christensenellales_Christensenellaceae_ChristensenellaceaeR.7group_NA.84	1	0	0	0	1	0	1	1	0	0	1
1100	Bacteria_Actinobacteriota_Actinobacteria_Actinomycetales_Actinomycetaceae_Actinomyces_NA	1	0	1	0	0	0	0	1	1	1	1
1101	Bacteria_Desulfobacterota_Desulfovibrionia_Desulfovibrionales_Desulfovibrionaceae_Desulfovibrio_NA.105	1	1	1	1	0	1	1	1	1	1	0
1102	Bacteria_Firmicutes_Clostridia_Oscillospirales_Ruminococcaceae_NA_NA.66	1	0	1	0	1	0	1	1	0	0	0
1103	Bacteria_Firmicutes_Clostridia_Christensenellales_Christensenellaceae_ChristensenellaceaeR.7group_NA.85	1	1	0	1	1	1	1	0	1	0	1
1104	Bacteria_Verrucomicrobiota_Verrucomicrobiae_Opitutales_Puniceicoccaceae_Cerasicoccus_NA	1	1	1	1	0	1	1	0	1	1	0
1105	Bacteria_Desulfobacterota_Desulfarculia_Desulfarculales_NA_NA_NA.1	1	1	1	1	1	1	1	1	1	1	0
1106	Bacteria_Desulfobacterota_Desulfovibrionia_Desulfovibrionales_Desulfovibrionaceae_Desulfovibrio_NA.106	1	0	1	1	1	0	1	1	1	1	0
1107	Bacteria_Patescibacteria_Gracilibacteria_JGI0000069.P22_NA_NA_NA.7	1	1	0	1	0	0	1	1	1	1	0
1108	Bacteria_Bacteroidota_Bacteroidia_Bacteroidales_Rikenellaceae_Alistipes_NA.41	0	1	0	1	1	1	1	0	0	0	1
1109	Bacteria_Firmicutes_Clostridia_Christensenellales_Christensenellaceae_ChristensenellaceaeR.7group_NA.86	1	1	1	1	1	1	1	0	1	1	1
1110	Bacteria_Firmicutes_Clostridia_Oscillospirales_Ruminococcaceae_CandidatusSoleaferrea_NA.17	1	1	1	1	0	1	1	1	1	0	0
1111	Bacteria_Firmicutes_Clostridia_Oscillospirales_Ruminococcaceae_CandidatusSoleaferrea_NA.18	1	0	1	1	0	0	1	1	1	1	0
1112	Bacteria_Deferribacterota_Deferribacteres_Deferribacterales_Deferribacteraceae_Mucispirillum_NA.5	1	1	1	1	1	1	1	1	1	1	1
1113	Bacteria_Firmicutes_Clostridia_Oscillospirales_Ruminococcaceae_NA_NA.67	0	1	0	1	1	1	1	0	0	0	1
1114	Bacteria_Firmicutes_Clostridia_Peptococcales_Peptococcaceae_NA_NA.12	1	1	1	1	1	1	1	1	1	1	1
1115	Bacteria_Firmicutes_Clostridia_Christensenellales_Christensenellaceae_ChristensenellaceaeR.7group_NA.87	1	0	1	0	1	0	1	1	1	0	1
1116	Bacteria_Firmicutes_Clostridia_Lachnospirales_Lachnospiraceae_Tyzzerella_NA.23	1	0	1	0	0	0	0	1	1	0	0
1117	Bacteria_Firmicutes_Clostridia_Oscillospirales_Ruminococcaceae_NA_NA.68	1	0	1	0	1	1	1	1	1	0	1
1118	Bacteria_Bacteroidota_Bacteroidia_Bacteroidales_Dysgonomonadaceae_NA_NA.26	0	1	0	1	0	1	0	0	0	0	0
1119	Bacteria_Firmicutes_Bacilli_RF39_NA_NA_NA.12	0	1	0	0	1	1	1	0	0	0	1
1120	Bacteria_Firmicutes_Clostridia_Oscillospirales_UCG.010_NA_NA.6	1	1	0	1	1	1	1	1	1	0	1
1121	Bacteria_Firmicutes_Clostridia_Oscillospirales_Ruminococcaceae_NA_NA.69	0	1	1	1	1	1	1	0	1	0	0
1122	Bacteria_Firmicutes_Bacilli_Erysipelotrichales_Erysipelatoclostridiaceae_Erysipelatoclostridium_NA.10	1	1	0	1	0	1	1	0	0	0	0
1123	Bacteria_Firmicutes_Clostridia_Oscillospirales_Ruminococcaceae_UCG.001_NA	1	0	1	1	0	1	0	0	1	1	1
1124	Bacteria_Firmicutes_Clostridia_Christensenellales_Christensenellaceae_ChristensenellaceaeR.7group_NA.88	1	1	1	1	1	1	1	0	1	0	0
1125	Bacteria_Firmicutes_Bacilli_RF39_NA_NA_NA.13	0	1	0	0	0	0	0	1	0	0	1
1126	Bacteria_Firmicutes_Clostridia_ClostridiaUCG.014_NA_NA_NA.10	0	1	0	0	1	0	1	0	1	1	0
1127	Bacteria_Proteobacteria_Alphaproteobacteria_Rhodospirillales_NA_NA_NA.15	1	1	1	1	1	1	1	1	1	1	0
1128	Bacteria_Patescibacteria_Gracilibacteria_AbsconditabacterialesSR1_NA_NA_NA.3	1	1	1	1	1	1	0	1	1	1	0
1129	Bacteria_Proteobacteria_Gammaproteobacteria_Burkholderiales_NA_NA_NA.2	0	1	0	1	1	1	1	0	0	0	0
1130	Bacteria_Desulfobacterota_Desulfovibrionia_Desulfovibrionales_Desulfovibrionaceae_Desulfovibrio_NA.108	0	1	0	1	1	1	1	0	0	0	0
1131	Bacteria_Planctomycetota_vadinHA49_NA_NA_NA_NA.16	1	1	0	1	1	1	1	0	0	0	1
1132	Bacteria_Firmicutes_Clostridia_Christensenellales_Christensenellaceae_ChristensenellaceaeR.7group_NA.89	1	1	0	0	1	1	1	1	1	1	0
1133	Bacteria_Firmicutes_Clostridia_Peptostreptococcales.Tissierellales_Anaerovoracaceae_NA_NA.16	1	0	0	1	1	1	1	1	0	1	1
1134	Bacteria_Firmicutes_Clostridia_Oscillospirales_Ruminococcaceae_Fournierella_NA.3	0	1	0	0	1	1	1	1	0	0	0
1135	Bacteria_Bacteroidota_Kapabacteria_Kapabacteriales_NA_NA_NA	1	1	0	1	1	1	1	1	1	0	0
1136	Bacteria_Bacteroidota_Bacteroidia_Bacteroidales_Tannerellaceae_Tannerella_NA.4	1	1	1	1	1	1	1	1	1	1	0
1137	Bacteria_Desulfobacterota_Desulfovibrionia_Desulfovibrionales_Desulfovibrionaceae_Desulfovibrio_NA.109	1	0	0	0	0	0	1	1	0	1	0
1138	Bacteria_Firmicutes_Clostridia_Oscillospirales_Oscillospiraceae_NA_NA.11	1	1	1	1	1	1	0	1	1	1	0
1139	Bacteria_Planctomycetota_vadinHA49_NA_NA_NA_NA.17	1	1	1	1	1	1	1	1	1	1	1
1140	Bacteria_Desulfobacterota_Desulfarculia_Desulfarculales_NA_NA_NA.2	1	1	1	0	1	0	1	1	1	1	0
1141	Bacteria_Firmicutes_Clostridia_Oscillospirales_Ruminococcaceae_CandidatusSoleaferrea_NA.19	1	1	0	1	1	1	1	1	1	0	0
1142	Bacteria_Bacteroidota_Bacteroidia_Bacteroidales_Dysgonomonadaceae_Dysgonomonas_NA.28	1	0	1	0	0	0	0	0	1	1	1
1143	Bacteria_Bacteroidota_Bacteroidia_Bacteroidales_Dysgonomonadaceae_NA_NA.27	0	0	1	0	0	0	0	1	0	0	0
1144	Bacteria_Deferribacterota_Deferribacteres_Deferribacterales_Deferribacteraceae_Mucispirillum_NA.6	1	1	1	1	1	1	1	1	0	1	1
1145	Bacteria_Firmicutes_Clostridia_Oscillospirales_Ruminococcaceae_CandidatusSoleaferrea_NA.20	1	0	1	1	0	0	0	1	1	1	0
1146	Bacteria_Bacteroidota_Bacteroidia_Bacteroidales_Dysgonomonadaceae_Dysgonomonas_NA.29	1	0	1	1	0	0	0	1	1	1	0
1147	Bacteria_Proteobacteria_Gammaproteobacteria_Enterobacterales_Yersiniaceae_Serratia_NA	0	1	0	1	1	0	0	0	0	0	0
1148	Bacteria_Firmicutes_Clostridia_Christensenellales_Christensenellaceae_ChristensenellaceaeR.7group_NA.90	0	0	0	1	1	1	1	0	1	0	1
1149	Bacteria_Firmicutes_Clostridia_Peptostreptococcales.Tissierellales_Anaerovoracaceae_NA_NA.17	0	1	1	1	1	1	1	0	1	1	0
1150	Bacteria_Firmicutes_Clostridia_NA_NA_NA_NA.14	0	1	0	0	1	1	1	1	0	0	1
1151	Bacteria_Firmicutes_Bacilli_RF39_NA_NA_NA.14	1	1	1	1	1	1	1	1	1	1	1
1152	Bacteria_Firmicutes_Clostridia_NA_NA_NA_NA.15	1	1	1	1	0	0	1	1	1	1	0
1153	Bacteria_Desulfobacterota_Desulfovibrionia_Desulfovibrionales_Desulfovibrionaceae_Desulfovibrio_NA.110	1	1	0	1	1	1	1	1	0	0	1
1154	Bacteria_Firmicutes_Clostridia_Christensenellales_Christensenellaceae_ChristensenellaceaeR.7group_NA.91	0	1	0	1	1	1	1	0	0	0	1
1155	Bacteria_Firmicutes_Clostridia_Oscillospirales_Oscillospiraceae_NA_NA.12	1	0	1	1	1	0	1	1	1	0	0
1156	Bacteria_Desulfobacterota_Desulfovibrionia_Desulfovibrionales_Desulfovibrionaceae_Desulfovibrio_NA.111	0	1	0	1	1	1	1	0	0	0	1
1157	Bacteria_Desulfobacterota_Desulfovibrionia_Desulfovibrionales_Desulfovibrionaceae_NA_NA.11	1	1	0	1	1	1	1	1	0	1	1
1158	Bacteria_Desulfobacterota_Desulfovibrionia_Desulfovibrionales_Desulfovibrionaceae_Desulfovibrio_NA.112	1	1	0	1	1	1	1	1	0	1	1
1159	Bacteria_Planctomycetota_Planctomycetes_Pirellulales_Pirellulaceae_Termiteplanctomycetecluster_NA.10	1	0	1	1	1	0	1	1	1	0	1
1160	Bacteria_Firmicutes_Clostridia_Lachnospirales_Lachnospiraceae_NA_NA.27	1	1	0	0	1	1	0	0	1	0	0
1161	Bacteria_Firmicutes_Clostridia_Oscillospirales_UCG.010_NA_NA.7	1	1	1	1	1	1	1	1	1	1	0
1162	Bacteria_Firmicutes_Clostridia_Peptococcales_Peptococcaceae_NA_NA.13	1	0	1	0	0	1	0	1	1	1	0
1163	Bacteria_Firmicutes_Clostridia_Christensenellales_Christensenellaceae_ChristensenellaceaeR.7group_NA.92	1	0	1	1	1	1	1	1	1	0	1
1164	Bacteria_Firmicutes_Clostridia_NA_NA_NA_NA.16	1	0	1	1	1	1	1	1	1	1	0
1165	Bacteria_Bacteroidota_Bacteroidia_Bacteroidales_Paludibacteraceae_H1_NA.1	1	0	1	0	0	0	0	1	1	1	0
1166	Bacteria_Firmicutes_Clostridia_Oscillospirales_Ruminococcaceae_NA_NA.70	1	1	1	1	1	1	0	1	1	1	1
1167	Bacteria_Planctomycetota_vadinHA49_NA_NA_NA_NA.18	0	0	0	0	1	0	1	0	0	0	1
1168	Bacteria_Firmicutes_Clostridia_Oscillospirales_Ruminococcaceae_CandidatusSoleaferrea_NA.21	1	0	1	1	1	0	0	1	1	1	0
1169	Bacteria_Bacteroidota_Bacteroidia_Bacteroidales_Dysgonomonadaceae_NA_NA.28	1	1	0	1	1	1	0	0	1	1	1
1170	Bacteria_Desulfobacterota_Desulfovibrionia_Desulfovibrionales_Desulfovibrionaceae_Desulfovibrio_NA.113	0	0	0	1	1	0	1	0	0	0	0
1171	Bacteria_Firmicutes_Clostridia_Oscillospirales_Ruminococcaceae_Anaerotruncus_NA.2	1	1	1	1	1	1	0	1	1	1	1
1172	Bacteria_Verrucomicrobiota_Lentisphaeria_Victivallales_Victivallaceae_NA_NA.3	1	1	1	1	1	1	1	0	1	1	0
1173	Bacteria_Firmicutes_Clostridia_Peptococcales_Peptococcaceae_NA_NA.14	1	1	0	1	1	1	1	1	1	1	0
1174	Bacteria_Firmicutes_Clostridia_Oscillospirales_Ruminococcaceae_NA_NA.71	0	0	0	1	1	0	0	0	1	0	1
1175	Bacteria_Firmicutes_Clostridia_NA_NA_NA_NA.17	0	1	0	1	1	1	1	1	0	1	1
1176	Bacteria_Firmicutes_Clostridia_Eubacteriales_Anaerofustaceae_Anaerofustis_NA.2	1	0	1	1	1	1	1	0	1	1	1
1177	Bacteria_Actinobacteriota_Coriobacteriia_Coriobacteriales_CoriobacterialesIncertaeSedis_Raoultibacter_NA.7	1	0	0	0	1	0	1	0	1	0	1
1178	Bacteria_Actinobacteriota_Actinobacteria_Micrococcales_Micrococcaceae_Kocuria_NA	1	0	1	0	0	0	0	1	1	1	0
1179	Bacteria_Firmicutes_NA_NA_NA_NA_NA.8	0	1	0	1	1	1	0	0	1	0	1
1180	Bacteria_Bacteroidota_Bacteroidia_Bacteroidales_Rikenellaceae_Alistipes_NA.42	0	1	0	1	1	1	0	0	0	0	1
1181	Bacteria_Planctomycetota_Planctomycetes_Pirellulales_Pirellulaceae_Termiteplanctomycetecluster_NA.11	1	1	1	1	1	1	1	1	1	1	1
1182	Bacteria_Synergistota_Synergistia_Synergistales_Synergistaceae_CandidatusTammella_NA.9	1	1	0	1	1	1	1	1	1	1	1
1183	Bacteria_Firmicutes_Clostridia_Oscillospirales_Ruminococcaceae_NA_NA.72	1	0	1	0	1	1	1	1	1	1	1
1184	Bacteria_Firmicutes_Clostridia_Lachnospirales_Lachnospiraceae_Lachnoclostridium_NA.8	0	0	0	1	1	1	1	0	0	0	0
1185	Bacteria_Bacteroidota_Bacteroidia_Bacteroidales_Tannerellaceae_Tannerella_NA.5	1	1	1	1	1	1	1	1	1	1	1
1186	Bacteria_Desulfobacterota_Desulfovibrionia_Desulfovibrionales_Desulfovibrionaceae_Desulfovibrio_NA.114	1	1	1	1	1	1	1	0	1	1	1
1187	Bacteria_Firmicutes_Clostridia_Peptostreptococcales.Tissierellales_Anaerovoracaceae_NA_NA.18	1	0	1	0	1	1	1	1	1	1	1
1188	Bacteria_Firmicutes_Clostridia_Peptococcales_Peptococcaceae_NA_NA.15	0	0	0	1	1	0	1	0	0	1	1
1189	Bacteria_Firmicutes_Clostridia_Christensenellales_Christensenellaceae_ChristensenellaceaeR.7group_NA.93	1	0	1	1	0	0	1	1	1	1	0
1190	Bacteria_Firmicutes_Clostridia_Oscillospirales_Ruminococcaceae_Harryflintia_NA	1	1	1	1	1	1	1	1	0	1	1
1191	Bacteria_Firmicutes_Clostridia_NA_NA_NA_NA.18	0	1	0	0	1	0	1	1	0	1	1
1192	Bacteria_Desulfobacterota_Desulfovibrionia_Desulfovibrionales_Desulfovibrionaceae_Desulfovibrio_NA.115	0	1	0	1	1	1	1	1	0	1	0
1193	Bacteria_Synergistota_Synergistia_Synergistales_Synergistaceae_Fretibacterium_NA	1	0	1	1	1	0	1	1	1	1	0
1194	Bacteria_Firmicutes_Clostridia_Christensenellales_Christensenellaceae_NA_NA.18	1	1	1	1	1	1	1	1	1	0	1
1195	Bacteria_Firmicutes_Clostridia_Oscillospirales_Ruminococcaceae_UCG.001_NA.1	0	0	0	0	0	0	1	0	1	0	0
1196	Bacteria_Firmicutes_Bacilli_Erysipelotrichales_Erysipelotrichaceae_Erysipelothrix_NA.1	1	1	1	1	0	1	0	1	1	1	1
1197	Bacteria_Synergistota_Synergistia_Synergistales_Synergistaceae_CandidatusTammella_NA.10	0	0	0	1	0	0	1	1	0	1	0
1198	Bacteria_Proteobacteria_Alphaproteobacteria_Rhizobiales_Beijerinckiaceae_Methylobacterium.Methylorubrum_NA.1	1	0	0	0	0	0	0	0	0	0	0
1199	Bacteria_Bacteroidota_Bacteroidia_Bacteroidales_Rikenellaceae_Alistipes_NA.43	0	1	0	1	1	1	1	0	1	0	1
1200	Bacteria_Bacteroidota_Bacteroidia_Bacteroidales_Rikenellaceae_Alistipes_NA.44	1	1	1	1	1	1	1	1	1	1	0
1201	Bacteria_Bacteroidota_Bacteroidia_Bacteroidales_Dysgonomonadaceae_NA_NA.29	1	0	0	1	0	0	0	1	1	0	0
1202	Bacteria_Firmicutes_Bacilli_Acholeplasmatales_Acholeplasmataceae_Acholeplasma_NA.12	1	0	0	1	1	0	1	1	0	0	1
1203	Bacteria_Firmicutes_Clostridia_Oscillospirales_Ruminococcaceae_NA_NA.73	0	0	0	0	1	0	0	0	0	0	1
1204	Bacteria_Bacteroidota_Bacteroidia_Bacteroidales_Rikenellaceae_Alistipes_NA.45	1	1	1	1	1	1	0	1	1	1	1
1205	Bacteria_Patescibacteria_Gracilibacteria_JGI0000069.P22_NA_NA_NA.8	1	1	0	1	1	1	1	0	0	1	0
1206	Bacteria_Bacteroidota_Bacteroidia_Bacteroidales_Marinilabiliaceae_NA_NA.7	1	1	1	1	0	1	1	1	1	1	0
1207	Bacteria_Firmicutes_Clostridia_Oscillospirales_Eubacteriumcoprostanoligenesgroup_NA_NA.12	1	1	1	0	1	1	0	1	1	1	0
1208	Bacteria_Planctomycetota_Planctomycetes_Pirellulales_Pirellulaceae_Termiteplanctomycetecluster_NA.12	0	1	0	1	1	1	1	0	0	0	0
1209	Bacteria_NA_NA_NA_NA_NA_NA.3	1	1	1	1	1	1	1	1	1	1	0
1210	Bacteria_Firmicutes_Clostridia_Oscillospirales_Oscillospiraceae_NA_NA.13	1	0	0	1	0	0	0	0	1	0	0
1211	Bacteria_Firmicutes_Clostridia_Oscillospirales_Ruminococcaceae_NA_NA.74	1	1	1	1	1	1	1	1	1	1	0
1212	Bacteria_Proteobacteria_Alphaproteobacteria_Rhodospirillales_NA_NA_NA.17	1	1	0	0	0	0	0	1	0	0	0
1213	Bacteria_Planctomycetota_vadinHA49_NA_NA_NA_NA.19	0	0	0	1	1	0	1	0	1	0	1
1214	Bacteria_Firmicutes_Clostridia_ClostridiavadinBB60group_NA_NA_NA.17	0	0	0	1	1	1	1	0	0	0	0
1215	Bacteria_Synergistota_Synergistia_Synergistales_Synergistaceae_CandidatusTammella_NA.11	0	1	0	1	1	1	1	0	0	0	1
1216	Bacteria_Bacteroidota_Bacteroidia_Bacteroidales_Paludibacteraceae_NA_NA.9	0	1	0	1	1	1	1	1	1	1	0
1217	Bacteria_Firmicutes_Clostridia_Lachnospirales_Lachnospiraceae_NA_NA.28	1	0	1	1	0	0	1	0	1	0	0
1218	Bacteria_Bacteroidota_Bacteroidia_Bacteroidales_Bacteroidaceae_Bacteroides_NA.31	0	1	0	1	1	1	0	0	0	0	1
1219	Bacteria_Firmicutes_Clostridia_Peptococcales_Peptococcaceae_NA_NA.16	1	1	1	1	1	1	1	1	1	1	0
1220	Bacteria_Firmicutes_Clostridia_Oscillospirales_Ruminococcaceae_NA_NA.75	1	0	1	1	1	0	0	1	1	1	0
1221	Bacteria_Firmicutes_Clostridia_ClostridiaUCG.014_NA_NA_NA.11	1	1	0	1	0	1	1	1	1	1	0
1222	Bacteria_Firmicutes_Clostridia_Peptostreptococcales.Tissierellales_Anaerovoracaceae_NA_NA.19	0	1	0	0	1	1	0	0	1	1	1
1223	Bacteria_Desulfobacterota_Desulfovibrionia_Desulfovibrionales_Desulfovibrionaceae_Desulfovibrio_NA.116	1	1	0	1	1	1	1	1	1	1	1
1224	Bacteria_Bacteroidota_Bacteroidia_Bacteroidales_Bacteroidaceae_Bacteroides_NA.32	0	0	0	0	0	0	1	0	0	0	0
1225	Bacteria_Firmicutes_Clostridia_Christensenellales_Christensenellaceae_ChristensenellaceaeR.7group_NA.95	1	0	1	0	0	0	1	1	1	1	1
1226	Bacteria_Desulfobacterota_Desulfovibrionia_Desulfovibrionales_Desulfovibrionaceae_Desulfovibrio_NA.117	1	0	0	0	0	0	1	1	1	1	1
1227	Bacteria_Planctomycetota_vadinHA49_NA_NA_NA_NA.20	0	1	1	1	1	1	1	0	0	1	1
1228	Bacteria_Firmicutes_Clostridia_Oscillospirales_Ruminococcaceae_NA_NA.76	0	0	0	1	1	0	0	1	0	0	1
1229	Bacteria_Planctomycetota_vadinHA49_NA_NA_NA_NA.21	1	1	0	1	1	1	1	1	0	0	1
1230	Bacteria_Firmicutes_Clostridia_Oscillospirales_Ruminococcaceae_CandidatusSoleaferrea_NA.22	1	1	1	1	1	1	1	1	1	1	1
1231	Bacteria_Actinobacteriota_Actinobacteria_Corynebacteriales_Nocardiaceae_Rhodococcus_NA	0	0	0	0	0	0	0	1	0	0	0
1232	Bacteria_Firmicutes_Clostridia_Christensenellales_Christensenellaceae_ChristensenellaceaeR.7group_NA.96	0	1	1	1	1	1	1	0	1	0	1
1233	Bacteria_Desulfobacterota_Desulfovibrionia_Desulfovibrionales_Desulfovibrionaceae_Desulfovibrio_NA.118	1	0	0	1	0	0	0	1	1	1	0
1234	Bacteria_Bacteroidota_Bacteroidia_Bacteroidales_BacteroidetesvadinHA17_NA_NA	1	1	0	1	1	1	1	1	1	1	0
1235	Bacteria_Desulfobacterota_Desulfovibrionia_Desulfovibrionales_Desulfovibrionaceae_Desulfovibrio_NA.119	1	1	0	1	1	1	1	1	0	0	0
1236	Bacteria_Firmicutes_Bacilli_RF39_NA_NA_NA.15	1	0	0	0	0	0	0	1	0	1	0
1237	Bacteria_Firmicutes_Clostridia_Oscillospirales_Eubacteriumcoprostanoligenesgroup_NA_NA.13	1	1	0	1	1	1	1	1	1	0	0
1238	Bacteria_Firmicutes_Clostridia_Oscillospirales_Oscillospiraceae_NK4A214group_NA.6	1	0	1	1	1	0	1	1	1	1	0
1239	Bacteria_Firmicutes_Clostridia_Christensenellales_Christensenellaceae_ChristensenellaceaeR.7group_NA.97	1	0	0	1	1	1	0	0	1	0	1
1240	Bacteria_Firmicutes_Clostridia_Christensenellales_Christensenellaceae_ChristensenellaceaeR.7group_NA.98	1	1	0	1	0	0	1	1	1	1	0
1241	Bacteria_Firmicutes_Clostridia_Christensenellales_Christensenellaceae_ChristensenellaceaeR.7group_NA.99	0	1	1	1	0	0	1	0	1	0	0
1242	Bacteria_Desulfobacterota_Desulfovibrionia_Desulfovibrionales_Desulfovibrionaceae_Desulfovibrio_NA.120	1	0	1	1	0	1	0	1	0	0	1
1243	Bacteria_Firmicutes_Clostridia_Oscillospirales_Oscillospiraceae_Colidextribacter_NA.7	1	1	1	1	1	1	1	1	1	0	1
1244	Bacteria_Planctomycetota_Planctomycetes_Pirellulales_Pirellulaceae_Termiteplanctomycetecluster_NA.13	0	0	0	0	1	0	1	0	0	0	1
1245	Bacteria_Desulfobacterota_Desulfuromonadia_Bradymonadales_NA_NA_NA	1	0	1	0	0	0	0	1	1	1	0
1246	Bacteria_Desulfobacterota_Desulfovibrionia_Desulfovibrionales_Desulfovibrionaceae_Desulfovibrio_NA.121	1	0	1	0	0	0	0	1	0	1	0
1247	Bacteria_Desulfobacterota_Desulfovibrionia_Desulfovibrionales_Desulfovibrionaceae_Desulfovibrio_NA.122	0	0	0	0	0	0	1	0	0	1	0
1248	Bacteria_Actinobacteriota_Coriobacteriia_Coriobacteriales_CoriobacterialesIncertaeSedis_NA_NA.4	0	0	1	0	1	0	1	0	1	0	0
1249	Bacteria_Bacteroidota_Bacteroidia_Bacteroidales_Dysgonomonadaceae_CandidatusSymbiothrix_NA.4	1	0	1	0	0	0	0	1	1	1	0
1250	Bacteria_Firmicutes_Clostridia_Oscillospirales_Ruminococcaceae_CandidatusSoleaferrea_NA.23	1	1	1	1	1	1	1	1	1	0	0
1251	Bacteria_Proteobacteria_Gammaproteobacteria_Burkholderiales_Nitrosomonadaceae_Nitrosomonas_NA	1	0	1	0	0	0	0	1	1	1	0
1252	Bacteria_Fibrobacterota_Fibrobacteria_Fibrobacterales_Fibrobacteraceae_possiblegenus05_NA	1	0	0	1	0	0	0	1	1	1	0
1253	Bacteria_Firmicutes_Bacilli_Erysipelotrichales_Erysipelatoclostridiaceae_UCG.004_NA.7	1	1	0	1	0	1	0	1	1	1	1
1254	Bacteria_Bacteroidota_Bacteroidia_Bacteroidales_Rikenellaceae_Alistipes_NA.46	1	1	1	1	0	1	0	1	1	1	0
1255	Bacteria_Firmicutes_Clostridia_Lachnospirales_Lachnospiraceae_NA_NA.29	1	1	0	1	0	1	1	1	1	1	1
1256	Bacteria_Firmicutes_Clostridia_Peptococcales_Peptococcaceae_NA_NA.17	1	1	0	1	0	1	1	1	1	0	0
1257	Bacteria_Firmicutes_Clostridia_Christensenellales_Christensenellaceae_ChristensenellaceaeR.7group_NA.100	1	1	0	1	1	1	1	0	0	0	0
1258	Bacteria_Firmicutes_Clostridia_NA_NA_NA_NA.19	1	0	1	0	0	0	0	1	1	1	0
1259	Bacteria_Desulfobacterota_Desulfovibrionia_Desulfovibrionales_Desulfovibrionaceae_Desulfovibrio_NA.123	0	1	0	1	0	0	0	0	1	0	1
1260	Bacteria_Firmicutes_Clostridia_Oscillospirales_Ruminococcaceae_NA_NA.77	1	0	0	0	0	0	0	1	1	0	0
1261	Bacteria_Firmicutes_Clostridia_Oscillospirales_Eubacteriumcoprostanoligenesgroup_NA_NA.14	1	1	1	1	1	0	0	1	1	1	1
1262	Bacteria_Firmicutes_Clostridia_Lachnospirales_Lachnospiraceae_Shuttleworthia_NA	1	1	1	1	0	0	0	0	0	1	1
1263	Bacteria_Firmicutes_Clostridia_Oscillospirales_Ruminococcaceae_CandidatusSoleaferrea_NA.24	1	1	0	1	1	0	0	0	0	0	1
1264	Bacteria_Firmicutes_Clostridia_Oscillospirales_Ruminococcaceae_NA_NA.78	1	0	1	1	0	0	0	1	1	1	1
1265	Bacteria_Desulfobacterota_Desulfovibrionia_Desulfovibrionales_Desulfovibrionaceae_Desulfovibrio_NA.124	0	0	0	1	1	1	1	0	0	0	1
1266	Bacteria_Bacteroidota_Bacteroidia_Bacteroidales_Rikenellaceae_Alistipes_NA.47	1	1	1	1	1	1	1	1	1	1	0
1267	Bacteria_Firmicutes_Clostridia_ClostridiaUCG.014_NA_NA_NA.12	1	1	1	1	1	1	1	0	1	1	1
1268	Bacteria_Bacteroidota_Bacteroidia_Bacteroidales_Marinifilaceae_Sanguibacteroides_NA.4	1	1	0	1	1	1	1	0	0	0	1
1269	Bacteria_Firmicutes_Clostridia_Lachnospirales_Lachnospiraceae_Tyzzerella_NA.24	0	1	1	1	1	1	1	1	0	1	1
1270	Bacteria_Actinobacteriota_Coriobacteriia_Coriobacteriales_CoriobacterialesIncertaeSedis_Raoultibacter_NA.8	0	0	0	1	0	0	1	1	0	1	0
1271	Bacteria_Desulfobacterota_Desulfovibrionia_Desulfovibrionales_Desulfovibrionaceae_Desulfovibrio_NA.125	0	1	0	1	0	0	1	1	0	1	0
1272	Bacteria_Proteobacteria_Alphaproteobacteria_Rhodospirillales_NA_NA_NA.18	1	0	0	0	0	0	0	1	0	1	0
1273	Bacteria_Planctomycetota_Planctomycetes_Pirellulales_Pirellulaceae_Termiteplanctomycetecluster_NA.14	1	0	0	0	0	0	1	0	0	0	0
1274	Bacteria_Bacteroidota_Bacteroidia_Bacteroidales_Rikenellaceae_RikenellaceaeRC9gutgroup_NA.11	0	1	0	1	1	1	1	0	0	0	1
1275	Bacteria_Firmicutes_Clostridia_Oscillospirales_Ruminococcaceae_NA_NA.79	1	0	1	1	0	0	1	1	0	0	1
1276	Bacteria_Firmicutes_Clostridia_Lachnospirales_Lachnospiraceae_NA_NA.30	1	0	1	1	0	0	1	0	1	1	1
1277	Bacteria_Bacteroidota_Bacteroidia_Bacteroidales_Paludibacteraceae_NA_NA.10	1	1	0	0	1	1	1	1	1	1	0
1278	Bacteria_Planctomycetota_Planctomycetes_Pirellulales_Pirellulaceae_Termiteplanctomycetecluster_NA.15	0	0	0	0	0	0	1	0	0	0	0
1279	Bacteria_Desulfobacterota_Desulfovibrionia_Desulfovibrionales_Desulfovibrionaceae_Desulfovibrio_NA.126	1	0	0	1	0	0	1	1	0	1	0
1280	Bacteria_Desulfobacterota_Desulfovibrionia_Desulfovibrionales_Desulfovibrionaceae_Desulfovibrio_NA.127	1	1	1	1	1	1	0	1	0	1	1
1281	Bacteria_Firmicutes_NA_NA_NA_NA_NA.9	1	1	1	1	1	1	1	1	1	1	0
1282	Bacteria_Firmicutes_Clostridia_Christensenellales_Christensenellaceae_ChristensenellaceaeR.7group_NA.101	1	0	0	1	1	0	1	1	1	1	1
1283	Bacteria_NA_NA_NA_NA_NA_NA.4	1	0	1	0	0	0	0	1	1	1	0
1284	Bacteria_Firmicutes_Bacilli_RF39_NA_NA_NA.16	1	1	1	1	1	1	1	1	1	1	0
1285	Bacteria_Deferribacterota_Deferribacteres_Deferribacterales_Deferribacteraceae_Mucispirillum_NA.7	1	1	1	1	1	1	1	1	1	1	1
1286	Bacteria_Firmicutes_Syntrophomonadia_Syntrophomonadales_Syntrophomonadaceae_Syntrophomonas_NA.1	1	1	1	1	1	1	1	0	1	1	0
1287	Bacteria_Firmicutes_Clostridia_Oscillospirales_Oscillospiraceae_NA_NA.14	1	1	1	1	1	1	1	1	1	1	0
1288	Bacteria_Spirochaetota_Spirochaetia_Spirochaetales_Spirochaetaceae_Sphaerochaeta_NA.1	1	1	0	1	1	1	1	1	0	1	1
1289	Bacteria_Desulfobacterota_Desulfovibrionia_Desulfovibrionales_Desulfovibrionaceae_Desulfovibrio_NA.128	1	1	1	1	1	1	1	1	0	1	0
1290	Bacteria_Firmicutes_Clostridia_Oscillospirales_Ruminococcaceae_NA_NA.80	0	0	1	0	1	0	0	0	1	1	1
1291	Bacteria_Verrucomicrobiota_Lentisphaeria_Victivallales_NA_NA_NA	1	1	0	1	0	1	1	0	0	0	1
1292	Bacteria_Firmicutes_Clostridia_Christensenellales_Christensenellaceae_NA_NA.19	1	1	1	1	1	1	1	1	1	1	0
1293	Bacteria_Firmicutes_Bacilli_RF39_NA_NA_NA.17	0	0	0	0	0	0	0	0	0	0	1
1294	Bacteria_Synergistota_Synergistia_Synergistales_Synergistaceae_Fretibacterium_NA.1	0	1	0	1	1	0	1	0	0	0	1
1295	Bacteria_Firmicutes_Bacilli_RF39_NA_NA_NA.18	1	1	1	0	0	0	0	0	0	1	1
1296	Bacteria_Firmicutes_Clostridia_Christensenellales_Christensenellaceae_ChristensenellaceaeR.7group_NA.102	1	0	1	1	1	0	1	1	1	0	1
1297	Bacteria_Bacteroidota_Bacteroidia_Bacteroidales_Dysgonomonadaceae_Dysgonomonas_NA.30	0	1	0	1	0	0	0	0	0	0	1
1298	Bacteria_Firmicutes_Clostridia_Christensenellales_Christensenellaceae_ChristensenellaceaeR.7group_NA.103	1	1	1	1	1	1	1	1	0	1	1
1299	Bacteria_Bacteroidota_Bacteroidia_Bacteroidales_Tannerellaceae_Parabacteroides_NA.30	0	0	0	1	1	0	0	0	1	1	0
1300	Bacteria_Firmicutes_Clostridia_Oscillospirales_Ruminococcaceae_NA_NA.81	0	0	0	1	1	0	0	1	0	1	1
1301	Bacteria_Firmicutes_Clostridia_Oscillospirales_Ruminococcaceae_CandidatusSoleaferrea_NA.25	0	0	0	0	1	0	0	0	0	0	1
1302	Bacteria_Firmicutes_Clostridia_Christensenellales_Christensenellaceae_NA_NA.20	0	1	0	1	1	1	1	1	0	0	0
1303	Bacteria_Desulfobacterota_Desulfovibrionia_Desulfovibrionales_Desulfovibrionaceae_Desulfovibrio_NA.129	0	0	0	1	0	0	1	1	0	1	0
1304	Bacteria_Planctomycetota_Planctomycetes_Pirellulales_Pirellulaceae_Termiteplanctomycetecluster_NA.16	1	1	1	1	1	1	1	1	1	0	1
1305	Bacteria_Synergistota_Synergistia_Synergistales_Synergistaceae_CandidatusTammella_NA.12	1	0	1	1	1	0	1	1	1	0	1
1306	Bacteria_Firmicutes_Clostridia_Peptococcales_Peptococcaceae_NA_NA.18	1	1	0	1	1	1	1	1	1	1	0
1307	Bacteria_Deferribacterota_Deferribacteres_Deferribacterales_Deferribacteraceae_Mucispirillum_NA.8	0	1	0	1	1	1	1	1	0	1	1
1308	Bacteria_Planctomycetota_vadinHA49_NA_NA_NA_NA.22	0	1	0	1	1	1	1	0	0	0	1
1309	Bacteria_Firmicutes_Clostridia_Peptococcales_Peptococcaceae_NA_NA.19	0	1	1	1	1	1	1	1	1	0	0
1310	Bacteria_Firmicutes_Clostridia_Christensenellales_Christensenellaceae_ChristensenellaceaeR.7group_NA.104	0	0	0	1	1	1	1	0	0	0	0
1311	Bacteria_Firmicutes_Clostridia_Christensenellales_Christensenellaceae_NA_NA.21	1	0	0	0	1	0	1	0	1	1	1
1312	Bacteria_Firmicutes_Clostridia_Oscillospirales_Ruminococcaceae_NA_NA.82	1	0	1	0	1	0	0	0	1	1	1
1313	Bacteria_Proteobacteria_Alphaproteobacteria_Rhodospirillales_NA_NA_NA.19	1	0	1	1	1	1	0	1	1	1	1
1314	Bacteria_Bacteroidota_Bacteroidia_Bacteroidales_Bacteroidaceae_Bacteroides_NA.33	0	0	1	1	1	0	0	0	0	1	1
1315	Bacteria_Bacteroidota_Bacteroidia_Bacteroidales_Dysgonomonadaceae_NA_NA.30	0	1	0	1	0	1	0	0	0	0	0
1316	Bacteria_Firmicutes_Bacilli_RF39_NA_NA_NA.19	0	1	0	1	0	0	1	1	1	1	0
1317	Bacteria_Bacteroidota_Bacteroidia_Bacteroidales_Dysgonomonadaceae_CandidatusSymbiothrix_NA.5	0	0	0	1	0	1	0	0	0	0	0
1318	Bacteria_Firmicutes_Clostridia_Oscillospirales_Oscillospiraceae_UCG.005_NA	1	1	0	1	1	1	1	0	0	0	0
1319	Bacteria_Firmicutes_Clostridia_Oscillospirales_Ruminococcaceae_CandidatusSoleaferrea_NA.26	1	1	1	0	1	1	1	1	1	1	0
1320	Bacteria_Firmicutes_Clostridia_Oscillospirales_Ruminococcaceae_NA_NA.83	1	0	1	1	1	0	1	1	0	1	1
1321	Bacteria_Firmicutes_Clostridia_Christensenellales_Christensenellaceae_ChristensenellaceaeR.7group_NA.105	0	1	1	1	1	1	1	0	0	0	0
1322	Bacteria_Firmicutes_Clostridia_Oscillospirales_Eubacteriumcoprostanoligenesgroup_NA_NA.15	1	0	0	1	1	1	1	0	1	0	0
1323	Bacteria_Firmicutes_Clostridia_Christensenellales_Christensenellaceae_ChristensenellaceaeR.7group_NA.106	1	1	1	1	1	1	1	1	0	0	1
1324	Bacteria_Desulfobacterota_Desulfovibrionia_Desulfovibrionales_Desulfovibrionaceae_Desulfovibrio_NA.130	1	1	0	1	1	1	1	1	0	0	0
1325	Bacteria_Firmicutes_Clostridia_Christensenellales_Christensenellaceae_ChristensenellaceaeR.7group_NA.107	0	1	1	1	0	0	1	1	1	1	0
1326	Bacteria_Firmicutes_Clostridia_Christensenellales_Christensenellaceae_ChristensenellaceaeR.7group_NA.108	1	0	1	0	1	0	1	0	1	1	0
1327	Bacteria_Firmicutes_Clostridia_Christensenellales_Christensenellaceae_ChristensenellaceaeR.7group_NA.109	1	1	1	1	1	0	1	1	1	1	1
1328	Bacteria_Desulfobacterota_Desulfovibrionia_Desulfovibrionales_Desulfovibrionaceae_Desulfovibrio_NA.131	1	1	1	1	1	1	1	1	0	1	1
1329	Bacteria_Firmicutes_Negativicutes_Acidaminococcales_Acidaminococcaceae_NA_NA.6	0	1	0	1	1	1	1	0	0	0	1
1330	Bacteria_Firmicutes_Clostridia_ClostridiavadinBB60group_NA_NA_NA.18	1	0	1	0	0	0	0	1	1	1	1
1331	Bacteria_Verrucomicrobiota_Lentisphaeria_Victivallales_Victivallaceae_NA_NA.4	1	1	1	1	1	1	1	1	1	1	0
1332	Bacteria_Proteobacteria_Alphaproteobacteria_Rhodospirillales_NA_NA_NA.20	1	0	1	1	1	1	1	1	1	1	0
1333	Bacteria_Desulfobacterota_Desulfovibrionia_Desulfovibrionales_Desulfovibrionaceae_Desulfovibrio_NA.132	1	0	0	1	1	0	1	0	1	0	1
1334	Bacteria_Firmicutes_Clostridia_Lachnospirales_Lachnospiraceae_Tyzzerella_NA.25	1	1	1	1	1	1	0	0	0	1	0
1335	Bacteria_Bacteroidota_Bacteroidia_Bacteroidales_Paludibacteraceae_NA_NA.11	0	1	1	1	0	1	1	1	1	1	0
1336	Bacteria_Firmicutes_Bacilli_Lactobacillales_Lactobacillaceae_Lactobacillus_NA.6	0	0	0	0	0	0	0	0	1	0	0
1337	Bacteria_Firmicutes_Clostridia_Christensenellales_Christensenellaceae_NA_NA.22	1	0	1	1	1	0	1	1	1	1	0
1338	Bacteria_Elusimicrobiota_Elusimicrobia_Elusimicrobiales_Elusimicrobiaceae_Elusimicrobium_NA.5	1	1	0	1	1	0	0	1	1	1	0
1339	Bacteria_Bacteroidota_Bacteroidia_Bacteroidales_Rikenellaceae_Alistipes_NA.48	1	1	1	1	1	1	0	0	0	0	1
1340	Bacteria_Deferribacterota_Deferribacteres_Deferribacterales_Deferribacteraceae_Mucispirillum_NA.9	0	0	0	0	0	0	0	1	0	1	0
1341	Bacteria_Firmicutes_Clostridia_Lachnospirales_Lachnospiraceae_Tuzzerella_NA.1	1	0	1	1	0	0	1	1	1	0	0
1342	Bacteria_Firmicutes_Clostridia_ClostridiaUCG.014_NA_NA_NA.13	0	0	0	0	0	0	0	0	0	0	1
1343	Bacteria_Firmicutes_Clostridia_Christensenellales_Christensenellaceae_ChristensenellaceaeR.7group_NA.110	1	0	1	0	0	0	0	1	1	1	1
1344	Bacteria_Bacteroidota_Bacteroidia_Bacteroidales_Dysgonomonadaceae_Dysgonomonas_NA.32	1	0	1	0	0	1	1	1	1	1	0
1345	Bacteria_Firmicutes_Clostridia_Oscillospirales_Ruminococcaceae_NA_NA.84	1	0	0	0	0	0	0	1	1	1	0
1346	Bacteria_Firmicutes_Bacilli_Erysipelotrichales_Erysipelatoclostridiaceae_UCG.004_NA.8	1	0	1	0	0	0	0	1	1	1	0
1347	Bacteria_Rs.K70termitegroup_NA_NA_NA_NA_NA.7	0	0	1	1	1	0	0	1	0	0	1
1348	Archaea_Euryarchaeota_Methanobacteria_Methanobacteriales_Methanobacteriaceae_Methanobrevibacter_NA.7	0	0	0	1	0	0	0	0	0	0	1
1349	Bacteria_Firmicutes_Clostridia_Peptostreptococcales.Tissierellales_Anaerovoracaceae_NA_NA.20	1	1	1	0	1	0	1	1	1	1	0
1350	Bacteria_Firmicutes_Clostridia_Oscillospirales_Ruminococcaceae_NA_NA.85	1	1	1	1	1	1	1	1	0	1	1
1351	Bacteria_Planctomycetota_Planctomycetes_Pirellulales_Pirellulaceae_Termiteplanctomycetecluster_NA.17	0	0	0	0	0	0	1	0	0	0	0
1352	Bacteria_Firmicutes_Clostridia_Christensenellales_Christensenellaceae_NA_NA.23	1	1	1	1	1	1	1	1	1	0	1
1353	Bacteria_Bacteroidota_Bacteroidia_Bacteroidales_M2PB4.65termitegroup_NA_NA.10	1	0	0	0	0	0	1	0	1	1	0
1354	Bacteria_Bacteroidota_Bacteroidia_Bacteroidales_Rikenellaceae_Alistipes_NA.49	0	1	0	1	1	1	1	0	0	0	1
1355	Bacteria_Firmicutes_Clostridia_Christensenellales_Christensenellaceae_NA_NA.24	1	0	0	0	1	0	1	1	1	1	0
1356	Bacteria_Firmicutes_Clostridia_Oscillospirales_Ruminococcaceae_NA_NA.86	1	1	0	1	1	1	1	1	1	0	1
1357	Bacteria_Firmicutes_Clostridia_Christensenellales_Christensenellaceae_ChristensenellaceaeR.7group_NA.111	1	0	1	0	0	0	0	1	1	0	0
1358	Bacteria_Firmicutes_Bacilli_RF39_NA_NA_NA.20	1	1	1	0	0	0	0	1	0	1	0
1359	Bacteria_Firmicutes_Clostridia_Christensenellales_Christensenellaceae_ChristensenellaceaeR.7group_NA.112	1	1	1	1	1	1	1	0	1	0	1
1360	Bacteria_Firmicutes_Clostridia_Lachnospirales_Lachnospiraceae_Tyzzerella_NA.26	1	1	0	1	1	1	1	1	0	0	1
1361	Bacteria_Synergistota_Synergistia_Synergistales_Synergistaceae_CandidatusTammella_NA.13	0	1	0	1	1	1	1	0	0	0	1
1362	Bacteria_Bacteroidota_Bacteroidia_Bacteroidales_Paludibacteraceae_NA_NA.12	1	1	1	1	1	1	1	1	1	1	0
1363	Bacteria_Desulfobacterota_Desulfarculia_Desulfarculales_NA_NA_NA.3	1	1	1	1	1	1	1	0	0	0	0
1364	Bacteria_Patescibacteria_Gracilibacteria_JGI0000069.P22_NA_NA_NA.9	0	0	0	0	0	0	0	1	0	0	0
1365	Bacteria_Firmicutes_Clostridia_Peptococcales_Peptococcaceae_NA_NA.20	1	0	0	1	1	1	1	1	1	1	1
1366	Bacteria_Proteobacteria_Alphaproteobacteria_Rhodospirillales_NA_NA_NA.21	1	0	1	0	0	0	0	1	1	1	0
1367	Bacteria_Firmicutes_Clostridia_Oscillospirales_Ruminococcaceae_NA_NA.87	0	0	0	0	1	0	0	0	1	1	1
1368	Bacteria_Planctomycetota_vadinHA49_NA_NA_NA_NA.23	1	1	1	1	1	1	0	1	1	0	1
1369	Bacteria_Firmicutes_Clostridia_Christensenellales_Christensenellaceae_ChristensenellaceaeR.7group_NA.113	0	0	1	0	1	0	1	0	0	0	1
1370	Bacteria_Planctomycetota_Planctomycetes_Pirellulales_Pirellulaceae_Termiteplanctomycetecluster_NA.18	1	0	0	1	1	0	1	1	0	1	0
1371	Bacteria_Bacteroidota_Bacteroidia_Bacteroidales_Dysgonomonadaceae_NA_NA.31	1	1	1	1	1	1	1	1	1	1	0
1372	Bacteria_Firmicutes_Clostridia_Christensenellales_Christensenellaceae_ChristensenellaceaeR.7group_NA.114	0	1	0	1	1	1	1	1	0	1	1
1373	Bacteria_Firmicutes_Clostridia_ClostridiavadinBB60group_NA_NA_NA.19	1	0	1	1	0	0	1	1	1	1	1
1374	Bacteria_Firmicutes_Clostridia_Christensenellales_Christensenellaceae_ChristensenellaceaeR.7group_NA.115	0	1	0	1	1	1	0	0	0	0	1
1375	Bacteria_Desulfobacterota_Desulfovibrionia_Desulfovibrionales_Desulfovibrionaceae_Desulfovibrio_NA.133	1	0	0	1	0	0	1	0	0	0	0
1376	Bacteria_Firmicutes_Clostridia_ClostridiavadinBB60group_NA_NA_NA.20	1	0	1	1	1	1	0	1	1	1	0
1377	Bacteria_Firmicutes_Clostridia_Christensenellales_Christensenellaceae_ChristensenellaceaeR.7group_NA.116	1	0	0	0	1	0	1	1	0	1	1
1378	Bacteria_Firmicutes_Clostridia_Christensenellales_Christensenellaceae_ChristensenellaceaeR.7group_NA.117	1	0	1	1	1	0	1	1	1	0	0
1379	Bacteria_Firmicutes_Bacilli_RF39_NA_NA_NA.21	1	1	1	1	1	1	1	1	1	1	0
1380	Bacteria_Firmicutes_Clostridia_NA_NA_NA_NA.20	1	1	1	0	1	1	1	1	1	1	0
1381	Bacteria_Firmicutes_Clostridia_Christensenellales_Christensenellaceae_ChristensenellaceaeR.7group_NA.118	1	0	1	0	0	0	0	1	1	1	0
1382	Bacteria_Firmicutes_Clostridia_Christensenellales_Christensenellaceae_ChristensenellaceaeR.7group_NA.119	1	1	1	1	1	1	1	0	0	1	0
1383	Bacteria_Firmicutes_Bacilli_RF39_NA_NA_NA.22	1	0	1	1	0	0	1	1	1	1	0
1384	Bacteria_Firmicutes_Clostridia_Oscillospirales_Ruminococcaceae_NA_NA.88	0	0	1	0	0	0	0	0	1	1	0
1385	Bacteria_Firmicutes_Clostridia_Oscillospirales_Ruminococcaceae_CandidatusSoleaferrea_NA.27	0	0	1	0	0	0	1	0	1	0	0
1386	Bacteria_Firmicutes_Clostridia_Christensenellales_Christensenellaceae_ChristensenellaceaeR.7group_NA.120	1	0	1	1	1	0	0	1	0	1	1
1387	Bacteria_Firmicutes_Clostridia_Oscillospirales_Ruminococcaceae_NA_NA.89	0	1	0	1	1	0	1	1	0	0	1
1388	Bacteria_Planctomycetota_vadinHA49_NA_NA_NA_NA.24	1	1	0	1	1	1	1	1	1	1	0
1389	Bacteria_Proteobacteria_Alphaproteobacteria_Rhodospirillales_NA_NA_NA.22	1	1	0	1	1	1	1	1	1	1	0
1390	Bacteria_Firmicutes_Clostridia_Christensenellales_Christensenellaceae_ChristensenellaceaeR.7group_NA.121	0	0	0	1	1	0	0	1	0	0	0
1391	Bacteria_Firmicutes_Clostridia_Christensenellales_Christensenellaceae_ChristensenellaceaeR.7group_NA.122	1	1	1	1	0	1	1	1	1	1	0
1392	Bacteria_Firmicutes_Clostridia_Christensenellales_Christensenellaceae_ChristensenellaceaeR.7group_NA.123	0	1	1	1	0	0	0	0	1	1	1
1393	Bacteria_Firmicutes_Clostridia_Oscillospirales_Ruminococcaceae_CandidatusSoleaferrea_NA.28	0	1	1	0	0	1	1	1	1	1	0
1394	Bacteria_Bacteroidota_Bacteroidia_Bacteroidales_Bacteroidaceae_Bacteroides_NA.34	1	0	1	1	0	0	1	0	1	1	0
1395	Bacteria_Firmicutes_Clostridia_Oscillospirales_Ruminococcaceae_NA_NA.91	0	0	0	1	1	0	1	0	0	0	1
1396	Bacteria_Firmicutes_Clostridia_Oscillospirales_Ruminococcaceae_NA_NA.92	1	0	1	1	1	0	1	1	0	0	1
1397	Bacteria_Firmicutes_Clostridia_Christensenellales_Christensenellaceae_ChristensenellaceaeR.7group_NA.124	0	0	1	1	1	0	1	0	0	0	0
1398	Bacteria_Desulfobacterota_Desulfovibrionia_Desulfovibrionales_Desulfovibrionaceae_Desulfovibrio_NA.134	0	1	0	1	1	1	1	1	0	1	0
1399	Bacteria_Firmicutes_Clostridia_Oscillospirales_Ruminococcaceae_NA_NA.93	0	0	1	0	1	0	1	0	0	0	1
1400	Bacteria_Firmicutes_Clostridia_Oscillospirales_Ruminococcaceae_NA_NA.94	1	1	1	0	1	1	1	0	1	1	1
1401	Bacteria_Firmicutes_Clostridia_Christensenellales_Christensenellaceae_ChristensenellaceaeR.7group_NA.125	0	1	0	1	1	1	1	0	0	0	1
1402	Bacteria_Proteobacteria_Gammaproteobacteria_Enterobacterales_Enterobacteriaceae_Shimwellia_NA.1	1	0	0	0	0	0	0	0	1	1	0
1403	Bacteria_Bacteroidota_Bacteroidia_Bacteroidales_Marinilabiliaceae_NA_NA.8	1	0	1	0	0	0	0	1	1	1	0
1404	Bacteria_Spirochaetota_Spirochaetia_Spirochaetales_Spirochaetaceae_Treponema_NA.5	1	0	1	0	1	0	1	1	1	0	0
1405	Bacteria_Firmicutes_Clostridia_Christensenellales_Christensenellaceae_NA_NA.25	0	1	1	1	1	1	1	0	1	1	1
1406	Bacteria_Desulfobacterota_Desulfovibrionia_Desulfovibrionales_Desulfovibrionaceae_Desulfovibrio_NA.135	1	1	1	1	0	1	0	1	1	0	0
1407	Bacteria_Desulfobacterota_Desulfovibrionia_Desulfovibrionales_Desulfovibrionaceae_Desulfovibrio_NA.136	1	1	0	1	0	1	1	1	1	0	0
1408	Bacteria_Firmicutes_Bacilli_Erysipelotrichales_Erysipelatoclostridiaceae_Erysipelatoclostridium_NA.11	0	0	0	1	1	0	1	0	0	0	0
1409	Bacteria_Firmicutes_Clostridia_Oscillospirales_Butyricicoccaceae_UCG.009_NA.13	1	1	0	1	1	1	1	1	0	0	1
1410	Bacteria_Deferribacterota_Deferribacteres_Deferribacterales_Deferribacteraceae_Mucispirillum_NA.10	1	1	1	1	1	0	1	1	1	1	0
1411	Bacteria_Firmicutes_Clostridia_Christensenellales_Christensenellaceae_ChristensenellaceaeR.7group_NA.126	1	1	1	1	1	1	1	1	1	0	0
1412	Bacteria_Verrucomicrobiota_Lentisphaeria_Victivallales_Victivallaceae_NA_NA.5	1	1	1	1	1	1	0	1	1	1	0
1413	Bacteria_Bacteroidota_Bacteroidia_Bacteroidales_Rikenellaceae_Alistipes_NA.50	0	0	0	0	1	1	1	1	1	0	0
1414	Bacteria_Firmicutes_Clostridia_Christensenellales_Christensenellaceae_ChristensenellaceaeR.7group_NA.127	0	0	1	1	0	0	1	0	1	0	0
1415	Bacteria_Firmicutes_Bacilli_RF39_NA_NA_NA.23	1	1	0	0	1	1	1	1	1	0	0
1416	Bacteria_Firmicutes_Clostridia_Hungateiclostridiaceae_NA_NA_NA.1	1	0	1	0	1	0	1	1	1	1	0
1417	Bacteria_Planctomycetota_Planctomycetes_Pirellulales_Pirellulaceae_Termiteplanctomycetecluster_NA.19	1	1	0	1	1	1	1	1	1	1	0
1418	Bacteria_Firmicutes_Clostridia_Peptococcales_Peptococcaceae_NA_NA.21	1	1	0	1	1	1	1	1	1	0	1
1419	Bacteria_Bacteroidota_Bacteroidia_Bacteroidales_Tannerellaceae_NA_NA.10	0	1	0	1	1	1	0	0	1	0	1
1420	Bacteria_Firmicutes_Bacilli_RF39_NA_NA_NA.24	1	1	1	1	0	1	1	0	1	1	0
1421	Bacteria_Firmicutes_Clostridia_Christensenellales_Christensenellaceae_ChristensenellaceaeR.7group_NA.128	0	0	0	1	0	0	1	0	0	0	0
1422	Bacteria_Firmicutes_Clostridia_NA_NA_NA_NA.21	0	0	1	0	1	0	0	1	1	0	1
1423	Bacteria_Firmicutes_Clostridia_Oscillospirales_Oscillospiraceae_NK4A214group_NA.7	0	0	0	0	1	0	1	0	0	0	1
1424	Bacteria_Spirochaetota_Spirochaetia_Spirochaetales_Spirochaetaceae_Treponema_NA.6	0	1	0	1	1	1	1	1	0	0	1
1425	Bacteria_Proteobacteria_Alphaproteobacteria_NA_NA_NA_NA.5	1	1	0	1	0	0	0	1	1	1	0
1426	Bacteria_Firmicutes_Clostridia_Christensenellales_Christensenellaceae_ChristensenellaceaeR.7group_NA.129	0	1	0	1	1	1	1	0	0	0	1
1427	Bacteria_Firmicutes_Clostridia_Oscillospirales_Eubacteriumcoprostanoligenesgroup_NA_NA.16	0	1	0	1	1	1	1	1	0	0	0
1428	Bacteria_Firmicutes_Clostridia_Christensenellales_Christensenellaceae_ChristensenellaceaeR.7group_NA.130	1	1	1	0	1	1	1	1	1	1	1
1429	Bacteria_Firmicutes_Clostridia_Oscillospirales_Ruminococcaceae_NA_NA.95	0	0	0	1	1	0	0	0	1	1	1
1430	Bacteria_Bacteroidota_Bacteroidia_Bacteroidales_Bacteroidaceae_Bacteroides_NA.35	0	0	0	0	0	0	1	0	0	0	0
1431	Bacteria_Firmicutes_Clostridia_Oscillospirales_Ruminococcaceae_UCG.001_NA.2	0	0	0	0	0	0	1	0	0	0	0
1432	Bacteria_Firmicutes_Clostridia_Christensenellales_Christensenellaceae_NA_NA.26	0	1	1	1	1	1	0	1	1	0	1
1433	Bacteria_Firmicutes_Clostridia_Lachnospirales_Lachnospiraceae_NA_NA.31	1	0	0	0	0	0	1	0	0	0	0
1434	Bacteria_Firmicutes_Clostridia_Oscillospirales_Oscillospiraceae_Papillibacter_NA.1	1	0	0	0	0	0	1	0	1	0	0
1435	Bacteria_Firmicutes_Clostridia_Monoglobales_Monoglobaceae_Monoglobus_NA	1	1	1	1	1	1	1	1	1	0	0
1436	Bacteria_Firmicutes_Clostridia_Oscillospirales_Ruminococcaceae_NA_NA.96	1	0	0	1	1	1	0	1	0	1	1
1437	Bacteria_Firmicutes_Clostridia_Peptococcales_Peptococcaceae_NA_NA.22	0	1	0	1	1	1	1	0	0	0	1
1438	Bacteria_Firmicutes_Clostridia_Oscillospirales_Ruminococcaceae_NA_NA.97	1	0	1	1	1	0	1	0	0	0	1
1439	Bacteria_Bacteroidota_Bacteroidia_Cytophagales_Spirosomaceae_Pseudarcicella_NA	1	0	0	0	0	0	0	1	1	1	0
1440	Bacteria_Firmicutes_Bacilli_Lactobacillales_Enterococcaceae_Enterococcus_NA.4	0	1	0	1	1	1	1	0	0	0	0
1441	Bacteria_Spirochaetota_Spirochaetia_Spirochaetales_Spirochaetaceae_Treponema_NA.7	0	1	0	1	1	1	1	0	0	1	1
1442	Bacteria_Firmicutes_Clostridia_Christensenellales_Christensenellaceae_ChristensenellaceaeR.7group_NA.131	0	1	1	1	1	1	1	0	0	0	0
1443	Bacteria_Planctomycetota_vadinHA49_NA_NA_NA_NA.25	0	1	0	1	1	1	1	0	0	0	1
1444	Bacteria_Firmicutes_Clostridia_Oscillospirales_Oscillospiraceae_Colidextribacter_NA.8	0	1	0	1	1	1	1	0	0	0	0
1445	Bacteria_Firmicutes_Clostridia_Oscillospirales_Oscillospiraceae_NA_NA.16	1	1	0	0	1	1	1	0	0	1	0
1446	Bacteria_Verrucomicrobiota_Lentisphaeria_Victivallales_Victivallaceae_NA_NA.6	1	1	1	1	1	1	0	1	1	1	1
1447	Bacteria_Firmicutes_Clostridia_Peptostreptococcales.Tissierellales_Anaerovoracaceae_NA_NA.21	1	1	0	1	1	1	1	1	1	1	0
1448	Bacteria_Actinobacteriota_Actinobacteria_Micrococcales_NA_NA_NA	1	1	1	1	1	1	1	1	1	1	1
1449	Bacteria_Desulfobacterota_Desulfovibrionia_Desulfovibrionales_Desulfovibrionaceae_Desulfovibrio_NA.137	0	1	0	0	1	0	1	0	0	0	0
1450	Bacteria_Firmicutes_Clostridia_Oscillospirales_Ruminococcaceae_NA_NA.98	0	1	0	1	1	1	1	0	0	0	1
1451	Bacteria_Bacteroidota_Bacteroidia_Bacteroidales_Rikenellaceae_Alistipes_NA.51	0	1	1	1	1	1	1	1	1	0	1
1452	Bacteria_Firmicutes_Clostridia_ClostridiavadinBB60group_NA_NA_NA.21	0	1	0	1	1	1	1	0	0	0	1
1453	Bacteria_Rs.K70termitegroup_NA_NA_NA_NA_NA.8	0	1	0	1	0	0	1	1	0	0	0
1454	Bacteria_Planctomycetota_vadinHA49_NA_NA_NA_NA.26	1	1	1	1	0	1	0	0	1	0	0
1455	Bacteria_Firmicutes_Clostridia_Lachnospirales_Lachnospiraceae_Tyzzerella_NA.27	0	1	0	1	1	1	1	0	0	0	0
1456	Bacteria_Firmicutes_Clostridia_Oscillospirales_Ruminococcaceae_NA_NA.99	0	0	0	0	0	1	1	0	1	0	0
1457	Bacteria_Firmicutes_Clostridia_Oscillospirales_Ruminococcaceae_NA_NA.100	1	1	0	1	1	1	1	1	1	1	1
1458	Bacteria_Planctomycetota_Planctomycetes_Pirellulales_Pirellulaceae_CPla.4termitegroup_NA.2	0	1	0	0	1	1	1	0	0	0	0
1459	Bacteria_Planctomycetota_Planctomycetes_Pirellulales_Pirellulaceae_Termiteplanctomycetecluster_NA.20	0	0	1	1	0	0	1	0	1	1	0
1460	Bacteria_Firmicutes_Clostridia_Lachnospirales_Lachnospiraceae_Tyzzerella_NA.28	1	1	1	1	1	1	1	0	1	1	0
1461	Bacteria_Firmicutes_Clostridia_Oscillospirales_Oscillospiraceae_NA_NA.17	0	1	0	1	0	1	1	0	0	0	0
1462	Bacteria_Desulfobacterota_Desulfovibrionia_Desulfovibrionales_Desulfovibrionaceae_Desulfovibrio_NA.138	0	0	0	1	0	0	1	1	1	1	0
1463	Bacteria_Firmicutes_Bacilli_RF39_NA_NA_NA.25	1	0	1	0	0	0	0	1	1	0	0
1464	Bacteria_Firmicutes_Clostridia_Christensenellales_Christensenellaceae_ChristensenellaceaeR.7group_NA.132	0	1	0	1	1	1	1	0	0	0	0
1465	Bacteria_Planctomycetota_vadinHA49_NA_NA_NA_NA.27	1	0	0	0	1	1	1	0	0	0	1
1466	Bacteria_Firmicutes_Clostridia_Christensenellales_Christensenellaceae_NA_NA.27	1	1	0	1	1	1	1	0	0	1	1
1467	Bacteria_Firmicutes_Clostridia_Lachnospirales_Lachnospiraceae_Tyzzerella_NA.29	1	1	1	1	0	1	1	1	1	1	0
1468	Bacteria_Firmicutes_Clostridia_Oscillospirales_Ruminococcaceae_CandidatusSoleaferrea_NA.29	1	1	0	1	1	1	1	1	1	1	0
1469	Bacteria_Desulfobacterota_Desulfovibrionia_Desulfovibrionales_Desulfovibrionaceae_Desulfovibrio_NA.139	0	1	0	1	1	1	1	0	0	0	1
1470	Bacteria_Planctomycetota_Planctomycetes_Pirellulales_Pirellulaceae_Termiteplanctomycetecluster_NA.21	0	0	0	0	1	0	0	0	0	0	1
1471	Bacteria_Firmicutes_Clostridia_Peptostreptococcales.Tissierellales_Anaerovoracaceae_NA_NA.22	1	1	0	1	1	1	1	1	0	1	0
1472	Bacteria_Firmicutes_Clostridia_Peptococcales_Peptococcaceae_NA_NA.23	1	1	0	1	1	1	1	1	1	1	0
1473	Bacteria_Firmicutes_Clostridia_Oscillospirales_Ruminococcaceae_CandidatusSoleaferrea_NA.30	0	1	0	1	1	0	1	1	0	1	0
1474	Bacteria_Firmicutes_Clostridia_Oscillospirales_Ruminococcaceae_CandidatusSoleaferrea_NA.31	0	0	0	1	1	0	1	0	0	0	1
1475	Bacteria_Desulfobacterota_Desulfovibrionia_Desulfovibrionales_Desulfovibrionaceae_Desulfovibrio_NA.140	0	1	0	1	0	0	0	1	0	0	0
1476	Bacteria_Spirochaetota_Spirochaetia_Spirochaetales_Spirochaetaceae_Treponema_NA.8	0	1	0	1	0	0	1	1	1	0	0
1477	Bacteria_Proteobacteria_Alphaproteobacteria_Rhodospirillales_NA_NA_NA.23	1	0	1	0	0	0	0	1	1	1	0
1478	Bacteria_Firmicutes_Clostridia_NA_NA_NA_NA.22	1	0	1	0	1	0	1	1	1	0	1
1479	Bacteria_Firmicutes_Clostridia_Oscillospirales_Ruminococcaceae_NA_NA.101	0	0	0	1	1	0	0	0	1	0	1
1480	Bacteria_Bacteroidota_Bacteroidia_Bacteroidales_Rikenellaceae_Alistipes_NA.52	1	0	0	1	0	0	0	1	1	1	0
1481	Bacteria_Proteobacteria_Alphaproteobacteria_Rhodospirillales_NA_NA_NA.24	1	1	1	1	0	1	1	1	1	1	0
1482	Bacteria_Firmicutes_Clostridia_Oscillospirales_Ruminococcaceae_CandidatusSoleaferrea_NA.32	0	1	0	1	1	0	0	0	0	0	0
1483	Bacteria_Firmicutes_Clostridia_Christensenellales_Christensenellaceae_ChristensenellaceaeR.7group_NA.133	0	0	0	1	1	0	1	1	0	0	1
1484	Bacteria_Bacteroidota_Bacteroidia_Bacteroidales_Rikenellaceae_Alistipes_NA.53	1	0	1	1	0	0	0	1	1	1	1
1485	Bacteria_Firmicutes_Clostridia_Lachnospirales_Lachnospiraceae_Tyzzerella_NA.30	1	1	0	0	0	0	1	1	1	1	0
1486	Bacteria_Proteobacteria_Alphaproteobacteria_Rhodospirillales_NA_NA_NA.25	0	1	0	1	0	1	0	0	0	0	0
1487	Bacteria_Verrucomicrobiota_Verrucomicrobiae_Opitutales_Puniceicoccaceae_Cerasicoccus_NA.1	1	1	1	0	0	1	1	1	1	1	1
1488	Bacteria_Firmicutes_Clostridia_Christensenellales_Christensenellaceae_ChristensenellaceaeR.7group_NA.134	0	0	0	0	1	0	1	1	0	1	1
1489	Bacteria_Firmicutes_Clostridia_Peptostreptococcales.Tissierellales_Anaerovoracaceae_NA_NA.23	1	0	1	0	0	0	0	1	1	1	0
1490	Bacteria_Firmicutes_Clostridia_Christensenellales_Christensenellaceae_ChristensenellaceaeR.7group_NA.135	0	0	0	0	0	0	1	0	0	0	0
1491	Bacteria_Desulfobacterota_Desulfovibrionia_Desulfovibrionales_Desulfovibrionaceae_Desulfovibrio_NA.141	0	1	0	1	1	1	1	1	1	0	0
1492	Bacteria_Proteobacteria_Gammaproteobacteria_Burkholderiales_Burkholderiaceae_Burkholderia.Caballeronia.Paraburkholderia_NA	1	1	1	1	1	1	1	1	1	0	1
1493	Bacteria_Firmicutes_Clostridia_Oscillospirales_Ruminococcaceae_NA_NA.102	0	1	1	1	1	1	0	0	1	0	1
1494	Bacteria_Firmicutes_Clostridia_Christensenellales_Christensenellaceae_ChristensenellaceaeR.7group_NA.136	1	1	0	1	1	1	1	0	1	1	1
1495	Bacteria_Spirochaetota_Spirochaetia_Spirochaetales_Spirochaetaceae_Sediminispirochaeta_NA.5	1	1	1	1	1	1	1	1	1	1	1
1496	Bacteria_Firmicutes_Clostridia_Oscillospirales_Ruminococcaceae_NA_NA.103	0	1	0	1	1	0	0	0	0	0	1
1497	Bacteria_Firmicutes_Negativicutes_Acidaminococcales_Acidaminococcaceae_NA_NA.7	1	0	0	1	0	0	0	1	1	1	0
1498	Bacteria_Firmicutes_Clostridia_Oscillospirales_Ruminococcaceae_NA_NA.104	1	0	1	0	1	0	0	0	1	0	1
1499	Bacteria_Planctomycetota_vadinHA49_NA_NA_NA_NA.28	0	1	0	1	1	1	1	1	1	1	0
1500	Bacteria_Firmicutes_Clostridia_Oscillospirales_Ruminococcaceae_NA_NA.105	1	1	1	1	1	1	1	1	1	1	0
1501	Bacteria_Firmicutes_Bacilli_RF39_NA_NA_NA.26	1	1	0	1	0	1	1	0	1	1	0
1502	Bacteria_Synergistota_Synergistia_Synergistales_Synergistaceae_CandidatusTammella_NA.14	0	0	0	1	0	0	1	1	0	0	0
1503	Bacteria_Desulfobacterota_Desulfovibrionia_Desulfovibrionales_Desulfovibrionaceae_Desulfovibrio_NA.143	0	1	0	1	1	1	1	0	1	0	1
1504	Bacteria_Spirochaetota_Spirochaetia_Spirochaetales_Spirochaetaceae_NA_NA.2	1	1	0	1	1	1	1	0	0	0	1
1505	Bacteria_Firmicutes_Clostridia_Christensenellales_Christensenellaceae_ChristensenellaceaeR.7group_NA.137	0	1	1	1	1	1	1	0	0	1	0
1506	Bacteria_Firmicutes_Clostridia_Oscillospirales_Ruminococcaceae_NA_NA.106	1	0	1	0	0	0	0	1	1	1	0
1507	Bacteria_Firmicutes_Clostridia_Oscillospirales_Oscillospiraceae_NA_NA.18	1	0	0	1	1	0	1	0	1	0	0
1508	Bacteria_Firmicutes_Clostridia_Christensenellales_Christensenellaceae_ChristensenellaceaeR.7group_NA.138	0	0	0	0	0	0	1	0	0	0	0
1509	Bacteria_Desulfobacterota_Desulfovibrionia_Desulfovibrionales_Desulfovibrionaceae_Desulfovibrio_NA.144	1	0	1	0	0	0	1	0	0	0	0
1510	Bacteria_Firmicutes_Clostridia_Oscillospirales_Oscillospiraceae_NA_NA.19	1	0	0	0	0	0	0	1	0	1	0
1511	Bacteria_Firmicutes_Clostridia_Christensenellales_Christensenellaceae_ChristensenellaceaeR.7group_NA.139	0	1	0	0	1	0	1	0	0	0	0
1512	Bacteria_Firmicutes_Clostridia_ClostridiavadinBB60group_NA_NA_NA.22	1	0	1	0	0	1	0	0	1	1	0
1513	Bacteria_Firmicutes_Clostridia_NA_NA_NA_NA.23	1	0	0	0	0	0	1	1	1	0	1
1514	Bacteria_Planctomycetota_vadinHA49_NA_NA_NA_NA.29	0	1	0	1	1	0	0	0	0	0	0
1515	Bacteria_Deferribacterota_Deferribacteres_Deferribacterales_Deferribacteraceae_Mucispirillum_NA.11	0	1	0	1	1	1	1	1	1	0	1
1516	Bacteria_Desulfobacterota_Desulfovibrionia_Desulfovibrionales_Desulfovibrionaceae_Desulfovibrio_NA.145	0	1	0	0	1	1	0	1	1	1	0
1517	Bacteria_Bdellovibrionota_Bdellovibrionia_Bacteriovoracales_Bacteriovoracaceae_Peredibacter_NA.1	0	0	0	1	1	1	0	0	0	0	0
1518	Bacteria_Firmicutes_Clostridia_Oscillospirales_Ruminococcaceae_CandidatusSoleaferrea_NA.33	0	1	0	0	0	1	0	0	0	0	0
1519	Bacteria_Firmicutes_Clostridia_Oscillospirales_Oscillospiraceae_NA_NA.20	1	1	1	1	1	1	1	0	1	0	0
1520	Bacteria_Planctomycetota_vadinHA49_NA_NA_NA_NA.30	0	0	1	1	1	1	1	1	0	1	0
1521	Bacteria_Firmicutes_Clostridia_Oscillospirales_Ruminococcaceae_CandidatusSoleaferrea_NA.34	1	0	1	0	0	0	0	1	1	1	0
1522	Bacteria_Firmicutes_Bacilli_RF39_NA_NA_NA.27	1	1	1	1	1	1	1	1	0	0	0
1523	Bacteria_Planctomycetota_Planctomycetes_Pirellulales_Pirellulaceae_Termiteplanctomycetecluster_NA.22	1	1	1	1	1	1	1	0	1	0	1
1524	Bacteria_Firmicutes_Clostridia_Oscillospirales_Eubacteriumcoprostanoligenesgroup_NA_NA.18	0	1	0	1	1	1	0	0	0	0	0
1525	Bacteria_Firmicutes_Clostridia_Monoglobales_Monoglobaceae_Monoglobus_NA.1	0	0	0	0	0	1	0	0	0	0	0
1526	Bacteria_Proteobacteria_Gammaproteobacteria_Burkholderiales_Nitrosomonadaceae_NA_NA	0	1	1	1	1	1	1	1	1	0	1
1527	Bacteria_Cyanobacteria_Vampirivibrionia_Gastranaerophilales_NA_NA_NA	1	0	1	0	0	0	0	1	1	1	0
1528	Bacteria_Proteobacteria_Gammaproteobacteria_Burkholderiales_Comamonadaceae_Simplicispira_NA	1	0	0	0	0	0	0	1	0	1	0
1529	Bacteria_Planctomycetota_Planctomycetes_Pirellulales_Pirellulaceae_Termiteplanctomycetecluster_NA.23	0	1	0	1	1	1	1	1	0	0	0
1530	Bacteria_Firmicutes_Clostridia_Oscillospirales_Oscillospiraceae_Papillibacter_NA.2	1	0	0	0	0	0	0	1	1	1	0
1531	Bacteria_Firmicutes_Clostridia_Lachnospirales_Lachnospiraceae_Tyzzerella_NA.31	0	1	0	1	1	0	1	1	0	1	0
1532	Bacteria_Bacteroidota_Bacteroidia_Bacteroidales_Marinilabiliaceae_NA_NA.9	1	1	1	0	1	1	1	1	1	1	1
1533	Bacteria_Firmicutes_Clostridia_Peptostreptococcales.Tissierellales_Anaerovoracaceae_NA_NA.24	0	0	0	1	0	0	0	1	0	0	0
1534	Bacteria_Firmicutes_Clostridia_ClostridiavadinBB60group_NA_NA_NA.23	0	1	0	1	1	1	1	0	0	0	1
1535	Bacteria_Firmicutes_Clostridia_Oscillospirales_Eubacteriumcoprostanoligenesgroup_NA_NA.19	1	0	0	0	0	0	0	1	0	1	0
1536	Bacteria_Firmicutes_Bacilli_RF39_NA_NA_NA.28	0	0	0	0	0	0	1	0	0	0	0
1537	Bacteria_Planctomycetota_vadinHA49_NA_NA_NA_NA.31	0	0	0	0	1	0	1	0	0	1	0
1538	Bacteria_Firmicutes_Clostridia_Christensenellales_Christensenellaceae_ChristensenellaceaeR.7group_NA.140	0	1	0	0	1	0	1	0	0	0	1
1539	Bacteria_Firmicutes_Clostridia_NA_NA_NA_NA.24	1	0	0	1	1	0	1	1	0	0	0
1540	Bacteria_Synergistota_Synergistia_Synergistales_Synergistaceae_CandidatusTammella_NA.15	0	0	1	0	0	0	0	1	1	0	0
1541	Bacteria_Proteobacteria_Alphaproteobacteria_Rhodospirillales_NA_NA_NA.26	0	1	0	1	1	1	0	0	0	0	0
1542	Bacteria_Firmicutes_Clostridia_Oscillospirales_Ruminococcaceae_NA_NA.107	0	0	1	0	0	0	0	0	0	0	1
1543	Bacteria_Desulfobacterota_Desulfovibrionia_Desulfovibrionales_Desulfovibrionaceae_Desulfovibrio_NA.147	0	1	0	1	1	1	1	0	0	0	0
1544	Bacteria_Firmicutes_Clostridia_Lachnospirales_Lachnospiraceae_NA_NA.32	0	1	0	1	1	1	1	0	0	0	0
1545	Bacteria_Firmicutes_Clostridia_Peptococcales_Peptococcaceae_NA_NA.24	0	0	0	1	1	0	1	0	1	0	0
1546	Bacteria_Firmicutes_Clostridia_Oscillospirales_Ruminococcaceae_NA_NA.108	0	0	0	1	1	0	0	0	0	0	1
1547	Bacteria_Firmicutes_Bacilli_Lactobacillales_Enterococcaceae_Enterococcus_NA.5	1	0	1	0	0	0	0	0	0	0	0
1548	Bacteria_Elusimicrobiota_Elusimicrobia_Elusimicrobiales_Elusimicrobiaceae_Elusimicrobium_NA.6	1	1	1	1	0	0	0	1	1	0	1
1549	Bacteria_Firmicutes_Clostridia_Oscillospirales_Oscillospiraceae_NA_NA.21	1	0	1	0	0	0	0	0	1	0	0
1550	Bacteria_Firmicutes_Clostridia_Oscillospirales_Ruminococcaceae_NA_NA.109	1	1	1	1	0	1	1	0	0	0	0
1551	Bacteria_Firmicutes_Clostridia_Oscillospirales_Ruminococcaceae_NA_NA.110	1	1	0	1	1	1	0	0	1	1	1
1552	Bacteria_Firmicutes_Clostridia_Christensenellales_Christensenellaceae_ChristensenellaceaeR.7group_NA.141	0	0	0	1	0	0	1	0	0	0	0
1553	Bacteria_Firmicutes_Clostridia_Peptostreptococcales.Tissierellales_Anaerovoracaceae_Amnipila_NA	1	0	1	1	1	0	0	1	0	1	1
1554	Bacteria_Firmicutes_Clostridia_Christensenellales_Christensenellaceae_ChristensenellaceaeR.7group_NA.142	0	1	0	1	1	1	1	0	0	0	1
1555	Bacteria_Firmicutes_Clostridia_Oscillospirales_Ruminococcaceae_NA_NA.111	0	0	0	0	0	0	0	0	0	0	1
1556	Bacteria_Firmicutes_Clostridia_NA_NA_NA_NA.25	0	0	0	0	0	0	0	1	1	1	0
1557	Bacteria_Firmicutes_Clostridia_Christensenellales_Christensenellaceae_ChristensenellaceaeR.7group_NA.143	1	0	1	0	0	0	1	1	1	1	1
1558	Bacteria_Desulfobacterota_Desulfovibrionia_Desulfovibrionales_Desulfovibrionaceae_Desulfovibrio_NA.148	0	0	0	1	0	0	0	0	0	0	0
1559	Bacteria_Firmicutes_Clostridia_Oscillospirales_Oscillospiraceae_Intestinimonas_NA.5	0	1	0	1	1	1	1	1	0	0	0
1560	Bacteria_Actinobacteriota_Coriobacteriia_Coriobacteriales_CoriobacterialesIncertaeSedis_Raoultibacter_NA.9	1	0	0	0	0	0	0	1	1	0	0
1561	Bacteria_Bacteroidota_Bacteroidia_Bacteroidales_Rikenellaceae_M2PB4.61termitegroup_NA	1	0	0	1	0	0	1	1	1	1	0
1562	Bacteria_Patescibacteria_Gracilibacteria_JGI0000069.P22_NA_NA_NA.10	1	1	1	1	0	1	1	1	1	1	0
1563	Bacteria_Firmicutes_Clostridia_ClostridiaUCG.014_NA_NA_NA.15	0	1	0	1	0	0	0	0	0	0	0
1564	Bacteria_Proteobacteria_Alphaproteobacteria_Rhodospirillales_NA_NA_NA.27	0	1	0	1	1	1	1	0	0	0	1
1565	Bacteria_Bacteroidota_Bacteroidia_Bacteroidales_Paludibacteraceae_NA_NA.13	1	1	1	1	1	1	1	1	1	1	0
1566	Bacteria_Firmicutes_Clostridia_Christensenellales_Christensenellaceae_NA_NA.28	0	0	1	1	0	0	0	0	1	0	0
1567	Bacteria_Firmicutes_Clostridia_Christensenellales_Christensenellaceae_ChristensenellaceaeR.7group_NA.144	1	0	1	0	0	0	1	0	1	1	0
1568	Bacteria_Proteobacteria_Alphaproteobacteria_Rhodospirillales_NA_NA_NA.28	1	0	1	0	0	0	0	1	1	1	0
1569	Bacteria_Bacteroidota_Bacteroidia_Bacteroidales_Rikenellaceae_Alistipes_NA.54	0	1	0	1	1	1	1	0	0	0	1
1570	Bacteria_Firmicutes_Clostridia_Christensenellales_Christensenellaceae_ChristensenellaceaeR.7group_NA.145	0	1	0	1	1	1	1	0	1	0	1
1571	Bacteria_Firmicutes_Clostridia_Lachnospirales_Lachnospiraceae_Lachnoclostridium_NA.9	0	0	1	0	0	0	0	0	0	0	0
1572	Bacteria_Firmicutes_Bacilli_Erysipelotrichales_Erysipelatoclostridiaceae_NA_NA.1	1	1	1	1	0	0	1	1	1	1	0
1573	Bacteria_Firmicutes_Bacilli_RF39_NA_NA_NA.29	1	1	0	1	0	1	1	1	0	1	0
1574	Bacteria_Firmicutes_Clostridia_Oscillospirales_Ruminococcaceae_CandidatusSoleaferrea_NA.35	1	0	1	0	0	0	0	1	1	1	0
1575	Bacteria_Bacteroidota_Bacteroidia_Bacteroidales_Rikenellaceae_Alistipes_NA.55	1	0	0	0	1	0	0	1	1	1	1
1576	Bacteria_Firmicutes_Clostridia_Oscillospirales_Ruminococcaceae_CandidatusSoleaferrea_NA.36	1	1	1	1	1	1	0	1	1	1	0
1577	Bacteria_Firmicutes_Clostridia_Lachnospirales_Lachnospiraceae_Tyzzerella_NA.32	0	1	0	1	1	0	1	0	0	0	1
1578	Bacteria_Bacteroidota_Bacteroidia_Bacteroidales_Paludibacteraceae_H1_NA.2	0	1	0	0	0	1	1	0	0	0	1
1579	Bacteria_Firmicutes_Clostridia_Oscillospirales_NA_NA_NA.3	1	1	1	1	1	1	1	1	1	0	0
1580	Bacteria_Bacteroidota_Bacteroidia_Bacteroidales_Rikenellaceae_Alistipes_NA.56	1	0	1	0	0	0	0	1	1	1	0
1581	Bacteria_Firmicutes_Clostridia_Lachnospirales_Lachnospiraceae_Tyzzerella_NA.33	1	1	1	1	0	1	1	1	0	0	0
1582	Bacteria_Firmicutes_Clostridia_Oscillospirales_Ruminococcaceae_NA_NA.113	1	0	1	1	1	0	0	1	0	1	1
1583	Bacteria_Firmicutes_Bacilli_RF39_NA_NA_NA.30	0	1	0	1	1	1	1	1	1	0	0
1584	Bacteria_Firmicutes_Clostridia_Oscillospirales_UCG.010_NA_NA.8	0	1	0	1	1	1	1	0	0	0	1
1585	Bacteria_Firmicutes_Clostridia_Lachnospirales_Lachnospiraceae_NA_NA.33	1	0	1	0	0	0	0	1	1	1	0
1586	Bacteria_Firmicutes_Bacilli_Erysipelotrichales_Erysipelatoclostridiaceae_UCG.004_NA.9	1	0	1	0	0	0	1	1	0	1	0
1587	Bacteria_Bacteroidota_Bacteroidia_Bacteroidales_Tannerellaceae_CandidatusVestibaculum_NA.4	0	0	1	0	0	0	0	1	0	0	0
1588	Bacteria_Firmicutes_Clostridia_Oscillospirales_Oscillospiraceae_NA_NA.22	1	0	0	0	0	0	0	0	1	0	0
1589	Bacteria_Bacteroidota_Bacteroidia_Bacteroidales_Rikenellaceae_Alistipes_NA.57	1	1	1	1	0	1	0	1	1	1	0
1590	Bacteria_Firmicutes_Clostridia_Lachnospirales_Lachnospiraceae_Tyzzerella_NA.34	0	0	0	1	0	0	0	1	0	0	0
1591	Bacteria_Firmicutes_Clostridia_Christensenellales_Christensenellaceae_NA_NA.29	0	1	0	1	1	0	1	1	0	0	1
1592	Bacteria_Firmicutes_Bacilli_RF39_NA_NA_NA.32	1	0	0	1	0	0	0	1	0	0	0
1593	Bacteria_Firmicutes_Clostridia_Peptostreptococcales.Tissierellales_Anaerovoracaceae_NA_NA.25	0	1	1	1	1	1	1	0	0	0	1
1594	Bacteria_Deferribacterota_Deferribacteres_Deferribacterales_Deferribacteraceae_Mucispirillum_NA.12	0	0	0	1	0	0	1	1	1	1	1
1595	Bacteria_Firmicutes_Clostridia_Christensenellales_Christensenellaceae_ChristensenellaceaeR.7group_NA.147	0	0	0	1	1	1	1	0	1	0	0
1596	Bacteria_Firmicutes_Clostridia_Christensenellales_Christensenellaceae_ChristensenellaceaeR.7group_NA.148	0	0	0	1	1	1	1	0	1	0	1
1597	Bacteria_Firmicutes_Clostridia_Oscillospirales_Butyricicoccaceae_UCG.009_NA.14	0	1	0	1	1	1	1	0	0	0	1
1598	Bacteria_Firmicutes_Bacilli_RF39_NA_NA_NA.33	1	0	0	1	0	0	0	1	1	1	0
1599	Bacteria_Firmicutes_Clostridia_Peptococcales_Peptococcaceae_NA_NA.25	1	1	1	1	1	1	1	1	1	1	1
1600	Bacteria_Firmicutes_Clostridia_Oscillospirales_Butyricicoccaceae_UCG.009_NA.15	1	1	0	1	1	1	1	0	1	0	1
1601	Bacteria_Bacteroidota_Bacteroidia_Bacteroidales_Marinifilaceae_Sanguibacteroides_NA.6	1	1	1	0	1	0	1	0	1	0	0
1602	Bacteria_Synergistota_Synergistia_Synergistales_Synergistaceae_CandidatusTammella_NA.16	0	0	0	1	0	0	0	0	1	0	0
1603	Bacteria_Firmicutes_Clostridia_Oscillospirales_Ruminococcaceae_CandidatusSoleaferrea_NA.37	0	1	0	1	1	1	1	0	0	0	0
1604	Bacteria_Firmicutes_Bacilli_Erysipelotrichales_Erysipelotrichaceae_Breznakia_NA.4	0	1	0	0	0	0	1	0	0	0	0
1605	Bacteria_Firmicutes_Clostridia_NA_NA_NA_NA.26	1	1	1	1	1	1	1	1	1	1	0
1606	Bacteria_Firmicutes_Bacilli_Acholeplasmatales_Acholeplasmataceae_Acholeplasma_NA.14	0	0	1	0	0	0	0	1	0	0	0
1607	Bacteria_Firmicutes_Clostridia_Peptostreptococcales.Tissierellales_Anaerovoracaceae_NA_NA.26	1	1	1	1	1	1	1	1	1	1	1
1608	Bacteria_Firmicutes_Clostridia_Oscillospirales_NA_NA_NA.4	1	1	1	1	1	1	1	1	1	1	0
1609	Bacteria_Firmicutes_Clostridia_Christensenellales_Christensenellaceae_ChristensenellaceaeR.7group_NA.149	0	0	0	1	1	0	1	1	1	0	1
1610	Bacteria_Firmicutes_Bacilli_RF39_NA_NA_NA.34	1	1	1	1	1	1	0	1	1	0	0
1611	Bacteria_Firmicutes_Clostridia_ClostridiavadinBB60group_NA_NA_NA.24	0	1	0	1	0	1	1	0	0	0	0
1612	Bacteria_Firmicutes_Clostridia_ClostridiaUCG.014_NA_NA_NA.16	1	0	0	0	0	0	1	1	1	1	0
1613	Bacteria_Firmicutes_Bacilli_Acholeplasmatales_Acholeplasmataceae_Acholeplasma_NA.15	1	0	0	0	0	0	0	1	0	1	0
1614	Bacteria_Firmicutes_Clostridia_Oscillospirales_Eubacteriumcoprostanoligenesgroup_NA_NA.20	0	1	1	1	1	1	1	1	1	0	1
1615	Bacteria_Firmicutes_Clostridia_ClostridiavadinBB60group_NA_NA_NA.25	1	0	0	0	0	0	1	1	1	1	0
1616	Bacteria_Proteobacteria_Alphaproteobacteria_Rhodospirillales_NA_NA_NA.29	0	0	0	0	0	0	0	1	1	0	0
1617	Bacteria_Desulfobacterota_Desulfovibrionia_Desulfovibrionales_Desulfovibrionaceae_Desulfovibrio_NA.150	1	1	0	1	0	0	0	1	1	1	1
1618	Bacteria_Bacteroidota_Bacteroidia_Bacteroidales_Tannerellaceae_NA_NA.11	0	0	0	1	1	0	0	0	1	1	0
1619	Bacteria_Firmicutes_Clostridia_ClostridiavadinBB60group_NA_NA_NA.26	1	1	0	1	0	0	1	1	1	1	0
1620	Bacteria_Spirochaetota_Spirochaetia_Spirochaetales_Spirochaetaceae_Treponema_NA.9	1	1	0	0	1	0	0	1	1	0	0
1621	Bacteria_Firmicutes_Clostridia_Christensenellales_Christensenellaceae_NA_NA.30	0	0	1	0	0	0	0	1	1	0	0
1622	Bacteria_Firmicutes_Bacilli_Acholeplasmatales_Acholeplasmataceae_Acholeplasma_NA.16	0	1	0	1	1	1	1	0	0	0	0
1623	Bacteria_Firmicutes_Clostridia_Oscillospirales_Ruminococcaceae_NA_NA.114	1	0	0	0	1	0	0	1	1	1	0
1624	Bacteria_Elusimicrobiota_Endomicrobia_Endomicrobiales_Endomicrobiaceae_Endomicrobium_NA.6	0	1	0	1	0	1	1	0	0	0	0
1625	Bacteria_Planctomycetota_vadinHA49_NA_NA_NA_NA.32	0	0	0	0	0	0	1	0	0	1	1
1626	Bacteria_Firmicutes_Clostridia_Oscillospirales_Ruminococcaceae_NA_NA.115	0	0	1	0	1	1	0	1	0	0	1
1627	Bacteria_Planctomycetota_vadinHA49_NA_NA_NA_NA.33	0	0	0	0	1	1	0	0	0	0	1
1628	Bacteria_Firmicutes_Clostridia_Oscillospirales_Ruminococcaceae_NA_NA.116	1	0	0	0	1	0	1	1	0	0	0
1629	Bacteria_Firmicutes_Clostridia_NA_NA_NA_NA.27	0	1	1	1	1	1	0	0	1	1	1
1630	Bacteria_Firmicutes_Clostridia_Christensenellales_Christensenellaceae_ChristensenellaceaeR.7group_NA.150	1	1	1	1	1	1	1	0	0	0	0
1631	Bacteria_Firmicutes_Clostridia_Oscillospirales_Ruminococcaceae_NA_NA.117	0	1	0	1	1	1	1	0	0	0	0
1632	Bacteria_Firmicutes_Clostridia_NA_NA_NA_NA.28	0	0	1	1	1	1	1	0	1	0	0
1633	Bacteria_Firmicutes_Clostridia_Christensenellales_Christensenellaceae_ChristensenellaceaeR.7group_NA.151	0	1	0	0	0	0	0	0	0	0	0
1634	Bacteria_Proteobacteria_Alphaproteobacteria_Rhodospirillales_NA_NA_NA.30	1	1	1	1	0	0	0	0	1	1	0
1635	Bacteria_Firmicutes_Clostridia_Christensenellales_Christensenellaceae_NA_NA.31	0	0	0	0	1	0	1	0	0	0	1
1636	Bacteria_Firmicutes_Clostridia_Lachnospirales_Lachnospiraceae_LachnospiraceaeUCG.010_NA.2	1	0	1	0	0	0	0	1	1	1	0
1637	Bacteria_Firmicutes_Clostridia_Christensenellales_Christensenellaceae_NA_NA.32	0	0	0	1	1	0	0	0	0	0	1
1638	Bacteria_Firmicutes_Clostridia_Oscillospirales_Ruminococcaceae_CandidatusSoleaferrea_NA.38	0	0	0	0	1	0	0	1	0	0	0
1639	Bacteria_Bacteroidota_Bacteroidia_Bacteroidales_Rikenellaceae_Alistipes_NA.59	0	0	1	0	1	0	1	1	1	1	0
1640	Bacteria_Proteobacteria_Alphaproteobacteria_Rhodospirillales_NA_NA_NA.31	0	1	0	1	0	1	0	0	0	0	1
1641	Bacteria_Firmicutes_Bacilli_Lactobacillales_Leuconostocaceae_Leuconostoc_NA	0	1	0	1	1	1	0	0	0	0	1
1642	Bacteria_Desulfobacterota_Desulfovibrionia_Desulfovibrionales_Desulfovibrionaceae_Desulfovibrio_NA.151	0	1	0	1	1	0	1	0	0	0	0
1643	Bacteria_Firmicutes_Clostridia_Oscillospirales_Eubacteriumcoprostanoligenesgroup_NA_NA.21	0	0	1	0	1	0	0	0	1	0	1
1644	Bacteria_Firmicutes_Bacilli_RF39_NA_NA_NA.35	1	0	0	0	0	0	1	1	0	1	0
1645	Bacteria_Firmicutes_Clostridia_Oscillospirales_Ruminococcaceae_NA_NA.118	1	0	0	0	1	0	1	0	0	1	0
1646	Bacteria_Firmicutes_Clostridia_Christensenellales_Christensenellaceae_ChristensenellaceaeR.7group_NA.152	0	0	1	0	0	0	0	0	1	1	0
1647	Bacteria_Firmicutes_Clostridia_NA_NA_NA_NA.29	0	1	1	1	0	1	1	1	1	0	0
1648	Bacteria_Firmicutes_Clostridia_Oscillospirales_Ruminococcaceae_NA_NA.119	1	0	1	1	1	0	0	0	1	0	1
1649	Bacteria_Firmicutes_Bacilli_RsaHf231_NA_NA_NA.4	1	1	1	1	1	1	1	1	1	0	1
1650	Bacteria_Firmicutes_Clostridia_Oscillospirales_Ruminococcaceae_NA_NA.120	0	0	0	0	1	0	0	0	0	0	1
1651	Bacteria_Firmicutes_Clostridia_Oscillospirales_Oscillospiraceae_Intestinimonas_NA.7	1	0	0	0	0	0	0	1	1	1	0
1652	Bacteria_Firmicutes_Clostridia_Oscillospirales_Hydrogenoanaerobacterium_NA_NA.4	1	1	1	1	1	1	1	1	1	1	0
1653	Bacteria_Desulfobacterota_Desulfovibrionia_Desulfovibrionales_Desulfovibrionaceae_Desulfovibrio_NA.152	0	0	1	1	0	0	1	1	1	1	0
1654	Bacteria_Planctomycetota_Planctomycetes_Pirellulales_Pirellulaceae_Termiteplanctomycetecluster_NA.24	0	0	0	1	1	0	1	0	0	0	1
1655	Bacteria_Firmicutes_Clostridia_Lachnospirales_Lachnospiraceae_NA_NA.34	0	0	0	0	1	0	1	1	1	0	0
1656	Bacteria_Firmicutes_Clostridia_Oscillospirales_Eubacteriumcoprostanoligenesgroup_NA_NA.22	1	1	1	1	1	1	1	0	1	0	0
1657	Bacteria_Firmicutes_Clostridia_ClostridiavadinBB60group_NA_NA_NA.27	0	1	1	1	0	1	1	1	1	1	0
1658	Bacteria_Firmicutes_Bacilli_RF39_NA_NA_NA.37	0	1	1	1	1	1	0	1	1	1	0
1659	Bacteria_Firmicutes_Clostridia_Christensenellales_Christensenellaceae_NA_NA.33	1	1	1	1	0	0	0	0	1	0	0
1660	Bacteria_Firmicutes_Clostridia_Oscillospirales_Butyricicoccaceae_UCG.009_NA.16	1	1	0	1	1	1	1	1	0	0	0
1661	Bacteria_Firmicutes_Clostridia_NA_NA_NA_NA.30	0	1	0	0	0	0	1	0	0	1	0
1662	Bacteria_Firmicutes_Clostridia_Oscillospirales_Oscillospiraceae_NA_NA.23	0	0	1	0	0	0	0	0	1	0	1
1663	Bacteria_Firmicutes_Bacilli_RF39_NA_NA_NA.38	0	0	0	1	0	0	0	1	1	1	0
1664	Bacteria_Desulfobacterota_Desulfovibrionia_Desulfovibrionales_Desulfovibrionaceae_Desulfovibrio_NA.154	1	1	1	0	1	0	1	1	1	0	0
1665	Bacteria_Firmicutes_Clostridia_ClostridiaUCG.014_NA_NA_NA.17	0	0	0	0	0	0	1	0	0	0	0
1666	Bacteria_Bacteroidota_Bacteroidia_Bacteroidales_PeH15_NA_NA.3	1	0	0	0	0	0	0	1	0	0	0
1667	Bacteria_Planctomycetota_vadinHA49_NA_NA_NA_NA.34	1	1	1	1	1	0	1	0	1	0	0
1668	Bacteria_Firmicutes_Clostridia_ClostridiaUCG.014_NA_NA_NA.18	0	0	0	0	0	0	1	0	0	0	0
1669	Bacteria_Firmicutes_Clostridia_Oscillospirales_Ruminococcaceae_NA_NA.122	1	0	0	0	1	0	0	1	1	1	1
1670	Bacteria_Firmicutes_Clostridia_Christensenellales_Christensenellaceae_ChristensenellaceaeR.7group_NA.153	1	0	1	0	0	0	0	1	0	0	0
1671	Bacteria_Firmicutes_NA_NA_NA_NA_NA.10	0	1	0	1	1	1	1	0	0	0	0
1672	Bacteria_Firmicutes_Clostridia_Oscillospirales_Ruminococcaceae_CandidatusSoleaferrea_NA.39	0	0	0	0	0	0	0	1	1	1	0
1673	Bacteria_Firmicutes_Clostridia_Oscillospirales_Ruminococcaceae_Paludicola_NA.1	1	0	1	1	1	0	0	0	1	1	0
1674	Bacteria_Firmicutes_Bacilli_RF39_NA_NA_NA.39	1	1	1	1	0	1	1	1	1	1	0
1675	Bacteria_Firmicutes_Clostridia_NA_NA_NA_NA.31	1	1	1	1	1	1	1	1	1	1	1
1676	Bacteria_Proteobacteria_Alphaproteobacteria_Rhodospirillales_NA_NA_NA.32	1	0	1	1	0	0	0	1	1	1	0
1677	Bacteria_Desulfobacterota_Desulfovibrionia_Desulfovibrionales_Desulfovibrionaceae_Desulfovibrio_NA.155	1	0	0	0	1	1	1	1	0	0	1
1678	Bacteria_Spirochaetota_Spirochaetia_Spirochaetales_Spirochaetaceae_Treponema_NA.10	1	0	1	0	0	0	1	1	1	0	1
1679	Bacteria_Firmicutes_Clostridia_Oscillospirales_Ruminococcaceae_NA_NA.123	0	1	0	1	1	1	0	0	0	0	0
1680	Bacteria_Firmicutes_Clostridia_Christensenellales_Christensenellaceae_NA_NA.34	0	0	1	0	0	0	0	1	0	0	1
1681	Bacteria_Proteobacteria_Alphaproteobacteria_Rhodospirillales_NA_NA_NA.33	1	0	1	0	0	0	0	1	1	1	0
1682	Bacteria_Patescibacteria_Gracilibacteria_JGI0000069.P22_NA_NA_NA.11	1	1	1	1	0	0	0	1	1	1	0
1683	Bacteria_Firmicutes_Clostridia_Christensenellales_Christensenellaceae_ChristensenellaceaeR.7group_NA.154	0	1	0	1	1	1	1	0	0	0	1
1684	Bacteria_Planctomycetota_vadinHA49_NA_NA_NA_NA.35	0	0	1	1	0	0	0	0	1	1	0
1685	Bacteria_Desulfobacterota_Desulfovibrionia_Desulfovibrionales_Desulfovibrionaceae_Desulfovibrio_NA.156	0	0	0	0	0	0	1	0	0	0	0
1686	Bacteria_Bacteroidota_Bacteroidia_Bacteroidales_Rikenellaceae_Alistipes_NA.60	1	0	0	0	0	0	0	0	0	0	0
1687	Bacteria_Firmicutes_Clostridia_Lachnospirales_Lachnospiraceae_Tyzzerella_NA.35	1	1	0	1	1	1	1	0	0	1	0
1688	Bacteria_Planctomycetota_Planctomycetes_Pirellulales_Pirellulaceae_Termiteplanctomycetecluster_NA.25	0	0	0	1	0	0	1	0	0	0	1
1689	Bacteria_Desulfobacterota_Desulfovibrionia_Desulfovibrionales_Desulfovibrionaceae_NA_NA.13	0	1	0	0	1	0	1	0	0	0	1
1690	Bacteria_Bacteroidota_Bacteroidia_Bacteroidales_Dysgonomonadaceae_CandidatusSymbiothrix_NA.6	0	0	0	1	0	0	0	0	0	0	0
1691	Bacteria_Firmicutes_Bacilli_RF39_NA_NA_NA.40	1	0	0	0	1	0	1	1	1	1	0
1692	Bacteria_Firmicutes_Bacilli_RF39_NA_NA_NA.41	0	0	1	0	0	0	0	1	1	0	1
1693	Bacteria_Firmicutes_Clostridia_Christensenellales_Christensenellaceae_ChristensenellaceaeR.7group_NA.155	1	1	0	0	1	0	1	0	0	0	1
1694	Bacteria_Verrucomicrobiota_Kiritimatiellae_WCHB1.41_NA_NA_NA.4	0	0	0	1	1	0	1	0	0	0	0
1695	Bacteria_Firmicutes_Clostridia_Lachnospirales_Lachnospiraceae_Tyzzerella_NA.36	1	0	1	1	1	0	0	1	1	1	0
1696	Bacteria_Firmicutes_Clostridia_Christensenellales_Christensenellaceae_NA_NA.35	1	0	1	0	1	0	1	0	0	0	0
1697	Bacteria_Bacteroidota_Bacteroidia_Bacteroidales_Rikenellaceae_Alistipes_NA.61	0	1	1	1	1	1	1	0	1	1	1
1698	Bacteria_Bacteroidota_Bacteroidia_Bacteroidales_Rikenellaceae_Alistipes_NA.62	0	1	0	1	1	0	1	0	0	0	1
1699	Bacteria_Firmicutes_Clostridia_Christensenellales_Christensenellaceae_NA_NA.36	1	1	0	1	1	1	1	1	0	1	0
1700	Bacteria_Bacteroidota_Bacteroidia_Bacteroidales_Dysgonomonadaceae_Dysgonomonas_NA.35	0	0	1	0	0	1	0	0	1	1	0
1701	Bacteria_Firmicutes_Bacilli_RF39_NA_NA_NA.42	1	0	0	0	0	0	0	1	1	1	0
1702	Bacteria_Firmicutes_Clostridia_Christensenellales_Christensenellaceae_ChristensenellaceaeR.7group_NA.156	1	0	1	0	0	0	0	0	1	1	0
1703	Bacteria_Firmicutes_Clostridia_ClostridiavadinBB60group_NA_NA_NA.28	1	1	0	1	0	1	1	1	1	1	0
1704	Bacteria_Firmicutes_Clostridia_ClostridiaUCG.014_NA_NA_NA.20	1	0	1	0	0	1	1	1	1	0	1
1705	Bacteria_Firmicutes_Clostridia_Christensenellales_Christensenellaceae_NA_NA.37	0	0	0	0	1	0	1	0	0	0	1
1706	Bacteria_Bdellovibrionota_Oligoflexia_Oligoflexales_NA_NA_NA	0	1	0	0	1	1	1	0	1	0	1
1707	Bacteria_Firmicutes_Clostridia_Oscillospirales_NA_NA_NA.5	0	0	0	0	1	1	0	0	0	0	0
1708	Bacteria_Bacteroidota_Bacteroidia_Bacteroidales_Tannerellaceae_Parabacteroides_NA.31	1	0	0	0	0	0	0	0	0	0	0
1709	Bacteria_Proteobacteria_Gammaproteobacteria_Burkholderiales_Rhodocyclaceae_NA_NA	0	1	0	1	1	1	1	0	1	0	1
1710	Bacteria_Firmicutes_Clostridia_Christensenellales_Christensenellaceae_ChristensenellaceaeR.7group_NA.157	0	0	0	1	1	1	1	1	0	0	1
1711	Bacteria_Bacteroidota_Bacteroidia_Bacteroidales_NA_NA_NA.11	0	0	0	0	0	0	1	0	1	1	0
1712	Bacteria_Firmicutes_Clostridia_Oscillospirales_Oscillospiraceae_NK4A214group_NA.8	0	0	0	1	1	0	0	1	1	0	0
1713	Bacteria_Elusimicrobiota_Elusimicrobia_Elusimicrobiales_Elusimicrobiaceae_Elusimicrobium_NA.7	1	1	1	1	1	1	0	1	0	1	0
1714	Bacteria_Firmicutes_Clostridia_Oscillospirales_Ruminococcaceae_NA_NA.124	0	0	0	1	1	0	1	0	0	0	1
1715	Bacteria_Firmicutes_Clostridia_Peptostreptococcales.Tissierellales_Anaerovoracaceae_NA_NA.27	1	0	0	1	0	0	1	1	0	0	0
1716	Bacteria_Firmicutes_Bacilli_RF39_NA_NA_NA.43	1	1	0	1	1	1	1	0	1	0	0
1717	Bacteria_Firmicutes_Clostridia_ClostridiaUCG.014_NA_NA_NA.21	1	0	1	1	1	0	1	1	1	0	1
1718	Bacteria_Firmicutes_Clostridia_Oscillospirales_Butyricicoccaceae_UCG.009_NA.17	0	0	0	0	0	0	0	1	0	0	0
1719	Bacteria_Firmicutes_Clostridia_Lachnospirales_Lachnospiraceae_Tyzzerella_NA.37	0	0	0	1	1	0	1	0	0	0	1
1720	Bacteria_Firmicutes_Clostridia_Oscillospirales_Ruminococcaceae_NA_NA.125	0	0	1	1	0	0	0	0	1	0	1
1721	Bacteria_Firmicutes_Clostridia_Oscillospirales_Oscillospiraceae_NA_NA.24	0	1	1	1	1	0	1	1	1	0	0
1722	Bacteria_Firmicutes_Clostridia_Oscillospirales_Butyricicoccaceae_UCG.009_NA.18	1	1	0	1	1	1	0	1	0	0	0
1723	Bacteria_NA_NA_NA_NA_NA_NA.5	1	1	0	1	0	1	0	1	1	1	0
1724	Bacteria_Desulfobacterota_Desulfovibrionia_Desulfovibrionales_Desulfovibrionaceae_Desulfovibrio_NA.157	0	0	0	1	1	0	1	1	0	0	1
1725	Bacteria_Firmicutes_Clostridia_ClostridiaUCG.014_NA_NA_NA.22	0	1	0	1	0	1	1	0	0	0	0
1726	Bacteria_Firmicutes_Clostridia_Christensenellales_Christensenellaceae_NA_NA.38	0	0	0	1	1	0	1	0	0	0	0
1727	Bacteria_Firmicutes_Clostridia_Christensenellales_Christensenellaceae_ChristensenellaceaeR.7group_NA.158	0	0	0	0	1	0	1	1	1	0	0
1728	Bacteria_Bacteroidota_Bacteroidia_Bacteroidales_Tannerellaceae_NA_NA.12	0	0	0	1	0	0	0	0	0	0	0
1729	Bacteria_Firmicutes_Clostridia_NA_NA_NA_NA.32	0	0	1	1	1	0	1	0	1	0	1
1730	Bacteria_Firmicutes_Clostridia_Christensenellales_Christensenellaceae_NA_NA.39	1	1	0	1	1	1	1	1	0	1	0
1731	Bacteria_Firmicutes_Clostridia_Christensenellales_Christensenellaceae_NA_NA.40	0	0	0	1	1	0	0	1	0	1	1
1732	Bacteria_Desulfobacterota_Desulfovibrionia_Desulfovibrionales_Desulfovibrionaceae_Desulfovibrio_NA.158	0	0	1	0	0	0	0	0	0	0	0
1733	Bacteria_Patescibacteria_Gracilibacteria_JGI0000069.P22_NA_NA_NA.12	1	1	0	1	0	0	1	1	1	0	0
1734	Bacteria_Firmicutes_Clostridia_Oscillospirales_Ruminococcaceae_NA_NA.126	1	1	1	1	1	1	0	0	1	0	0
1735	Bacteria_Firmicutes_Clostridia_Oscillospirales_Ruminococcaceae_CandidatusSoleaferrea_NA.41	1	0	1	1	1	0	0	1	0	0	0
1736	Bacteria_Firmicutes_Clostridia_Peptostreptococcales.Tissierellales_Anaerovoracaceae_NA_NA.28	0	0	0	0	1	0	1	0	0	0	0
1737	Bacteria_Cyanobacteria_Vampirivibrionia_Gastranaerophilales_NA_NA_NA.1	1	1	0	1	1	1	1	1	0	1	0
1738	Bacteria_Firmicutes_Clostridia_Oscillospirales_UCG.010_NA_NA.9	0	0	1	0	0	0	1	0	1	1	0
1739	Bacteria_Firmicutes_Bacilli_RF39_NA_NA_NA.44	1	1	1	1	1	0	0	0	1	0	0
1740	Bacteria_Planctomycetota_vadinHA49_NA_NA_NA_NA.36	0	0	0	0	0	0	0	0	0	0	1
1741	Bacteria_Firmicutes_Clostridia_Christensenellales_Christensenellaceae_ChristensenellaceaeR.7group_NA.159	1	0	0	0	0	0	0	1	1	0	0
1742	Bacteria_Proteobacteria_Alphaproteobacteria_Rhodospirillales_NA_NA_NA.34	0	0	0	0	0	0	1	0	0	0	0
1743	Bacteria_Firmicutes_Clostridia_NA_NA_NA_NA.33	1	0	0	0	1	0	0	0	0	1	0
1744	Bacteria_Firmicutes_Clostridia_Christensenellales_Christensenellaceae_ChristensenellaceaeR.7group_NA.160	1	0	1	0	0	0	0	0	0	0	0
1745	Bacteria_Firmicutes_Clostridia_ClostridiaUCG.014_NA_NA_NA.23	0	0	0	1	0	0	1	1	0	0	0
1746	Bacteria_Firmicutes_Clostridia_Oscillospirales_Oscillospiraceae_NK4A214group_NA.9	1	1	0	1	1	0	0	0	1	0	0
1747	Bacteria_Planctomycetota_vadinHA49_NA_NA_NA_NA.37	0	1	0	1	0	1	1	0	0	0	0
1748	Bacteria_Firmicutes_Clostridia_Lachnospirales_Lachnospiraceae_NA_NA.35	1	1	0	0	1	0	0	0	0	0	0
1749	Bacteria_Planctomycetota_vadinHA49_NA_NA_NA_NA.38	0	0	1	1	0	0	0	1	0	0	0
1750	Bacteria_Firmicutes_Clostridia_Christensenellales_Christensenellaceae_NA_NA.41	1	0	1	1	1	0	1	1	0	1	0
1751	Bacteria_Firmicutes_Clostridia_Oscillospirales_Ruminococcaceae_NA_NA.127	1	0	0	1	1	0	1	0	1	0	1
1752	Bacteria_Patescibacteria_Gracilibacteria_JGI0000069.P22_NA_NA_NA.13	1	0	0	0	0	0	1	0	1	1	0
1753	Bacteria_Firmicutes_Clostridia_Oscillospirales_NA_NA_NA.6	1	0	0	1	1	0	0	1	1	0	0
1754	Bacteria_Bacteroidota_Bacteroidia_Bacteroidales_MgMjR.022_NA_NA.1	1	1	1	0	0	0	0	1	1	0	0
1755	Bacteria_Firmicutes_Clostridia_Christensenellales_Christensenellaceae_ChristensenellaceaeR.7group_NA.161	0	0	1	0	1	0	1	0	0	0	0
1756	Bacteria_Desulfobacterota_Desulfovibrionia_Desulfovibrionales_Desulfovibrionaceae_Desulfovibrio_NA.159	1	1	0	1	1	1	1	0	1	0	0
1757	Bacteria_Elusimicrobiota_Elusimicrobia_Elusimicrobiales_Elusimicrobiaceae_Elusimicrobium_minutum	0	1	0	1	1	0	0	0	0	0	0
1758	Bacteria_Proteobacteria_Alphaproteobacteria_NA_NA_NA_NA.6	1	1	1	1	1	1	1	0	0	1	1
1759	Bacteria_Desulfobacterota_Desulfovibrionia_Desulfovibrionales_Desulfovibrionaceae_Desulfovibrio_NA.160	1	1	0	1	1	1	0	1	0	0	0
1760	Bacteria_Firmicutes_Clostridia_Christensenellales_Christensenellaceae_ChristensenellaceaeR.7group_NA.162	1	0	1	0	0	0	0	1	1	1	0
1761	Bacteria_Firmicutes_Clostridia_Christensenellales_Christensenellaceae_ChristensenellaceaeR.7group_NA.163	0	0	0	0	0	0	0	1	0	0	0
1762	Bacteria_Bacteroidota_Bacteroidia_Bacteroidales_Paludibacteraceae_NA_NA.14	1	1	0	1	1	1	1	1	1	1	0
1763	Bacteria_Firmicutes_Bacilli_Lactobacillales_Lactobacillaceae_Lactobacillus_NA.7	1	0	0	0	0	0	0	0	0	0	1
1764	Bacteria_Firmicutes_Clostridia_Oscillospirales_Ruminococcaceae_NA_NA.128	0	1	0	1	1	1	0	1	1	0	0
1765	Bacteria_Firmicutes_Clostridia_Oscillospirales_Butyricicoccaceae_UCG.009_NA.19	0	0	0	1	1	0	1	1	0	0	0
1766	Bacteria_Bacteroidota_Bacteroidia_Bacteroidales_M2PB4.65termitegroup_NA_NA.11	1	0	0	0	1	1	1	0	0	0	1
1767	Bacteria_Bacteroidota_Bacteroidia_Bacteroidales_Paludibacteraceae_NA_NA.15	1	1	1	1	1	1	1	1	1	1	1
1768	Bacteria_Desulfobacterota_Desulfovibrionia_Desulfovibrionales_Desulfovibrionaceae_Desulfovibrio_NA.161	1	1	0	1	1	0	0	0	1	1	0
1769	Bacteria_Firmicutes_Clostridia_Oscillospirales_UCG.010_NA_NA.10	1	0	0	1	1	0	0	0	0	0	0
1770	Bacteria_Firmicutes_Clostridia_Christensenellales_Christensenellaceae_NA_NA.42	0	0	0	1	0	0	1	0	0	0	0
1771	Bacteria_Firmicutes_Bacilli_RF39_NA_NA_NA.45	0	1	0	1	1	1	1	0	0	0	0
1772	Bacteria_Bacteroidota_Bacteroidia_Bacteroidales_Dysgonomonadaceae_NA_NA.35	0	0	1	0	0	0	0	0	0	1	0
1773	Bacteria_Firmicutes_Clostridia_Lachnospirales_Lachnospiraceae_Tyzzerella_NA.38	0	0	0	0	0	0	0	1	0	0	0
1774	Bacteria_Firmicutes_Clostridia_Oscillospirales_Ruminococcaceae_NA_NA.129	0	0	1	0	0	0	1	0	0	0	1
1775	Bacteria_Elusimicrobiota_Elusimicrobia_Elusimicrobiales_Elusimicrobiaceae_Elusimicrobium_NA.8	1	1	0	1	0	1	1	1	1	1	0
1776	Bacteria_Planctomycetota_vadinHA49_NA_NA_NA_NA.39	0	0	0	0	1	0	1	0	0	0	0
1777	Bacteria_Desulfobacterota_Desulfovibrionia_Desulfovibrionales_Desulfovibrionaceae_Desulfovibrio_NA.162	0	1	0	1	0	1	1	0	0	0	1
1778	Bacteria_Bacteroidota_Bacteroidia_Bacteroidales_Rikenellaceae_Alistipes_NA.63	1	1	0	1	0	0	1	1	1	1	0
1779	Bacteria_Firmicutes_Clostridia_Oscillospirales_Oscillospiraceae_NA_NA.25	0	0	0	0	1	0	0	0	0	0	0
1780	Bacteria_Firmicutes_Bacilli_RF39_NA_NA_NA.47	1	1	1	1	1	1	1	0	0	1	0
1781	Bacteria_Firmicutes_Bacilli_Erysipelotrichales_Erysipelatoclostridiaceae_UCG.004_NA.10	1	0	1	0	0	0	0	0	0	1	0
1782	Bacteria_Firmicutes_Clostridia_Oscillospirales_Eubacteriumcoprostanoligenesgroup_NA_NA.23	0	1	0	1	1	1	1	0	0	0	1
1783	Bacteria_Firmicutes_Clostridia_Oscillospirales_Ruminococcaceae_CandidatusSoleaferrea_NA.42	0	1	1	1	0	1	0	0	1	0	1
1784	Bacteria_Proteobacteria_Gammaproteobacteria_Burkholderiales_Burkholderiaceae_Ralstonia_NA	0	1	0	1	1	1	0	0	0	0	1
1785	Bacteria_Firmicutes_Clostridia_Monoglobales_Monoglobaceae_Monoglobus_NA.2	0	0	0	0	0	0	1	0	0	0	0
1786	Bacteria_Firmicutes_Clostridia_Oscillospirales_Ruminococcaceae_IncertaeSedis_NA.8	0	1	1	1	1	1	1	1	0	0	1
1787	Bacteria_Firmicutes_Clostridia_Oscillospirales_NA_NA_NA.7	0	1	1	0	1	1	0	0	0	0	1
1788	Bacteria_Proteobacteria_Alphaproteobacteria_Rhodospirillales_NA_NA_NA.35	1	0	0	0	0	1	0	1	1	1	0
1789	Bacteria_Proteobacteria_Alphaproteobacteria_Rhodospirillales_NA_NA_NA.36	0	0	0	0	0	0	0	1	1	1	0
1790	Bacteria_Planctomycetota_vadinHA49_NA_NA_NA_NA.40	0	1	0	1	1	0	1	0	1	0	0
1791	Bacteria_Bacteroidota_Bacteroidia_Bacteroidales_Rikenellaceae_Alistipes_NA.64	0	1	0	1	1	1	1	0	0	0	0
1792	Bacteria_Firmicutes_Clostridia_Oscillospirales_Ruminococcaceae_CandidatusSoleaferrea_NA.43	1	1	0	1	1	1	0	1	1	0	0
1793	Bacteria_Desulfobacterota_Desulfovibrionia_Desulfovibrionales_Desulfovibrionaceae_Desulfovibrio_NA.163	0	1	0	1	1	1	1	0	1	1	0
1794	Bacteria_Desulfobacterota_Desulfovibrionia_Desulfovibrionales_Desulfovibrionaceae_Desulfovibrio_NA.164	0	1	0	1	1	0	1	1	0	0	0
1795	Bacteria_Firmicutes_Clostridia_Christensenellales_Christensenellaceae_ChristensenellaceaeR.7group_NA.164	0	0	0	0	0	0	1	0	1	0	0
1796	Bacteria_Firmicutes_Clostridia_Oscillospirales_NA_NA_NA.8	1	0	1	0	1	0	1	1	0	0	0
1797	Bacteria_Firmicutes_Clostridia_ClostridiaUCG.014_NA_NA_NA.24	1	0	1	0	0	0	0	1	1	0	0
1798	Bacteria_Firmicutes_Bacilli_Lactobacillales_Enterococcaceae_Enterococcus_NA.6	0	0	0	0	0	0	0	0	0	1	0
1799	Bacteria_Firmicutes_Clostridia_Lachnospirales_Lachnospiraceae_NA_NA.36	0	1	0	1	0	1	0	0	0	0	0
1800	Bacteria_Bacteroidota_Bacteroidia_Bacteroidales_Rikenellaceae_Alistipes_NA.65	0	0	0	0	0	0	1	0	0	0	0
1801	Bacteria_Firmicutes_Clostridia_Peptostreptococcales.Tissierellales_Anaerovoracaceae_Anaerovorax_NA.3	1	0	0	1	1	1	1	0	1	0	0
1802	Bacteria_Firmicutes_Clostridia_Lachnospirales_Lachnospiraceae_NA_NA.37	0	0	1	0	0	0	0	1	0	0	0
1803	Bacteria_Firmicutes_Clostridia_Lachnospirales_Lachnospiraceae_Tyzzerella_NA.39	0	0	0	0	0	0	1	0	0	0	0
1804	Bacteria_Actinobacteriota_Coriobacteriia_Coriobacteriales_CoriobacterialesIncertaeSedis_Raoultibacter_NA.10	1	0	1	0	0	0	0	1	0	1	0
1805	Bacteria_Firmicutes_Clostridia_Oscillospirales_Ruminococcaceae_CandidatusSoleaferrea_NA.44	1	1	0	1	1	1	0	1	0	0	0
1806	Bacteria_Firmicutes_Clostridia_ClostridiavadinBB60group_NA_NA_NA.29	1	0	1	0	0	0	0	1	0	1	0
1807	Bacteria_Firmicutes_Clostridia_Oscillospirales_Ruminococcaceae_NA_NA.130	0	0	0	0	1	0	0	0	0	0	1
1808	Bacteria_Firmicutes_Clostridia_Lachnospirales_Lachnospiraceae_Tyzzerella_NA.40	0	1	0	0	0	0	0	0	0	0	0
1809	Bacteria_Desulfobacterota_Desulfovibrionia_Desulfovibrionales_Desulfovibrionaceae_Desulfovibrio_NA.165	1	1	0	1	0	0	1	1	0	0	0
1810	Bacteria_Firmicutes_Clostridia_Christensenellales_Christensenellaceae_NA_NA.43	0	0	0	1	1	0	1	0	0	0	0
1811	Bacteria_Firmicutes_Bacilli_RF39_NA_NA_NA.48	1	0	0	0	0	0	1	0	0	0	0
1812	Bacteria_Firmicutes_Clostridia_Lachnospirales_Lachnospiraceae_Tyzzerella_NA.41	1	1	1	0	1	0	1	1	1	0	0
1813	Bacteria_Bacteroidota_Bacteroidia_Bacteroidales_Rikenellaceae_Alistipes_NA.67	0	1	0	1	1	1	0	0	0	0	1
1814	Bacteria_Desulfobacterota_Desulfovibrionia_Desulfovibrionales_Desulfovibrionaceae_Desulfovibrio_NA.166	0	0	0	1	0	0	1	1	0	0	0
1815	Bacteria_Firmicutes_Clostridia_Lachnospirales_Lachnospiraceae_Tyzzerella_NA.42	0	1	0	1	1	0	1	0	0	1	1
1816	Bacteria_Proteobacteria_Alphaproteobacteria_NA_NA_NA_NA.7	1	0	0	1	0	0	0	1	0	1	0
1817	Bacteria_Bacteroidota_Bacteroidia_Bacteroidales_Rikenellaceae_Alistipes_NA.68	0	0	0	0	0	0	0	1	0	0	0
1818	Bacteria_Firmicutes_Clostridia_Christensenellales_Christensenellaceae_ChristensenellaceaeR.7group_NA.165	0	0	0	0	0	0	0	1	1	1	0
1819	Bacteria_Bacteroidota_Bacteroidia_Bacteroidales_Tannerellaceae_Parabacteroides_NA.32	0	0	0	1	0	0	1	0	0	0	0
1820	Bacteria_Firmicutes_Clostridia_Christensenellales_Christensenellaceae_ChristensenellaceaeR.7group_NA.166	0	0	0	0	0	0	1	1	0	0	0
1821	Bacteria_Firmicutes_Clostridia_Oscillospirales_Ruminococcaceae_CandidatusSoleaferrea_NA.45	1	0	0	1	0	0	0	0	0	0	0
1822	Bacteria_Firmicutes_Clostridia_Oscillospirales_Ruminococcaceae_NA_NA.131	0	1	1	0	1	0	1	1	0	0	1
1823	Bacteria_Firmicutes_Bacilli_RF39_NA_NA_NA.49	1	0	0	0	0	0	0	0	1	1	1
1824	Bacteria_Firmicutes_Bacilli_Acholeplasmatales_Acholeplasmataceae_Acholeplasma_NA.17	0	0	0	0	0	0	1	0	0	0	0
1825	Bacteria_Actinobacteriota_Actinobacteria_Micrococcales_Microbacteriaceae_Rhodoluna_limnophila	1	0	0	0	0	0	0	1	0	1	0
1826	Bacteria_Firmicutes_Clostridia_Oscillospirales_Ruminococcaceae_NA_NA.132	0	1	1	1	0	1	0	0	1	0	0
1827	Bacteria_Firmicutes_Clostridia_Oscillospirales_Ruminococcaceae_NA_NA.134	1	0	0	0	1	0	0	1	1	1	0
1828	Bacteria_Firmicutes_Clostridia_Lachnospirales_Lachnospiraceae_Tyzzerella_NA.43	1	1	1	0	0	1	1	0	0	0	0
1829	Bacteria_Planctomycetota_Planctomycetes_Pirellulales_Pirellulaceae_Termiteplanctomycetecluster_NA.26	1	0	0	1	1	1	1	0	0	0	1
1830	Bacteria_Firmicutes_Clostridia_Oscillospirales_Ruminococcaceae_NA_NA.135	0	0	0	1	1	0	0	0	0	0	0
1831	Bacteria_Firmicutes_Clostridia_Lachnospirales_Lachnospiraceae_NA_NA.38	0	1	0	1	1	1	1	0	1	0	0
1832	Bacteria_Firmicutes_Clostridia_Christensenellales_Christensenellaceae_ChristensenellaceaeR.7group_NA.167	0	0	0	0	1	0	1	0	0	0	1
1833	Bacteria_Firmicutes_Clostridia_Oscillospirales_Ruminococcaceae_NA_NA.136	1	0	1	1	1	0	0	0	0	0	1
1834	Bacteria_Firmicutes_Clostridia_Lachnospirales_Lachnospiraceae_NA_NA.39	0	1	0	0	1	1	1	1	0	0	1
1835	Bacteria_Firmicutes_Clostridia_Oscillospirales_Ruminococcaceae_NA_NA.137	1	0	0	0	1	0	0	1	1	0	0
1836	Bacteria_Desulfobacterota_Desulfovibrionia_Desulfovibrionales_Desulfovibrionaceae_Desulfovibrio_NA.167	0	1	0	1	0	1	1	0	0	0	1
1837	Bacteria_Firmicutes_Clostridia_Oscillospirales_Oscillospiraceae_NK4A214group_NA.10	0	0	0	0	0	0	0	1	0	0	0
1838	Bacteria_Firmicutes_Clostridia_Oscillospirales_Oscillospiraceae_NA_NA.26	1	0	0	1	0	0	1	1	1	1	0
1839	Bacteria_Firmicutes_Clostridia_ClostridiaUCG.014_NA_NA_NA.25	0	1	0	0	0	0	1	0	1	0	0
1840	Bacteria_Firmicutes_Clostridia_Oscillospirales_Oscillospiraceae_NA_NA.27	0	0	0	0	1	0	1	0	1	1	0
1841	Bacteria_Firmicutes_Clostridia_ClostridiaUCG.014_NA_NA_NA.26	1	1	1	1	1	0	1	0	1	0	0
1842	Bacteria_Firmicutes_Clostridia_ClostridiavadinBB60group_NA_NA_NA.30	0	0	1	0	0	0	1	1	1	0	0
1843	Bacteria_Desulfobacterota_Desulfovibrionia_Desulfovibrionales_Desulfovibrionaceae_NA_NA.15	0	0	0	0	0	0	1	1	0	0	0
1844	Bacteria_Bacteroidota_Bacteroidia_Bacteroidales_Rikenellaceae_Alistipes_NA.69	0	1	1	1	1	1	0	1	1	0	0
1845	Bacteria_Firmicutes_Clostridia_ClostridiaUCG.014_NA_NA_NA.27	0	0	0	0	0	0	1	0	0	0	0
1846	Bacteria_Firmicutes_Clostridia_ClostridiaUCG.014_NA_NA_NA.28	1	0	1	0	0	1	0	1	1	1	0
1847	Bacteria_Elusimicrobiota_Elusimicrobia_Elusimicrobiales_Elusimicrobiaceae_Elusimicrobium_NA.9	0	1	0	1	1	1	1	0	0	0	0
1848	Bacteria_Proteobacteria_Alphaproteobacteria_Rhodospirillales_NA_NA_NA.37	1	1	0	1	0	1	1	1	0	0	0
1849	Bacteria_Desulfobacterota_Desulfovibrionia_Desulfovibrionales_Desulfovibrionaceae_Desulfovibrio_NA.169	1	1	0	1	1	1	0	0	0	0	0
1850	Bacteria_Firmicutes_Clostridia_NA_NA_NA_NA.34	0	0	0	0	0	0	1	0	0	0	0
1851	Bacteria_Bacteroidota_Bacteroidia_Bacteroidales_Rikenellaceae_Rikenella_NA.2	1	0	0	1	0	0	0	1	1	1	0
1852	Bacteria_Desulfobacterota_Desulfovibrionia_Desulfovibrionales_Desulfovibrionaceae_Desulfovibrio_NA.170	1	0	0	1	1	0	1	1	0	1	0
1853	Bacteria_Firmicutes_Clostridia_ClostridiaUCG.014_NA_NA_NA.29	1	1	0	1	0	1	1	0	1	0	0
1854	Bacteria_Firmicutes_Clostridia_Oscillospirales_Ruminococcaceae_NA_NA.138	0	0	0	1	0	0	0	0	0	0	0
1855	Bacteria_Firmicutes_Clostridia_Oscillospirales_Ruminococcaceae_CandidatusSoleaferrea_NA.46	0	0	0	1	0	0	0	1	1	0	0
1856	Bacteria_Firmicutes_Clostridia_Oscillospirales_Ruminococcaceae_NA_NA.139	0	0	0	0	1	0	0	0	0	0	0
1857	Bacteria_Firmicutes_Clostridia_ClostridiaUCG.014_NA_NA_NA.30	0	0	0	0	1	1	1	0	0	1	0
1858	Bacteria_Elusimicrobiota_Endomicrobia_Endomicrobiales_Endomicrobiaceae_Endomicrobium_NA.7	0	0	0	0	0	0	1	0	0	0	0
1859	Bacteria_Firmicutes_Clostridia_ClostridiaUCG.014_NA_NA_NA.31	1	1	0	1	0	1	0	1	1	1	0
1860	Bacteria_Actinobacteriota_Actinobacteria_Frankiales_Sporichthyaceae_CandidatusPlanktophila_NA	1	0	0	0	0	0	0	1	1	1	0
1861	Bacteria_Firmicutes_Clostridia_Oscillospirales_Oscillospiraceae_NK4A214group_NA.11	1	0	1	0	0	0	0	0	1	0	0
1862	Bacteria_Proteobacteria_Alphaproteobacteria_NA_NA_NA_NA.8	1	1	1	1	0	0	1	0	1	1	0
1863	Bacteria_Desulfobacterota_Desulfovibrionia_Desulfovibrionales_Desulfovibrionaceae_Desulfovibrio_NA.171	0	1	0	1	0	1	1	0	0	0	0
1864	Bacteria_Proteobacteria_Gammaproteobacteria_Coxiellales_Coxiellaceae_Coxiella_NA	1	0	0	0	0	1	1	1	0	0	0
1865	Bacteria_Desulfobacterota_Desulfovibrionia_Desulfovibrionales_Desulfovibrionaceae_Desulfovibrio_NA.172	0	0	0	1	0	1	0	0	0	0	0
1866	Bacteria_Firmicutes_Negativicutes_Acidaminococcales_Acidaminococcaceae_NA_NA.8	1	0	1	0	0	0	0	1	1	1	0
1867	Bacteria_Desulfobacterota_Desulfobacteria_Desulfobacterales_Desulfatiferula_NA_NA	1	1	0	1	1	1	1	1	1	1	0
1868	Bacteria_Patescibacteria_Gracilibacteria_JGI0000069.P22_NA_NA_NA.15	1	0	1	0	0	0	1	1	0	0	0
1869	Bacteria_Proteobacteria_Alphaproteobacteria_NA_NA_NA_NA.9	1	0	1	0	0	0	0	1	1	1	0
1870	Bacteria_Desulfobacterota_Desulfovibrionia_Desulfovibrionales_Desulfovibrionaceae_Desulfovibrio_NA.173	0	1	0	1	1	1	1	0	0	0	1
1871	Bacteria_Desulfobacterota_Desulfobacteria_Desulfatiglandales_Desulfatiglandaceae_Desulfatiglans_NA	1	1	1	1	1	1	1	1	1	1	0
1872	Bacteria_Firmicutes_Clostridia_Christensenellales_Christensenellaceae_NA_NA.44	1	0	1	1	1	0	1	0	1	0	0
1873	Bacteria_Firmicutes_Clostridia_Oscillospirales_Hydrogenoanaerobacterium_NA_NA.5	1	0	0	1	1	0	0	1	1	1	0
1874	Bacteria_Firmicutes_Clostridia_Christensenellales_Christensenellaceae_ChristensenellaceaeR.7group_NA.168	0	0	1	0	0	0	0	0	0	1	0
1875	Bacteria_Firmicutes_Clostridia_Peptococcales_Peptococcaceae_NA_NA.26	0	0	0	0	1	0	1	0	0	0	0
1876	Bacteria_Firmicutes_Clostridia_Oscillospirales_Oscillospiraceae_NA_NA.28	1	0	1	1	0	0	0	1	1	0	0
1877	Bacteria_Firmicutes_Clostridia_Oscillospirales_Ruminococcaceae_CandidatusSoleaferrea_NA.47	0	0	1	0	0	0	0	0	1	0	0
1878	Bacteria_NA_NA_NA_NA_NA_NA.6	1	0	0	0	1	1	0	0	0	1	0
1879	Bacteria_Firmicutes_Clostridia_Christensenellales_Christensenellaceae_NA_NA.45	0	0	0	0	1	0	1	0	0	0	0
1880	Bacteria_Firmicutes_Clostridia_Lachnospirales_Lachnospiraceae_Tyzzerella_NA.44	1	1	1	0	1	1	1	0	0	1	0
1881	Bacteria_Firmicutes_Clostridia_Christensenellales_Christensenellaceae_ChristensenellaceaeR.7group_NA.169	0	0	1	0	1	1	1	0	1	0	0
1882	Bacteria_Firmicutes_Clostridia_Oscillospirales_Eubacteriumcoprostanoligenesgroup_NA_NA.25	0	0	1	1	1	0	0	0	0	0	0
1883	Bacteria_Firmicutes_Clostridia_Christensenellales_Christensenellaceae_ChristensenellaceaeR.7group_NA.170	0	0	0	1	1	0	0	0	0	0	1
1884	Bacteria_Firmicutes_Clostridia_Oscillospirales_Ruminococcaceae_CandidatusSoleaferrea_NA.48	0	0	0	0	0	1	1	1	0	0	0
1885	Bacteria_Firmicutes_Clostridia_NA_NA_NA_NA.35	0	1	0	1	1	1	0	0	1	0	1
1886	Bacteria_Firmicutes_Clostridia_Oscillospirales_NA_NA_NA.9	0	1	0	1	0	0	0	0	0	0	0
1887	Bacteria_Desulfobacterota_Desulfovibrionia_Desulfovibrionales_Desulfovibrionaceae_Desulfovibrio_NA.174	0	0	1	1	1	0	1	0	1	0	1
1888	Bacteria_Firmicutes_Clostridia_Oscillospirales_Ruminococcaceae_NA_NA.140	1	0	0	0	1	0	1	0	0	0	0
1889	Bacteria_Firmicutes_Clostridia_Christensenellales_Christensenellaceae_ChristensenellaceaeR.7group_NA.171	0	0	0	0	0	0	1	0	0	0	0
1890	Bacteria_Patescibacteria_Gracilibacteria_JGI0000069.P22_NA_NA_NA.16	0	0	0	0	0	0	0	1	0	1	0
1891	Bacteria_Firmicutes_Bacilli_RF39_NA_NA_NA.50	0	0	1	0	0	0	0	0	1	0	0
1892	Bacteria_Firmicutes_Clostridia_Lachnospirales_Lachnospiraceae_NA_NA.40	0	0	0	0	0	1	0	0	1	1	0
1893	Bacteria_Firmicutes_Bacilli_Erysipelotrichales_Erysipelatoclostridiaceae_UCG.004_NA.11	1	1	1	1	0	0	0	1	0	1	0
1894	Bacteria_Firmicutes_Clostridia_Christensenellales_Christensenellaceae_NA_NA.46	0	0	0	1	1	0	0	1	0	0	1
1895	Bacteria_NA_NA_NA_NA_NA_NA.7	1	0	1	0	0	0	0	1	1	1	0
1896	Bacteria_Proteobacteria_Gammaproteobacteria_Pseudomonadales_Moraxellaceae_Enhydrobacter_NA	1	0	1	0	0	1	0	1	1	1	0
1897	Bacteria_Firmicutes_Clostridia_Oscillospirales_Ruminococcaceae_NA_NA.141	0	0	0	0	1	0	0	1	0	0	1
1898	Bacteria_Firmicutes_Clostridia_Lachnospirales_Lachnospiraceae_NA_NA.41	0	1	0	1	1	1	1	0	0	0	0
1899	Bacteria_Firmicutes_Clostridia_ClostridiaUCG.014_NA_NA_NA.32	1	0	0	0	0	0	1	0	1	0	0
1900	Bacteria_Proteobacteria_Alphaproteobacteria_Rhodospirillales_NA_NA_NA.38	0	1	0	1	0	0	1	0	0	0	0
1901	Bacteria_Planctomycetota_vadinHA49_NA_NA_NA_NA.41	0	0	1	0	1	0	0	0	0	0	1
1902	Bacteria_Desulfobacterota_Desulfovibrionia_Desulfovibrionales_Desulfovibrionaceae_Desulfovibrio_NA.175	0	0	0	1	1	0	1	1	1	0	0
1903	Bacteria_Firmicutes_Clostridia_Oscillospirales_Ruminococcaceae_NA_NA.142	0	0	0	1	1	0	0	0	0	0	1
1904	Bacteria_Bacteroidota_Bacteroidia_Bacteroidales_Dysgonomonadaceae_Dysgonomonas_NA.38	0	0	0	1	0	0	0	0	0	1	0
1905	Bacteria_Bacteroidota_Bacteroidia_Bacteroidales_Tannerellaceae_Parabacteroides_NA.33	1	0	1	0	0	0	0	0	0	0	0
1906	Bacteria_Firmicutes_Clostridia_Lachnospirales_Lachnospiraceae_NA_NA.42	0	0	0	1	1	1	0	0	0	1	1
1907	Bacteria_Firmicutes_Clostridia_Oscillospirales_Ruminococcaceae_IncertaeSedis_NA.10	1	0	1	0	0	0	0	0	1	0	0
1908	Bacteria_Firmicutes_Clostridia_Oscillospirales_Ruminococcaceae_CandidatusSoleaferrea_NA.49	0	1	1	1	1	1	1	0	0	0	0
1909	Bacteria_Firmicutes_Clostridia_Oscillospirales_Oscillospiraceae_NK4A214group_NA.12	1	0	0	0	0	0	0	0	0	0	0
1910	Bacteria_Firmicutes_Clostridia_Hungateiclostridiaceae_NA_NA_NA.2	1	0	1	0	0	1	0	0	1	0	0
1911	Bacteria_Firmicutes_Clostridia_Oscillospirales_Butyricicoccaceae_UCG.009_NA.20	1	1	0	1	1	1	1	1	1	0	0
1912	Bacteria_Firmicutes_Clostridia_Oscillospirales_Ruminococcaceae_CandidatusSoleaferrea_NA.50	0	0	0	1	0	0	1	1	1	1	0
1913	Bacteria_Firmicutes_Bacilli_Erysipelotrichales_Erysipelatoclostridiaceae_UCG.004_NA.12	1	0	0	0	0	0	0	1	0	1	0
1914	Bacteria_Firmicutes_Clostridia_ClostridiaUCG.014_NA_NA_NA.34	0	1	0	1	1	0	0	0	0	0	0
1915	Bacteria_Firmicutes_NA_NA_NA_NA_NA.11	1	0	1	1	1	0	1	1	1	0	1
1916	Bacteria_Proteobacteria_Alphaproteobacteria_NA_NA_NA_NA.10	1	0	0	0	0	0	0	1	1	1	0
1917	Bacteria_Firmicutes_Clostridia_Oscillospirales_Butyricicoccaceae_UCG.009_NA.21	1	0	0	1	1	1	1	0	1	1	0
1918	Bacteria_Synergistota_Synergistia_Synergistales_Synergistaceae_CandidatusTammella_NA.17	0	0	1	0	0	0	1	0	0	0	0
1919	Bacteria_Bacteroidota_Bacteroidia_Bacteroidales_Dysgonomonadaceae_Dysgonomonas_NA.39	0	0	0	0	1	0	1	0	0	0	1
1920	Bacteria_Planctomycetota_vadinHA49_NA_NA_NA_NA.42	1	0	0	1	0	0	1	0	0	0	0
1921	Bacteria_Desulfobacterota_Desulfovibrionia_Desulfovibrionales_Desulfovibrionaceae_Desulfovibrio_NA.176	1	0	0	0	0	0	0	1	0	1	0
1922	Bacteria_Firmicutes_Clostridia_Oscillospirales_Ruminococcaceae_CandidatusSoleaferrea_NA.51	0	0	0	1	1	0	0	1	0	1	0
1923	Bacteria_Firmicutes_Clostridia_Oscillospirales_Ruminococcaceae_NA_NA.143	0	0	0	1	1	0	0	0	0	0	1
1924	Bacteria_Firmicutes_Clostridia_Christensenellales_Christensenellaceae_NA_NA.47	0	1	0	1	0	0	1	1	0	0	0
1925	Bacteria_Desulfobacterota_Desulfovibrionia_Desulfovibrionales_Desulfovibrionaceae_Desulfovibrio_NA.177	0	0	0	1	0	0	0	1	0	0	0
1926	Bacteria_Firmicutes_Bacilli_RF39_NA_NA_NA.51	1	1	0	1	1	1	1	0	0	1	0
1927	Bacteria_Firmicutes_Clostridia_NA_NA_NA_NA.36	0	1	0	1	1	0	1	0	0	0	0
1928	Bacteria_Bacteroidota_Bacteroidia_Bacteroidales_Tannerellaceae_Parabacteroides_NA.34	0	0	0	0	1	0	0	0	0	0	0
1929	Bacteria_Rs.K70termitegroup_NA_NA_NA_NA_NA.9	1	1	1	0	0	1	0	1	1	1	1
1930	Bacteria_Firmicutes_Clostridia_Christensenellales_Christensenellaceae_ChristensenellaceaeR.7group_NA.173	0	1	0	1	1	0	1	0	0	1	0
1931	Bacteria_Proteobacteria_Alphaproteobacteria_Rhodospirillales_NA_NA_NA.39	0	0	1	1	0	0	0	0	0	0	1
1932	Bacteria_Firmicutes_Clostridia_Oscillospirales_Ruminococcaceae_CandidatusSoleaferrea_NA.52	1	0	1	0	0	0	1	0	0	0	0
1933	Bacteria_Firmicutes_Clostridia_NA_NA_NA_NA.37	1	0	0	1	1	0	1	1	1	0	0
1934	Bacteria_Firmicutes_Clostridia_Oscillospirales_Ruminococcaceae_NA_NA.144	0	0	0	1	0	0	0	0	0	0	1
1935	Bacteria_Firmicutes_Clostridia_Oscillospirales_Eubacteriumcoprostanoligenesgroup_NA_NA.26	0	1	0	1	0	1	0	1	0	0	0
1936	Bacteria_Firmicutes_Bacilli_RF39_NA_NA_NA.52	1	1	1	1	1	0	1	1	1	1	0
1937	Bacteria_Firmicutes_Clostridia_Christensenellales_Christensenellaceae_NA_NA.48	0	0	0	1	0	0	1	0	0	1	1
1938	Bacteria_Proteobacteria_Alphaproteobacteria_Rhodospirillales_NA_NA_NA.40	0	1	0	1	0	0	1	0	1	1	0
1939	Bacteria_Firmicutes_Clostridia_Oscillospirales_Oscillospiraceae_NA_NA.29	1	1	1	0	1	1	0	1	1	0	0
1940	Bacteria_Firmicutes_Clostridia_Peptostreptococcales.Tissierellales_Anaerovoracaceae_NA_NA.29	0	0	0	1	1	0	1	0	1	0	1
1941	Bacteria_Firmicutes_Clostridia_Christensenellales_Christensenellaceae_ChristensenellaceaeR.7group_NA.175	0	0	1	0	0	0	1	0	0	0	0
1942	Bacteria_Planctomycetota_vadinHA49_NA_NA_NA_NA.43	0	1	0	1	0	1	1	0	0	0	1
1943	Bacteria_Planctomycetota_Planctomycetes_Pirellulales_Pirellulaceae_Termiteplanctomycetecluster_NA.29	0	0	0	1	1	0	1	0	0	0	0
1944	Bacteria_Firmicutes_Clostridia_Eubacteriales_Anaerofustaceae_Anaerofustis_NA.3	0	0	0	0	1	1	1	1	1	1	0
1945	Bacteria_Desulfobacterota_Desulfovibrionia_Desulfovibrionales_Desulfovibrionaceae_Desulfovibrio_NA.178	0	0	0	0	0	0	0	0	1	0	0
1946	Bacteria_Firmicutes_Clostridia_Oscillospirales_Ruminococcaceae_NA_NA.145	0	0	0	1	0	0	0	0	0	0	0
1947	Bacteria_Firmicutes_Clostridia_Oscillospirales_Ruminococcaceae_NA_NA.146	1	0	0	0	1	0	0	0	0	0	0
1948	Bacteria_Firmicutes_Clostridia_Oscillospirales_Ruminococcaceae_NA_NA.147	0	0	0	0	1	0	0	0	0	0	1
1949	Bacteria_Proteobacteria_Alphaproteobacteria_NA_NA_NA_NA.11	1	1	1	0	0	1	0	0	1	0	0
1950	Bacteria_Planctomycetota_vadinHA49_NA_NA_NA_NA.44	0	0	0	0	1	0	1	0	0	0	1
1951	Bacteria_Firmicutes_Clostridia_Oscillospirales_Ruminococcaceae_NA_NA.148	1	0	0	0	1	0	0	0	1	0	0
1952	Bacteria_Deferribacterota_Deferribacteres_Deferribacterales_Deferribacteraceae_Mucispirillum_NA.13	1	1	1	0	1	0	1	1	0	1	0
1953	Bacteria_Proteobacteria_Alphaproteobacteria_Rhodospirillales_NA_NA_NA.41	1	0	1	0	0	0	0	1	1	1	0
1954	Bacteria_Elusimicrobiota_Elusimicrobia_Elusimicrobiales_Elusimicrobiaceae_Elusimicrobium_NA.11	0	0	0	0	1	0	0	1	0	1	0
1955	Bacteria_Firmicutes_Clostridia_Oscillospirales_Ruminococcaceae_CandidatusSoleaferrea_NA.53	0	0	0	1	1	0	1	1	0	0	0
1956	Bacteria_Firmicutes_Bacilli_RF39_NA_NA_NA.53	1	0	1	0	0	0	0	1	1	1	0
1957	Bacteria_Firmicutes_Clostridia_ClostridiaUCG.014_NA_NA_NA.35	0	0	1	0	1	0	1	1	0	0	0
1958	Bacteria_Firmicutes_Clostridia_Lachnospirales_Lachnospiraceae_Robinsoniella_NA.4	0	0	1	0	0	0	0	0	1	1	0
1959	Bacteria_Firmicutes_Clostridia_Oscillospirales_Ruminococcaceae_NA_NA.149	0	0	0	0	1	0	0	0	0	0	1
1960	Bacteria_Firmicutes_Clostridia_Christensenellales_Christensenellaceae_NA_NA.49	0	0	0	1	0	0	0	0	0	0	1
1961	Bacteria_Desulfobacterota_Desulfovibrionia_Desulfovibrionales_Desulfovibrionaceae_Desulfovibrio_NA.179	0	1	0	1	1	0	1	0	0	0	0
1962	Bacteria_Planctomycetota_Planctomycetes_Pirellulales_Pirellulaceae_Termiteplanctomycetecluster_NA.30	0	0	0	0	0	0	0	0	0	1	0
1963	Bacteria_Firmicutes_Clostridia_Christensenellales_Christensenellaceae_ChristensenellaceaeR.7group_NA.176	0	0	0	1	1	0	0	1	0	0	0
1964	Bacteria_Desulfobacterota_Desulfovibrionia_Desulfovibrionales_Desulfovibrionaceae_Desulfovibrio_NA.180	0	1	0	1	1	1	1	0	0	0	0
1965	Bacteria_Firmicutes_Clostridia_Oscillospirales_Ruminococcaceae_NA_NA.150	1	0	0	0	0	0	0	0	0	0	0
1966	Bacteria_Firmicutes_Clostridia_ClostridiaUCG.014_NA_NA_NA.36	1	1	0	1	1	1	1	0	0	0	0
1967	Bacteria_Firmicutes_Clostridia_Peptostreptococcales.Tissierellales_Anaerovoracaceae_NA_NA.30	0	0	0	1	1	0	1	0	0	0	0
1968	Bacteria_Firmicutes_Clostridia_Christensenellales_Christensenellaceae_ChristensenellaceaeR.7group_NA.177	0	0	0	0	1	0	1	0	0	0	1
1969	Bacteria_Planctomycetota_Planctomycetes_Pirellulales_Pirellulaceae_Termiteplanctomycetecluster_NA.31	0	0	0	0	0	1	1	0	0	1	0
1970	Bacteria_Firmicutes_Clostridia_Oscillospirales_Butyricicoccaceae_UCG.009_NA.22	0	0	0	1	1	0	0	0	0	0	1
1971	Bacteria_Planctomycetota_vadinHA49_NA_NA_NA_NA.45	0	1	0	1	0	1	1	0	0	0	1
1972	Bacteria_Firmicutes_Clostridia_Christensenellales_Christensenellaceae_ChristensenellaceaeR.7group_NA.178	0	0	0	1	1	0	1	0	0	0	0
1973	Bacteria_Verrucomicrobiota_Verrucomicrobiae_Opitutales_Puniceicoccaceae_NA_NA	1	0	0	0	1	0	1	1	0	0	1
1974	Bacteria_Firmicutes_Bacilli_RF39_NA_NA_NA.54	0	1	0	0	0	0	0	1	1	1	0
1975	Bacteria_Bacteroidota_Bacteroidia_Bacteroidales_Rikenellaceae_Alistipes_NA.70	0	0	0	0	1	0	0	1	0	1	0
1976	Bacteria_Firmicutes_Clostridia_Peptococcales_Peptococcaceae_NA_NA.27	0	0	0	0	1	0	1	1	0	1	0
1977	Bacteria_Firmicutes_Bacilli_RF39_NA_NA_NA.55	1	1	1	1	0	0	0	1	0	1	0
1978	Bacteria_Desulfobacterota_Desulfovibrionia_Desulfovibrionales_Desulfovibrionaceae_NA_NA.16	0	1	0	1	1	1	1	0	0	0	1
1979	Bacteria_NA_NA_NA_NA_NA_NA.8	0	1	0	1	1	1	1	1	1	0	1
1980	Bacteria_Firmicutes_Clostridia_Christensenellales_Christensenellaceae_NA_NA.50	1	1	1	1	1	1	0	1	0	0	1
1981	Bacteria_Firmicutes_Clostridia_Oscillospirales_Ruminococcaceae_NA_NA.151	0	0	0	1	0	0	1	0	0	0	0
1982	Bacteria_Bacteroidota_Bacteroidia_Bacteroidales_Dysgonomonadaceae_NA_NA.37	1	0	1	0	0	0	0	1	1	1	0
1983	Bacteria_Firmicutes_Bacilli_Erysipelotrichales_Erysipelotrichaceae_Erysipelothrix_NA.2	1	0	1	1	1	0	1	1	1	1	0
1984	Bacteria_Actinobacteriota_Coriobacteriia_Coriobacteriales_CoriobacterialesIncertaeSedis_Raoultibacter_NA.11	1	0	1	1	1	0	0	0	1	1	0
1985	Bacteria_Firmicutes_Clostridia_Lachnospirales_Lachnospiraceae_NA_NA.43	0	0	1	0	0	0	0	1	1	1	0
1986	Bacteria_Firmicutes_Bacilli_Erysipelotrichales_Erysipelotrichaceae_Breznakia_NA.6	0	0	0	0	0	0	1	0	0	0	0
1987	Bacteria_Bacteroidota_Bacteroidia_Bacteroidales_PeH15_NA_NA.4	0	0	1	0	0	0	0	0	0	0	0
1988	Bacteria_Bdellovibrionota_Oligoflexia_Oligoflexales_NA_NA_NA.1	1	0	1	0	0	0	1	0	1	0	0
1989	Bacteria_Firmicutes_Clostridia_Oscillospirales_Eubacteriumcoprostanoligenesgroup_NA_NA.27	1	1	0	1	1	1	1	0	0	0	1
1990	Bacteria_Firmicutes_Clostridia_Peptostreptococcales.Tissierellales_Anaerovoracaceae_NA_NA.31	0	0	0	1	0	0	0	1	0	0	0
1991	Bacteria_Planctomycetota_Planctomycetes_Pirellulales_Pirellulaceae_Termiteplanctomycetecluster_NA.32	0	0	0	0	1	1	1	0	0	1	0
1992	Bacteria_Firmicutes_Clostridia_Christensenellales_Christensenellaceae_ChristensenellaceaeR.7group_NA.179	0	0	0	1	1	1	1	0	0	0	0
1993	Bacteria_Firmicutes_Clostridia_Oscillospirales_Ruminococcaceae_NA_NA.152	0	0	0	0	1	0	0	0	1	1	0
1994	Bacteria_Firmicutes_Clostridia_Christensenellales_Christensenellaceae_ChristensenellaceaeR.7group_NA.180	0	0	0	1	1	1	0	0	0	0	0
1995	Bacteria_NA_NA_NA_NA_NA_NA.9	1	1	1	1	0	0	0	1	1	1	0
1996	Bacteria_Firmicutes_Clostridia_Oscillospirales_Ruminococcaceae_CandidatusSoleaferrea_NA.54	0	0	0	0	1	0	0	0	0	0	0
1997	Bacteria_Planctomycetota_Planctomycetes_Pirellulales_Pirellulaceae_Termiteplanctomycetecluster_NA.33	0	0	0	0	1	0	0	0	0	0	0
1998	Bacteria_Firmicutes_Clostridia_Christensenellales_Christensenellaceae_ChristensenellaceaeR.7group_NA.181	0	0	1	1	0	1	0	1	0	0	1
1999	Bacteria_Firmicutes_Clostridia_Oscillospirales_Ruminococcaceae_NA_NA.153	0	1	0	0	1	0	0	0	0	0	0
[truncated: 1,405 more rows]
